# Supplementary material for: Transcriptomic Analysis Identifies Differentially Expressed Genes (DEGs) Associated with Bolting and Flowering in Radish (Raphanus sativus L.)
Source: Front Plant Sci. 2016 May 24;7:682. doi: 10.3389/fpls.2016.00682 (PMC4877535; doi:10.3389/fpls.2016.00682)
Supplement: Table S1 — All the identified DEGs in NAU-VS and NAU-RS libraries. [file Table1.XLSX]

## Sheet: Sheet1
Table S1 All the identified DEGs in NAU-VS and NAU-RS libraries
GeneID	Gene_length	NAU-VS-Expression	NAU-RS-Expression	NAU-VS-RPKM	NAU-RS-RPKM	log2 Ratio(NAU-RS/NAU-VS)	Up-Down-Regulation(NAU-RS/NAU-VS)	P-value	FDR	KEGG Orthology	GO Component	GO Function	GO Process	Blast nr
Unigene20235_NAU-LB	321	0	279	0.01	167.123	14.0286	Up	1.98097e-71	9.50133e-70	-	GO:0043231//intracellular membrane-bounded organelle	GO:0004871//signal transducer activity	GO:0010647//positive regulation of cell communication;GO:0009267//cellular response to starvation	gi|15241275|ref|NP_197515.1|/3.39433e-14/SPX domain-containing protein 1 [Arabidopsis thaliana]
Unigene20543_NAU-LB	329	0	191	0.01	111.628	13.4464	Up	4.09702e-49	1.37946e-47	-	-	-	-	-
Unigene20319_NAU-LB	253	0	125	0.01	95.0004	13.2137	Up	2.2344e-32	5.09885e-31	-	-	-	-	gi|116792173|gb|ABK26259.1|/1.03679e-07/unknown [Picea sitchensis]
CL8221.Contig2_NAU-LB	1029	0	391	0.01	73.063	12.8349	Up	7.8563e-100	5.28721e-98	-	GO:0043231//intracellular membrane-bounded organelle	GO:0003676//nucleic acid binding;GO:0001071//nucleic acid binding transcription factor activity	GO:0010260//organ senescence;GO:0016049//cell growth;GO:0009791//post-embryonic development	gi|385271601|gb|AFI56994.1|/2.1755e-137/NAC2, partial [Brassica napus]
Unigene6674_NAU-LB	627	0	204	0.01	62.5603	12.611	Up	2.06942e-52	7.38363e-51	-	GO:0009536//plastid	-	-	gi|30682825|ref|NP_850063.1|/3.0434e-56/uncharacterized protein [Arabidopsis thaliana]
CL8221.Contig1_NAU-LB	1002	0	267	0.01	51.2365	12.323	Up	2.18732e-68	1.01157e-66	-	GO:0043231//intracellular membrane-bounded organelle	GO:0003676//nucleic acid binding;GO:0001071//nucleic acid binding transcription factor activity	GO:0010260//organ senescence;GO:0016049//cell growth;GO:0009791//post-embryonic development	gi|312283489|dbj|BAJ34610.1|/1.35813e-136/unnamed protein product [Thellungiella halophila]
Unigene14213_NAU-LB	843	0	212	0.01	48.3553	12.2395	Up	1.93713e-54	7.1693e-53	K09753|1|3e-38|156|gmx:100799994|cinnamoyl-CoA reductase [EC:1.2.1.44]	GO:0044464//cell part	GO:0048037//cofactor binding;GO:0016616//oxidoreductase activity, acting on the CH-OH group of donors, NAD or NADP as acceptor	GO:0009699//phenylpropanoid biosynthetic process	gi|312282147|dbj|BAJ33939.1|/4.52406e-92/unnamed protein product [Thellungiella halophila]
Unigene26816_NAU-LB	353	0	78	0.01	42.487	12.0528	Up	1.85232e-20	2.77095e-19	-	-	-	-	-
CL6810.Contig3_NAU-LB	1100	0	199	0.01	34.7854	11.7643	Up	3.83512e-51	1.3383e-49	K13248|1|2e-138|489|aly:ARALYDRAFT_889181|pyridoxal phosphate phosphatase PHOSPHO2 [EC:3.1.3.74]	GO:0044464//cell part	GO:0016791//phosphatase activity;GO:0016462//pyrophosphatase activity	GO:0007165//signal transduction;GO:0051259//protein oligomerization;GO:0006796//phosphate-containing compound metabolic process;GO:0009267//cellular response to starvation	gi|297850166|ref|XP_002892964.1|/3.12962e-137/phosphoric monoester hydrolase [Arabidopsis lyrata subsp. lyrata]
Unigene26239_NAU-LB	254	0	44	0.01	33.3085	11.7017	Up	7.7562e-12	7.14787e-11	K02575|1|4e-24|107|gmx:100787888|MFS transporter, NNP family, nitrate/nitrite transporter	GO:0016020//membrane	-	GO:0006810//transport	gi|15222118|ref|NP_172754.1|/2.11393e-32/nitrate transporter2.5 [Arabidopsis thaliana]
CL5616.Contig2_NAU-LB	289	0	49	0.01	32.6013	11.6707	Up	4.18522e-13	4.19193e-12	-	-	-	-	gi|89257447|gb|ABD64939.1|/3.04749e-31/hypothetical protein 24.t00017 [Brassica oleracea]
Unigene2339_NAU-LB	246	0	39	0.01	30.4836	11.5738	Up	1.43741e-10	1.19295e-09	K07374|1|4e-35|144|smo:SELMODRAFT_230058|tubulin alpha	GO:0032991//macromolecular complex;GO:0015630//microtubule cytoskeleton	GO:0017111//nucleoside-triphosphatase activity;GO:0032561//guanyl ribonucleotide binding	GO:0043623//cellular protein complex assembly;GO:0009207;GO:0007017//microtubule-based process	gi|326527899|dbj|BAJ89001.1|/3.28476e-41/predicted protein [Hordeum vulgare subsp. vulgare]
gnl|UG|Rsa#S42013335	773	0	122	0.01	30.347	11.5673	Up	1.28801e-31	2.87548e-30	-	GO:0009536//plastid	GO:0005488//binding	GO:0006950//response to stress	gi|297841831|ref|XP_002888797.1|/1.50154e-51/bet v I allergen family protein [Arabidopsis lyrata subsp. lyrata]
gi|332774489|gb|FY432136.1|FY432136	541	0	84	0.01	29.8551	11.5438	Up	5.5744e-22	8.88149e-21	-	-	-	-	-
Unigene7416_NAU-LB	230	0	34	0.01	28.4241	11.4729	Up	2.66386e-09	1.98847e-08	K08081|1|1e-20|96.3|ath:AT2G29150|tropine dehydrogenase [EC:1.1.1.206]	-	GO:0003824//catalytic activity	GO:0008152//metabolic process	gi|154623412|emb|CAO02390.1|/7.23266e-20/tropinone reductase [Cochlearia officinalis]
Unigene4644_NAU-LB	217	0	32	0.01	28.3548	11.4694	Up	8.56414e-09	6.07545e-08	K13692|1|6e-10|60.5|ath:AT1G05530|UDP-glucose:(indol-3-yl)acetate beta-D-glucosyltransferase [EC:2.4.1.121]	GO:0009536//plastid	GO:0005488//binding;GO:0035251//UDP-glucosyltransferase activity	GO:0009072//aromatic amino acid family metabolic process;GO:0010033//response to organic substance	gi|295854835|gb|ADG45874.1|/3.48984e-27/UDP-glucosyltransferase [Isatis tinctoria]
Unigene3676_NAU-LB	347	0	48	0.01	26.5979	11.3771	Up	7.50418e-13	7.39496e-12	K07375|1|4e-56|213|ppp:PHYPADRAFT_232451|tubulin beta	GO:0032991//macromolecular complex;GO:0015630//microtubule cytoskeleton	GO:0017111//nucleoside-triphosphatase activity;GO:0032561//guanyl ribonucleotide binding	GO:0043623//cellular protein complex assembly;GO:0009207;GO:0007017//microtubule-based process	gi|326509243|dbj|BAJ91538.1|/5.93396e-59/predicted protein [Hordeum vulgare subsp. vulgare]
CL8578.Contig2_NAU-LB	539	0	72	0.01	25.685	11.3267	Up	6.15508e-19	8.56457e-18	K13424|1|7e-12|68.2|osa:4338474|WRKY transcription factor 33;K13425|3|7e-12|68.2|rcu:RCOM_1616660|WRKY transcription factor 22	-	GO:0003677//DNA binding;GO:0001071//nucleic acid binding transcription factor activity	GO:0006351//transcription, DNA-dependent	gi|297812571|ref|XP_002874169.1|/1.61433e-64/hypothetical protein ARALYDRAFT_489268 [Arabidopsis lyrata subsp. lyrata]
Unigene22174_NAU-LB	505	0	64	0.01	24.3683	11.2508	Up	6.57542e-17	8.28846e-16	K12135|1|7e-08|54.7|aly:ARALYDRAFT_488429|zinc finger protein CONSTANS	GO:0044464//cell part	GO:0046914//transition metal ion binding;GO:0001071//nucleic acid binding transcription factor activity	GO:0006351//transcription, DNA-dependent;GO:0009743//response to carbohydrate stimulus;GO:0009411//response to UV	gi|297835186|ref|XP_002885475.1|/4.41035e-47/zinc finger (B-box type) family protein [Arabidopsis lyrata subsp. lyrata]
Unigene28525_NAU-LB	204	0	25	0.01	23.5638	11.2024	Up	5.10256e-07	2.993e-06	K00799|1|3e-17|84.7|gmx:547936|glutathione S-transferase [EC:2.5.1.18]	GO:0009532//plastid stroma;GO:0031090//organelle membrane	GO:0042277//peptide binding	GO:0009414//response to water deprivation;GO:0009404//toxin metabolic process;GO:0010038//response to metal ion	gi|2204102|emb|CAA74197.1|/8.45339e-21/glutathione-S-transferase [Brassica juncea]
gnl|UG|Rsa#S42026198	653	0	80	0.01	23.5566	11.2019	Up	5.7616e-21	8.80136e-20	-	GO:0005576//extracellular region;GO:0030312//external encapsulating structure	GO:0005488//binding	GO:0009725//response to hormone stimulus;GO:0006970//response to osmotic stress;GO:0051234//establishment of localization;GO:0010876//lipid localization	gi|20340231|gb|AAM19702.1|AF499715_1/1.94922e-49/lipid transfer protein 4-like protein [Eutrema halophilum]
CL2218.Contig2_NAU-LB	504	0	61	0.01	23.2721	11.1844	Up	3.79038e-16	4.56068e-15	-	-	-	-	gi|15231434|ref|NP_190229.1|/1.14842e-31/SEC14 cytosolic factor family protein / phosphoglyceride transfer family protein [Arabidopsis thaliana]
Unigene35_NAU-LB	253	0	30	0.01	22.8001	11.1548	Up	2.75332e-08	1.86857e-07	-	GO:0016020//membrane;GO:0043231//intracellular membrane-bounded organelle	-	GO:0007165//signal transduction	gi|13877685|gb|AAK43920.1|AF370601_1/1.05246e-31/Unknown protein [Arabidopsis thaliana]
Unigene2555_NAU-LB	542	0	63	0.01	22.35	11.1261	Up	1.17899e-16	1.46096e-15	-	GO:0043234//protein complex	GO:0004672//protein kinase activity;GO:0019787//small conjugating protein ligase activity;GO:0032559	GO:0050896//response to stimulus;GO:0032446//protein modification by small protein conjugation	gi|297824651|ref|XP_002880208.1|/8.2753e-28/hypothetical protein ARALYDRAFT_904044 [Arabidopsis lyrata subsp. lyrata]
Unigene22296_NAU-LB	226	0	26	0.01	22.1208	11.1112	Up	2.84578e-07	1.72833e-06	-	-	-	-	-
Unigene29828_NAU-LB	269	0	30	0.01	21.444	11.0664	Up	2.75332e-08	1.86902e-07	-	-	-	GO:0009628//response to abiotic stimulus	gi|312281469|dbj|BAJ33600.1|/3.23377e-20/unnamed protein product [Thellungiella halophila]
Unigene27356_NAU-LB	471	0	50	0.01	20.412	10.9952	Up	2.33416e-13	2.37862e-12	-	GO:0043231//intracellular membrane-bounded organelle	GO:0008194//UDP-glycosyltransferase activity	GO:0009832//plant-type cell wall biogenesis;GO:0010413//glucuronoxylan metabolic process	gi|42570324|ref|NP_850113.2|/1.59414e-71/exostosin-like protein [Arabidopsis thaliana]
Unigene22418_NAU-LB	342	0	36	0.01	20.2401	10.983	Up	8.28588e-10	6.43751e-09	-	-	GO:0016740//transferase activity	-	gi|295854835|gb|ADG45874.1|/1.70356e-13/UDP-glucosyltransferase [Isatis tinctoria]
CL6009.Contig1_NAU-LB	224	0	23	0.01	19.7431	10.9471	Up	1.64044e-06	9.08994e-06	K03231|1|2e-30|128|mtr:MTR_4g019170|elongation factor 1-alpha	GO:0044424//intracellular part	GO:0017111//nucleoside-triphosphatase activity;GO:0008135//translation factor activity, nucleic acid binding;GO:0032561//guanyl ribonucleotide binding	GO:0006412//translation;GO:0009207	gi|298711872|emb|CBJ32893.1|/2.74184e-32/EEF1A2, eukaryotic translation elongation factor 1 alpha [Ectocarpus siliculosus]
CL5178.Contig1_NAU-LB	730	0	73	0.01	19.2281	10.909	Up	3.43278e-19	4.82612e-18	-	-	GO:0003676//nucleic acid binding;GO:0001071//nucleic acid binding transcription factor activity	GO:0006351//transcription, DNA-dependent;GO:0032501//multicellular organismal process	gi|297828003|ref|XP_002881884.1|/6.17572e-105/ANAC042 [Arabidopsis lyrata subsp. lyrata]
Unigene18055_NAU-LB	270	0	27	0.01	19.2281	10.909	Up	1.58714e-07	9.92211e-07	-	GO:0016020//membrane	GO:0015197//peptide transporter activity;GO:0015603	GO:0022414//reproductive process;GO:0006810//transport;GO:0009791//post-embryonic development;GO:0010038//response to metal ion	gi|41352037|gb|AAS00691.1|/9.66909e-41/metal-nicotianamine transporter YSL1 [Arabidopsis thaliana]
Unigene1759_NAU-LB	211	0	21	0.01	19.137	10.9021	Up	5.2739e-06	2.73863e-05	-	-	-	-	gi|297807029|ref|XP_002871398.1|/4.76766e-08/hypothetical protein ARALYDRAFT_487822 [Arabidopsis lyrata subsp. lyrata]
Unigene22255_NAU-LB	573	0	56	0.01	18.7918	10.8759	Up	7.02446e-15	7.8489e-14	-	-	-	-	gi|116830207|gb|ABK28061.1|/1.41713e-27/unknown [Arabidopsis thaliana]
gi|161571011|gb|EY942234.1|EY942234	627	0	61	0.01	18.7068	10.8693	Up	3.79038e-16	4.55969e-15	K07213|1|2e-36|150|aly:ARALYDRAFT_486064|copper chaperone	GO:0009536//plastid;GO:0016020//membrane	GO:0035091//phosphatidylinositol binding;GO:0043565//sequence-specific DNA binding;GO:0005507//copper ion binding;GO:0016279//protein-lysine N-methyltransferase activity	GO:0009908//flower development;GO:0006351//transcription, DNA-dependent;GO:0030003//cellular cation homeostasis;GO:0034755//iron ion transmembrane transport;GO:0006970//response to osmotic stress;GO:0034968//histone lysine methylation;GO:0006979//response to oxidative stress	gi|312282829|dbj|BAJ34280.1|/2.64878e-36/unnamed protein product [Thellungiella halophila]
CL1989.Contig2_NAU-LB	371	0	36	0.01	18.658	10.8656	Up	8.28588e-10	6.43661e-09	-	GO:0031410//cytoplasmic vesicle	GO:0005488//binding	GO:0010876//lipid localization;GO:0009814//defense response, incompatible interaction	gi|297813783|ref|XP_002874775.1|/3.76556e-37/hypothetical protein ARALYDRAFT_490053 [Arabidopsis lyrata subsp. lyrata]
Unigene28676_NAU-LB	261	0	25	0.01	18.4177	10.8469	Up	5.10256e-07	2.99268e-06	-	GO:0043231//intracellular membrane-bounded organelle	GO:0008194//UDP-glycosyltransferase activity	GO:0009832//plant-type cell wall biogenesis;GO:0010413//glucuronoxylan metabolic process	gi|297822463|ref|XP_002879114.1|/4.83124e-37/hypothetical protein ARALYDRAFT_481698 [Arabidopsis lyrata subsp. lyrata]
Unigene25264_NAU-LB	283	0	26	0.01	17.6654	10.7867	Up	2.84578e-07	1.7289e-06	-	GO:0031224//intrinsic to membrane	GO:0015197//peptide transporter activity	GO:0010038//response to metal ion;GO:0000041//transition metal ion transport	gi|297808457|ref|XP_002872112.1|/1.05186e-39/hypothetical protein ARALYDRAFT_489303 [Arabidopsis lyrata subsp. lyrata]
gi|161546310|gb|EY918053.1|EY918053	579	0	53	0.01	17.6008	10.7814	Up	4.04922e-14	4.33369e-13	-	-	-	-	-
Unigene28340_NAU-LB	306	0	27	0.01	16.966	10.7284	Up	1.58714e-07	9.91765e-07	K07374|1|6e-20|93.6|ota:Ot08g03630|tubulin alpha	GO:0032991//macromolecular complex;GO:0015630//microtubule cytoskeleton	GO:0017111//nucleoside-triphosphatase activity;GO:0032561//guanyl ribonucleotide binding	GO:0043623//cellular protein complex assembly;GO:0009207;GO:0007017//microtubule-based process	gi|428183889|gb|EKX52746.1|/1.03692e-18/hypothetical protein GUITHDRAFT_150645 [Guillardia theta CCMP2712]
Unigene2582_NAU-LB	344	0	30	0.01	16.7687	10.7116	Up	2.75332e-08	1.86879e-07	-	-	GO:0016740//transferase activity	-	gi|297833814|ref|XP_002884789.1|/1.73656e-50/hypothetical protein ARALYDRAFT_478362 [Arabidopsis lyrata subsp. lyrata]
CL6301.Contig1_NAU-LB	782	0	64	0.01	15.7365	10.6199	Up	6.57542e-17	8.28658e-16	K03627|1|5e-73|272|ath:AT3G24500|putative transcription factor	GO:0031981//nuclear lumen	GO:0003712//transcription cofactor activity;GO:0001071//nucleic acid binding transcription factor activity;GO:0003677//DNA binding	GO:0000160//two-component signal transduction system (phosphorelay);GO:0009725//response to hormone stimulus;GO:0006355//regulation of transcription, DNA-dependent;GO:0006950//response to stress	gi|15230125|ref|NP_189093.1|/5.99398e-72/multiprotein-bridging factor 1c [Arabidopsis thaliana]
gnl|UG|Rsa#S42031769	648	0	51	0.01	15.1332	10.5635	Up	1.3018e-13	1.3491e-12	K14445|1|2e-61|233|aly:ARALYDRAFT_494217|solute carrier family 13 (sodium-dependent dicarboxylate transporter), member 2/3/5	GO:0043231//intracellular membrane-bounded organelle	GO:0015556//C4-dicarboxylate transmembrane transporter activity	GO:0015743//malate transport;GO:0030641//regulation of cellular pH;GO:0030001//metal ion transport	gi|89257507|gb|ABD64997.1|/1.14734e-61/sodium-dicarboxylate cotransporter, putative [Brassica oleracea]
Unigene19650_NAU-LB	852	0	65	0.01	14.6693	10.5186	Up	3.66722e-17	4.67134e-16	K08234|1|4e-10|63.5|cre:CHLREDRAFT_143257|glyoxylase I family protein	-	GO:0003824//catalytic activity	-	gi|5902371|gb|AAD55473.1|AC009322_13/2.91263e-86/Hypothetical protein [Arabidopsis thaliana]
Unigene30414_NAU-LB	265	0	20	0.01	14.5118	10.503	Up	9.45624e-06	4.76317e-05	K02941|1|8e-26|113|bdi:100835745|large subunit ribosomal protein LP0	GO:0030529//ribonucleoprotein complex	GO:0016829//lyase activity;GO:0005198//structural molecule activity	GO:0006412//translation	gi|449455034|ref|XP_004145258.1|/4.37446e-25/PREDICTED: 60S acidic ribosomal protein P0-2-like [Cucumis sativus]
Unigene16053_NAU-LB	305	0	23	0.01	14.4999	10.5018	Up	1.64044e-06	9.09176e-06	-	-	-	-	gi|15223920|ref|NP_172940.1|/2.31538e-10/cadmium resistance protein 2 [Arabidopsis thaliana]
Unigene14287_NAU-LB	239	0	18	0.01	14.4814	10.5	Up	3.04012e-05	0.000141444	-	-	-	-	-
Unigene26335_NAU-LB	257	0	19	0.01	14.2153	10.4732	Up	1.69553e-05	8.24175e-05	-	-	-	-	gi|297813783|ref|XP_002874775.1|/9.52491e-09/hypothetical protein ARALYDRAFT_490053 [Arabidopsis lyrata subsp. lyrata]
Unigene5820_NAU-LB	298	0	22	0.01	14.1952	10.4712	Up	2.94134e-06	1.58023e-05	K13420|1|3e-08|54.7|ath:AT5G46330|LRR receptor-like serine/threonine-protein kinase FLS2 [EC:2.7.11.1];K13415|2|1e-07|52.8|aly:ARALYDRAFT_912402|protein brassinosteroid insensitive 1 [EC:2.7.10.1 2.7.11.1]	GO:0044464//cell part	GO:0016772//transferase activity, transferring phosphorus-containing groups	GO:0002218//activation of innate immune response;GO:0023052//signaling	gi|4115376|gb|AAD03377.1|/4.06871e-36/putative disease resistance protein [Arabidopsis thaliana]
Unigene29702_NAU-LB	247	0	18	0.01	14.0124	10.4525	Up	3.04012e-05	0.000141479	-	-	-	-	gi|300122042|emb|CBK22616.2|/9.00022e-07/unnamed protein product [Blastocystis hominis]
Unigene3461_NAU-LB	387	0	28	0.01	13.9118	10.4421	Up	8.85174e-08	5.6787e-07	-	-	-	-	gi|11994658|dbj|BAB02886.1|/1.78191e-23/unnamed protein product [Arabidopsis thaliana]
Unigene7215_NAU-LB	251	0	18	0.01	13.7891	10.4293	Up	3.04012e-05	0.000141408	-	GO:0005576//extracellular region;GO:0030312//external encapsulating structure	GO:0004553//hydrolase activity, hydrolyzing O-glycosyl compounds;GO:0043167//ion binding	GO:0044238//primary metabolic process;GO:0051707//response to other organism	gi|312281527|dbj|BAJ33629.1|/2.20472e-13/unnamed protein product [Thellungiella halophila]
Unigene24019_NAU-LB	265	0	19	0.01	13.7862	10.429	Up	1.69553e-05	8.24103e-05	-	GO:0016020//membrane	GO:0004672//protein kinase activity;GO:0032559	GO:0006464//cellular protein modification process	gi|297803800|ref|XP_002869784.1|/2.64866e-27/hypothetical protein ARALYDRAFT_492546 [Arabidopsis lyrata subsp. lyrata]
Unigene2919_NAU-LB	321	0	22	0.01	13.1781	10.3639	Up	2.94134e-06	1.58038e-05	K13420|1|6e-07|50.4|rcu:RCOM_0633880|LRR receptor-like serine/threonine-protein kinase FLS2 [EC:2.7.11.1];K13415|2|6e-07|50.4|pop:POPTR_650846|protein brassinosteroid insensitive 1 [EC:2.7.10.1 2.7.11.1]	-	-	GO:0023052//signaling	gi|297805672|ref|XP_002870720.1|/5.58198e-25/hypothetical protein ARALYDRAFT_493970 [Arabidopsis lyrata subsp. lyrata]
gi|161547505|gb|EY920184.1|EY920184	809	0	55	0.01	13.0722	10.3523	Up	1.2595e-14	1.38698e-13	-	-	GO:0005488//binding	GO:0050896//response to stimulus	gi|18395206|ref|NP_564190.1|/1.97706e-49/polyketide cyclase/dehydrase and lipid transport-like protein [Arabidopsis thaliana]
gnl|UG|Rsa#S43014459	839	0	56	0.01	12.834	10.3258	Up	7.02446e-15	7.85048e-14	K00799|1|4e-98|355|aly:ARALYDRAFT_671724|glutathione S-transferase [EC:2.5.1.18]	GO:0044424//intracellular part	GO:0016740//transferase activity	GO:0009404//toxin metabolic process;GO:0010038//response to metal ion	gi|297833686|ref|XP_002884725.1|/4.64107e-97/predicted protein [Arabidopsis lyrata subsp. lyrata]
Unigene23334_NAU-LB	403	0	26	0.01	12.4052	10.2767	Up	2.84578e-07	1.72871e-06	-	-	-	-	gi|297797972|ref|XP_002866870.1|/4.1709e-20/predicted protein [Arabidopsis lyrata subsp. lyrata]
CL1030.Contig3_NAU-LB	266	0	17	0.01	12.2886	10.2631	Up	5.45102e-05	0.000242569	K13416|1|9e-12|66.6|rcu:RCOM_1534760|brassinosteroid insensitive 1-associated receptor kinase 1 [EC:2.7.10.1 2.7.11.1];K13417|2|1e-11|66.2|ath:AT2G13790|somatic embryogenesis receptor kinase 4 [EC:2.7.10.1 2.7.11.1]	GO:0044464//cell part	GO:0030246//carbohydrate binding;GO:0004713//protein tyrosine kinase activity;GO:0032559	GO:0006464//cellular protein modification process;GO:0008037//cell recognition	gi|166846|gb|AAA32857.1|/4.81415e-40/receptor-like protein kinase [Arabidopsis thaliana]
Unigene30074_NAU-LB	252	0	16	0.01	12.2083	10.2536	Up	9.7738e-05	0.000419808	K05692|1|1e-44|176|smo:SELMODRAFT_175956|actin beta/gamma 1;K12313|2|1e-44|176|zma:100274491|actin, aortic smooth muscle	GO:0043232	GO:0032559	-	gi|116222095|gb|ABJ80918.1|/1.41586e-44/actin, partial [Leucocryptos marina]
gnl|UG|Rsa#S41984178	684	0	42	0.01	11.8067	10.2054	Up	2.49356e-11	2.20163e-10	-	-	-	-	gi|15232353|ref|NP_191611.1|/2.18638e-53/uncharacterized protein [Arabidopsis thaliana]
gi|332785741|gb|FY444673.1|FY444673	587	0	35	0.01	11.4648	10.163	Up	1.48568e-09	1.13257e-08	K13423|1|2e-26|116|aly:ARALYDRAFT_481938|WRKY transcription factor 25;K13424|5|4e-24|108|sbi:SORBI_03g038510|WRKY transcription factor 33	GO:0043231//intracellular membrane-bounded organelle	GO:0001071//nucleic acid binding transcription factor activity;GO:0003677//DNA binding	GO:0031667//response to nutrient levels;GO:0006355//regulation of transcription, DNA-dependent;GO:0048528//post-embryonic root development	gi|206575001|gb|ACI14409.1|/7.81648e-77/WRKY75-1 transcription factor [Brassica napus]
CL429.Contig4_NAU-LB	948	0	56	0.01	11.3584	10.1495	Up	7.02446e-15	7.85206e-14	K13030|1|6e-69|259|sbi:SORBI_01g001220|cyanohydrin beta-glucosyltransferase [EC:2.4.1.85];K13691|2|2e-48|191|vvi:100242294|pathogen-inducible salicylic acid glucosyltransferase [EC:2.4.1.-]	-	GO:0035251//UDP-glucosyltransferase activity	-	gi|54292902|gb|AAV32497.1|/4.43246e-134/UDP-glucuronosyltransferase [Arabidopsis thaliana]
Unigene1537_NAU-LB	306	0	18	0.01	11.3106	10.1435	Up	3.04012e-05	0.000141468	K14445|1|2e-50|195|ath:AT5G47560|solute carrier family 13 (sodium-dependent dicarboxylate transporter), member 2/3/5	GO:0043231//intracellular membrane-bounded organelle	GO:0015556//C4-dicarboxylate transmembrane transporter activity	GO:0015743//malate transport;GO:0030641//regulation of cellular pH;GO:0030001//metal ion transport	gi|89257480|gb|ABD64971.1|/1.20952e-51/sodium-dependent transporter family protein [Brassica oleracea]
Unigene24432_NAU-LB	1050	0	61	0.01	11.1706	10.1255	Up	3.79038e-16	4.55871e-15	-	GO:0044444//cytoplasmic part;GO:0043231//intracellular membrane-bounded organelle	-	-	gi|15232103|ref|NP_189351.1|/2.23688e-121/F-box/kelch-repeat protein [Arabidopsis thaliana]
CL1283.Contig3_NAU-LB	306	0	17	0.01	10.6823	10.061	Up	5.45102e-05	0.000242607	K13692|1|2e-23|105|ath:AT1G05560|UDP-glucose:(indol-3-yl)acetate beta-D-glucosyltransferase [EC:2.4.1.121]	GO:0009536//plastid	GO:0005488//binding;GO:0035251//UDP-glucosyltransferase activity	GO:0000919//cell plate assembly;GO:0009072//aromatic amino acid family metabolic process;GO:0010033//response to organic substance	gi|297800626|ref|XP_002868197.1|/1.88097e-36/indole-3-acetate beta-D-glucosyltransferase [Arabidopsis lyrata subsp. lyrata]
gi|167481748|gb|FD969840.1|FD969840	600	0	33	0.01	10.5754	10.0465	Up	4.77636e-09	3.47348e-08	-	GO:0043231//intracellular membrane-bounded organelle	GO:0004871//signal transducer activity	GO:0010647//positive regulation of cell communication;GO:0009267//cellular response to starvation	gi|297808083|ref|XP_002871925.1|/5.16223e-71/SPX domain-containing protein [Arabidopsis lyrata subsp. lyrata]
CL3872.Contig2_NAU-LB	282	0	15	0.01	10.2277	9.99827	Up	0.000175247	0.000723007	-	-	-	-	gi|186504360|ref|NP_001118419.1|/2.37286e-07/uncharacterized protein [Arabidopsis thaliana]
gi|167483537|gb|FD968507.1|FD968507	653	0	34	0.01	10.0116	9.96745	Up	2.66386e-09	1.9882e-08	-	-	-	-	gi|8954058|gb|AAF82231.1|AC069143_7/4.92745e-20/Contains similarity to a hypothetical protein F9E10.21 gi|6646770 from Arabidopsis thaliana BAC F9E10 gb|AC013258 [Arabidopsis thaliana]
Unigene28916_NAU-LB	347	0	18	0.01	9.97422	9.96206	Up	3.04012e-05	0.000141491	-	GO:0043231//intracellular membrane-bounded organelle	GO:0008194//UDP-glycosyltransferase activity	GO:0009832//plant-type cell wall biogenesis;GO:0010413//glucuronoxylan metabolic process	gi|297822463|ref|XP_002879114.1|/2.33346e-55/hypothetical protein ARALYDRAFT_481698 [Arabidopsis lyrata subsp. lyrata]
gi|332771337|gb|FY429612.1|FY429612	582	0	30	0.01	9.91139	9.95294	Up	2.75332e-08	1.86925e-07	-	-	-	-	gi|297850330|ref|XP_002893046.1|/2.91331e-52/hypothetical protein ARALYDRAFT_472167 [Arabidopsis lyrata subsp. lyrata]
gi|166100110|gb|FD531963.1|FD531963	860	0	44	0.01	9.83763	9.94217	Up	7.7562e-12	7.14905e-11	K00799|1|1e-66|251|aly:ARALYDRAFT_901907|glutathione S-transferase [EC:2.5.1.18]	GO:0044424//intracellular part	GO:0016829//lyase activity;GO:0016765//transferase activity, transferring alkyl or aryl (other than methyl) groups	GO:0009404//toxin metabolic process;GO:0010033//response to organic substance	gi|158578615|gb|ABW74586.1|/1.11536e-101/glutathione-S-transferase [Boechera divaricarpa]
Unigene25009_NAU-LB	373	0	19	0.01	9.79447	9.93582	Up	1.69553e-05	8.2432e-05	K00517|1|3e-58|221|ath:AT4G37310|[EC:1.14.-.-]	GO:0044464//cell part	GO:0016491//oxidoreductase activity;GO:0005506//iron ion binding	GO:0008152//metabolic process	gi|297798146|ref|XP_002866957.1|/1.1219e-57/CYP81H1 [Arabidopsis lyrata subsp. lyrata]
CL5304.Contig4_NAU-LB	826	0	42	0.01	9.77699	9.93325	Up	2.49356e-11	2.20198e-10	-	GO:0043231//intracellular membrane-bounded organelle	-	GO:0050896//response to stimulus	gi|312281613|dbj|BAJ33672.1|/1.90873e-79/unnamed protein product [Thellungiella halophila]
gnl|UG|Rsa#S43029433	794	0	40	0.01	9.68669	9.91986	Up	8.01666e-11	6.78809e-10	K09753|1|2e-56|215|pop:POPTR_813757|cinnamoyl-CoA reductase [EC:1.2.1.44]	GO:0044464//cell part	GO:0048037//cofactor binding;GO:0016616//oxidoreductase activity, acting on the CH-OH group of donors, NAD or NADP as acceptor	GO:0009699//phenylpropanoid biosynthetic process	gi|227325769|gb|ACP20258.1|/1.66027e-109/cinnamyl-alcohol dehydrogenase [Brassica rapa subsp. campestris]
gi|154091734|gb|EV524707.1|EV524707	505	0	25	0.01	9.51886	9.89464	Up	5.10256e-07	2.99363e-06	-	-	-	GO:0009628//response to abiotic stimulus	gi|297796691|ref|XP_002866230.1|/3.59493e-12/hypothetical protein ARALYDRAFT_918959 [Arabidopsis lyrata subsp. lyrata]
Unigene26736_NAU-LB	346	0	17	0.01	9.44733	9.88376	Up	5.45102e-05	0.00024253	-	GO:0009534//chloroplast thylakoid	GO:0070011//peptidase activity, acting on L-amino acid peptides	GO:0019538//protein metabolic process;GO:0007165//signal transduction	gi|297817096|ref|XP_002876431.1|/3.72542e-53/peptidase S41 family protein [Arabidopsis lyrata subsp. lyrata]
Unigene22671_NAU-LB	328	0	16	0.01	9.37956	9.87338	Up	9.7738e-05	0.000419841	-	-	-	-	-
Unigene29952_NAU-LB	412	0	20	0.01	9.33402	9.86636	Up	9.45624e-06	4.7636e-05	-	GO:0009536//plastid	-	GO:0023052//signaling	gi|4455311|emb|CAB36846.1|/1.90444e-25/putative disease resistance protein [Arabidopsis thaliana]
gnl|UG|Rsa#S42047962	537	0	26	0.01	9.30969	9.86259	Up	2.84578e-07	1.72814e-06	-	-	-	-	gi|297848804|ref|XP_002892283.1|/6.42219e-21/hypothetical protein ARALYDRAFT_470534 [Arabidopsis lyrata subsp. lyrata]
Unigene28444_NAU-LB	311	0	15	0.01	9.274	9.85705	Up	0.000175247	0.000723329	-	-	-	-	-
Unigene25801_NAU-LB	354	0	17	0.01	9.23383	9.85079	Up	5.45102e-05	0.000242588	-	-	-	-	-
Unigene3101_NAU-LB	463	0	22	0.01	9.13646	9.83549	Up	2.94134e-06	1.58053e-05	K15102|1|2e-51|199|aly:ARALYDRAFT_906139|solute carrier family 25 (mitochondrial phosphate transporter), member 3	GO:0019866//organelle inner membrane;GO:0031224//intrinsic to membrane;GO:0030312//external encapsulating structure;GO:0009536//plastid	GO:0005488//binding	GO:0006810//transport	gi|297819502|ref|XP_002877634.1|/1.9295e-50/hypothetical protein ARALYDRAFT_906139 [Arabidopsis lyrata subsp. lyrata]
Unigene27913_NAU-LB	346	0	16	0.01	8.8916	9.7963	Up	9.7738e-05	0.000419711	K12135|1|1e-14|76.3|aly:ARALYDRAFT_488429|zinc finger protein CONSTANS	-	GO:0005488//binding	GO:0009908//flower development	gi|11037313|gb|AAG27548.1|/1.68394e-29/COL2-like protein [Brassica nigra]
CL2319.Contig6_NAU-LB	469	0	20	0.01	8.19961	9.67941	Up	9.45624e-06	4.76446e-05	-	GO:0031981//nuclear lumen	GO:0003676//nucleic acid binding	-	gi|297809519|ref|XP_002872643.1|/8.76767e-62/DNA-binding family protein [Arabidopsis lyrata subsp. lyrata]
gi|332783150|gb|FY440458.1|FY440458	681	0	29	0.01	8.18817	9.6774	Up	4.93676e-08	3.2427e-07	-	GO:0044464//cell part	-	-	gi|297830156|ref|XP_002882960.1|/5.50798e-57/predicted protein [Arabidopsis lyrata subsp. lyrata]
gi|156159591|gb|EW719737.1|EW719737	424	0	18	0.01	8.16287	9.67293	Up	3.04012e-05	0.000141432	-	-	-	-	-
gi|154182878|gb|EV552218.1|EV552218	578	0	24	0.01	7.98398	9.64096	Up	9.149e-07	5.2125e-06	-	-	-	-	gi|15231223|ref|NP_190159.1|/2.7218e-10/uncharacterized protein [Arabidopsis thaliana]
gi|332770777|gb|FY432950.1|FY432950	899	0	37	0.01	7.91367	9.6282	Up	4.62118e-10	3.67191e-09	-	GO:0043231//intracellular membrane-bounded organelle	GO:0003676//nucleic acid binding;GO:0042802//identical protein binding;GO:0001071//nucleic acid binding transcription factor activity;GO:0046983//protein dimerization activity	GO:0006970//response to osmotic stress;GO:0007165//signal transduction;GO:0006351//transcription, DNA-dependent;GO:0010260//organ senescence	gi|15241819|ref|NP_198777.1|/2.30606e-129/NAC domain containing protein 6 [Arabidopsis thaliana]
gi|158638852|gb|EX748743.1|EX748743	694	0	27	0.01	7.48067	9.54702	Up	1.58714e-07	9.91876e-07	-	GO:0043231//intracellular membrane-bounded organelle	-	GO:0006950//response to stress	gi|5360792|dbj|BAA82151.1|/1.83136e-55/myrosinase binding protein [Arabidopsis thaliana]
Unigene23059_NAU-LB	415	0	16	0.01	7.41324	9.53396	Up	9.7738e-05	0.000419938	-	-	GO:0022857//transmembrane transporter activity	GO:0006810//transport;GO:0009987//cellular process	gi|15242423|ref|NP_196509.1|/1.15807e-14/dicarboxylate carrier 3 [Arabidopsis thaliana]
gi|161514561|gb|EY894504.1|EY894504	390	0	15	0.01	7.39542	9.53049	Up	0.000175247	0.000722846	-	GO:0043231//intracellular membrane-bounded organelle	GO:0001071//nucleic acid binding transcription factor activity;GO:0046983//protein dimerization activity	GO:0006950//response to stress;GO:0010467//gene expression;GO:0007165//signal transduction	gi|15228570|ref|NP_189546.1|/1.83774e-07/NAC domain-containing protein 3 [Arabidopsis thaliana]
gnl|UG|Rsa#S42008592	862	0	33	0.01	7.3611	9.52378	Up	4.77636e-09	3.47303e-08	K00799|1|1e-66|251|gmx:547936|glutathione S-transferase [EC:2.5.1.18]	GO:0009532//plastid stroma;GO:0031090//organelle membrane	GO:0042277//peptide binding;GO:0016829//lyase activity;GO:0016740//transferase activity	GO:0070887//cellular response to chemical stimulus;GO:0010038//response to metal ion;GO:0009414//response to water deprivation;GO:0009404//toxin metabolic process	gi|297844652|ref|XP_002890207.1|/2.50582e-93/hypothetical protein ARALYDRAFT_471920 [Arabidopsis lyrata subsp. lyrata]
gi|156171505|gb|EW731651.1|EW731651	707	0	27	0.01	7.34312	9.52025	Up	1.58714e-07	9.91988e-07	K12135|1|3e-08|57.0|aly:ARALYDRAFT_488429|zinc finger protein CONSTANS	GO:0043231//intracellular membrane-bounded organelle	GO:0003676//nucleic acid binding;GO:0046914//transition metal ion binding;GO:0001071//nucleic acid binding transcription factor activity;GO:0005515//protein binding	GO:0006970//response to osmotic stress;GO:0006351//transcription, DNA-dependent;GO:0009639//response to red or far red light	gi|18402646|ref|NP_565722.1|/2.08389e-78/Salt tolerance-like protein [Arabidopsis thaliana]
CL7210.Contig2_NAU-LB	426	0	16	0.01	7.22182	9.49622	Up	9.7738e-05	0.00041997	-	-	GO:0003676//nucleic acid binding;GO:0001071//nucleic acid binding transcription factor activity	GO:0009851//auxin biosynthetic process;GO:0048511//rhythmic process;GO:0009755//hormone-mediated signaling pathway;GO:0006351//transcription, DNA-dependent	gi|42567912|ref|NP_568344.2|/5.61384e-41/myb family transcription factor [Arabidopsis thaliana]
gi|154099328|gb|EV532301.1|EV532301	856	0	31	0.01	6.96344	9.44366	Up	1.53557e-08	1.06581e-07	-	GO:0044464//cell part	-	-	gi|297853590|ref|XP_002894676.1|/1.26537e-105/hypothetical protein ARALYDRAFT_474842 [Arabidopsis lyrata subsp. lyrata]
gi|154181608|gb|EV550948.1|EV550948	474	0	17	0.01	6.89615	9.42965	Up	5.45102e-05	0.000242646	-	GO:0043231//intracellular membrane-bounded organelle	-	GO:0048513//organ development	gi|145361828|ref|NP_850631.2|/1.87669e-14/protein rotundifolia like 16 [Arabidopsis thaliana]
gi|158918732|gb|EX891268.1|EX891268	753	0	27	0.01	6.89453	9.42931	Up	1.58714e-07	9.921e-07	-	-	-	-	gi|21554913|gb|AAM63728.1|/2.61267e-29/unknown [Arabidopsis thaliana]
gnl|UG|Rsa#S42585422	661	0	22	0.01	6.39967	9.32185	Up	2.94134e-06	1.58069e-05	K14508|1|3e-29|126|aly:ARALYDRAFT_474924|regulatory protein NPR1	-	-	GO:0009743//response to carbohydrate stimulus	gi|15236116|ref|NP_194342.1|/8.05387e-42/ankyrin repeat and BTB/POZ domain-containing protein [Arabidopsis thaliana]
gi|154169589|gb|EV540863.1|EV540863	850	0	28	0.01	6.33396	9.30696	Up	8.85174e-08	5.67804e-07	-	GO:0044464//cell part	-	-	gi|30680708|ref|NP_192570.2|/6.88949e-88/nodulin MtN21 /EamA-like transporter family protein [Arabidopsis thaliana]
gi|158659157|gb|EX769048.1|EX769048	689	0	21	0.01	5.86052	9.19488	Up	5.2739e-06	2.73889e-05	-	GO:0016020//membrane	GO:0004091//carboxylesterase activity	-	gi|30695682|ref|NP_191845.2|/2.76118e-72/esterase/lipase/thioesterase family protein [Arabidopsis thaliana]
gi|158914924|gb|EX886723.1|EX886723	661	0	20	0.01	5.81788	9.18435	Up	9.45624e-06	4.76489e-05	K09753|1|2e-44|177|pop:POPTR_813757|cinnamoyl-CoA reductase [EC:1.2.1.44]	GO:0044464//cell part	GO:0048037//cofactor binding;GO:0016616//oxidoreductase activity, acting on the CH-OH group of donors, NAD or NADP as acceptor	GO:0009699//phenylpropanoid biosynthetic process	gi|227325767|gb|ACP20257.1|/5.70775e-109/cinnamyl-alcohol dehydrogenase [Brassica rapa subsp. campestris]
gi|332776224|gb|FY428308.1|FY428308	834	0	25	0.01	5.76382	9.17088	Up	5.10256e-07	2.99331e-06	K01809|1|3e-112|402|aly:ARALYDRAFT_676181|mannose-6-phosphate isomerase [EC:5.3.1.8]	-	GO:0046914//transition metal ion binding;GO:0016861//intramolecular oxidoreductase activity, interconverting aldoses and ketoses	GO:0019852//L-ascorbic acid metabolic process;GO:0003006//developmental process involved in reproduction;GO:0044238//primary metabolic process	gi|339721493|gb|AEJ89929.1|/1.62119e-134/mannose-6-phosphate isomerase-like protein [Brassica rapa subsp. chinensis]
gnl|UG|Rsa#S42036001	681	0	19	0.01	5.36466	9.06734	Up	1.69553e-05	8.24248e-05	-	-	-	GO:0009987//cellular process;GO:0023052//signaling	gi|145329579|ref|NP_001077939.1|/6.81158e-15/protein RALF-like 15 [Arabidopsis thaliana]
gi|167500852|gb|FD985755.1|FD985755	558	0	15	0.01	5.16884	9.0137	Up	0.000175247	0.000723222	-	GO:0009536//plastid	-	GO:0006950//response to stress	gi|297793471|ref|XP_002864620.1|/8.86906e-32/hypothetical protein ARALYDRAFT_496048 [Arabidopsis lyrata subsp. lyrata]
gi|158945328|gb|EX907868.1|EX907868	699	0	18	0.01	4.95144	8.9517	Up	3.04012e-05	0.00014142	K01626|1|1e-81|300|aly:ARALYDRAFT_472481|3-deoxy-7-phosphoheptulonate synthase [EC:2.5.1.54]	GO:0009536//plastid	GO:0016765//transferase activity, transferring alkyl or aryl (other than methyl) groups	GO:0008652//cellular amino acid biosynthetic process	gi|297845258|ref|XP_002890510.1|/1.28237e-80/hypothetical protein ARALYDRAFT_472481 [Arabidopsis lyrata subsp. lyrata]
CL1274.Contig1_NAU-LB	590	0	15	0.01	4.8885	8.93325	Up	0.000175247	0.0007229	-	GO:0044464//cell part	-	-	gi|297830156|ref|XP_002882960.1|/1.20535e-08/predicted protein [Arabidopsis lyrata subsp. lyrata]
gi|167443017|gb|FD949130.1|FD949130	797	0	20	0.01	4.82512	8.91442	Up	9.45624e-06	4.76403e-05	K03152|1|4e-119|335|aly:ARALYDRAFT_478924|4-methyl-5(b-hydroxyethyl)-thiazole monophosphate biosynthesis	GO:0031090//organelle membrane;GO:0009536//plastid	-	GO:0006772//thiamine metabolic process;GO:0010038//response to metal ion	gi|297830048|ref|XP_002882906.1|/4.65714e-118/hypothetical protein ARALYDRAFT_478924 [Arabidopsis lyrata subsp. lyrata]
CL3783.Contig3_NAU-LB	692	0	17	0.01	4.72366	8.88376	Up	5.45102e-05	0.000242627	-	-	-	-	-
gi|154170960|gb|EV542234.1|EV542234	856	0	21	0.01	4.71717	8.88178	Up	5.2739e-06	2.73838e-05	K15638|1|2e-63|240|ath:AT1G17060|cytochrome P450, family 72, subfamily C, polypeptide 1;K15639|3|6e-56|215|aly:ARALYDRAFT_901457|cytochrome P450, family 734, subfamily A, polypeptide 1 (PHYB activation tagged suppressor 1) [EC:1.14.-.-];K10717|5|1e-55|214|ath:AT1G67110|cytokinin trans-hydroxylase	GO:0043231//intracellular membrane-bounded organelle	GO:0016491//oxidoreductase activity;GO:0005506//iron ion binding	GO:0008152//metabolic process	gi|297830012|ref|XP_002882888.1|/3.31452e-122/CYP72A15 [Arabidopsis lyrata subsp. lyrata]
gi|161576694|gb|EY948106.1|EY948106	756	0	18	0.01	4.57812	8.83861	Up	3.04012e-05	0.000141503	K12135|1|4e-15|79.7|aly:ARALYDRAFT_488429|zinc finger protein CONSTANS	GO:0043231//intracellular membrane-bounded organelle	GO:0003676//nucleic acid binding;GO:0046914//transition metal ion binding;GO:0001071//nucleic acid binding transcription factor activity;GO:0005515//protein binding	GO:0006970//response to osmotic stress;GO:0006351//transcription, DNA-dependent;GO:0009639//response to red or far red light	gi|18402646|ref|NP_565722.1|/5.77144e-85/Salt tolerance-like protein [Arabidopsis thaliana]
gnl|UG|Rsa#S43006978	676	0	16	0.01	4.55103	8.83005	Up	9.7738e-05	0.000419776	K13496|1|5e-36|149|aly:ARALYDRAFT_485691|UDP-glucosyl transferase 73C [EC:2.4.1.-]	GO:0044464//cell part	GO:0035251//UDP-glucosyltransferase activity	GO:0009607//response to biotic stimulus;GO:0051553	gi|297798502|ref|XP_002867135.1|/3.77841e-58/predicted protein [Arabidopsis lyrata subsp. lyrata]
gnl|UG|Rsa#S41977035	852	0	20	0.01	4.51364	8.81815	Up	9.45624e-06	4.76532e-05	K13229|1|6e-43|99.8|zma:541977|2,4-dihydroxy-1,4-benzoxazin-3-one-glucoside dioxygenase [EC:1.14.20.2];K00475|4|6e-17|86.3|aly:ARALYDRAFT_485476|naringenin 3-dioxygenase [EC:1.14.11.9]	-	GO:0016641//oxidoreductase activity, acting on the CH-NH2 group of donors, oxygen as acceptor;GO:0016706//oxidoreductase activity, acting on paired donors, with incorporation or reduction of molecular oxygen, 2-oxoglutarate as one donor, and incorporation of one atom each of oxygen into both donors	GO:0008152//metabolic process	gi|75311560|sp|Q9LTH8.1|ACH11_ARATH/1.05671e-111/RecName: Full=1-aminocyclopropane-1-carboxylate oxidase homolog 11
gi|154261440|gb|EV572411.1|EV572411	811	0	19	0.01	4.50473	8.8153	Up	1.69553e-05	8.24392e-05	K01738|1|1e-87|320|ath:AT5G28020|cysteine synthase A [EC:2.5.1.47]	-	GO:0016835//carbon-oxygen lyase activity;GO:0016740//transferase activity;GO:0048037//cofactor binding	GO:0006563//L-serine metabolic process;GO:0000097//sulfur amino acid biosynthetic process	gi|79328905|ref|NP_001031958.1|/1.54846e-86/cysteine synthase D2 [Arabidopsis thaliana]
gi|154177474|gb|EV546815.1|EV546815	817	0	19	0.01	4.47165	8.80466	Up	1.69553e-05	8.24464e-05	-	GO:0043231//intracellular membrane-bounded organelle	-	GO:0010647//positive regulation of cell communication;GO:0009267//cellular response to starvation	gi|297808083|ref|XP_002871925.1|/1.61684e-99/SPX domain-containing protein [Arabidopsis lyrata subsp. lyrata]
gi|161573654|gb|EY944641.1|EY944641	664	0	15	0.01	4.34369	8.76278	Up	0.000175247	0.000723168	-	-	-	-	gi|18400638|ref|NP_566501.1|/1.98968e-64/uncharacterized protein [Arabidopsis thaliana]
gi|161530658|gb|EY902717.1|EY902717	717	0	16	0.01	4.29079	8.7451	Up	9.7738e-05	0.000420003	K14709|1|2e-69|259|ath:AT1G05300|solute carrier family 39 (zinc transporter), member 1/2/3	GO:0031224//intrinsic to membrane	GO:0046915//transition metal ion transmembrane transporter activity	GO:0006829//zinc ion transport	gi|15220470|ref|NP_172022.1|/2.62049e-68/zinc transporter 5 [Arabidopsis thaliana]
CL2930.Contig1_NAU-LB	1174	0	26	0.01	4.25835	8.73415	Up	2.84578e-07	1.72852e-06	-	-	-	-	gi|312283413|dbj|BAJ34572.1|/2.62122e-129/unnamed protein product [Thellungiella halophila]
Unigene8186_NAU-LB	1063	1	535	0.228095	96.7735	8.72883	Up	5.69496e-134	5.10608e-132	-	GO:0009536//plastid	-	-	gi|79350419|ref|NP_173724.2|/8.39816e-124/uncharacterized protein [Arabidopsis thaliana]
gnl|UG|Rsa#S41974854	1007	0	22	0.01	4.20077	8.71451	Up	2.94134e-06	1.58084e-05	K03152|1|6e-57|137|aly:ARALYDRAFT_478924|4-methyl-5(b-hydroxyethyl)-thiazole monophosphate biosynthesis	GO:0031090//organelle membrane;GO:0009536//plastid	-	GO:0006772//thiamine metabolic process;GO:0010038//response to metal ion	gi|297830048|ref|XP_002882906.1|/8.29382e-56/hypothetical protein ARALYDRAFT_478924 [Arabidopsis lyrata subsp. lyrata]
Unigene5669_NAU-LB	712	0	15	0.01	4.05086	8.66208	Up	0.000175247	0.000723061	K00517|1|2e-117|419|ath:AT4G37430|[EC:1.14.-.-]	GO:0043231//intracellular membrane-bounded organelle	GO:0016491//oxidoreductase activity;GO:0005506//iron ion binding	GO:0052482;GO:0019761//glucosinolate biosynthetic process	gi|15235559|ref|NP_195459.1|/1.9618e-116/cytochrome P450 81F1 [Arabidopsis thaliana]
gnl|UG|Rsa#S42021107	813	0	17	0.01	4.02063	8.65128	Up	5.45102e-05	0.000242549	-	-	-	-	gi|15240103|ref|NP_198523.1|/1.79177e-90/uncharacterized protein [Arabidopsis thaliana]
gi|154263030|gb|EV574001.1|EV574001	734	0	15	0.01	3.92945	8.61818	Up	0.000175247	0.000723275	-	-	-	-	gi|240254666|ref|NP_182217.4|/3.87993e-38/uncharacterized protein [Arabidopsis thaliana]
gnl|UG|Rsa#S42033126	761	0	15	0.01	3.79003	8.56607	Up	0.000175247	0.000722953	K05283|1|1e-11|68.2|aly:ARALYDRAFT_354960|phosphatidylinositol glycan, class W [EC:2.3.-.-];K13148|2|1e-10|64.7|vvi:100261060|integrator complex subunit 11 [EC:3.1.27.-];K11982|4|8e-09|58.9|bdi:100833984|E3 ubiquitin-protein ligase RNF115/126 [EC:6.3.2.19]	GO:0044464//cell part	GO:0046914//transition metal ion binding	-	gi|334188355|ref|NP_200123.2|/1.29963e-100/RING/U-box domain-containing protein-like protein [Arabidopsis thaliana]
CL363.Contig3_NAU-LB	1219	0	23	0.01	3.62794	8.50301	Up	1.64044e-06	9.09085e-06	K04079|1|9e-105|378|ath:AT5G52640|molecular chaperone HtpG	GO:0044444//cytoplasmic part;GO:0016020//membrane;GO:0030312//external encapsulating structure	GO:0005515//protein binding;GO:0032559	GO:0006952//defense response;GO:0010035//response to inorganic substance;GO:0044267//cellular protein metabolic process	gi|312283005|dbj|BAJ34368.1|/1.06404e-104/unnamed protein product [Thellungiella halophila]
gi|154098850|gb|EV531823.1|EV531823	849	0	16	0.01	3.62367	8.50131	Up	9.7738e-05	0.000419873	K12135|1|1e-15|81.6|aly:ARALYDRAFT_488429|zinc finger protein CONSTANS	GO:0043231//intracellular membrane-bounded organelle	GO:0003676//nucleic acid binding;GO:0046914//transition metal ion binding;GO:0001071//nucleic acid binding transcription factor activity;GO:0005515//protein binding	GO:0006970//response to osmotic stress;GO:0006351//transcription, DNA-dependent;GO:0009639//response to red or far red light	gi|297822885|ref|XP_002879325.1|/1.61827e-113/hypothetical protein ARALYDRAFT_482070 [Arabidopsis lyrata subsp. lyrata]
gi|154170929|gb|EV542203.1|EV542203	853	0	16	0.01	3.60668	8.49453	Up	9.7738e-05	0.000419906	-	-	GO:0003676//nucleic acid binding;GO:0001071//nucleic acid binding transcription factor activity	GO:0006351//transcription, DNA-dependent;GO:0032501//multicellular organismal process	gi|297833088|ref|XP_002884426.1|/9.67358e-90/ANAC047 [Arabidopsis lyrata subsp. lyrata]
gi|158659350|gb|EX769241.1|EX769241	864	0	16	0.01	3.56076	8.47604	Up	9.7738e-05	0.000419743	-	-	GO:0003676//nucleic acid binding;GO:0001071//nucleic acid binding transcription factor activity	GO:0006351//transcription, DNA-dependent;GO:0032501//multicellular organismal process	gi|297833088|ref|XP_002884426.1|/1.06459e-83/ANAC047 [Arabidopsis lyrata subsp. lyrata]
gi|154254397|gb|EV565482.1|EV565482	865	0	15	0.01	3.33435	8.38126	Up	0.000175247	0.000723114	K00799|1|2e-64|244|aly:ARALYDRAFT_901907|glutathione S-transferase [EC:2.5.1.18]	GO:0044424//intracellular part	GO:0016765//transferase activity, transferring alkyl or aryl (other than methyl) groups	GO:0009404//toxin metabolic process;GO:0010033//response to organic substance	gi|158578615|gb|ABW74586.1|/4.15557e-96/glutathione-S-transferase [Boechera divaricarpa]
CL8958.Contig1_NAU-LB	1132	0	19	0.01	3.22733	8.3342	Up	1.69553e-05	8.24536e-05	-	GO:0031090//organelle membrane;GO:0009534//chloroplast thylakoid;GO:0031410//cytoplasmic vesicle	-	-	gi|297825099|ref|XP_002880432.1|/3.14265e-47/lipid-associated family protein [Arabidopsis lyrata subsp. lyrata]
CL5041.Contig2_NAU-LB	1280	0	18	0.01	2.70395	8.07892	Up	3.04012e-05	0.000141456	-	-	-	-	gi|297802452|ref|XP_002869110.1|/7.37035e-88/hypothetical protein ARALYDRAFT_491149 [Arabidopsis lyrata subsp. lyrata]
CL7786.Contig1_NAU-LB	2326	0	31	0.01	2.56264	8.00149	Up	1.53557e-08	1.06594e-07	K12134|1|0.0|476|aly:ARALYDRAFT_904154|circadian clock associated 1;K12133|5|5e-41|167|aly:ARALYDRAFT_470177|LATE ELONGATED HYPOCOTYL	GO:0043231//intracellular membrane-bounded organelle	GO:0003676//nucleic acid binding;GO:0005515//protein binding	GO:0043393//regulation of protein binding;GO:0009725//response to hormone stimulus;GO:0048571//long-day photoperiodism;GO:0006970//response to osmotic stress;GO:0048511//rhythmic process;GO:0010038//response to metal ion	gi|328684599|gb|AEB33729.1|/0/CIRCADIAN AND CLOCK ASSOCIATED 1 [Brassica rapa]
Unigene6701_NAU-LB	1272	1	278	0.190617	42.0237	7.78438	Up	4.4185e-69	2.0623e-67	K08176|1|0.0|672|aly:ARALYDRAFT_482224|MFS transporter, PHS family, inorganic phosphate transporter	GO:0031224//intrinsic to membrane	GO:0015291//secondary active transmembrane transporter activity;GO:0015103//inorganic anion transmembrane transporter activity	GO:0015698//inorganic anion transport	gi|297826727|ref|XP_002881246.1|/0/hypothetical protein ARALYDRAFT_482224 [Arabidopsis lyrata subsp. lyrata]
CL6810.Contig2_NAU-LB	1108	6	1435	1.31299	249.028	7.56731	Up	0	0	K13248|1|4e-128|456|aly:ARALYDRAFT_889181|pyridoxal phosphate phosphatase PHOSPHO2 [EC:3.1.3.74]	GO:0044464//cell part	GO:0016791//phosphatase activity;GO:0016462//pyrophosphatase activity	GO:0007165//signal transduction;GO:0051259//protein oligomerization;GO:0006796//phosphate-containing compound metabolic process;GO:0009267//cellular response to starvation	gi|297850166|ref|XP_002892964.1|/5.07072e-127/phosphoric monoester hydrolase [Arabidopsis lyrata subsp. lyrata]
CL629.Contig7_NAU-LB	407	1	178	0.595738	84.0934	7.14117	Up	6.50272e-44	1.96777e-42	K15638|1|5e-40|160|ath:AT1G17060|cytochrome P450, family 72, subfamily C, polypeptide 1;K15639|3|7e-35|143|aly:ARALYDRAFT_901457|cytochrome P450, family 734, subfamily A, polypeptide 1 (PHYB activation tagged suppressor 1) [EC:1.14.-.-];K10717|5|7e-32|133|pop:POPTR_743744|cytokinin trans-hydroxylase	GO:0043231//intracellular membrane-bounded organelle	GO:0016491//oxidoreductase activity;GO:0005506//iron ion binding	GO:0008152//metabolic process	gi|15231906|ref|NP_188086.1|/1.45216e-65/cytochrome P450, family 72, subfamily A, polypeptide 14 [Arabidopsis thaliana]
CL4867.Contig1_NAU-LB	790	1	176	0.306918	42.8373	7.12487	Up	2.06752e-43	6.18909e-42	-	-	-	-	gi|18420313|ref|NP_568401.1|/1.98387e-46/uncharacterized protein [Arabidopsis thaliana]
Unigene7533_NAU-LB	290	1	163	0.836087	108.075	7.01417	Up	3.79642e-40	1.05678e-38	-	-	-	-	-
Unigene21977_NAU-LB	906	1	131	0.267622	27.8022	6.69886	Up	3.99296e-32	9.0487e-31	-	-	-	GO:0010647//positive regulation of cell communication;GO:0009267//cellular response to starvation	gi|334050274|gb|AEG42534.1|/2.21074e-103/SPX domain-harboring protein 3.1 [Brassica napus]
Unigene21939_NAU-LB	920	2	226	0.527098	47.2342	6.48562	Up	2.8177e-54	1.04006e-52	-	-	-	-	gi|15226043|ref|NP_179106.1|/6.50098e-143/uncharacterized protein [Arabidopsis thaliana]
Unigene10558_NAU-LB	572	3	319	1.27167	107.234	6.39789	Up	6.93538e-76	3.55001e-74	-	GO:0044464//cell part	-	-	gi|297832538|ref|XP_002884151.1|/1.43305e-56/hypothetical protein ARALYDRAFT_480770 [Arabidopsis lyrata subsp. lyrata]
CL2057.Contig2_NAU-LB	904	26	2721	6.97356	578.757	6.37492	Up	0	0	K04569|1|5e-58|222|aly:ARALYDRAFT_471402|copper chaperone for superoxide dismutase	GO:0009536//plastid	GO:0016531//copper chaperone activity	GO:0006812//cation transport;GO:0072593//reactive oxygen species metabolic process	gi|297849624|ref|XP_002892693.1|/6.89029e-57/Cu/Zn-superoxide dismutase copper chaperone precursor [Arabidopsis lyrata subsp. lyrata]
gnl|UG|Rsa#S41998027	756	1	97	0.320721	24.671	6.26535	Up	1.24856e-23	2.11347e-22	-	-	-	-	gi|297812261|ref|XP_002874014.1|/2.15565e-55/hypothetical protein ARALYDRAFT_488984 [Arabidopsis lyrata subsp. lyrata]
Unigene3466_NAU-LB	684	1	95	0.354481	26.7057	6.23529	Up	3.93398e-23	6.54161e-22	K01051|1|4e-14|76.3|vvi:100251413|pectinesterase [EC:3.1.1.11]	GO:0044464//cell part	GO:0004091//carboxylesterase activity;GO:0004857//enzyme inhibitor activity	-	gi|297828487|ref|XP_002882126.1|/5.53421e-73/hypothetical protein ARALYDRAFT_904242 [Arabidopsis lyrata subsp. lyrata]
CL9528.Contig1_NAU-LB	527	2	185	0.920172	67.499	6.19682	Up	4.74476e-44	1.44366e-42	-	GO:0044464//cell part	-	-	gi|297832540|ref|XP_002884152.1|/4.65448e-53/hypothetical protein ARALYDRAFT_480771 [Arabidopsis lyrata subsp. lyrata]
gi|166140043|gb|FD571044.1|FD571044	734	1	90	0.330334	23.5767	6.15729	Up	6.9196e-22	1.09932e-20	-	GO:0043231//intracellular membrane-bounded organelle	GO:0005543//phospholipid binding	GO:0009648//photoperiodism;GO:0009908//flower development	gi|261873777|gb|ACY03400.1|/9.70774e-98/flowering locus T [Brassica napus]
CL7739.Contig2_NAU-LB	1607	1	88	0.150881	10.5294	6.12487	Up	2.1769e-21	3.38021e-20	K00517|1|0.0|868|ath:AT4G37430|[EC:1.14.-.-]	GO:0043231//intracellular membrane-bounded organelle	GO:0004497//monooxygenase activity;GO:0005506//iron ion binding	GO:0052482;GO:0019761//glucosinolate biosynthetic process	gi|15235559|ref|NP_195459.1|/0/cytochrome P450 81F1 [Arabidopsis thaliana]
CL98.Contig1_NAU-LB	843	11	937	3.16384	213.721	6.07791	Up	4.6751e-217	6.87524e-215	K08081|1|3e-99|359|aly:ARALYDRAFT_481850|tropine dehydrogenase [EC:1.1.1.206]	-	GO:0016616//oxidoreductase activity, acting on the CH-OH group of donors, NAD or NADP as acceptor	GO:0006952//defense response;GO:0008152//metabolic process;GO:0032502//developmental process	gi|158578532|gb|ABW74557.1|/5.15224e-104/tropinone-reductase-like protein [Boechera divaricarpa]
CL5261.Contig1_NAU-LB	403	3	255	1.80495	121.667	6.07483	Up	6.0696e-60	2.4664e-58	-	-	-	-	-
gi|158665255|gb|EX775146.1|EX775146	736	1	84	0.329436	21.9451	6.05775	Up	2.15138e-20	3.20883e-19	-	-	GO:0004175//endopeptidase activity	GO:0019538//protein metabolic process	gi|297827577|ref|XP_002881671.1|/5.75081e-90/aspartyl protease family protein [Arabidopsis lyrata subsp. lyrata]
CL3273.Contig2_NAU-LB	2684	5	416	0.451686	29.8021	6.04395	Up	6.72508e-97	4.39296e-95	K05349|1|0.0|980|gmx:100798630|beta-glucosidase [EC:3.2.1.21]	GO:0005576//extracellular region;GO:0005618//cell wall	GO:0015926//glucosidase activity	GO:0044238//primary metabolic process;GO:0003006//developmental process involved in reproduction	gi|15239867|ref|NP_199747.1|/0/beta-xylosidase 1 [Arabidopsis thaliana]
Unigene24195_NAU-LB	457	1	77	0.530558	32.3974	5.93222	Up	1.17898e-18	1.61983e-17	K03093|1|5e-33|137|aly:ARALYDRAFT_489269|RNA polymerase sigma factor	-	-	GO:0006351//transcription, DNA-dependent;GO:0009639//response to red or far red light	gi|297812573|ref|XP_002874170.1|/5.16709e-32/hypothetical protein ARALYDRAFT_489269 [Arabidopsis lyrata subsp. lyrata]
Unigene15613_NAU-LB	1107	11	838	2.40932	145.557	5.91681	Up	1.76328e-192	2.19774e-190	K12133|1|7e-103|372|ath:AT1G01060|LATE ELONGATED HYPOCOTYL;K12134|3|3e-31|134|ath:AT2G46830|circadian clock associated 1	-	GO:0001071//nucleic acid binding transcription factor activity;GO:0043565//sequence-specific DNA binding	GO:0010038//response to metal ion;GO:0009725//response to hormone stimulus;GO:0007623//circadian rhythm;GO:0006970//response to osmotic stress;GO:0043392//negative regulation of DNA binding;GO:0006351//transcription, DNA-dependent;GO:0048571//long-day photoperiodism	gi|222423124|dbj|BAH19541.1|/7.34289e-102/AT1G01060 [Arabidopsis thaliana]
gi|156168831|gb|EW728977.1|EW728977	891	1	72	0.272127	15.5378	5.83536	Up	2.04882e-17	2.6468e-16	-	GO:0009534//chloroplast thylakoid	GO:0070011//peptidase activity, acting on L-amino acid peptides	GO:0019538//protein metabolic process;GO:0007165//signal transduction	gi|297817096|ref|XP_002876431.1|/2.0715e-114/peptidase S41 family protein [Arabidopsis lyrata subsp. lyrata]
gi|332769028|gb|FY432264.1|FY432264	845	1	66	0.286941	15.0184	5.70983	Up	6.26528e-16	7.44985e-15	-	-	GO:0005488//binding	-	gi|9293928|dbj|BAB01831.1|/4.44061e-63/unnamed protein product [Arabidopsis thaliana]
gi|158636197|gb|EX746088.1|EX746088	521	12	781	5.58461	288.237	5.68965	Up	6.83406e-177	7.83296e-175	-	-	GO:0046914//transition metal ion binding	GO:0030003//cellular cation homeostasis	gi|18958245|dbj|BAB85601.1|/5.53522e-27/metallothionein type 3 [Brassica juncea]
Unigene15614_NAU-LB	1152	5	325	1.05237	54.2459	5.68781	Up	2.37472e-74	1.19034e-72	K12133|1|1e-112|404|ath:AT1G01060|LATE ELONGATED HYPOCOTYL;K12134|3|2e-40|164|aly:ARALYDRAFT_904154|circadian clock associated 1	-	GO:0001071//nucleic acid binding transcription factor activity;GO:0043565//sequence-specific DNA binding	GO:0010038//response to metal ion;GO:0009725//response to hormone stimulus;GO:0007623//circadian rhythm;GO:0006970//response to osmotic stress;GO:0043392//negative regulation of DNA binding;GO:0006351//transcription, DNA-dependent;GO:0048571//long-day photoperiodism	gi|312281969|dbj|BAJ33850.1|/3.48418e-118/unnamed protein product [Thellungiella halophila]
CL6287.Contig1_NAU-LB	676	2	124	0.717353	35.2705	5.61963	Up	6.39712e-29	1.3026e-27	K12128|1|2e-38|156|ath:AT2G46790|pseudo-response regulator 9;K12130|3|2e-16|84.0|sbi:SORBI_05g003660|pseudo-response regulator 5;K12131|4|1e-15|81.6|aly:ARALYDRAFT_496148|pseudo-response regulator 3;K12129|5|1e-15|81.6|sbi:SORBI_01g038820|pseudo-response regulator 7	-	GO:0004871//signal transducer activity;GO:0003676//nucleic acid binding	GO:0006351//transcription, DNA-dependent;GO:0009628//response to abiotic stimulus;GO:0007165//signal transduction;GO:0048511//rhythmic process	gi|20466420|gb|AAM20527.1|/2.81516e-37/unknown protein [Arabidopsis thaliana]
gnl|UG|Rsa#S42003983	540	1	62	0.44901	22.0767	5.61963	Up	6.10168e-15	6.85363e-14	-	-	-	-	-
gi|156177849|gb|EW737995.1|EW737995	487	1	59	0.497875	23.2948	5.54808	Up	3.3556e-14	3.60314e-13	K03093|1|6e-30|127|aly:ARALYDRAFT_489269|RNA polymerase sigma factor	-	GO:0034062//RNA polymerase activity;GO:0003676//nucleic acid binding;GO:0001071//nucleic acid binding transcription factor activity;GO:0000996	GO:0006351//transcription, DNA-dependent;GO:0009639//response to red or far red light	gi|312282679|dbj|BAJ34205.1|/6.39379e-29/unnamed protein product [Thellungiella halophila]
Unigene8755_NAU-LB	273	1	59	0.888151	41.5552	5.54808	Up	3.3556e-14	3.60383e-13	-	-	-	-	gi|18408896|ref|NP_564914.1|/4.21962e-12/uncharacterized protein [Arabidopsis thaliana]
Unigene19261_NAU-LB	1474	2	111	0.328989	14.4798	5.45985	Up	1.02191e-25	1.86927e-24	-	GO:0043231//intracellular membrane-bounded organelle	-	-	gi|312282267|dbj|BAJ33999.1|/1.17744e-164/unnamed protein product [Thellungiella halophila]
CL2480.Contig1_NAU-LB	629	1	46	0.385477	14.0619	5.189	Up	5.2563e-11	4.5252e-10	-	-	GO:0004672//protein kinase activity	GO:0006464//cellular protein modification process	gi|297834790|ref|XP_002885277.1|/1.73216e-43/hypothetical protein ARALYDRAFT_318635 [Arabidopsis lyrata subsp. lyrata]
Unigene26750_NAU-LB	680	1	46	0.356566	13.0072	5.189	Up	5.2563e-11	4.5245e-10	-	GO:0043231//intracellular membrane-bounded organelle	GO:0001071//nucleic acid binding transcription factor activity	GO:0006351//transcription, DNA-dependent	gi|297841887|ref|XP_002888825.1|/9.43361e-53/predicted protein [Arabidopsis lyrata subsp. lyrata]
Unigene22138_NAU-LB	714	3	136	1.01876	36.6249	5.16794	Up	1.44425e-30	3.11784e-29	-	GO:0016020//membrane	GO:0015103//inorganic anion transmembrane transporter activity;GO:0003824//catalytic activity	GO:0006950//response to stress;GO:0015698//inorganic anion transport	gi|297799532|ref|XP_002867650.1|/4.78674e-62/predicted protein [Arabidopsis lyrata subsp. lyrata]
Unigene12191_NAU-LB	292	1	45	0.83036	29.6323	5.15729	Up	9.23334e-11	7.78393e-10	-	GO:0044464//cell part	GO:0008194//UDP-glycosyltransferase activity	-	gi|42567851|ref|NP_196959.2|/1.32368e-18/Core-2/I-branching beta-1,6-N-acetylglucosaminyltransferase family protein [Arabidopsis thaliana]
Unigene20912_NAU-LB	463	2	88	1.04737	36.5458	5.12487	Up	4.44298e-20	6.52008e-19	-	GO:0044464//cell part	GO:0004866//endopeptidase inhibitor activity	GO:0006950//response to stress	gi|37202046|gb|AAQ89638.1|/2.54161e-34/At1g72060 [Arabidopsis thaliana]
Unigene25591_NAU-LB	521	1	44	0.465384	16.2387	5.12487	Up	1.62126e-10	1.33993e-09	K12128|1|4e-48|188|aly:ARALYDRAFT_483843|pseudo-response regulator 9	-	GO:0003676//nucleic acid binding	GO:0009628//response to abiotic stimulus;GO:0007165//signal transduction;GO:0048511//rhythmic process	gi|312283015|dbj|BAJ34373.1|/4.97168e-52/unnamed protein product [Thellungiella halophila]
Unigene23913_NAU-LB	667	4	173	1.45406	49.872	5.10007	Up	2.3942e-38	6.38327e-37	-	-	-	-	gi|15235246|ref|NP_194558.1|/5.32171e-09/uncharacterized protein [Arabidopsis thaliana]
gi|167479304|gb|FD963556.1|FD963556	815	1	42	0.297503	9.90895	5.05775	Up	4.99166e-10	3.95611e-09	-	GO:0043231//intracellular membrane-bounded organelle	-	GO:0010647//positive regulation of cell communication;GO:0009267//cellular response to starvation	gi|297808083|ref|XP_002871925.1|/1.1249e-84/SPX domain-containing protein [Arabidopsis lyrata subsp. lyrata]
CL1480.Contig1_NAU-LB	626	1	42	0.387325	12.9006	5.05775	Up	4.99166e-10	3.95667e-09	-	-	-	-	gi|297845452|ref|XP_002890607.1|/5.01861e-19/hypothetical protein ARALYDRAFT_889961 [Arabidopsis lyrata subsp. lyrata]
CL6287.Contig2_NAU-LB	965	2	83	0.502519	16.5381	5.04048	Up	7.3613e-19	1.022e-17	K12128|1|6e-56|216|aly:ARALYDRAFT_483843|pseudo-response regulator 9;K12130|3|1e-14|79.0|sbi:SORBI_05g003660|pseudo-response regulator 5;K12131|5|5e-14|76.6|aly:ARALYDRAFT_496148|pseudo-response regulator 3	-	GO:0004871//signal transducer activity;GO:0003676//nucleic acid binding	GO:0006351//transcription, DNA-dependent;GO:0009628//response to abiotic stimulus;GO:0007165//signal transduction;GO:0048511//rhythmic process	gi|312283015|dbj|BAJ34373.1|/4.05218e-58/unnamed protein product [Thellungiella halophila]
gi|332785469|gb|FY444001.1|FY444001	907	1	41	0.267327	8.69186	5.02299	Up	8.75244e-10	6.78577e-09	-	GO:0043231//intracellular membrane-bounded organelle	GO:0003676//nucleic acid binding;GO:0001071//nucleic acid binding transcription factor activity	GO:0009642//response to light intensity;GO:0009813//flavonoid biosynthetic process;GO:0006355//regulation of transcription, DNA-dependent;GO:0032501//multicellular organismal process	gi|312282893|dbj|BAJ34312.1|/5.97867e-125/unnamed protein product [Thellungiella halophila]
Unigene22473_NAU-LB	989	2	81	0.490324	15.748	5.00529	Up	2.2588e-18	3.05733e-17	K08150|1|9e-150|527|ath:AT1G30220|MFS transporter, SP family, solute carrier family 2 (myo-inositol transporter), member 13	GO:0031224//intrinsic to membrane;GO:0042995//cell projection	GO:0005365//myo-inositol transmembrane transporter activity	GO:0015791//polyol transport	gi|75333454|sp|Q9C757.1|INT2_ARATH/1.15595e-148/RecName: Full=Probable inositol transporter 2
gnl|UG|Rsa#S42001638	542	2	80	0.894706	28.3809	4.98737	Up	3.95512e-18	5.29786e-17	-	GO:0030312//external encapsulating structure	-	GO:0001906//cell killing;GO:0006952//defense response	gi|11386627|sp|O24331.1|DEF4_RAPSA/1.03703e-34/RecName: Full=Defensin-like protein 4; AltName: Full=Cysteine-rich antifungal protein 4; Short=AFP4; Flags: Precursor
gnl|UG|Rsa#S41982045	805	1	40	0.301199	9.55433	4.98737	Up	1.53388e-09	1.16868e-08	K13508|1|5e-65|245|aly:ARALYDRAFT_482818|glycerol-3-phosphate acyltransferase [EC:2.3.1.15]	GO:0044464//cell part	GO:0016411//acylglycerol O-acyltransferase activity	GO:0006633//fatty acid biosynthetic process;GO:0009791//post-embryonic development	gi|443426871|gb|AGC91763.1|/4.35402e-65/glycerol-3-phosphate acyltransferase 6 [Brassica napus]
gi|166126676|gb|FD558571.1|FD558571	655	1	39	0.370176	11.4488	4.95084	Up	2.6867e-09	2.00471e-08	K14709|1|3e-68|256|aly:ARALYDRAFT_470527|solute carrier family 39 (zinc transporter), member 1/2/3	GO:0031224//intrinsic to membrane	GO:0016491//oxidoreductase activity;GO:0046915//transition metal ion transmembrane transporter activity	GO:0006829//zinc ion transport	gi|297848800|ref|XP_002892281.1|/3.18221e-67/hypothetical protein ARALYDRAFT_470527 [Arabidopsis lyrata subsp. lyrata]
CL8729.Contig1_NAU-LB	514	1	39	0.471722	14.5894	4.95084	Up	2.6867e-09	2.00444e-08	K03549|1|2e-44|176|rcu:RCOM_0689490|KUP system potassium uptake protein	GO:0016020//membrane	GO:0046873//metal ion transmembrane transporter activity	GO:0030001//metal ion transport;GO:0034220//ion transmembrane transport	gi|297841767|ref|XP_002888765.1|/5.7576e-50/hypothetical protein ARALYDRAFT_894830 [Arabidopsis lyrata subsp. lyrata]
gi|161552820|gb|EY924796.1|EY924796	689	1	38	0.351909	10.6048	4.91337	Up	4.70334e-09	3.42217e-08	-	-	-	-	gi|42561803|ref|NP_172308.2|/8.64332e-50/esterase/lipase/thioesterase-like protein [Arabidopsis thaliana]
CL4628.Contig1_NAU-LB	1384	7	265	1.22634	36.8168	4.90793	Up	4.99516e-57	1.92563e-55	K09874|1|2e-148|524|aly:ARALYDRAFT_477170|aquaporin NIP	GO:0031224//intrinsic to membrane	GO:0042887;GO:0015166//polyol transmembrane transporter activity;GO:0005372//water transmembrane transporter activity;GO:0015103//inorganic anion transmembrane transporter activity	GO:0006820//anion transport;GO:0015840//urea transport;GO:0034220//ion transmembrane transport;GO:0010036//response to boron-containing substance;GO:0008643//carbohydrate transport	gi|297839859|ref|XP_002887811.1|/2.06068e-147/hypothetical protein ARALYDRAFT_477170 [Arabidopsis lyrata subsp. lyrata]
Unigene17141_NAU-LB	1125	9	339	1.93972	57.9406	4.90065	Up	1.54223e-72	7.50052e-71	-	GO:0043231//intracellular membrane-bounded organelle	-	-	gi|145329999|ref|NP_001077985.1|/0/uncharacterized protein [Arabidopsis thaliana]
CL8493.Contig1_NAU-LB	1034	7	261	1.64145	48.5351	4.88599	Up	4.65308e-56	1.76922e-54	K01897|1|1e-142|504|ath:AT3G23790|long-chain acyl-CoA synthetase [EC:6.2.1.3]	GO:0009526//plastid envelope	GO:0015645//fatty acid ligase activity	GO:0006633//fatty acid biosynthetic process	gi|20799733|gb|AAM28629.1|AF503771_1/1.46928e-141/acyl-CoA synthetase-like protein [Arabidopsis thaliana]
gi|156174195|gb|EW734341.1|EW734341	668	1	37	0.362972	10.6503	4.87489	Up	8.22882e-09	5.85251e-08	-	-	GO:0001071//nucleic acid binding transcription factor activity	-	gi|15224208|ref|NP_181834.1|/5.67585e-51/ILI1 binding bHLH 1 protein [Arabidopsis thaliana]
CL2721.Contig3_NAU-LB	1046	8	287	1.85442	52.7578	4.83034	Up	3.73706e-61	1.55844e-59	-	GO:0043231//intracellular membrane-bounded organelle	-	GO:0010647//positive regulation of cell communication;GO:0009267//cellular response to starvation	gi|297808083|ref|XP_002871925.1|/2.88722e-87/SPX domain-containing protein [Arabidopsis lyrata subsp. lyrata]
Unigene21363_NAU-LB	1144	6	206	1.27167	34.624	4.76698	Up	6.03892e-44	1.83041e-42	K01097|1|3e-13|74.3|ppp:PHYPADRAFT_170201|N-acylneuraminate-9-phosphatase [EC:3.1.3.29];K00861|3|9e-06|49.7|aly:ARALYDRAFT_914528|riboflavin kinase [EC:2.7.1.26]	-	GO:0016791//phosphatase activity	-	gi|312282223|dbj|BAJ33977.1|/9.9727e-134/unnamed protein product [Thellungiella halophila]
Unigene5817_NAU-LB	571	3	102	1.2739	34.3479	4.7529	Up	2.63034e-22	4.23084e-21	-	-	-	-	gi|297843610|ref|XP_002889686.1|/8.59381e-94/predicted protein [Arabidopsis lyrata subsp. lyrata]
gi|158667004|gb|EX776895.1|EX776895	798	1	34	0.303841	8.19242	4.7529	Up	4.39002e-08	2.89658e-07	K14515|1|6e-13|72.8|aly:ARALYDRAFT_481400|EIN3-binding F-box protein;K03875|3|2e-11|67.4|vvi:100255759|F-box and leucine-rich repeat protein 1 (S-phase kinase-associated protein 2)	-	GO:0003824//catalytic activity	-	gi|297794281|ref|XP_002865025.1|/8.29784e-109/F-box family protein [Arabidopsis lyrata subsp. lyrata]
Unigene10240_NAU-LB	650	3	99	1.11907	29.2859	4.70983	Up	1.39147e-21	2.17951e-20	K09753|1|1e-38|157|pop:POPTR_813757|cinnamoyl-CoA reductase [EC:1.2.1.44]	GO:0044464//cell part	GO:0048037//cofactor binding;GO:0016616//oxidoreductase activity, acting on the CH-OH group of donors, NAD or NADP as acceptor	GO:0009699//phenylpropanoid biosynthetic process	gi|227325767|gb|ACP20257.1|/5.62855e-101/cinnamyl-alcohol dehydrogenase [Brassica rapa subsp. campestris]
gi|167506140|gb|FD986486.1|FD986486	771	2	66	0.628963	16.4598	4.70983	Up	9.74046e-15	1.07861e-13	-	-	-	-	gi|297836136|ref|XP_002885950.1|/5.60332e-77/hypothetical protein ARALYDRAFT_480385 [Arabidopsis lyrata subsp. lyrata]
gnl|UG|Rsa#S42015849	810	2	65	0.59868	15.4299	4.68781	Up	1.6968e-14	1.84984e-13	K09422|1|6e-40|162|aly:ARALYDRAFT_472077|myb proto-oncogene protein, plant	-	-	GO:0006952//defense response;GO:0044249//cellular biosynthetic process;GO:0044238//primary metabolic process;GO:0009725//response to hormone stimulus	gi|238625815|gb|ACR48188.1|/3.14912e-55/MYB domain protein 51-2 [Brassica rapa subsp. pekinensis]
gnl|UG|Rsa#S42003205	641	6	194	2.26957	58.1942	4.68039	Up	4.69922e-41	1.33482e-39	-	-	-	GO:0006952//defense response;GO:0001906//cell killing	gi|11386628|sp|O24332.1|DEF3_RAPSA/6.44951e-33/RecName: Full=Defensin-like protein 3; AltName: Full=Cysteine-rich antifungal protein 3; Short=AFP3; Flags: Precursor
Unigene10500_NAU-LB	734	2	64	0.660668	16.7656	4.66544	Up	2.9546e-14	3.18301e-13	K05283|1|2e-15|80.9|aly:ARALYDRAFT_354960|phosphatidylinositol glycan, class W [EC:2.3.-.-];K15692|2|5e-11|66.2|smo:SELMODRAFT_67002|E3 ubiquitin-protein ligase RNF13 [EC:6.3.2.19];K11982|4|5e-11|66.2|sbi:SORBI_03g011120|E3 ubiquitin-protein ligase RNF115/126 [EC:6.3.2.19]	-	GO:0046914//transition metal ion binding	-	gi|15241087|ref|NP_195808.1|/6.16575e-52/RING-H2 finger protein ATL74 [Arabidopsis thaliana]
CL8794.Contig1_NAU-LB	735	1	32	0.329885	8.37141	4.66544	Up	1.33561e-07	8.40256e-07	K15692|1|1e-10|65.1|ppp:PHYPADRAFT_16563|E3 ubiquitin-protein ligase RNF13 [EC:6.3.2.19];K11982|5|6e-08|55.8|aly:ARALYDRAFT_483145|E3 ubiquitin-protein ligase RNF115/126 [EC:6.3.2.19]	GO:0031301//integral to organelle membrane;GO:0009534//chloroplast thylakoid	GO:0005488//binding	GO:0006351//transcription, DNA-dependent;GO:0009314//response to radiation	gi|297832398|ref|XP_002884081.1|/4.71001e-60/zinc finger family protein [Arabidopsis lyrata subsp. lyrata]
CL6392.Contig1_NAU-LB	405	1	32	0.59868	15.1926	4.66544	Up	1.33561e-07	8.40161e-07	K00517|1|4e-63|237|ath:AT3G26160|[EC:1.14.-.-]	GO:0044464//cell part	GO:0016491//oxidoreductase activity;GO:0005506//iron ion binding	GO:0008152//metabolic process;GO:0009408//response to heat	gi|297818138|ref|XP_002876952.1|/1.04456e-63/CYP71B19 [Arabidopsis lyrata subsp. lyrata]
gi|166116810|gb|FD546010.1|FD546010	818	1	32	0.296412	7.52199	4.66544	Up	1.33561e-07	8.40066e-07	K00540|1|2e-123|439|aly:ARALYDRAFT_479749|[EC:1.-.-.-]	GO:0031967;GO:0043231//intracellular membrane-bounded organelle;GO:0031224//intrinsic to membrane	GO:0043169//cation binding;GO:0016682//oxidoreductase activity, acting on diphenols and related substances as donors, oxygen as acceptor	GO:0032501//multicellular organismal process;GO:0006950//response to stress;GO:0007165//signal transduction;GO:0015980//energy derivation by oxidation of organic compounds	gi|327554104|gb|AEB00555.1|/3.60113e-123/mitochondrial alternative oxidase 1a [Brassica juncea]
gi|161534888|gb|EY906911.1|EY906911	478	16	499	8.11599	200.728	4.62833	Up	6.86534e-103	4.78242e-101	-	-	-	-	-
CL396.Contig1_NAU-LB	225	1	31	1.07762	26.492	4.61963	Up	2.32686e-07	1.42516e-06	K00799|1|7e-24|106|ath:AT4G02520|glutathione S-transferase [EC:2.5.1.18]	GO:0030312//external encapsulating structure;GO:0009532//plastid stroma;GO:0005576//extracellular region;GO:0016020//membrane	GO:0042277//peptide binding;GO:0046914//transition metal ion binding;GO:0016765//transferase activity, transferring alkyl or aryl (other than methyl) groups	GO:0010038//response to metal ion;GO:0006970//response to osmotic stress;GO:0009404//toxin metabolic process;GO:0050832//defense response to fungus	gi|312282271|dbj|BAJ34001.1|/3.57819e-24/unnamed protein product [Thellungiella halophila]
Unigene6702_NAU-LB	629	3	93	1.15643	28.4294	4.61963	Up	3.86402e-20	5.68396e-19	K08176|1|1e-72|270|aly:ARALYDRAFT_482224|MFS transporter, PHS family, inorganic phosphate transporter	GO:0031224//intrinsic to membrane	GO:0015291//secondary active transmembrane transporter activity;GO:0015103//inorganic anion transmembrane transporter activity	GO:0015698//inorganic anion transport	gi|297826727|ref|XP_002881246.1|/1.15114e-71/hypothetical protein ARALYDRAFT_482224 [Arabidopsis lyrata subsp. lyrata]
CL6810.Contig1_NAU-LB	1252	22	677	4.26057	103.973	4.60902	Up	9.76386e-139	8.94173e-137	K13248|1|8e-115|412|aly:ARALYDRAFT_889181|pyridoxal phosphate phosphatase PHOSPHO2 [EC:3.1.3.74]	GO:0044464//cell part	GO:0016791//phosphatase activity;GO:0016462//pyrophosphatase activity	GO:0007165//signal transduction;GO:0051259//protein oligomerization;GO:0006796//phosphate-containing compound metabolic process;GO:0009267//cellular response to starvation	gi|297842041|ref|XP_002888902.1|/1.52903e-138/hypothetical protein ARALYDRAFT_476431 [Arabidopsis lyrata subsp. lyrata]
Unigene12176_NAU-LB	395	2	61	1.22767	29.694	4.59617	Up	1.55578e-13	1.60008e-12	K01188|1|4e-06|48.1|vvi:100255282|beta-glucosidase [EC:3.2.1.21]	GO:0016020//membrane	GO:0016491//oxidoreductase activity;GO:0005356	GO:0006810//transport	gi|297812851|ref|XP_002874309.1|/4.62401e-35/hypothetical protein ARALYDRAFT_489474 [Arabidopsis lyrata subsp. lyrata]
Unigene23889_NAU-LB	399	2	61	1.21536	29.3963	4.59617	Up	1.55578e-13	1.60068e-12	-	GO:0043231//intracellular membrane-bounded organelle;GO:0030312//external encapsulating structure;GO:0005576//extracellular region	GO:0005488//binding	GO:0009411//response to UV;GO:0010038//response to metal ion;GO:0009718//anthocyanin-containing compound biosynthetic process;GO:0009814//defense response, incompatible interaction	gi|297736217|emb|CBI24855.3|/9.28011e-37/unnamed protein product [Vitis vinifera]
Unigene22013_NAU-LB	811	2	61	0.597941	14.4626	4.59617	Up	1.55578e-13	1.60038e-12	K13413|1|3e-78|289|aly:ARALYDRAFT_474280|mitogen-activated protein kinase kinase 4/5, plant [EC:2.7.12.2]	GO:0043231//intracellular membrane-bounded organelle	GO:0004712//protein serine/threonine/tyrosine kinase activity;GO:0032559	GO:0051707//response to other organism;GO:0007243//intracellular protein kinase cascade;GO:0010374//stomatal complex development;GO:0010375//stomatal complex patterning;GO:0003006//developmental process involved in reproduction;GO:0006464//cellular protein modification process	gi|312281759|dbj|BAJ33745.1|/2.25651e-77/unnamed protein product [Thellungiella halophila]
gi|158918561|gb|EX891157.1|EX891157	734	29	873	9.57969	228.694	4.57729	Up	9.58344e-178	1.10069e-175	-	-	-	-	-
CL3513.Contig3_NAU-LB	251	1	30	0.965997	22.9818	4.57233	Up	4.05034e-07	2.41608e-06	-	-	GO:0046914//transition metal ion binding	GO:0006812//cation transport	gi|297823503|ref|XP_002879634.1|/1.16904e-14/hypothetical protein ARALYDRAFT_482676 [Arabidopsis lyrata subsp. lyrata]
gnl|UG|Rsa#S42578065	643	1	30	0.377084	8.97111	4.57233	Up	4.05034e-07	2.41634e-06	-	GO:0044464//cell part	GO:0046914//transition metal ion binding;GO:0001071//nucleic acid binding transcription factor activity	GO:0006351//transcription, DNA-dependent	gi|312283179|dbj|BAJ34455.1|/8.65633e-54/unnamed protein product [Thellungiella halophila]
CL6926.Contig1_NAU-LB	390	1	30	0.621706	14.7908	4.57233	Up	4.05034e-07	2.41582e-06	K00517|1|2e-31|132|ath:AT5G25140|[EC:1.14.-.-]	GO:0016020//membrane	GO:0016709//oxidoreductase activity, acting on paired donors, with incorporation or reduction of molecular oxygen, NAD(P)H as one donor, and incorporation of one atom of oxygen;GO:0005506//iron ion binding	GO:0008152//metabolic process	gi|297808513|ref|XP_002872140.1|/3.67724e-32/CYP71B11 [Arabidopsis lyrata subsp. lyrata]
gnl|UG|Rsa#S42041509	836	3	87	0.87009	20.0101	4.52342	Up	1.06083e-18	1.46147e-17	K00517|1|4e-90|172|ath:AT3G26210|[EC:1.14.-.-]	GO:0044464//cell part	GO:0016491//oxidoreductase activity;GO:0005506//iron ion binding	GO:0008152//metabolic process	gi|297818142|ref|XP_002876954.1|/6.49404e-90/CYP71B23 [Arabidopsis lyrata subsp. lyrata]
gi|332769034|gb|FY432270.1|FY432270	826	1	28	0.293541	6.518	4.47279	Up	1.22386e-06	6.87898e-06	K01177|1|5e-31|132|vvi:100247246|beta-amylase [EC:3.2.1.2]	-	GO:0043167//ion binding;GO:0016160//amylase activity	GO:0005976//polysaccharide metabolic process	gi|15239531|ref|NP_197368.1|/2.15869e-115/inactive beta-amylase 9 [Arabidopsis thaliana]
CL1987.Contig1_NAU-LB	476	3	84	1.52814	33.9319	4.47279	Up	5.532e-18	7.37101e-17	-	-	-	-	-
gi|158941075|gb|EX903407.1|EX903407	755	13	359	4.1749	91.4289	4.45284	Up	9.33844e-73	4.54965e-71	-	-	-	-	gi|297841501|ref|XP_002888632.1|/3.93463e-25/hypothetical protein ARALYDRAFT_894548 [Arabidopsis lyrata subsp. lyrata]
Unigene13169_NAU-LB	944	2	55	0.513697	11.2028	4.4468	Up	4.25672e-12	3.99168e-11	-	-	-	-	gi|15242653|ref|NP_201118.1|/6.99336e-57/octicosapeptide/Phox/Bem1p domain-containing protein [Arabidopsis thaliana]
Unigene23330_NAU-LB	267	2	54	1.81622	38.8883	4.42033	Up	7.37504e-12	6.81695e-11	-	-	-	-	gi|15229356|ref|NP_191855.1|/4.3948e-09/glutaredoxin-C14 [Arabidopsis thaliana]
gnl|UG|Rsa#S42577377	665	11	295	4.0107	85.2975	4.41058	Up	1.10037e-59	4.45508e-58	-	-	-	-	gi|297840021|ref|XP_002887892.1|/7.89711e-29/hypothetical protein ARALYDRAFT_474913 [Arabidopsis lyrata subsp. lyrata]
gnl|UG|Rsa#S42013290	586	4	107	1.65505	35.1093	4.4069	Up	2.04168e-22	3.30407e-21	-	-	-	-	gi|37528811|gb|AAQ92331.1|/2.56157e-11/unknown protein [Brassica rapa subsp. pekinensis]
Unigene22481_NAU-LB	960	5	132	1.26284	26.4386	4.3879	Up	2.58032e-27	5.00829e-26	K08150|1|2e-102|370|aly:ARALYDRAFT_473243|MFS transporter, SP family, solute carrier family 2 (myo-inositol transporter), member 13	GO:0016020//membrane;GO:0042995//cell projection	GO:0005365//myo-inositol transmembrane transporter activity	GO:0015791//polyol transport	gi|297851452|ref|XP_002893607.1|/2.94851e-101/ATINT2 [Arabidopsis lyrata subsp. lyrata]
gi|332792788|gb|FY451566.1|FY451566	829	6	158	1.75487	36.647	4.38426	Up	1.92096e-32	4.39985e-31	K00924|1|2e-12|70.9|aly:ARALYDRAFT_489138|[EC:2.7.1.-]	GO:0005576//extracellular region	GO:0004175//endopeptidase activity	GO:0019538//protein metabolic process	gi|297811185|ref|XP_002873476.1|/1.14464e-116/hypothetical protein ARALYDRAFT_325615 [Arabidopsis lyrata subsp. lyrata]
Unigene6464_NAU-LB	1101	1	26	0.220223	4.54069	4.36588	Up	3.6829e-06	1.94757e-05	-	-	-	GO:0006810//transport	gi|18394560|ref|NP_564043.1|/2.82926e-154/transmembrane transporter-like protein [Arabidopsis thaliana]
Unigene15195_NAU-LB	251	2	52	1.93199	39.8351	4.36588	Up	2.2098e-11	1.95699e-10	-	GO:0043231//intracellular membrane-bounded organelle;GO:0016020//membrane	GO:0004672//protein kinase activity;GO:0032559	GO:0009725//response to hormone stimulus;GO:0006468//protein phosphorylation	gi|297799662|ref|XP_002867715.1|/4.43207e-22/hypothetical protein ARALYDRAFT_492542 [Arabidopsis lyrata subsp. lyrata]
gi|166112617|gb|FD544848.1|FD544848	849	5	129	1.42795	29.2158	4.35474	Up	1.3319e-26	2.52262e-25	-	GO:0016020//membrane	-	GO:0006950//response to stress	gi|297852964|ref|XP_002894363.1|/2.21627e-86/hypothetical protein ARALYDRAFT_892219 [Arabidopsis lyrata subsp. lyrata]
Unigene19332_NAU-LB	370	24	608	15.7275	315.964	4.3284	Up	4.31614e-120	3.47221e-118	-	-	-	-	gi|297841499|ref|XP_002888631.1|/2.0178e-14/hypothetical protein ARALYDRAFT_894547 [Arabidopsis lyrata subsp. lyrata]
CL7479.Contig1_NAU-LB	488	1	25	0.496855	9.85046	4.30929	Up	6.37786e-06	3.28094e-05	-	-	GO:0005488//binding	GO:0006950//response to stress	gi|297812669|ref|XP_002874218.1|/5.20625e-47/predicted protein [Arabidopsis lyrata subsp. lyrata]
gi|158643246|gb|EX753137.1|EX753137	461	1	25	0.525955	10.4274	4.30929	Up	6.37786e-06	3.28064e-05	K01595|1|2e-50|196|aly:ARALYDRAFT_903633|phosphoenolpyruvate carboxylase [EC:4.1.1.31]	GO:0005576//extracellular region;GO:0016020//membrane;GO:0009536//plastid	GO:0046872//metal ion binding;GO:0004611//phosphoenolpyruvate carboxykinase activity;GO:0016628//oxidoreductase activity, acting on the CH-CH group of donors, NAD or NADP as acceptor	GO:0071704;GO:0009060//aerobic respiration;GO:0043648//dicarboxylic acid metabolic process	gi|507808|dbj|BAA03094.1|/1.75198e-51/phosphoenolpyruvate carboxylase [Brassica napus]
CL5441.Contig2_NAU-LB	1271	15	362	2.86151	54.7645	4.25839	Up	2.40702e-71	1.15249e-69	K00750|1|4e-15|80.9|rcu:RCOM_0138290|glycogenin glucosyltransferase [EC:2.4.1.186]	-	GO:0016757//transferase activity, transferring glycosyl groups	GO:0005975//carbohydrate metabolic process;GO:0000302//response to reactive oxygen species;GO:0009642//response to light intensity	gi|295393494|gb|ADG03603.1|/3.11559e-171/galactinol synthase [Brassica napus]
gi|158661141|gb|EX771032.1|EX771032	759	2	48	0.638907	12.1601	4.2504	Up	1.96834e-10	1.6136e-09	-	-	GO:0004175//endopeptidase activity	GO:0019538//protein metabolic process	gi|297827577|ref|XP_002881671.1|/3.30496e-104/aspartyl protease family protein [Arabidopsis lyrata subsp. lyrata]
Unigene23243_NAU-LB	294	2	48	1.64942	31.3928	4.2504	Up	1.96834e-10	1.61408e-09	-	-	-	-	-
CL2959.Contig2_NAU-LB	929	1	24	0.260996	4.96743	4.2504	Up	1.1031e-05	5.49761e-05	-	-	GO:0005488//binding	-	gi|297812305|ref|XP_002874036.1|/2.40546e-60/hypothetical protein ARALYDRAFT_910175 [Arabidopsis lyrata subsp. lyrata]
CL4614.Contig1_NAU-LB	689	2	48	0.703818	13.3955	4.2504	Up	1.96834e-10	1.61384e-09	-	GO:0043231//intracellular membrane-bounded organelle	GO:0003676//nucleic acid binding;GO:0001071//nucleic acid binding transcription factor activity	GO:0010038//response to metal ion;GO:0009725//response to hormone stimulus;GO:0048511//rhythmic process;GO:0006970//response to osmotic stress;GO:0006351//transcription, DNA-dependent	gi|297829494|ref|XP_002882629.1|/2.35927e-39/myb family transcription factor [Arabidopsis lyrata subsp. lyrata]
gi|161548753|gb|EY920402.1|EY920402	803	2	47	0.603898	11.2543	4.22003	Up	3.39436e-10	2.72397e-09	-	-	-	-	gi|297843610|ref|XP_002889686.1|/2.06414e-83/predicted protein [Arabidopsis lyrata subsp. lyrata]
CL9546.Contig2_NAU-LB	524	7	163	3.23904	59.8126	4.20681	Up	1.35202e-32	3.10696e-31	-	-	-	-	gi|297820388|ref|XP_002878077.1|/5.39246e-62/hypothetical protein ARALYDRAFT_907071 [Arabidopsis lyrata subsp. lyrata]
gi|332777840|gb|FY441043.1|FY441043	803	2	45	0.603898	10.7754	4.15729	Up	1.00705e-09	7.77516e-09	K14638|1|8e-31|132|ppp:PHYPADRAFT_189464|solute carrier family 15 (peptide/histidine transporter), member 3/4	GO:0016020//membrane	-	GO:0015833//peptide transport;GO:0009628//response to abiotic stimulus	gi|75180586|sp|Q9LV10.1|PTR53_ARATH/1.42615e-92/RecName: Full=Probable peptide/nitrate transporter At5g62680
gi|332775119|gb|FY433641.1|FY433641	835	1	22	0.290377	5.06608	4.12487	Up	3.28622e-05	0.000152575	K12135|1|2e-17|87.8|aly:ARALYDRAFT_488429|zinc finger protein CONSTANS	GO:0044464//cell part	GO:0046914//transition metal ion binding;GO:0001071//nucleic acid binding transcription factor activity	GO:0006351//transcription, DNA-dependent	gi|297797884|ref|XP_002866826.1|/3.0931e-93/zinc finger (B-box type) family protein [Arabidopsis lyrata subsp. lyrata]
Unigene4449_NAU-LB	548	3	66	1.32736	23.1579	4.12487	Up	1.02452e-13	1.06732e-12	-	GO:0044464//cell part	GO:0043169//cation binding;GO:0016791//phosphatase activity	-	gi|297820012|ref|XP_002877889.1|/4.41267e-97/ATPAP22/PAP22 [Arabidopsis lyrata subsp. lyrata]
gi|161527333|gb|EY901308.1|EY901308	408	3	66	1.78283	31.1043	4.12487	Up	1.02452e-13	1.06752e-12	-	-	-	-	-
gi|332776992|gb|FY436514.1|FY436514	884	1	22	0.274282	4.78527	4.12487	Up	3.28622e-05	0.000152587	-	-	-	-	gi|30685481|ref|NP_180847.2|/7.46151e-08/TRAF-like family protein [Arabidopsis thaliana]
Unigene4416_NAU-LB	602	5	108	2.01383	34.4956	4.0984	Up	1.20414e-21	1.89301e-20	K01809|1|2e-80|296|aly:ARALYDRAFT_676181|mannose-6-phosphate isomerase [EC:5.3.1.8]	-	GO:0046914//transition metal ion binding;GO:0016861//intramolecular oxidoreductase activity, interconverting aldoses and ketoses	GO:0019852//L-ascorbic acid metabolic process;GO:0003006//developmental process involved in reproduction;GO:0044238//primary metabolic process	gi|297838435|ref|XP_002887099.1|/2.30268e-79/predicted protein [Arabidopsis lyrata subsp. lyrata]
gnl|UG|Rsa#S42042398	869	3	64	0.837049	14.1611	4.08048	Up	3.0207e-13	3.05861e-12	-	GO:0044464//cell part	-	-	gi|297832538|ref|XP_002884151.1|/4.09662e-51/hypothetical protein ARALYDRAFT_480770 [Arabidopsis lyrata subsp. lyrata]
gi|154167505|gb|EV538779.1|EV538779	343	4	85	2.82758	47.6498	4.07483	Up	3.22378e-17	4.12919e-16	-	-	-	-	-
Unigene12929_NAU-LB	1350	1	21	0.179604	2.99104	4.05775	Up	5.65902e-05	0.000250481	K01757|1|3e-37|154|aly:ARALYDRAFT_476541|strictosidine synthase [EC:4.3.3.2]	GO:0005618//cell wall;GO:0043231//intracellular membrane-bounded organelle;GO:0016020//membrane	GO:0016843	GO:0009820//alkaloid metabolic process	gi|15230200|ref|NP_191261.1|/2.17596e-178/strictosidine synthase family protein [Arabidopsis thaliana]
CL1331.Contig3_NAU-LB	1740	1	21	0.139348	2.32063	4.05775	Up	5.65902e-05	0.000250441	K14489|1|1e-11|70.1|vvi:100263145|arabidopsis histidine kinase 2/3/4 (cytokinin receptor) [EC:2.7.13.3]	GO:0044464//cell part	GO:0016798//hydrolase activity, acting on glycosyl bonds;GO:0043167//ion binding	GO:0010208//pollen wall assembly;GO:0003006//developmental process involved in reproduction;GO:0044238//primary metabolic process	gi|17738|emb|CAA49513.1|/0/beta-1,3-glucanase homologue [Brassica napus]
Unigene27441_NAU-LB	287	1	21	0.844827	14.0693	4.05775	Up	5.65902e-05	0.000250421	K01376|1|5e-36|147|ath:AT3G49340|[EC:3.4.22.-];K15272|2|3e-26|114|vvi:100248746|solute carrier family 35 (UDP-sugar transporter), member A1/2/3;K01365|3|8e-26|113|vvi:100246411|cathepsin L [EC:3.4.22.15]	GO:0044464//cell part	GO:0004175//endopeptidase activity	GO:0019538//protein metabolic process	gi|297826061|ref|XP_002880913.1|/6.36054e-37/hypothetical protein ARALYDRAFT_481640 [Arabidopsis lyrata subsp. lyrata]
Unigene1891_NAU-LB	270	1	21	0.898019	14.9552	4.05775	Up	5.65902e-05	0.000250461	K05016|1|3e-17|84.7|ppp:PHYPADRAFT_105025|chloride channel 7	GO:0000325//plant-type vacuole;GO:0016020//membrane	GO:0015078//hydrogen ion transmembrane transporter activity;GO:0005253//anion channel activity;GO:0015103//inorganic anion transmembrane transporter activity	GO:0015698//inorganic anion transport;GO:0010035//response to inorganic substance	gi|345291185|gb|AEN82084.1|/4.97743e-29/AT3G27170-like protein, partial [Capsella rubella]
gi|156165065|gb|EW725211.1|EW725211	683	1	21	0.355	5.912	4.05775	Up	5.65902e-05	0.000250401	K00517|1|5e-106|270|ath:AT4G37400|[EC:1.14.-.-]	GO:0043231//intracellular membrane-bounded organelle	GO:0004497//monooxygenase activity;GO:0005506//iron ion binding	GO:0019760//glucosinolate metabolic process	gi|21618287|gb|AAM67337.1|/2.60525e-105/cytochrome P450 monooxygenase-like protein [Arabidopsis thaliana]
Unigene4547_NAU-LB	555	5	104	2.18437	36.031	4.04395	Up	1.03994e-20	1.57347e-19	K13496|1|5e-37|151|aly:ARALYDRAFT_485691|UDP-glucosyl transferase 73C [EC:2.4.1.-]	GO:0044464//cell part	GO:0035251//UDP-glucosyltransferase activity	GO:0009607//response to biotic stimulus;GO:0051553	gi|18418380|ref|NP_567954.1|/3.63753e-62/UDP-glucosyltransferase 73B2 [Arabidopsis thaliana]
gi|166097052|gb|FD532145.1|FD532145	810	3	62	0.898019	14.7178	4.03467	Up	8.88344e-13	8.7186e-12	-	-	-	-	-
gi|154182869|gb|EV552209.1|EV552209	675	2	41	0.718415	11.6793	4.02299	Up	8.77286e-09	6.20688e-08	K00827|1|5e-79|291|ath:AT3G08860|alanine-glyoxylate transaminase / (R)-3-amino-2-methylpropionate-pyruvate transaminase [EC:2.6.1.44 2.6.1.40]	GO:0043231//intracellular membrane-bounded organelle	GO:0008483//transaminase activity;GO:0048037//cofactor binding	GO:0031669//cellular response to nutrient levels	gi|15231974|ref|NP_187498.1|/5.55355e-78/PYRIMIDINE 4 [Arabidopsis thaliana]
gnl|UG|Rsa#S43018651	580	5	102	2.09022	33.8149	4.01593	Up	3.04858e-20	4.50592e-19	-	-	-	-	-
CL705.Contig2_NAU-LB	488	11	224	5.4654	88.2601	4.01336	Up	5.91956e-43	1.7522e-41	-	-	GO:0046914//transition metal ion binding	GO:0030003//cellular cation homeostasis	gi|18958245|dbj|BAB85601.1|/1.47401e-25/metallothionein type 3 [Brassica juncea]
Unigene27513_NAU-LB	659	1	20	0.367929	5.83554	3.98737	Up	9.72854e-05	0.00041822	K01955|1|4e-51|199|vvi:100262205|carbamoyl-phosphate synthase large subunit [EC:6.3.5.5];K13944|2|2e-27|120|vvi:100261792|LOB domain-containing protein 16	GO:0009536//plastid	-	-	gi|79565313|ref|NP_180417.2|/7.63376e-77/LOB domain-containing protein 11 [Arabidopsis thaliana]
gnl|UG|Rsa#S42008629	779	2	40	0.622504	9.87322	3.98737	Up	1.50359e-08	1.04452e-07	K05016|1|8e-23|105|sbi:SORBI_06g030530|chloride channel 7	GO:0000325//plant-type vacuole;GO:0016020//membrane	GO:0015078//hydrogen ion transmembrane transporter activity;GO:0005253//anion channel activity;GO:0015103//inorganic anion transmembrane transporter activity	GO:0015698//inorganic anion transport;GO:0010035//response to inorganic substance	gi|15232105|ref|NP_189353.1|/1.85408e-65/chloride channel protein CLC-b [Arabidopsis thaliana]
Unigene27408_NAU-LB	278	1	20	0.872177	13.8332	3.98737	Up	9.72854e-05	0.000418187	-	-	-	-	-
gi|166111626|gb|FD542156.1|FD542156	528	2	40	0.918429	14.5667	3.98737	Up	1.50359e-08	1.04439e-07	-	-	-	-	gi|297846950|ref|XP_002891356.1|/7.28145e-06/hypothetical protein ARALYDRAFT_891525 [Arabidopsis lyrata subsp. lyrata]
Unigene7313_NAU-LB	1375	56	1087	9.87495	152.007	3.94422	Up	2.58914e-200	3.42685e-198	K13783|1|0.0|757|ath:AT3G47420|MFS transporter, OPA family, solute carrier family 37 (glycerol-3-phosphate transporter), member 1/2	GO:0043231//intracellular membrane-bounded organelle	-	GO:0071702	gi|13272469|gb|AAK17173.1|AF325105_1/0/putative protein [Arabidopsis thaliana]
Unigene25102_NAU-LB	549	3	58	1.32495	20.3138	3.93846	Up	7.61908e-12	7.02733e-11	K01322|1|7e-85|310|aly:ARALYDRAFT_472267|prolyl oligopeptidase [EC:3.4.21.26]	GO:0009536//plastid	GO:0004175//endopeptidase activity	GO:0019538//protein metabolic process	gi|297845008|ref|XP_002890385.1|/7.30729e-84/hypothetical protein ARALYDRAFT_472267 [Arabidopsis lyrata subsp. lyrata]
Unigene1419_NAU-LB	273	1	19	0.888151	13.3822	3.91337	Up	0.000166936	0.000691491	-	-	-	-	-
gi|158654199|gb|EX764090.1|EX764090	670	1	19	0.361888	5.45274	3.91337	Up	0.000166936	0.000691439	-	GO:0044421//extracellular region part	-	-	gi|297816226|ref|XP_002875996.1|/2.97105e-15/ATPSK4 [Arabidopsis lyrata subsp. lyrata]
gi|154183251|gb|EV552591.1|EV552591	565	8	152	3.43314	51.7287	3.91337	Up	4.67136e-29	9.54341e-28	K02835|1|1e-27|115|ath:AT2G47020|peptide chain release factor 1	GO:0043231//intracellular membrane-bounded organelle	GO:0003747//translation release factor activity	GO:0006412//translation	gi|42569997|ref|NP_182225.3|/1.6512e-26/Peptide chain release factor 1 [Arabidopsis thaliana]
Unigene24099_NAU-LB	215	2	38	2.25549	33.9845	3.91337	Up	4.40276e-08	2.90464e-07	-	GO:0044464//cell part	GO:0030246//carbohydrate binding;GO:0004672//protein kinase activity;GO:0032559	GO:0006464//cellular protein modification process;GO:0008037//cell recognition	gi|166846|gb|AAA32857.1|/5.42568e-12/receptor-like protein kinase [Arabidopsis thaliana]
gi|167448326|gb|FD954310.1|FD954310	743	1	19	0.326333	4.91701	3.91337	Up	0.000166936	0.000691542	K00826|1|2e-120|429|ath:AT1G10070|branched-chain amino acid aminotransferase [EC:2.6.1.42]	GO:0009536//plastid	GO:0004084//branched-chain-amino-acid transaminase activity	GO:0006520//cellular amino acid metabolic process	gi|15218409|ref|NP_172478.1|/2.03463e-119/branched-chain-amino-acid aminotransferase 2 [Arabidopsis thaliana]
Unigene4413_NAU-LB	624	5	95	1.94283	29.2735	3.91337	Up	1.29655e-18	1.77741e-17	K05279|1|5e-24|108|ath:AT5G54160|flavonol 3-O-methyltransferase [EC:2.1.1.76];K13066|2|8e-24|108|pop:POPTR_824484|caffeic acid 3-O-methyltransferase [EC:2.1.1.68]	GO:0044444//cytoplasmic part	GO:0005515//protein binding;GO:0008171//O-methyltransferase activity	GO:0006730//one-carbon metabolic process;GO:0009699//phenylpropanoid biosynthetic process	gi|15223364|ref|NP_174579.1|/1.02513e-48/O-methyltransferase-like protein [Arabidopsis thaliana]
gi|161552831|gb|EY924807.1|EY924807	648	1	19	0.374175	5.63787	3.91337	Up	0.000166936	0.000691388	-	GO:0030529//ribonucleoprotein complex	GO:0005198//structural molecule activity	GO:0010467//gene expression	gi|297838731|ref|XP_002887247.1|/2.89745e-89/hypothetical protein ARALYDRAFT_476096 [Arabidopsis lyrata subsp. lyrata]
gi|161550224|gb|EY922493.1|EY922493	505	4	74	1.92052	28.1758	3.87489	Up	1.17748e-14	1.29923e-13	-	-	-	-	gi|397914240|gb|AFO70132.1|/1.13463e-10/putative metallthionein protein type 1 [Brassica napus]
CL3698.Contig1_NAU-LB	498	4	73	1.94751	28.1858	3.85526	Up	2.00618e-14	2.18028e-13	K13783|1|8e-52|200|ath:AT3G47420|MFS transporter, OPA family, solute carrier family 37 (glycerol-3-phosphate transporter), member 1/2	-	-	GO:0071702	gi|18408421|ref|NP_566891.1|/8.25711e-51/phosphate starvation-induced protein [Arabidopsis thaliana]
gnl|UG|Rsa#S42049329	1011	3	54	0.719481	10.2702	3.83536	Up	6.45442e-11	5.51313e-10	K12818|1|3e-06|51.2|sbi:SORBI_01g044300|ATP-dependent RNA helicase DHX8/PRP22 [EC:3.6.4.13]	-	-	-	gi|227202738|dbj|BAH56842.1|/3.74465e-09/AT1G62480 [Arabidopsis thaliana]
CL4727.Contig2_NAU-LB	1366	2	36	0.355	5.06743	3.83536	Up	1.28333e-07	8.08831e-07	-	GO:0044464//cell part	-	-	gi|297852228|ref|XP_002893995.1|/0/nodulin MtN21 family protein [Arabidopsis lyrata subsp. lyrata]
Unigene16832_NAU-LB	785	14	250	4.32422	61.236	3.82387	Up	3.59208e-46	1.13973e-44	-	-	-	-	gi|18395194|ref|NP_564187.1|/3.24617e-25/hydroxyproline-rich glycoprotein family protein [Arabidopsis thaliana]
gi|166115712|gb|FD547342.1|FD547342	319	3	53	2.28024	31.9464	3.8084	Up	1.09881e-10	9.19212e-10	-	GO:0043231//intracellular membrane-bounded organelle	GO:0003676//nucleic acid binding;GO:0046914//transition metal ion binding;GO:0001071//nucleic acid binding transcription factor activity;GO:0005515//protein binding	GO:0006970//response to osmotic stress;GO:0006351//transcription, DNA-dependent;GO:0009639//response to red or far red light	gi|312282363|dbj|BAJ34047.1|/1.68459e-13/unnamed protein product [Thellungiella halophila]
Unigene5696_NAU-LB	430	3	51	1.69162	22.8054	3.7529	Up	3.17578e-10	2.55298e-09	-	-	-	-	gi|297811691|ref|XP_002873729.1|/4.42467e-30/ankyrin repeat family protein [Arabidopsis lyrata subsp. lyrata]
CL3391.Contig2_NAU-LB	756	6	102	1.92433	25.9427	3.7529	Up	2.48102e-19	3.51561e-18	-	-	-	-	gi|3152559|gb|AAC17040.1|/1.28971e-100/Similarity to A. thaliana gene product F21M12.20, gb|AC000132. EST gb|Z25651 comes from this gene [Arabidopsis thaliana]
CL9653.Contig2_NAU-LB	1790	16	270	2.16729	29.0033	3.74225	Up	5.81026e-49	1.9457e-47	-	GO:0031410//cytoplasmic vesicle;GO:0043231//intracellular membrane-bounded organelle	-	-	gi|297799288|ref|XP_002867528.1|/0/hypothetical protein ARALYDRAFT_913846 [Arabidopsis lyrata subsp. lyrata]
gnl|UG|Rsa#S42587158	869	3	50	0.837049	11.0633	3.72433	Up	5.39118e-10	4.2697e-09	K13229|1|3e-57|219|zma:541977|2,4-dihydroxy-1,4-benzoxazin-3-one-glucoside dioxygenase [EC:1.14.20.2];K05278|2|1e-32|138|vvi:100249002|flavonol synthase [EC:1.14.11.23]	-	GO:0016641//oxidoreductase activity, acting on the CH-NH2 group of donors, oxygen as acceptor;GO:0016706//oxidoreductase activity, acting on paired donors, with incorporation or reduction of molecular oxygen, 2-oxoglutarate as one donor, and incorporation of one atom each of oxygen into both donors	GO:0008152//metabolic process	gi|15221545|ref|NP_172150.1|/2.35752e-115/1-aminocyclopropane-1-carboxylate oxidase-4 [Arabidopsis thaliana]
gi|156160303|gb|EW720449.1|EW720449	612	6	100	2.37711	31.4184	3.72433	Up	7.12914e-19	9.90259e-18	-	-	GO:0005488//binding	GO:0006950//response to stress	gi|1655828|gb|AAC08050.1|/2.17995e-48/myrosinase-binding protein [Brassica napus]
CL4727.Contig1_NAU-LB	1308	2	33	0.370742	4.85112	3.70983	Up	6.32526e-07	3.69343e-06	-	GO:0044464//cell part	-	-	gi|297852228|ref|XP_002893995.1|/2.71795e-178/nodulin MtN21 family protein [Arabidopsis lyrata subsp. lyrata]
gnl|UG|Rsa#S41988432	974	2	33	0.497875	6.51465	3.70983	Up	6.32526e-07	3.69382e-06	K15280|1|3e-06|50.8|smo:SELMODRAFT_64937|solute carrier family 35, member C2	GO:0016021//integral to membrane	GO:0005337//nucleoside transmembrane transporter activity;GO:0015205//nucleobase transmembrane transporter activity	GO:0009914//hormone transport;GO:0015860//purine nucleoside transmembrane transport;GO:0015851//nucleobase transport;GO:0031323//regulation of cellular metabolic process;GO:0009267//cellular response to starvation	gi|297851264|ref|XP_002893513.1|/1.94134e-116/hypothetical protein ARALYDRAFT_890360 [Arabidopsis lyrata subsp. lyrata]
Unigene19175_NAU-LB	308	4	66	3.1489	41.203	3.70983	Up	8.20036e-13	8.05388e-12	-	-	-	-	-
gi|158663718|gb|EX773609.1|EX773609	796	3	49	0.913814	11.8364	3.69518	Up	9.14278e-10	7.07163e-09	K09286|1|1e-28|124|gmx:100800788|EREBP-like factor	GO:0043231//intracellular membrane-bounded organelle	GO:0003676//nucleic acid binding;GO:0001071//nucleic acid binding transcription factor activity	GO:0000160//two-component signal transduction system (phosphorelay);GO:0006351//transcription, DNA-dependent;GO:0006950//response to stress	gi|15240296|ref|NP_200967.1|/4.89862e-85/ethylene-responsive transcription factor ERF107 [Arabidopsis thaliana]
Unigene5376_NAU-LB	664	3	48	1.09548	13.8998	3.66544	Up	1.54888e-09	1.17994e-08	-	-	-	-	gi|312282307|dbj|BAJ34019.1|/4.05583e-25/unnamed protein product [Thellungiella halophila]
gnl|UG|Rsa#S42020978	840	5	79	1.44325	18.0836	3.64729	Up	6.21004e-15	6.97394e-14	K01115|1|5e-100|362|ath:AT3G05630|phospholipase D [EC:3.1.4.4]	GO:0043231//intracellular membrane-bounded organelle	GO:0004620//phospholipase activity;GO:0016491//oxidoreductase activity	GO:0006644//phospholipid metabolic process;GO:0009725//response to hormone stimulus;GO:0009267//cellular response to starvation;GO:0048513//organ development;GO:0050794//regulation of cellular process;GO:0009247//glycolipid biosynthetic process	gi|42563527|ref|NP_187214.2|/6.47608e-99/phospholipase D P2 [Arabidopsis thaliana]
CL2605.Contig1_NAU-LB	1129	8	126	1.71809	21.4592	3.64272	Up	4.38308e-23	7.27751e-22	-	GO:0016020//membrane	GO:0015205//nucleobase transmembrane transporter activity	GO:0051707//response to other organism;GO:0015851//nucleobase transport	gi|297804354|ref|XP_002870061.1|/5.03266e-122/ATPUP10 [Arabidopsis lyrata subsp. lyrata]
CL4886.Contig1_NAU-LB	1887	11	173	1.41342	17.6283	3.64063	Up	3.32194e-31	7.3105e-30	K01177|1|3e-75|281|sbi:SORBI_01g028700|beta-amylase [EC:3.2.1.2]	-	GO:0043167//ion binding;GO:0016160//amylase activity	GO:0005976//polysaccharide metabolic process	gi|15239531|ref|NP_197368.1|/0/inactive beta-amylase 9 [Arabidopsis thaliana]
Unigene405_NAU-LB	1013	6	93	1.43612	17.6526	3.61963	Up	2.81782e-17	3.61838e-16	K09422|1|3e-89|326|aly:ARALYDRAFT_496112|myb proto-oncogene protein, plant	GO:0043231//intracellular membrane-bounded organelle	GO:0003676//nucleic acid binding;GO:0001071//nucleic acid binding transcription factor activity	GO:0040008//regulation of growth;GO:0012501//programmed cell death;GO:0010038//response to metal ion;GO:0009743//response to carbohydrate stimulus;GO:0006355//regulation of transcription, DNA-dependent;GO:0010476//gibberellin mediated signaling pathway;GO:0009738//abscisic acid mediated signaling pathway;GO:0003006//developmental process involved in reproduction	gi|297796929|ref|XP_002866349.1|/4.06445e-88/hypothetical protein ARALYDRAFT_496112 [Arabidopsis lyrata subsp. lyrata]
Unigene5245_NAU-LB	243	2	31	1.9956	24.5297	3.61963	Up	1.81869e-06	1.00327e-05	K08150|1|3e-07|51.6|aly:ARALYDRAFT_915101|MFS transporter, SP family, solute carrier family 2 (myo-inositol transporter), member 13	-	-	-	gi|297804542|ref|XP_002870155.1|/4.49495e-06/ATINT4 [Arabidopsis lyrata subsp. lyrata]
Unigene9739_NAU-LB	550	2	31	0.881692	10.8376	3.61963	Up	1.81869e-06	1.00337e-05	-	-	GO:0016746//transferase activity, transferring acyl groups	-	gi|15233802|ref|NP_193274.1|/1.5343e-57/HXXXD-type acyl-transferase family protein [Arabidopsis thaliana]
gi|154178955|gb|EV548295.1|EV548295	684	6	93	2.12689	26.1435	3.61963	Up	2.81782e-17	3.61922e-16	K00850|1|6e-80|295|ath:AT5G56630|6-phosphofructokinase [EC:2.7.1.11]	GO:0043234//protein complex;GO:0044444//cytoplasmic part	GO:0008443//phosphofructokinase activity;GO:0032559	GO:0006796//phosphate-containing compound metabolic process;GO:0006007//glucose catabolic process	gi|10176767|dbj|BAB09881.1|/6.74944e-79/pyrophosphate-dependent phosphofructo-1-kinase-like protein [Arabidopsis thaliana]
CL188.Contig4_NAU-LB	1192	46	702	9.35688	113.239	3.5972	Up	4.38842e-121	3.57171e-119	-	-	-	-	gi|312282733|dbj|BAJ34232.1|/1.57907e-113/unnamed protein product [Thellungiella halophila]
CL694.Contig2_NAU-LB	1400	12	183	2.07827	25.1339	3.59617	Up	1.2702e-32	2.92377e-31	K05283|1|3e-11|68.2|aly:ARALYDRAFT_354960|phosphatidylinositol glycan, class W [EC:2.3.-.-];K11982|2|9e-11|66.6|gmx:100787523|E3 ubiquitin-protein ligase RNF115/126 [EC:6.3.2.19];K15692|3|2e-10|65.5|ppp:PHYPADRAFT_16563|E3 ubiquitin-protein ligase RNF13 [EC:6.3.2.19]	GO:0031301//integral to organelle membrane;GO:0009534//chloroplast thylakoid	GO:0046914//transition metal ion binding	GO:0006351//transcription, DNA-dependent;GO:0009314//response to radiation	gi|297832398|ref|XP_002884081.1|/3.60938e-107/zinc finger family protein [Arabidopsis lyrata subsp. lyrata]
gnl|UG|Rsa#S41975062	893	29	440	7.87401	94.7409	3.58882	Up	2.47458e-76	1.28081e-74	K07213|1|1e-40|165|ath:AT3G56240|copper chaperone	GO:0009536//plastid;GO:0016020//membrane	GO:0035091//phosphatidylinositol binding;GO:0046872//metal ion binding;GO:0043565//sequence-specific DNA binding;GO:0016279//protein-lysine N-methyltransferase activity	GO:0009908//flower development;GO:0006351//transcription, DNA-dependent;GO:0030003//cellular cation homeostasis;GO:0034755//iron ion transmembrane transport;GO:0006970//response to osmotic stress;GO:0034968//histone lysine methylation;GO:0006979//response to oxidative stress	gi|15228869|ref|NP_191183.1|/1.28324e-39/copper chaperone [Arabidopsis thaliana]
gi|332786266|gb|FY441794.1|FY441794	613	2	30	0.791077	9.41016	3.57233	Up	3.07644e-06	1.64597e-05	K05279|1|1e-39|160|ath:AT5G54160|flavonol 3-O-methyltransferase [EC:2.1.1.76];K13066|5|1e-36|150|pop:POPTR_824484|caffeic acid 3-O-methyltransferase [EC:2.1.1.68]	GO:0044444//cytoplasmic part	GO:0005515//protein binding;GO:0008168//methyltransferase activity	GO:0006730//one-carbon metabolic process;GO:0009699//phenylpropanoid biosynthetic process	gi|297850544|ref|XP_002893153.1|/1.28128e-80/hypothetical protein ARALYDRAFT_472352 [Arabidopsis lyrata subsp. lyrata]
Unigene7689_NAU-LB	327	2	30	1.48297	17.6404	3.57233	Up	3.07644e-06	1.64581e-05	K07213|1|8e-18|86.7|aly:ARALYDRAFT_486064|copper chaperone	GO:0009536//plastid;GO:0016020//membrane	GO:0035091//phosphatidylinositol binding;GO:0043565//sequence-specific DNA binding;GO:0005507//copper ion binding;GO:0016279//protein-lysine N-methyltransferase activity	GO:0009908//flower development;GO:0006351//transcription, DNA-dependent;GO:0030003//cellular cation homeostasis;GO:0034755//iron ion transmembrane transport;GO:0006970//response to osmotic stress;GO:0034968//histone lysine methylation;GO:0006979//response to oxidative stress	gi|460409110|ref|XP_004249983.1|/5.53804e-17/PREDICTED: copper transport protein ATOX1-like [Solanum lycopersicum]
CL693.Contig2_NAU-LB	3059	3	45	0.237789	2.82858	3.57233	Up	7.4801e-09	5.34256e-08	K14411|1|5e-15|82.0|aly:ARALYDRAFT_478119|RNA-binding protein Musashi	GO:0044421//extracellular region part	GO:0005504//fatty acid binding	-	gi|297813063|ref|XP_002874415.1|/1.48058e-64/hypothetical protein ARALYDRAFT_489637 [Arabidopsis lyrata subsp. lyrata]
gi|332779608|gb|FY438578.1|FY438578	864	3	45	0.841893	10.0146	3.57233	Up	7.4801e-09	5.34187e-08	K13947|1|4e-108|389|aly:ARALYDRAFT_326097|auxin efflux carrier family	GO:0043231//intracellular membrane-bounded organelle;GO:0031224//intrinsic to membrane	GO:0015294//solute:cation symporter activity	GO:0048878//chemical homeostasis;GO:0046907//intracellular transport;GO:0060918//auxin transport	gi|297807677|ref|XP_002871722.1|/5.23248e-107/hypothetical protein ARALYDRAFT_326097 [Arabidopsis lyrata subsp. lyrata]
Unigene6488_NAU-LB	417	11	163	6.39596	75.1602	3.55473	Up	6.11414e-29	1.24543e-27	-	-	-	-	gi|297803370|ref|XP_002869569.1|/3.04318e-07/hypothetical protein ARALYDRAFT_913814 [Arabidopsis lyrata subsp. lyrata]
gi|156178138|gb|EW738284.1|EW738284	716	11	161	3.72502	43.2363	3.53692	Up	1.72755e-28	3.45318e-27	K03093|1|1e-65|247|aly:ARALYDRAFT_489269|RNA polymerase sigma factor	GO:0043231//intracellular membrane-bounded organelle	GO:0003676//nucleic acid binding;GO:0034062//RNA polymerase activity;GO:0001071//nucleic acid binding transcription factor activity;GO:0000996	GO:0006351//transcription, DNA-dependent;GO:0009639//response to red or far red light	gi|312282679|dbj|BAJ34205.1|/7.62445e-68/unnamed protein product [Thellungiella halophila]
Unigene6727_NAU-LB	1062	12	174	2.73972	31.5036	3.52342	Up	1.36707e-30	2.95236e-29	-	GO:0044464//cell part	-	-	gi|297830030|ref|XP_002882897.1|/9.80606e-165/hypothetical protein ARALYDRAFT_478900 [Arabidopsis lyrata subsp. lyrata]
gi|158653843|gb|EX763734.1|EX763734	703	2	29	0.689801	7.93193	3.52342	Up	5.19492e-06	2.69939e-05	-	GO:0044464//cell part	GO:0005488//binding	GO:0009725//response to hormone stimulus;GO:0009414//response to water deprivation	gi|18266043|gb|AAL67434.1|AF458408_1/2.57232e-12/glycine-rich protein [Brassica oleracea]
gi|161547971|gb|EY920629.1|EY920629	650	2	29	0.746047	8.57869	3.52342	Up	5.19492e-06	2.69964e-05	-	GO:0043231//intracellular membrane-bounded organelle	GO:0003676//nucleic acid binding;GO:0001071//nucleic acid binding transcription factor activity	GO:0010038//response to metal ion;GO:0009725//response to hormone stimulus;GO:0048511//rhythmic process;GO:0006970//response to osmotic stress;GO:0006351//transcription, DNA-dependent	gi|297829494|ref|XP_002882629.1|/3.71664e-36/myb family transcription factor [Arabidopsis lyrata subsp. lyrata]
CL2724.Contig2_NAU-LB	2191	4	58	0.442657	5.09005	3.52342	Up	5.42588e-11	4.66903e-10	K01193|1|0.0|1160|ath:AT1G12240|beta-fructofuranosidase [EC:3.2.1.26]	GO:0005618//cell wall;GO:0043231//intracellular membrane-bounded organelle	GO:0004558//alpha-glucosidase activity	GO:0044238//primary metabolic process	gi|11527241|gb|AAG36942.1|AF274298_1/0/acid invertase [Brassica oleracea]
Unigene5173_NAU-LB	1056	4	58	0.918429	10.5609	3.52342	Up	5.42588e-11	4.66975e-10	-	-	-	-	gi|312283329|dbj|BAJ34530.1|/2.2828e-97/unnamed protein product [Thellungiella halophila]
CL8052.Contig1_NAU-LB	695	31	446	10.815	123.392	3.51214	Up	5.2442e-76	2.6893e-74	-	-	GO:0005488//binding	GO:0006950//response to stress	gi|79376496|ref|NP_177240.3|/4.66795e-51/MLP-like protein 28 [Arabidopsis thaliana]
CL7383.Contig3_NAU-LB	1000	12	172	2.90958	33.0723	3.50674	Up	3.85172e-30	8.17538e-29	-	-	-	-	gi|297841499|ref|XP_002888631.1|/3.79353e-30/hypothetical protein ARALYDRAFT_894547 [Arabidopsis lyrata subsp. lyrata]
CL3987.Contig1_NAU-LB	880	39	556	10.7456	121.487	3.49898	Up	4.45462e-94	2.80757e-92	K03517|1|1e-51|201|vvi:100243361|quinolinate synthase [EC:2.5.1.72]	GO:0009536//plastid	-	GO:0031163;GO:0031325//positive regulation of cellular metabolic process	gi|15220546|ref|NP_176947.1|/4.68685e-95/sulfur E2 [Arabidopsis thaliana]
Unigene11737_NAU-LB	999	4	57	0.970832	10.971	3.49833	Up	9.12454e-11	7.69337e-10	K03093|1|9e-124|441|aly:ARALYDRAFT_489269|RNA polymerase sigma factor	-	GO:0034062//RNA polymerase activity;GO:0001071//nucleic acid binding transcription factor activity;GO:0000996	GO:0006351//transcription, DNA-dependent;GO:0009639//response to red or far red light	gi|312282679|dbj|BAJ34205.1|/5.66457e-127/unnamed protein product [Thellungiella halophila]
CL3731.Contig2_NAU-LB	565	3	42	1.28743	14.2934	3.47279	Up	3.57264e-08	2.37929e-07	K05666|1|3e-34|142|olu:OSTLU_35503|ATP-binding cassette, subfamily C (CFTR/MRP), member 2;K02021|2|1e-16|84.3|ath:AT5G03910|putative ABC transport system ATP-binding protein;K05658|5|5e-16|82.0|smo:SELMODRAFT_184079|ATP-binding cassette, subfamily B (MDR/TAP), member 1	GO:0031224//intrinsic to membrane	GO:0017111//nucleoside-triphosphatase activity;GO:0015405;GO:0032559	GO:0006810//transport;GO:0009207	gi|42733544|dbj|BAD11207.1|/1.17048e-95/multidrug resistance-associated protein [Thlaspi caerulescens]
CL4126.Contig1_NAU-LB	730	3	42	0.996432	11.0627	3.47279	Up	3.57264e-08	2.37901e-07	K01166|1|5e-116|414|ath:AT2G02990|ribonuclease T2 [EC:3.1.27.1]	GO:0030312//external encapsulating structure;GO:0016020//membrane;GO:0044421//extracellular region part	GO:0003676//nucleic acid binding;GO:0016892	GO:0009813//flavonoid biosynthetic process;GO:0009267//cellular response to starvation;GO:0007165//signal transduction;GO:0032502//developmental process	gi|116831077|gb|ABK28493.1|/6.63731e-115/unknown [Arabidopsis thaliana]
Unigene5501_NAU-LB	1076	2	28	0.450679	5.00359	3.47279	Up	8.756e-06	4.44063e-05	K01113|1|2e-170|596|aly:ARALYDRAFT_684058|alkaline phosphatase D [EC:3.1.3.1]	GO:0031410//cytoplasmic vesicle	-	-	gi|297791819|ref|XP_002863794.1|/2.99736e-169/predicted protein [Arabidopsis lyrata subsp. lyrata]
gnl|UG|Rsa#S42578565	806	3	42	0.902476	10.0196	3.47279	Up	3.57264e-08	2.37958e-07	K04733|1|1e-26|104|smo:SELMODRAFT_159261|interleukin-1 receptor-associated kinase 4 [EC:2.7.11.1];K00924|4|4e-25|112|aly:ARALYDRAFT_489442|[EC:2.7.1.-]	GO:0044464//cell part	GO:0030246//carbohydrate binding;GO:0004672//protein kinase activity;GO:0019899//enzyme binding;GO:0032559	GO:0006468//protein phosphorylation;GO:0008037//cell recognition	gi|297837339|ref|XP_002886551.1|/1.0002e-100/S-locus lectin protein kinase family protein [Arabidopsis lyrata subsp. lyrata]
Unigene15236_NAU-LB	1384	10	140	1.75192	19.4504	3.47279	Up	1.38073e-24	2.41364e-23	K01476|1|3e-175|613|aly:ARALYDRAFT_489723|arginase [EC:3.5.3.1]	GO:0009536//plastid	GO:0016813//hydrolase activity, acting on carbon-nitrogen (but not peptide) bonds, in linear amidines;GO:0046914//transition metal ion binding	GO:0006952//defense response;GO:0009446//putrescine biosynthetic process;GO:0006525//arginine metabolic process	gi|297813247|ref|XP_002874507.1|/3.36297e-174/arginase [Arabidopsis lyrata subsp. lyrata]
gi|332778064|gb|FY442471.1|FY442471	740	2	28	0.655311	7.27549	3.47279	Up	8.756e-06	4.44022e-05	-	-	-	-	gi|18403283|ref|NP_566699.1|/3.33024e-45/VQ motif-containing protein [Arabidopsis thaliana]
Unigene7553_NAU-LB	315	3	42	2.30919	25.6375	3.47279	Up	3.57264e-08	2.37986e-07	-	-	-	-	gi|297802958|ref|XP_002869363.1|/2.14049e-16/hypothetical protein ARALYDRAFT_491676 [Arabidopsis lyrata subsp. lyrata]
CL6017.Contig2_NAU-LB	1377	54	750	9.50844	104.728	3.4613	Up	3.36246e-125	2.81924e-123	-	-	-	-	gi|297808429|ref|XP_002872098.1|/3.00615e-90/hypothetical protein ARALYDRAFT_351441 [Arabidopsis lyrata subsp. lyrata]
CL8118.Contig2_NAU-LB	1451	7	97	1.16972	12.8541	3.458	Up	2.32602e-17	2.99794e-16	-	-	-	-	gi|15239142|ref|NP_196726.1|/1.49684e-180/alpha/beta fold hydrolase family protein [Arabidopsis thaliana]
CL8653.Contig4_NAU-LB	396	3	41	1.83686	19.9079	3.43803	Up	6.00032e-08	3.91815e-07	K01376|1|1e-58|222|ath:AT3G49340|[EC:3.4.22.-];K01365|2|7e-48|186|rcu:RCOM_1043080|cathepsin L [EC:3.4.22.15]	GO:0044464//cell part	GO:0016491//oxidoreductase activity;GO:0004175//endopeptidase activity	GO:0019538//protein metabolic process	gi|18401420|ref|NP_565649.1|/8.62831e-58/cysteine proteinase-like protein [Arabidopsis thaliana]
CL3857.Contig1_NAU-LB	1131	5	68	1.07191	11.5607	3.43097	Up	1.90229e-12	1.82826e-11	K15397|1|0.0|728|ath:AT1G68530|3-ketoacyl-CoA synthase [EC:2.3.1.-]	GO:0043231//intracellular membrane-bounded organelle	GO:0004312//fatty acid synthase activity	GO:0009314//response to radiation;GO:0006633//fatty acid biosynthetic process;GO:0000902//cell morphogenesis;GO:0007275//multicellular organismal development;GO:0003006//developmental process involved in reproduction;GO:0006950//response to stress	gi|15221431|ref|NP_177020.1|/0/3-ketoacyl-CoA synthase 6 [Arabidopsis thaliana]
gi|158641314|gb|EX751205.1|EX751205	667	2	27	0.727032	7.78348	3.42033	Up	1.47292e-05	7.20187e-05	-	GO:0044464//cell part	-	-	gi|15241137|ref|NP_197460.1|/2.95361e-57/uncharacterized protein [Arabidopsis thaliana]
CL7988.Contig1_NAU-LB	955	2	27	0.507781	5.43621	3.42033	Up	1.47292e-05	7.20123e-05	K13068|1|1e-74|278|ath:AT3G21560|sinapate 1-glucosyltransferase [EC:2.4.1.120];K13692|5|2e-30|131|pop:POPTR_767628|UDP-glucose:(indol-3-yl)acetate beta-D-glucosyltransferase [EC:2.4.1.121]	GO:0044424//intracellular part	GO:0035251//UDP-glucosyltransferase activity	GO:0009411//response to UV	gi|297800632|ref|XP_002868200.1|/5.90744e-86/hypothetical protein ARALYDRAFT_493341 [Arabidopsis lyrata subsp. lyrata]
CL2761.Contig2_NAU-LB	931	2	27	0.52087	5.57635	3.42033	Up	1.47292e-05	7.2006e-05	-	-	-	-	-
CL8521.Contig1_NAU-LB	980	11	148	2.72155	29.0383	3.41546	Up	1.421e-25	2.58651e-24	-	-	-	-	gi|18396693|ref|NP_566215.1|/4.25074e-95/uncharacterized protein [Arabidopsis thaliana]
Unigene24886_NAU-LB	216	4	53	4.4901	47.18	3.39336	Up	7.21924e-10	5.64908e-09	-	-	-	-	-
CL7571.Contig2_NAU-LB	1896	241	3188	30.8197	323.308	3.39098	Up	0	0	K01953|1|2e-10|66.2|ppp:PHYPADRAFT_173106|asparagine synthase (glutamine-hydrolysing) [EC:6.3.5.4]	GO:0009536//plastid	GO:0016772//transferase activity, transferring phosphorus-containing groups	GO:0006796//phosphate-containing compound metabolic process	gi|18419840|ref|NP_568369.1|/1.6128e-164/pfkB-like carbohydrate kinase family protein [Arabidopsis thaliana]
Unigene15886_NAU-LB	510	12	158	5.70506	59.5694	3.38426	Up	5.20068e-27	9.97242e-26	K07304|1|4e-36|148|gmx:100804748|peptide-methionine (S)-S-oxide reductase [EC:1.8.4.11]	GO:0044444//cytoplasmic part	GO:0016671//oxidoreductase activity, acting on a sulfur group of donors, disulfide as acceptor	GO:0006979//response to oxidative stress;GO:0009628//response to abiotic stimulus;GO:0043412//macromolecule modification	gi|38260671|gb|AAR15485.1|/1.46415e-53/peptide methionine sulfoxide reductase [Arabidopsis arenosa]
Unigene12168_NAU-LB	2072	72	937	8.42543	86.9533	3.36742	Up	2.34328e-152	2.37702e-150	K13415|1|3e-07|55.8|sbi:SORBI_03g012040|protein brassinosteroid insensitive 1 [EC:2.7.10.1 2.7.11.1];K13420|5|6e-06|51.2|pop:POPTR_1075175|LRR receptor-like serine/threonine-protein kinase FLS2 [EC:2.7.11.1]	GO:0043231//intracellular membrane-bounded organelle	-	-	gi|79384765|ref|NP_177947.3|/0/Outer arm dynein light chain 1 protein [Arabidopsis thaliana]
Unigene20886_NAU-LB	1492	2	26	0.32502	3.35074	3.36588	Up	2.47252e-05	0.000117094	K00517|1|1e-48|192|aly:ARALYDRAFT_323436|[EC:1.14.-.-];K10523|3|1e-09|62.8|sbi:SORBI_07g006510|speckle-type POZ protein	GO:0009536//plastid	GO:0005515//protein binding	GO:0009725//response to hormone stimulus;GO:0000302//response to reactive oxygen species;GO:0048229//gametophyte development;GO:0006970//response to osmotic stress	gi|297843356|ref|XP_002889559.1|/4.41574e-151/hypothetical protein ARALYDRAFT_887760 [Arabidopsis lyrata subsp. lyrata]
gi|167490190|gb|FD971378.1|FD971378	740	2	25	0.655311	6.49598	3.30929	Up	4.14124e-05	0.000190034	-	-	GO:0046872//metal ion binding	-	gi|145334817|ref|NP_001078754.1|/5.09993e-126/calcium-binding endonuclease/exonuclease/phosphatase family protein [Arabidopsis thaliana]
Unigene24161_NAU-LB	315	4	50	3.07892	30.5208	3.30929	Up	3.36376e-09	2.49118e-08	K11000|1|6e-20|93.6|ath:AT3G14570|callose synthase [EC:2.4.1.-]	GO:0043234//protein complex;GO:0044464//cell part	GO:0035251//UDP-glucosyltransferase activity	GO:0006074//(1->3)-beta-D-glucan metabolic process	gi|9294379|dbj|BAB02389.1|/1.02309e-18/glucan synthase-like protein [Arabidopsis thaliana]
CL6504.Contig1_NAU-LB	573	2	25	0.846301	8.38922	3.30929	Up	4.14124e-05	0.000190018	-	-	-	-	-
gi|156165785|gb|EW725931.1|EW725931	436	2	25	1.11223	11.0253	3.30929	Up	4.14124e-05	0.000190066	-	-	-	-	-
gi|158647627|gb|EX757518.1|EX757518	514	2	25	0.943444	9.35218	3.30929	Up	4.14124e-05	0.00019005	-	-	-	-	gi|312282965|dbj|BAJ34348.1|/2.78055e-28/unnamed protein product [Thellungiella halophila]
Unigene27465_NAU-LB	455	3	37	1.59867	15.636	3.28993	Up	4.70226e-07	2.76724e-06	-	GO:0044464//cell part	GO:0046872//metal ion binding;GO:0032561//guanyl ribonucleotide binding;GO:0017111//nucleoside-triphosphatase activity	GO:0009207	gi|8439910|gb|AAF75096.1|AC007583_32/2.56776e-52/It is a member of GTP1/OBG family PF|01018 [Arabidopsis thaliana]
gi|158917799|gb|EX890653.1|EX890653	704	3	37	1.03323	10.1057	3.28993	Up	4.70226e-07	2.76754e-06	K05016|1|1e-64|244|sbi:SORBI_04g022890|chloride channel 7	GO:0000325//plant-type vacuole;GO:0031224//intrinsic to membrane	GO:0005254//chloride channel activity;GO:0015078//hydrogen ion transmembrane transporter activity;GO:0015103//inorganic anion transmembrane transporter activity	GO:0015698//inorganic anion transport;GO:0010035//response to inorganic substance	gi|15232105|ref|NP_189353.1|/3.73833e-104/chloride channel protein CLC-b [Arabidopsis thaliana]
CL7603.Contig1_NAU-LB	562	7	86	3.02003	29.4238	3.28435	Up	6.5188e-15	7.30592e-14	-	-	-	-	-
CL2894.Contig1_NAU-LB	1512	85	1043	13.6307	132.638	3.28257	Up	1.28453e-165	1.40839e-163	-	GO:0009536//plastid	GO:0004175//endopeptidase activity	GO:0019538//protein metabolic process	gi|297814950|ref|XP_002875358.1|/2.71001e-164/peptidase M48 family protein [Arabidopsis lyrata subsp. lyrata]
gnl|UG|Rsa#S43014515	846	4	49	1.14641	11.1368	3.28015	Up	5.60378e-09	4.05663e-08	-	-	-	-	gi|15237472|ref|NP_198885.1|/1.57842e-63/uncharacterized protein [Arabidopsis thaliana]
CL4002.Contig1_NAU-LB	1231	11	134	2.16663	20.9307	3.2721	Up	1.79817e-22	2.91509e-21	K03294|1|8e-143|504|sbi:SORBI_08g021380|basic amino acid/polyamine antiporter, APA family	GO:0031224//intrinsic to membrane	GO:0015174//basic amino acid transmembrane transporter activity;GO:0015172//acidic amino acid transmembrane transporter activity	GO:0015813//L-glutamate transport;GO:0015809//arginine transport	gi|297804044|ref|XP_002869906.1|/0/hypothetical protein ARALYDRAFT_329490 [Arabidopsis lyrata subsp. lyrata]
CL5094.Contig2_NAU-LB	1088	2	24	0.445708	4.24149	3.2504	Up	6.91956e-05	0.000303664	K10615|1|2e-15|81.6|cme:CMB070C|E3 ubiquitin-protein ligase HERC4 [EC:6.3.2.19];K11493|3|2e-09|61.6|ota:Ot03g05690|regulator of chromosome condensation	-	GO:0017016//Ras GTPase binding	-	gi|334185962|ref|NP_190951.2|/1.58421e-125/Regulator of chromosome condensation (RCC1) family protein [Arabidopsis thaliana]
gi|158650496|gb|EX760387.1|EX760387	752	2	24	0.644854	6.13662	3.2504	Up	6.91956e-05	0.000303688	K15889|1|2e-110|396|aly:ARALYDRAFT_488435|prenylcysteine alpha-carboxyl methylesterase [EC:3.1.1.-]	GO:0044464//cell part	GO:0051723	-	gi|297811725|ref|XP_002873746.1|/1.95459e-109/predicted protein [Arabidopsis lyrata subsp. lyrata]
Unigene17873_NAU-LB	1377	3	36	0.528247	5.02695	3.2504	Up	7.8348e-07	4.53109e-06	-	GO:0016020//membrane	GO:0015197//peptide transporter activity	GO:0006810//transport	gi|189163712|gb|ACD77012.1|/0/metal transporter protein [Brassica juncea]
Unigene745_NAU-LB	1291	4	48	0.751248	7.1491	3.2504	Up	9.32268e-09	6.58834e-08	K14493|1|2e-155|546|ath:AT3G63010|gibberellin receptor GID1 [EC:3.-.-.-]	-	GO:0005488//binding;GO:0004871//signal transducer activity;GO:0003824//catalytic activity	GO:0009312//oligosaccharide biosynthetic process;GO:0003006//developmental process involved in reproduction;GO:0009740//gibberellic acid mediated signaling pathway	gi|315075933|gb|ADT78692.1|/9.53154e-168/gibberellin receptor 1B [Brassica napus]
gnl|UG|Rsa#S42574226	797	2	24	0.608445	5.79014	3.2504	Up	6.91956e-05	0.000303616	K05282|1|2e-80|296|aly:ARALYDRAFT_487543|gibberellin 20-oxidase [EC:1.14.11.12]	-	GO:0016706//oxidoreductase activity, acting on paired donors, with incorporation or reduction of molecular oxygen, 2-oxoglutarate as one donor, and incorporation of one atom each of oxygen into both donors	GO:0009685//gibberellin metabolic process	gi|297810833|ref|XP_002873300.1|/3.07542e-79/YAP169 [Arabidopsis lyrata subsp. lyrata]
gnl|UG|Rsa#S42023633	778	2	24	0.623304	5.93154	3.2504	Up	6.91956e-05	0.00030364	-	-	-	GO:0009725//response to hormone stimulus;GO:0006972//hyperosmotic response;GO:0009791//post-embryonic development;GO:0048229//gametophyte development;GO:0006914//autophagy	gi|18416458|ref|NP_567713.1|/1.03906e-41/HVA22-like protein d [Arabidopsis thaliana]
Unigene12281_NAU-LB	736	3	36	0.988309	9.40504	3.2504	Up	7.8348e-07	4.53156e-06	K05283|1|5e-08|56.2|aly:ARALYDRAFT_354960|phosphatidylinositol glycan, class W [EC:2.3.-.-];K15692|2|7e-07|52.4|sbi:SORBI_06g034040|E3 ubiquitin-protein ligase RNF13 [EC:6.3.2.19];K11982|3|1e-06|51.6|gmx:100797565|E3 ubiquitin-protein ligase RNF115/126 [EC:6.3.2.19]	-	GO:0046914//transition metal ion binding	GO:0009743//response to carbohydrate stimulus	gi|297798936|ref|XP_002867352.1|/9.2884e-48/zinc finger family protein [Arabidopsis lyrata subsp. lyrata]
CL396.Contig2_NAU-LB	872	19	224	5.28307	49.3933	3.22486	Up	3.33972e-36	8.36646e-35	K00799|1|6e-96|348|ath:AT2G02930|glutathione S-transferase [EC:2.5.1.18]	GO:0009532//plastid stroma;GO:0005576//extracellular region;GO:0016020//membrane	GO:0042277//peptide binding;GO:0016765//transferase activity, transferring alkyl or aryl (other than methyl) groups	GO:0006952//defense response;GO:0006970//response to osmotic stress;GO:0009404//toxin metabolic process;GO:0010038//response to metal ion	gi|31790105|gb|AAP58396.1|/5.29591e-107/glutathione S-transferase 6 [Brassica juncea]
CL2721.Contig2_NAU-LB	976	9	106	2.23585	20.883	3.22343	Up	8.09638e-18	1.0693e-16	-	GO:0043231//intracellular membrane-bounded organelle	-	GO:0010647//positive regulation of cell communication;GO:0009267//cellular response to starvation	gi|297808083|ref|XP_002871925.1|/1.65109e-99/SPX domain-containing protein [Arabidopsis lyrata subsp. lyrata]
Unigene26488_NAU-LB	398	4	47	2.43684	22.7065	3.22003	Up	1.54875e-08	1.07415e-07	-	-	-	-	gi|15219703|ref|NP_171928.1|/6.65259e-34/uncharacterized protein [Arabidopsis thaliana]
gi|332780440|gb|FY443023.1|FY443023	790	7	82	2.14843	19.9583	3.21563	Up	4.94326e-14	5.2652e-13	K13449|1|3e-57|219|rcu:RCOM_1381930|pathogenesis-related protein 1	GO:0044464//cell part	-	GO:0009725//response to hormone stimulus	gi|11692906|gb|AAG40056.1|AF324705_1/9.77758e-70/AT4g33720 [Arabidopsis thaliana]
CL10061.Contig2_NAU-LB	1430	3	35	0.508668	4.70618	3.20976	Up	1.30303e-06	7.30696e-06	-	-	GO:0001071//nucleic acid binding transcription factor activity	GO:0006950//response to stress	gi|157849714|gb|ABV89640.1|/1.77387e-101/heat shock factor 4 [Brassica rapa]
gi|154255963|gb|EV567012.1|EV567012	787	3	35	0.924264	8.55125	3.20976	Up	1.30303e-06	7.30622e-06	K14638|1|6e-40|94.0|ppp:PHYPADRAFT_189464|solute carrier family 15 (peptide/histidine transporter), member 3/4	GO:0016020//membrane	-	GO:0015833//peptide transport;GO:0009628//response to abiotic stimulus	gi|75180586|sp|Q9LV10.1|PTR53_ARATH/4.88322e-123/RecName: Full=Probable peptide/nitrate transporter At5g62680
CL3987.Contig2_NAU-LB	331	3	35	2.19757	20.3318	3.20976	Up	1.30303e-06	7.3077e-06	-	GO:0009536//plastid	-	GO:0031163;GO:0031325//positive regulation of cellular metabolic process	gi|297838529|ref|XP_002887146.1|/2.6555e-14/Fe-S metabolism associated domain-containing protein [Arabidopsis lyrata subsp. lyrata]
Unigene19186_NAU-LB	1852	2303	26527	301.51	2754.12	3.19131	Up	0	0	-	-	-	-	-
gi|158642558|gb|EX752449.1|EX752449	383	2	23	1.26614	11.5469	3.189	Up	0.000115321	0.000484038	-	GO:0044464//cell part	GO:0046914//transition metal ion binding	GO:0009725//response to hormone stimulus;GO:0009743//response to carbohydrate stimulus	gi|15233117|ref|NP_191705.1|/4.85898e-29/brassinosteroid-responsive RING-H2 [Arabidopsis thaliana]
gi|167438659|gb|FD944718.1|FD944718	722	2	23	0.671649	6.12529	3.189	Up	0.000115321	0.000484075	-	GO:0031224//intrinsic to membrane;GO:0031090//organelle membrane;GO:0043231//intracellular membrane-bounded organelle	GO:0016491//oxidoreductase activity	GO:0044238//primary metabolic process	gi|186495126|ref|NP_001117598.1|/3.96431e-80/uncharacterized protein [Arabidopsis thaliana]
CL8521.Contig2_NAU-LB	1015	4	46	0.955528	8.71421	3.189	Up	2.56908e-08	1.74823e-07	-	-	-	-	gi|18396693|ref|NP_566215.1|/2.73914e-84/uncharacterized protein [Arabidopsis thaliana]
Unigene21238_NAU-LB	1122	35	399	7.56353	68.378	3.1764	Up	1.73371e-62	7.39643e-61	K14548|1|4e-74|276|rcu:RCOM_0962120|U3 small nucleolar RNA-associated protein 4	GO:0044464//cell part	GO:0048037//cofactor binding;GO:0016846//carbon-sulfur lyase activity	-	gi|18399111|ref|NP_564435.1|/1.72379e-106/Pyridoxal phosphate-dependent transferase domain-containing protein [Arabidopsis thaliana]
CL4517.Contig2_NAU-LB	951	10	114	2.54958	23.0494	3.1764	Up	7.83056e-19	1.08525e-17	K01078|1|9e-73|271|ath:AT1G14700|acid phosphatase [EC:3.1.3.2]	GO:0044464//cell part	GO:0016791//phosphatase activity	GO:0072502;GO:0006796//phosphate-containing compound metabolic process;GO:0000302//response to reactive oxygen species	gi|295854819|gb|ADG45866.1|/7.8512e-123/purple acid phosphatase 17 isoform 1 [Brassica rapa]
gnl|UG|Rsa#S42569180	765	3	34	0.950844	8.54582	3.16794	Up	2.16292e-06	1.17405e-05	-	-	-	-	gi|22327834|ref|NP_680435.1|/2.68185e-45/uncharacterized protein [Arabidopsis thaliana]
gnl|UG|Rsa#S42588725	632	41	464	15.7295	141.168	3.16587	Up	3.39166e-72	1.64663e-70	-	GO:0044464//cell part	GO:0005488//binding	GO:0051234//establishment of localization;GO:0010876//lipid localization	gi|18402345|ref|NP_564532.1|/5.8439e-31/bifunctional inhibitor/lipid-transfer protein/seed storage 2S albumin-like protein [Arabidopsis thaliana]
gi|161567243|gb|EY938547.1|EY938547	784	7	79	2.16487	19.3752	3.16186	Up	2.23796e-13	2.28226e-12	K01408|1|5e-84|308|ath:AT2G41790|insulysin [EC:3.4.24.56]	-	GO:0046914//transition metal ion binding;GO:0004175//endopeptidase activity	GO:0019538//protein metabolic process	gi|297820542|ref|XP_002878154.1|/2.26717e-87/hypothetical protein ARALYDRAFT_907214 [Arabidopsis lyrata subsp. lyrata]
Unigene13650_NAU-LB	1228	7	79	1.38213	12.3699	3.16186	Up	2.23796e-13	2.28184e-12	K00540|1|2e-118|424|ath:AT3G22370|[EC:1.-.-.-]	GO:0031967;GO:0031224//intrinsic to membrane	GO:0043169//cation binding;GO:0016682//oxidoreductase activity, acting on diphenols and related substances as donors, oxygen as acceptor	GO:0032501//multicellular organismal process;GO:0006091//generation of precursor metabolites and energy	gi|18398395|ref|NP_564395.1|/3.87663e-171/alternative oxidase 3 [Arabidopsis thaliana]
gi|158646025|gb|EX755916.1|EX755916	780	4	45	1.24341	11.0931	3.15729	Up	4.2551e-08	2.81357e-07	-	-	-	-	gi|334186016|ref|NP_001190104.1|/1.54562e-27/uncharacterized protein [Arabidopsis thaliana]
CL10125.Contig1_NAU-LB	1554	19	210	2.9645	25.9839	3.13176	Up	3.71662e-33	8.65172e-32	K00924|1|3e-83|307|osa:4342410|[EC:2.7.1.-];K07198|3|1e-51|202|ppp:PHYPADRAFT_228852|5'-AMP-activated protein kinase, catalytic alpha subunit [EC:2.7.11.11]	GO:0043231//intracellular membrane-bounded organelle	GO:0005515//protein binding;GO:0004672//protein kinase activity;GO:0032559	GO:0050896//response to stimulus;GO:0006464//cellular protein modification process;GO:0023052//signaling	gi|297806025|ref|XP_002870896.1|/1.13879e-173/hypothetical protein ARALYDRAFT_486886 [Arabidopsis lyrata subsp. lyrata]
gi|161556222|gb|EY927971.1|EY927971	840	2	22	0.577298	5.03593	3.12487	Up	0.000191664	0.000787466	-	GO:0016020//membrane	-	-	gi|15218522|ref|NP_172512.1|/5.44432e-122/uncharacterized protein [Arabidopsis thaliana]
CL3751.Contig1_NAU-LB	1056	4	44	0.918429	8.0117	3.12487	Up	7.0363e-08	4.56674e-07	K13229|1|3e-37|154|zma:541977|2,4-dihydroxy-1,4-benzoxazin-3-one-glucoside dioxygenase [EC:1.14.20.2];K06892|2|5e-31|133|pop:POPTR_550478|;K00475|3|6e-28|123|aly:ARALYDRAFT_485476|naringenin 3-dioxygenase [EC:1.14.11.9]	-	GO:0016641//oxidoreductase activity, acting on the CH-NH2 group of donors, oxygen as acceptor;GO:0016706//oxidoreductase activity, acting on paired donors, with incorporation or reduction of molecular oxygen, 2-oxoglutarate as one donor, and incorporation of one atom each of oxygen into both donors	GO:0008152//metabolic process	gi|75311542|sp|Q9LSW7.1|ACCH9_ARATH/5.99469e-90/RecName: Full=1-aminocyclopropane-1-carboxylate oxidase homolog 9
Unigene4569_NAU-LB	601	17	186	6.85842	59.5079	3.11713	Up	2.11064e-29	4.35841e-28	-	-	-	-	gi|15224369|ref|NP_181316.1|/1.04985e-39/cysteine/histidine-rich C1 domain-containing protein [Arabidopsis thaliana]
Unigene4448_NAU-LB	720	12	128	4.04109	34.1833	3.08048	Up	1.95494e-20	2.92053e-19	-	GO:0044464//cell part	GO:0043169//cation binding;GO:0016791//phosphatase activity	-	gi|30017267|gb|AAP12867.1|/2.30457e-80/At3g52820 [Arabidopsis thaliana]
CL8653.Contig3_NAU-LB	474	6	64	3.06918	25.962	3.08048	Up	7.93906e-11	6.72341e-10	K01376|1|4e-49|191|ath:AT3G49340|[EC:3.4.22.-];K01365|2|1e-37|153|pop:POPTR_771658|cathepsin L [EC:3.4.22.15]	GO:0044464//cell part	GO:0016491//oxidoreductase activity;GO:0004175//endopeptidase activity	GO:0019538//protein metabolic process	gi|297819568|ref|XP_002877667.1|/1.79676e-49/hypothetical protein ARALYDRAFT_348033 [Arabidopsis lyrata subsp. lyrata]
CL1710.Contig4_NAU-LB	997	6	64	1.45917	12.343	3.08048	Up	7.93906e-11	6.72443e-10	K13413|1|1e-134|477|aly:ARALYDRAFT_474280|mitogen-activated protein kinase kinase 4/5, plant [EC:2.7.12.2]	GO:0043231//intracellular membrane-bounded organelle	GO:0004712//protein serine/threonine/tyrosine kinase activity;GO:0032559	GO:0051707//response to other organism;GO:0007243//intracellular protein kinase cascade;GO:0010374//stomatal complex development;GO:0010375//stomatal complex patterning;GO:0003006//developmental process involved in reproduction;GO:0006464//cellular protein modification process	gi|312281759|dbj|BAJ33745.1|/2.06522e-137/unnamed protein product [Thellungiella halophila]
gi|161541300|gb|EY913843.1|EY913843	694	3	32	1.04812	8.86598	3.08048	Up	5.92286e-06	3.06275e-05	-	-	-	-	gi|297841499|ref|XP_002888631.1|/3.13881e-07/hypothetical protein ARALYDRAFT_894547 [Arabidopsis lyrata subsp. lyrata]
Unigene20556_NAU-LB	728	17	181	5.66196	47.8061	3.07782	Up	2.52894e-28	5.03154e-27	K12135|1|6e-46|182|aly:ARALYDRAFT_488429|zinc finger protein CONSTANS	GO:0044464//cell part	GO:0046914//transition metal ion binding	-	gi|22854916|gb|AAN09813.1|/4.6013e-84/COL1 protein [Brassica nigra]
CL1290.Contig1_NAU-LB	987	19	202	4.66752	39.3523	3.07572	Up	1.97944e-31	4.38387e-30	-	-	-	-	gi|297810725|ref|XP_002873246.1|/3.59532e-33/hypothetical protein ARALYDRAFT_487437 [Arabidopsis lyrata subsp. lyrata]
Unigene8125_NAU-LB	1415	20	212	3.42707	28.8082	3.07143	Up	7.10792e-33	1.64224e-31	-	-	-	-	gi|18410446|ref|NP_565071.1|/1.16109e-176/esterase/lipase domain-containing protein [Arabidopsis thaliana]
Unigene4388_NAU-LB	882	5	53	1.37452	11.5543	3.07143	Up	3.862e-09	2.83674e-08	-	GO:0009536//plastid	-	-	gi|357436159|ref|XP_003588355.1|/2.34391e-59/Mitochondrial protein, putative [Medicago truncatula]
CL7834.Contig1_NAU-LB	289	4	42	3.35592	27.9439	3.05775	Up	1.91432e-07	1.18529e-06	-	GO:0044464//cell part	GO:0046914//transition metal ion binding;GO:0001071//nucleic acid binding transcription factor activity	GO:0006351//transcription, DNA-dependent;GO:0006950//response to stress	gi|297803370|ref|XP_002869569.1|/3.74262e-13/hypothetical protein ARALYDRAFT_913814 [Arabidopsis lyrata subsp. lyrata]
CL4077.Contig3_NAU-LB	875	16	166	4.43365	36.4784	3.04048	Up	8.39024e-26	1.54337e-24	-	GO:0005618//cell wall	GO:0016788//hydrolase activity, acting on ester bonds;GO:0016747//transferase activity, transferring acyl groups other than amino-acyl groups	GO:0000003//reproduction	gi|297806977|ref|XP_002871372.1|/7.65172e-90/hypothetical protein ARALYDRAFT_487757 [Arabidopsis lyrata subsp. lyrata]
Unigene19408_NAU-LB	655	24	247	8.88422	72.509	3.02884	Up	1.40395e-37	3.65205e-36	-	-	GO:0030247//polysaccharide binding	GO:0006952//defense response	gi|73671284|gb|AAN23106.2|/1.16853e-69/PR4-type protein [Brassica rapa subsp. pekinensis]
Unigene14359_NAU-LB	355	7	72	4.781	38.9978	3.02801	Up	7.33008e-12	6.77651e-11	K08286|1|4e-23|104|ath:AT3G08730|protein-serine/threonine kinase [EC:2.7.11.-];K04688|2|8e-23|103|aly:ARALYDRAFT_478175|p70 ribosomal S6 kinase [EC:2.7.11.1];K08282|5|1e-09|59.3|osa:4332748|non-specific serine/threonine protein kinase [EC:2.7.11.1]	GO:0043231//intracellular membrane-bounded organelle	GO:0004672//protein kinase activity;GO:0032559	GO:0006412//translation;GO:0006970//response to osmotic stress;GO:0006464//cellular protein modification process	gi|15231960|ref|NP_187485.1|/5.74043e-22/serine/threonine-protein kinase AtPK1/AtPK6 [Arabidopsis thaliana]
Unigene8929_NAU-LB	563	5	51	2.15333	17.418	3.01593	Up	1.04322e-08	7.35932e-08	K00676|1|2e-14|76.6|ppp:PHYPADRAFT_104139|ribosomal-protein-alanine N-acetyltransferase [EC:2.3.1.128]	GO:0044464//cell part	GO:0016407//acetyltransferase activity	-	gi|15228792|ref|NP_188895.1|/1.13898e-74/GCN5-related N-acetyltransferase (GNAT) family protein [Arabidopsis thaliana]
CL1974.Contig1_NAU-LB	1348	5	51	0.899352	7.27472	3.01593	Up	1.04322e-08	7.36025e-08	K05279|1|3e-79|293|ath:AT5G54160|flavonol 3-O-methyltransferase [EC:2.1.1.76];K13066|5|7e-72|269|pop:POPTR_824484|caffeic acid 3-O-methyltransferase [EC:2.1.1.68]	GO:0044444//cytoplasmic part	GO:0005515//protein binding;GO:0008168//methyltransferase activity	GO:0006730//one-carbon metabolic process;GO:0009699//phenylpropanoid biosynthetic process	gi|15218138|ref|NP_173537.1|/8.8343e-180/O-methyltransferase-like protein [Arabidopsis thaliana]
gi|158642710|gb|EX752601.1|EX752601	779	5	50	1.55626	12.3415	2.98737	Up	1.7106e-08	1.17861e-07	-	-	GO:0005488//binding	GO:0006950//response to stress	gi|33285912|gb|AAQ01572.1|/6.60969e-55/putative myrosinase-binding protein 3 [Brassica rapa subsp. pekinensis]
gnl|UG|Rsa#S42017614	817	3	30	0.890325	7.0605	2.98737	Up	1.60731e-05	7.8383e-05	-	GO:0016020//membrane;GO:0009536//plastid	-	-	gi|334188092|ref|NP_198861.4|/1.22409e-46/uncharacterized protein [Arabidopsis thaliana]
gi|154178850|gb|EV548190.1|EV548190	773	7	69	2.19567	17.1635	2.96661	Up	3.21622e-11	2.81687e-10	K14488|1|3e-45|179|aly:ARALYDRAFT_478646|SAUR family protein	-	-	GO:0009725//response to hormone stimulus	gi|297834094|ref|XP_002884929.1|/3.9606e-44/auxin-responsive family protein [Arabidopsis lyrata subsp. lyrata]
gi|158639168|gb|EX749059.1|EX749059	808	5	49	1.5004	11.6606	2.95822	Up	2.8004e-08	1.89936e-07	-	GO:0043231//intracellular membrane-bounded organelle	-	GO:0010647//positive regulation of cell communication;GO:0009267//cellular response to starvation	gi|297808083|ref|XP_002871925.1|/3.83041e-67/SPX domain-containing protein [Arabidopsis lyrata subsp. lyrata]
gi|158638215|gb|EX748106.1|EX748106	553	8	78	3.50763	27.121	2.95084	Up	1.80862e-12	1.73944e-11	-	-	-	-	gi|79487047|ref|NP_194504.2|/4.17154e-50/yippee-like protein [Arabidopsis thaliana]
Unigene20577_NAU-LB	494	3	29	1.47246	11.2877	2.93846	Up	2.63798e-05	0.000124042	-	-	GO:0005488//binding	-	gi|297849128|ref|XP_002892445.1|/2.7941e-35/hypothetical protein ARALYDRAFT_888049 [Arabidopsis lyrata subsp. lyrata]
gi|161514692|gb|EY894739.1|EY894739	827	3	29	0.879559	6.74262	2.93846	Up	2.63798e-05	0.000124032	K09338|1|6e-99|358|aly:ARALYDRAFT_486694|homeobox-leucine zipper protein	GO:0043231//intracellular membrane-bounded organelle	GO:0001071//nucleic acid binding transcription factor activity;GO:0003677//DNA binding	GO:0006355//regulation of transcription, DNA-dependent;GO:0006970//response to osmotic stress;GO:0009755//hormone-mediated signaling pathway	gi|297821072|ref|XP_002878419.1|/6.97655e-98/ATHB-12 [Arabidopsis lyrata subsp. lyrata]
Unigene5163_NAU-LB	1249	15	145	2.91191	22.3224	2.93846	Up	5.19798e-22	8.28888e-21	-	-	-	-	gi|297794007|ref|XP_002864888.1|/6.22956e-116/hypothetical protein ARALYDRAFT_496623 [Arabidopsis lyrata subsp. lyrata]
CL5542.Contig1_NAU-LB	2440	21	201	2.08679	15.8395	2.92417	Up	7.59378e-30	1.59295e-28	K00276|1|8e-72|270|cme:CMS002C|primary-amine oxidase [EC:1.4.3.21]	GO:0043231//intracellular membrane-bounded organelle	GO:0046914//transition metal ion binding;GO:0016641//oxidoreductase activity, acting on the CH-NH2 group of donors, oxygen as acceptor;GO:0048037//cofactor binding	GO:0006807//nitrogen compound metabolic process	gi|240255790|ref|NP_192966.5|/0/copper amine oxidase family protein [Arabidopsis thaliana]
Unigene23999_NAU-LB	1526	7	67	1.11223	8.44221	2.92417	Up	8.5677e-11	7.23485e-10	-	GO:0043231//intracellular membrane-bounded organelle	GO:0008194//UDP-glycosyltransferase activity	GO:0010393;GO:0033692//cellular polysaccharide biosynthetic process	gi|42568129|ref|NP_198314.2|/0/xylogalacturonan beta-1,3-xylosyltransferase [Arabidopsis thaliana]
CL125.Contig3_NAU-LB	1139	15	143	3.19313	24.1406	2.91842	Up	1.37609e-21	2.15601e-20	-	-	GO:0046872//metal ion binding	GO:0009743//response to carbohydrate stimulus	gi|18404102|ref|NP_565844.1|/1.61935e-59/zinc finger A20 and AN1 domain-containing stress-associated protein 4 [Arabidopsis thaliana]
gi|332786197|gb|FY441725.1|FY441725	840	71	668	20.4941	152.909	2.89939	Up	6.87728e-95	4.39427e-93	K01953|1|4e-10|63.5|ppp:PHYPADRAFT_173106|asparagine synthase (glutamine-hydrolysing) [EC:6.3.5.4]	GO:0016020//membrane	-	GO:0009725//response to hormone stimulus;GO:0010038//response to metal ion	gi|157849696|gb|ABV89631.1|/6.03338e-113/aluminum-induced protein [Brassica rapa]
CL7769.Contig2_NAU-LB	1257	87	809	16.7816	123.751	2.88249	Up	6.78816e-114	5.19762e-112	K14493|1|3e-39|160|ppp:PHYPADRAFT_118478|gibberellin receptor GID1 [EC:3.-.-.-]	-	GO:0016788//hydrolase activity, acting on ester bonds	-	gi|297797183|ref|XP_002866476.1|/9.63256e-133/hypothetical protein ARALYDRAFT_496395 [Arabidopsis lyrata subsp. lyrata]
gi|161540434|gb|EY912047.1|EY912047	722	4	37	1.3433	9.85373	2.87489	Up	2.26098e-06	1.22608e-05	K13420|1|3e-16|83.6|vvi:100253808|LRR receptor-like serine/threonine-protein kinase FLS2 [EC:2.7.11.1]	GO:0044464//cell part	-	GO:0006952//defense response;GO:0009743//response to carbohydrate stimulus;GO:0023052//signaling	gi|15221010|ref|NP_175225.1|/3.8576e-59/receptor like protein 7 [Arabidopsis thaliana]
CL5083.Contig2_NAU-LB	1700	92	847	13.1216	95.8011	2.86809	Up	1.4488e-118	1.15383e-116	K15639|1|7e-104|376|aly:ARALYDRAFT_901457|cytochrome P450, family 734, subfamily A, polypeptide 1 (PHYB activation tagged suppressor 1) [EC:1.14.-.-];K10717|3|5e-97|353|ath:AT5G38450|cytokinin trans-hydroxylase	GO:0044464//cell part	GO:0016491//oxidoreductase activity;GO:0005506//iron ion binding	GO:0008152//metabolic process	gi|297828425|ref|XP_002882095.1|/0/predicted protein [Arabidopsis lyrata subsp. lyrata]
gi|161517036|gb|EY896729.1|EY896729	608	5	46	1.99396	14.5476	2.86707	Up	1.21603e-07	7.69381e-07	-	-	-	-	gi|15231223|ref|NP_190159.1|/8.28066e-08/uncharacterized protein [Arabidopsis thaliana]
Unigene3037_NAU-LB	317	6	55	4.58925	33.361	2.86183	Up	6.65612e-09	4.78045e-08	K00799|1|2e-17|85.1|gmx:547936|glutathione S-transferase [EC:2.5.1.18]	GO:0009532//plastid stroma;GO:0031090//organelle membrane	GO:0042277//peptide binding;GO:0016765//transferase activity, transferring alkyl or aryl (other than methyl) groups;GO:0016209//antioxidant activity	GO:0010038//response to metal ion;GO:0009414//response to water deprivation;GO:0009755//hormone-mediated signaling pathway;GO:0009404//toxin metabolic process	gi|2204102|emb|CAA74197.1|/4.43786e-22/glutathione-S-transferase [Brassica juncea]
gi|156160974|gb|EW721120.1|EW721120	246	6	55	5.91379	42.9896	2.86183	Up	6.65612e-09	4.78107e-08	-	-	-	-	-
Unigene23411_NAU-LB	579	6	55	2.51259	18.265	2.86183	Up	6.65612e-09	4.77984e-08	-	-	-	-	gi|297807839|ref|XP_002871803.1|/1.39719e-54/hypothetical protein ARALYDRAFT_488679 [Arabidopsis lyrata subsp. lyrata]
Unigene6869_NAU-LB	347	9	82	6.28872	45.4381	2.85306	Up	1.16246e-12	1.13388e-11	-	GO:0030312//external encapsulating structure;GO:0031410//cytoplasmic vesicle	-	-	gi|297836614|ref|XP_002886189.1|/1.57247e-35/hypothetical protein ARALYDRAFT_319814 [Arabidopsis lyrata subsp. lyrata]
CL2273.Contig1_NAU-LB	803	6610	60195	1995.88	14413.9	2.85236	Up	0	0	-	-	-	-	-
CL2554.Contig2_NAU-LB	970	10	91	2.49964	18.0387	2.8513	Up	6.58648e-14	6.95943e-13	K09286|1|1e-44|178|pop:POPTR_798748|EREBP-like factor	GO:0043231//intracellular membrane-bounded organelle	GO:0003676//nucleic acid binding;GO:0001071//nucleic acid binding transcription factor activity	GO:0006351//transcription, DNA-dependent	gi|297802088|ref|XP_002868928.1|/1.09682e-111/hypothetical protein ARALYDRAFT_490762 [Arabidopsis lyrata subsp. lyrata]
gi|332770586|gb|FY430606.1|FY430606	472	4	36	2.05479	14.6655	2.83536	Up	3.68108e-06	1.94679e-05	K06995|1|3e-30|129|smo:SELMODRAFT_124412|	-	-	-	gi|15229267|ref|NP_187080.1|/7.90029e-42/cupin domain-containing protein [Arabidopsis thaliana]
gi|332778536|gb|FY442943.1|FY442943	820	4	36	1.18276	8.4416	2.83536	Up	3.68108e-06	1.94698e-05	K00799|1|5e-50|196|mtr:MTR_5g040430|glutathione S-transferase [EC:2.5.1.18]	GO:0044424//intracellular part	GO:0016829//lyase activity	GO:0009404//toxin metabolic process	gi|30697685|ref|NP_851249.1|/1.93124e-108/glutathione S-transferase tau 9 [Arabidopsis thaliana]
gi|154170975|gb|EV542249.1|EV542249	708	3	27	1.02739	7.33275	2.83536	Up	7.04788e-05	0.000308808	-	GO:0044464//cell part	GO:0015291//secondary active transmembrane transporter activity	GO:0015893//drug transport	gi|411596167|gb|AFW19998.1|/4.70492e-62/aluminum-activated citrate transporter [Brassica napus]
CL5359.Contig7_NAU-LB	1151	5	45	1.05328	7.5175	2.83536	Up	1.97663e-07	1.22101e-06	-	-	-	-	gi|18402437|ref|NP_566652.1|/9.77343e-129/uncharacterized protein [Arabidopsis thaliana]
CL8992.Contig1_NAU-LB	1406	20	179	3.44901	24.4796	2.82733	Up	6.94796e-26	1.28188e-24	-	GO:0044464//cell part	-	GO:0009725//response to hormone stimulus;GO:0006970//response to osmotic stress	gi|34100944|gb|AAQ57584.1|/1.5961e-179/BURP domain-containing protein [Brassica napus]
gi|167432967|gb|FD938109.1|FD938109	529	4	35	1.83339	12.7218	2.79472	Up	5.97896e-06	3.09147e-05	-	-	-	-	gi|297830000|ref|XP_002882882.1|/7.83837e-40/hypothetical protein ARALYDRAFT_897725 [Arabidopsis lyrata subsp. lyrata]
CL9354.Contig1_NAU-LB	637	13	113	4.94827	34.1095	2.78518	Up	1.35312e-16	1.67078e-15	-	GO:0043231//intracellular membrane-bounded organelle	GO:0003677//DNA binding;GO:0001071//nucleic acid binding transcription factor activity;GO:0005515//protein binding	GO:0006351//transcription, DNA-dependent;GO:0009411//response to UV	gi|30684595|ref|NP_850605.1|/7.28377e-37/transcription factor HY5-like protein [Arabidopsis thaliana]
gi|161562781|gb|EY934356.1|EY934356	514	3	26	1.41517	9.72627	2.78091	Up	0.00011469	0.00048175	-	GO:0043231//intracellular membrane-bounded organelle	GO:0003676//nucleic acid binding;GO:0001071//nucleic acid binding transcription factor activity;GO:0046983//protein dimerization activity	GO:0032501//multicellular organismal process;GO:0006950//response to stress;GO:0010467//gene expression;GO:0007165//signal transduction	gi|297815206|ref|XP_002875486.1|/9.11037e-27/ANAC059/ATNAC3 [Arabidopsis lyrata subsp. lyrata]
gi|158645869|gb|EX755760.1|EX755760	649	3	26	1.12079	7.70309	2.78091	Up	0.00011469	0.000481786	K14638|1|9e-32|134|mtr:MTR_4g015080|solute carrier family 15 (peptide/histidine transporter), member 3/4	GO:0016020//membrane	GO:0046872//metal ion binding	GO:0051707//response to other organism;GO:0015833//peptide transport	gi|312282907|dbj|BAJ34319.1|/4.16454e-104/unnamed protein product [Thellungiella halophila]
Unigene20482_NAU-LB	958	7	60	1.77167	12.0426	2.76497	Up	2.533e-09	1.89358e-08	K01183|1|1e-87|321|ath:AT3G12500|chitinase [EC:3.2.1.14]	GO:0030312//external encapsulating structure	GO:0004553//hydrolase activity, hydrolyzing O-glycosyl compounds	GO:0006026	gi|297809989|ref|XP_002872878.1|/7.64816e-134/hypothetical protein ARALYDRAFT_912061 [Arabidopsis lyrata subsp. lyrata]
gi|154172241|gb|EV543514.1|EV543514	770	7	60	2.20423	14.9829	2.76497	Up	2.533e-09	1.89384e-08	-	-	-	-	-
Unigene22172_NAU-LB	432	4	34	2.24505	15.1332	2.7529	Up	9.68708e-06	4.87767e-05	K10418|1|2e-13|72.8|ota:Ot01g00570|dynein light chain LC8-type	GO:0015630//microtubule cytoskeleton	GO:0003774//motor activity	GO:0009987//cellular process	gi|22328970|ref|NP_194466.2|/1.85467e-36/dynein light chain type 1-like protein [Arabidopsis thaliana]
CL7231.Contig1_NAU-LB	1442	28	238	4.70806	31.7357	2.7529	Up	4.60464e-33	1.0692e-31	K07407|1|0.0|807|aly:ARALYDRAFT_486071|alpha-galactosidase [EC:3.2.1.22]	GO:0031410//cytoplasmic vesicle;GO:0043231//intracellular membrane-bounded organelle	GO:0043167//ion binding;GO:0015925	GO:0044238//primary metabolic process	gi|297816956|ref|XP_002876361.1|/0/hypothetical protein ARALYDRAFT_486071 [Arabidopsis lyrata subsp. lyrata]
Unigene13662_NAU-LB	246	6	51	5.91379	39.8631	2.7529	Up	4.57922e-08	3.01783e-07	K08176|1|8e-07|50.1|aly:ARALYDRAFT_485875|MFS transporter, PHS family, inorganic phosphate transporter	-	-	-	-
gi|161543667|gb|EY916287.1|EY916287	599	7	59	2.83348	18.9392	2.74073	Up	4.08468e-09	2.98767e-08	-	-	-	-	gi|297800872|ref|XP_002868320.1|/1.16344e-30/hypothetical protein ARALYDRAFT_493510 [Arabidopsis lyrata subsp. lyrata]
gi|167495881|gb|FD978086.1|FD978086	590	5	42	2.05479	13.6878	2.73583	Up	8.3877e-07	4.80585e-06	-	-	-	-	gi|312282965|dbj|BAJ34348.1|/2.85565e-26/unnamed protein product [Thellungiella halophila]
gi|167438031|gb|FD947321.1|FD947321	690	3	25	1.0542	6.9667	2.72433	Up	0.000186034	0.000765295	K08912|1|1e-85|313|aly:ARALYDRAFT_482403|light-harvesting complex II chlorophyll a/b binding protein 1	GO:0031224//intrinsic to membrane;GO:0009521;GO:0009526//plastid envelope;GO:0009534//chloroplast thylakoid;GO:0009570//chloroplast stroma;GO:0005576//extracellular region	GO:0043169//cation binding;GO:0046906//tetrapyrrole binding	GO:0009746;GO:0006091//generation of precursor metabolites and energy;GO:0009639//response to red or far red light;GO:0006464//cellular protein modification process	gi|18266039|gb|AAL67432.1|AF458406_1/5.18326e-87/chlorophyll a/b binding protein [Brassica oleracea]
gi|154165664|gb|EV536938.1|EV536938	826	3	25	0.880624	5.81964	2.72433	Up	0.000186034	0.000765408	K09422|1|2e-52|135|aly:ARALYDRAFT_496112|myb proto-oncogene protein, plant	GO:0043231//intracellular membrane-bounded organelle	GO:0003676//nucleic acid binding;GO:0001071//nucleic acid binding transcription factor activity	GO:0009725//response to hormone stimulus;GO:0006351//transcription, DNA-dependent;GO:0009743//response to carbohydrate stimulus;GO:0010038//response to metal ion	gi|297746133|emb|CBI16189.3|/7.11992e-59/unnamed protein product [Vitis vinifera]
Unigene25117_NAU-LB	533	3	25	1.36472	9.0188	2.72433	Up	0.000186034	0.000765352	-	-	-	-	-
Unigene6634_NAU-LB	342	5	41	3.54481	23.0512	2.70106	Up	1.35212e-06	7.56855e-06	-	GO:0016020//membrane;GO:0043231//intracellular membrane-bounded organelle	-	GO:0007165//signal transduction	gi|297823673|ref|XP_002879719.1|/1.48549e-25/soul heme-binding family protein [Arabidopsis lyrata subsp. lyrata]
gi|167500720|gb|FD983358.1|FD983358	631	11	90	4.22681	27.4252	2.69786	Up	4.44462e-13	4.44694e-12	-	GO:0043231//intracellular membrane-bounded organelle	-	GO:0048513//organ development	gi|297849706|ref|XP_002892734.1|/4.76109e-09/hypothetical protein ARALYDRAFT_888682 [Arabidopsis lyrata subsp. lyrata]
CL3135.Contig1_NAU-LB	1178	6	49	1.23497	7.9981	2.69518	Up	1.1882e-07	7.51946e-07	K15277|1|4e-171|598|aly:ARALYDRAFT_492565|solute carrier family 35 (adenosine 3'-phospho 5'-phosphosulfate transporter), member B3	GO:0031224//intrinsic to membrane	-	GO:0006810//transport	gi|42567047|ref|NP_194032.2|/3.89214e-173/UDP-galactose transporter 2 [Arabidopsis thaliana]
Unigene12477_NAU-LB	925	22	179	5.76674	37.2089	2.68982	Up	1.21384e-24	2.12725e-23	-	-	GO:0003676//nucleic acid binding;GO:0001071//nucleic acid binding transcription factor activity	GO:0009851//auxin biosynthetic process;GO:0048511//rhythmic process;GO:0009755//hormone-mediated signaling pathway;GO:0006351//transcription, DNA-dependent	gi|42567912|ref|NP_568344.2|/1.06561e-68/myb family transcription factor [Arabidopsis thaliana]
CL4201.Contig1_NAU-LB	955	12	97	3.04668	19.5301	2.68039	Up	6.53098e-14	6.90342e-13	-	-	-	-	gi|17821|emb|CAA78762.1|/7.14199e-07/glycine-rich_protein_(aa1-291) [Brassica napus]
CL7871.Contig1_NAU-LB	1502	17	137	2.74428	17.5383	2.67601	Up	4.40638e-19	6.17149e-18	-	GO:0031224//intrinsic to membrane	GO:0004871//signal transducer activity	GO:0009267//cellular response to starvation;GO:0015698//inorganic anion transport	gi|41079243|gb|AAR99483.1|/0/PHO1-like protein [Arabidopsis thaliana]
Unigene14279_NAU-LB	384	18	145	11.3656	72.6061	2.67542	Up	4.09698e-20	6.02028e-19	K13423|1|2e-27|119|aly:ARALYDRAFT_481938|WRKY transcription factor 25;K13424|5|3e-27|117|sbi:SORBI_09g023270|WRKY transcription factor 33	-	GO:0003677//DNA binding	GO:0006351//transcription, DNA-dependent	gi|206574956|gb|ACI14391.1|/1.50498e-30/WRKY26-1 transcription factor [Brassica napus]
CL9721.Contig2_NAU-LB	957	4	32	1.01344	6.42945	2.66544	Up	2.52264e-05	0.000119315	-	GO:0030312//external encapsulating structure	GO:0004091//carboxylesterase activity;GO:0004857//enzyme inhibitor activity	-	gi|15724357|gb|AAL06571.1|AF412119_1/1.67731e-72/At1g47960/T2J15_13 [Arabidopsis thaliana]
CL2174.Contig1_NAU-LB	1079	4	32	0.898852	5.70249	2.66544	Up	2.52264e-05	0.000119305	K14297|1|4e-25|114|mtr:MTR_1g066430|nuclear pore complex protein Nup98-Nup96	-	GO:0046872//metal ion binding	-	gi|334184747|ref|NP_001189695.1|/1.054e-105/RING/U-box domain-containing protein [Arabidopsis thaliana]
Unigene19754_NAU-LB	1334	4	32	0.727032	4.61243	2.66544	Up	2.52264e-05	0.000119295	-	-	-	-	gi|297792253|ref|XP_002864011.1|/2.50835e-94/hypothetical protein ARALYDRAFT_917968 [Arabidopsis lyrata subsp. lyrata]
gi|167484196|gb|FD967528.1|FD967528	812	6	48	1.79161	11.3664	2.66544	Up	1.9084e-07	1.18175e-06	-	-	GO:0046872//metal ion binding	-	gi|145334817|ref|NP_001078754.1|/8.27395e-112/calcium-binding endonuclease/exonuclease/phosphatase family protein [Arabidopsis thaliana]
Unigene22917_NAU-LB	488	5	40	2.48427	15.7607	2.66544	Up	2.17466e-06	1.18031e-05	K12135|1|3e-49|192|aly:ARALYDRAFT_488429|zinc finger protein CONSTANS	GO:0044464//cell part	GO:0046914//transition metal ion binding	-	gi|22854928|gb|AAN09819.1|/2.32078e-71/COL1 protein [Brassica nigra]
gi|156157844|gb|EW717990.1|EW717990	655	30	240	11.1053	70.4541	2.66544	Up	2.9687e-32	6.74681e-31	K00737|1|6e-71|265|aly:ARALYDRAFT_488289|beta-1,4-mannosyl-glycoprotein beta-1,4-N-acetylglucosaminyltransferase [EC:2.4.1.144]	GO:0044464//cell part	GO:0008375//acetylglucosaminyltransferase activity	GO:0006486//protein glycosylation	gi|297807475|ref|XP_002871621.1|/6.85057e-70/glycosyl transferase family 17 protein [Arabidopsis lyrata subsp. lyrata]
gnl|UG|Rsa#S42049322	1065	64	505	14.5707	91.1754	2.64558	Up	1.15434e-65	5.1335e-64	K09872|1|1e-156|550|ath:AT2G37170|aquaporin PIP	GO:0031224//intrinsic to membrane;GO:0009536//plastid	GO:0005372//water transmembrane transporter activity;GO:0019899//enzyme binding	GO:0009414//response to water deprivation;GO:0009725//response to hormone stimulus;GO:0055085//transmembrane transport;GO:0042044//fluid transport	gi|7209562|dbj|BAA92261.1|/3.50301e-162/Plasma membrane aquaporin 2c [Raphanus sativus]
CL8462.Contig2_NAU-LB	226	3329	26197	3571.53	22288.4	2.64168	Up	0	0	-	-	-	-	-
CL4231.Contig1_NAU-LB	1776	172	1343	23.482	145.402	2.63042	Up	9.71414e-171	1.09312e-168	K00511|1|0.0|740|aly:ARALYDRAFT_662237|squalene monooxygenase [EC:1.14.13.132]	GO:0031224//intrinsic to membrane	GO:0004497//monooxygenase activity;GO:0050662//coenzyme binding	GO:0006694//steroid biosynthetic process	gi|6685411|sp|O65727.1|ERG11_BRANA/0/RecName: Full=Squalene monooxygenase 1,1; AltName: Full=Squalene epoxidase 1,1; Short=SE 1,1
CL4666.Contig5_NAU-LB	2534	33634	262022	3218.26	19882.3	2.62713	Up	0	0	-	-	-	-	-
gi|154097989|gb|EV530962.1|EV530962	794	8	62	2.44297	15.0144	2.61963	Up	3.89156e-09	2.8577e-08	K06118|1|4e-106|382|aly:ARALYDRAFT_491388|UDP-sulfoquinovose synthase [EC:3.13.1.1]	GO:0009536//plastid	GO:0046914//transition metal ion binding;GO:0046508;GO:0048037//cofactor binding	GO:0008610//lipid biosynthetic process;GO:0006664//glycolipid metabolic process;GO:0009267//cellular response to starvation	gi|297802690|ref|XP_002869229.1|/5.52696e-105/hypothetical protein ARALYDRAFT_491388 [Arabidopsis lyrata subsp. lyrata]
Unigene25544_NAU-LB	236	4	31	4.10958	25.2572	2.61963	Up	4.05346e-05	0.000186129	-	-	-	-	-
CL3398.Contig1_NAU-LB	1986	93323	723186	11393.5	70017.5	2.6195	Up	0	0	-	-	-	-	-
CL10002.Contig1_NAU-LB	1560	11	85	1.70969	10.4768	2.6154	Up	4.64434e-12	4.3493e-11	K03115|1|3e-92|337|vvi:100262569|casein kinase II subunit beta;K00889|2|7e-34|143|osa:4344166|1-phosphatidylinositol-4-phosphate 5-kinase [EC:2.7.1.68]	-	-	-	gi|297850616|ref|XP_002893189.1|/1.4061e-163/hypothetical protein ARALYDRAFT_472428 [Arabidopsis lyrata subsp. lyrata]
CL5601.Contig2_NAU-LB	931	78	591	20.3139	122.06	2.58705	Up	9.4335e-75	4.74999e-73	K03686|1|2e-09|61.6|ppp:PHYPADRAFT_108109|molecular chaperone DnaJ;K09517|2|5e-09|60.1|pop:POPTR_572634|DnaJ homolog subfamily B member 11	GO:0043231//intracellular membrane-bounded organelle	GO:0005515//protein binding	GO:0050896//response to stimulus	gi|297798310|ref|XP_002867039.1|/9.19014e-60/DNAJ heat shock N-terminal domain-containing protein [Arabidopsis lyrata subsp. lyrata]
Unigene12567_NAU-LB	1749	32	240	4.43618	26.385	2.57233	Up	4.4008e-31	9.63893e-30	K13424|1|7e-22|103|sbi:SORBI_09g023270|WRKY transcription factor 33	-	-	GO:0006351//transcription, DNA-dependent	gi|20978798|sp|Q9ZSI7.2|WRK47_ARATH/3.36742e-169/RecName: Full=Probable WRKY transcription factor 47; AltName: Full=WRKY DNA-binding protein 47
Unigene11282_NAU-LB	389	4	30	2.49322	14.8289	2.57233	Up	6.49328e-05	0.000285996	-	GO:0031224//intrinsic to membrane	GO:0015299//solute:hydrogen antiporter activity	GO:0006811//ion transport;GO:0006875//cellular metal ion homeostasis	gi|297820108|ref|XP_002877937.1|/2.29737e-55/cation/H+ exchanger [Arabidopsis lyrata subsp. lyrata]
Unigene19851_NAU-LB	1062	22	165	5.02282	29.8741	2.57233	Up	8.21574e-22	1.30227e-20	K12135|1|3e-06|51.2|aly:ARALYDRAFT_488429|zinc finger protein CONSTANS	-	GO:0046914//transition metal ion binding	GO:0009743//response to carbohydrate stimulus	gi|15232482|ref|NP_188752.1|/9.41765e-59/B-box 32 protein [Arabidopsis thaliana]
gi|166138605|gb|FD572291.1|FD572291	411	28	210	16.5183	98.2457	2.57233	Up	2.23116e-27	4.33513e-26	-	-	-	-	-
gi|166116067|gb|FD546992.1|FD546992	630	6	45	2.30919	13.7343	2.57233	Up	7.80794e-07	4.51697e-06	-	-	-	-	gi|297817034|ref|XP_002876400.1|/8.65664e-19/hypothetical protein ARALYDRAFT_907174 [Arabidopsis lyrata subsp. lyrata]
gi|158654619|gb|EX764510.1|EX764510	541	6	45	2.68908	15.9938	2.57233	Up	7.80794e-07	4.51744e-06	K08336|1|1e-44|176|ath:AT1G54210|autophagy-related protein 12	GO:0044424//intracellular part	-	GO:0016567//protein ubiquitination;GO:0006810//transport;GO:0044248//cellular catabolic process;GO:0007033//vacuole organization	gi|15221755|ref|NP_175823.1|/1.59621e-43/ubiquitin-like protein ATG12A [Arabidopsis thaliana]
CL786.Contig3_NAU-LB	1187	8	60	1.63414	9.71934	2.57233	Up	9.88888e-09	6.98048e-08	-	-	-	-	gi|297804388|ref|XP_002870078.1|/6.18641e-110/zinc-binding family protein [Arabidopsis lyrata subsp. lyrata]
CL4443.Contig1_NAU-LB	1495	36	269	5.83863	34.5977	2.56697	Up	1.38549e-34	3.34425e-33	K00327|1|0.0|673|ath:AT4G30210|NADPH-ferrihemoprotein reductase [EC:1.6.2.4]	GO:0031090//organelle membrane;GO:0009536//plastid	GO:0046914//transition metal ion binding;GO:0016653//oxidoreductase activity, acting on NAD(P)H, heme protein as acceptor;GO:0000166//nucleotide binding	GO:0006725//cellular aromatic compound metabolic process	gi|15234668|ref|NP_194750.1|/0/NADPH-ferrihemoprotein reductase [Arabidopsis thaliana]
Unigene15396_NAU-LB	742	5	37	1.63386	9.58813	2.55296	Up	8.91392e-06	4.51989e-05	K14493|1|1e-86|317|aly:ARALYDRAFT_486805|gibberellin receptor GID1 [EC:3.-.-.-]	-	GO:0005488//binding;GO:0003824//catalytic activity	GO:0009312//oligosaccharide biosynthetic process;GO:0003006//developmental process involved in reproduction;GO:0009740//gibberellic acid mediated signaling pathway	gi|315075933|gb|ADT78692.1|/3.16825e-88/gibberellin receptor 1B [Brassica napus]
CL7101.Contig3_NAU-LB	2557	69433	510630	6583.92	38398.3	2.54402	Up	0	0	K14442|1|1e-06|53.9|mtr:MTR_1g056490|ATP-dependent RNA helicase DHX36 [EC:3.6.4.13]	-	-	-	gi|218185637|gb|EEC68064.1|/1.3114e-10/hypothetical protein OsI_35917 [Oryza sativa Indica Group]
CL8462.Contig1_NAU-LB	227	1302	9557	1390.7	8095.28	2.54127	Up	0	0	-	-	-	-	-
gnl|UG|Rsa#S41979049	742	9	66	2.94095	17.1032	2.53991	Up	2.25444e-09	1.69057e-08	-	GO:0044464//cell part	-	-	gi|297853010|ref|XP_002894386.1|/3.0973e-51/hypothetical protein ARALYDRAFT_337410 [Arabidopsis lyrata subsp. lyrata]
gi|161543226|gb|EY915006.1|EY915006	288	9	66	7.57704	44.0644	2.53991	Up	2.25444e-09	1.6908e-08	K13067|1|3e-35|144|ath:AT1G67990|putative caffeoyl-CoA 3-O-methyltransferase [EC:2.1.1.-];K00588|2|6e-34|140|ath:AT1G24735|caffeoyl-CoA O-methyltransferase [EC:2.1.1.104]	GO:0044444//cytoplasmic part	GO:0043169//cation binding;GO:0008171//O-methyltransferase activity	GO:0006596//polyamine biosynthetic process;GO:0009699//phenylpropanoid biosynthetic process;GO:0006730//one-carbon metabolic process;GO:0009791//post-embryonic development	gi|297841531|ref|XP_002888647.1|/3.04043e-39/hypothetical protein ARALYDRAFT_475925 [Arabidopsis lyrata subsp. lyrata]
gnl|UG|Rsa#S42573642	737	45	330	14.8045	86.0959	2.53991	Up	1.305e-41	3.74903e-40	K06689|1|3e-78|289|aly:ARALYDRAFT_480557|ubiquitin-conjugating enzyme E2 D/E [EC:6.3.2.19]	GO:0043231//intracellular membrane-bounded organelle	GO:0019899//enzyme binding;GO:0019787//small conjugating protein ligase activity;GO:0032559	GO:0019941//modification-dependent protein catabolic process;GO:0032446//protein modification by small protein conjugation	gi|297832262|ref|XP_002884013.1|/3.27309e-77/ubiquitin-conjugating enzyme 27 [Arabidopsis lyrata subsp. lyrata]
gi|332795153|gb|FY453217.1|FY453217	898	13	95	3.51008	20.3415	2.53485	Up	6.28992e-13	6.23596e-12	K00457|1|1e-130|464|aly:ARALYDRAFT_887861|4-hydroxyphenylpyruvate dioxygenase [EC:1.13.11.27]	GO:0009536//plastid	GO:0016702//oxidoreductase activity, acting on single donors with incorporation of molecular oxygen, incorporation of two atoms of oxygen;GO:0005515//protein binding	GO:0045426//quinone cofactor biosynthetic process;GO:0042360//vitamin E metabolic process;GO:0006520//cellular amino acid metabolic process;GO:0016109	gi|377657549|gb|AFB74208.1|/1.7616e-137/4-hydroxyphenylpyruvate dioxygenase [Brassica napus]
CL6490.Contig1_NAU-LB	577	15	109	6.30326	36.3234	2.52673	Up	1.34654e-14	1.4761e-13	K06689|1|5e-38|155|ath:AT2G16740|ubiquitin-conjugating enzyme E2 D/E [EC:6.3.2.19]	-	GO:0019787//small conjugating protein ligase activity;GO:0032559	GO:0019941//modification-dependent protein catabolic process;GO:0032446//protein modification by small protein conjugation	gi|18398199|ref|NP_565391.1|/5.81878e-37/ubiquitin-conjugating enzyme E2 29 [Arabidopsis thaliana]
gi|166142561|gb|FD574597.1|FD574597	489	4	29	1.98336	11.4032	2.52342	Up	0.00010368	0.000443958	-	-	GO:0046914//transition metal ion binding	-	gi|297823503|ref|XP_002879634.1|/3.63904e-16/hypothetical protein ARALYDRAFT_482676 [Arabidopsis lyrata subsp. lyrata]
gi|154097932|gb|EV530905.1|EV530905	783	9	65	2.78696	15.962	2.51788	Up	3.57366e-09	2.63715e-08	K15397|1|1e-99|360|ath:AT1G68530|3-ketoacyl-CoA synthase [EC:2.3.1.-]	GO:0043231//intracellular membrane-bounded organelle	GO:0004312//fatty acid synthase activity	GO:0009314//response to radiation;GO:0006633//fatty acid biosynthetic process;GO:0000902//cell morphogenesis;GO:0007275//multicellular organismal development;GO:0003006//developmental process involved in reproduction;GO:0006950//response to stress	gi|15221431|ref|NP_177020.1|/1.68571e-98/3-ketoacyl-CoA synthase 6 [Arabidopsis thaliana]
gi|158661024|gb|EX770915.1|EX770915	779	5	36	1.55626	8.88589	2.51343	Up	1.41899e-05	6.95715e-05	K04733|1|6e-50|123|smo:SELMODRAFT_230241|interleukin-1 receptor-associated kinase 4 [EC:2.7.11.1]	GO:0016020//membrane	GO:0004672//protein kinase activity;GO:0032559	GO:0006468//protein phosphorylation	gi|7267848|emb|CAB78191.1|/8.73149e-99/serine/threonine kinase-like protein [Arabidopsis thaliana]
Unigene215_NAU-LB	589	5	36	2.05828	11.7523	2.51343	Up	1.41899e-05	6.95776e-05	-	-	-	-	gi|334185979|ref|NP_001190089.1|/5.94059e-32/uncharacterized protein [Arabidopsis thaliana]
CL4666.Contig3_NAU-LB	2471	12509	89411	1227.44	6957.52	2.50292	Up	0	0	-	-	-	-	-
gi|156154552|gb|EW714698.1|EW714698	637	7	50	2.66445	15.0927	2.50194	Up	2.78136e-07	1.69124e-06	-	GO:0043231//intracellular membrane-bounded organelle	-	GO:0048513//organ development	gi|297849706|ref|XP_002892734.1|/3.51759e-15/hypothetical protein ARALYDRAFT_888682 [Arabidopsis lyrata subsp. lyrata]
Unigene20873_NAU-LB	1219	19	135	3.7792	21.2944	2.49433	Up	1.56951e-17	2.04279e-16	-	-	GO:0004672//protein kinase activity	-	gi|15240580|ref|NP_199803.1|/9.03799e-80/octicosapeptide/Phox/Bem1p domain-containing protein [Arabidopsis thaliana]
CL3289.Contig1_NAU-LB	1039	118	838	27.537	155.083	2.4936	Up	4.23532e-101	2.88173e-99	K12135|1|6e-14|76.6|aly:ARALYDRAFT_488429|zinc finger protein CONSTANS	GO:0043231//intracellular membrane-bounded organelle	GO:0003676//nucleic acid binding;GO:0046914//transition metal ion binding;GO:0001071//nucleic acid binding transcription factor activity;GO:0005515//protein binding	GO:0006970//response to osmotic stress;GO:0006351//transcription, DNA-dependent;GO:0009639//response to red or far red light	gi|312282363|dbj|BAJ34047.1|/4.78126e-116/unnamed protein product [Thellungiella halophila]
CL7101.Contig2_NAU-LB	1414	9077	64091	1556.48	8715.33	2.48527	Up	0	0	K12818|1|4e-07|54.7|osa:4340964|ATP-dependent RNA helicase DHX8/PRP22 [EC:3.6.4.13];K14442|2|5e-06|50.8|mtr:MTR_1g056490|ATP-dependent RNA helicase DHX36 [EC:3.6.4.13]	-	-	-	gi|218185637|gb|EEC68064.1|/4.90439e-11/hypothetical protein OsI_35917 [Oryza sativa Indica Group]
CL4406.Contig1_NAU-LB	827	12	84	3.51824	19.5303	2.47279	Up	2.69084e-11	2.37167e-10	K13993|1|4e-73|272|aly:ARALYDRAFT_474482|HSP20 family protein	-	-	GO:0000302//response to reactive oxygen species;GO:0009408//response to heat;GO:0009642//response to light intensity	gi|211926828|dbj|BAG82627.1|/1.97523e-76/heat shock protein [Brassica rapa subsp. chinensis]
CL2444.Contig2_NAU-LB	490	4	28	1.97931	10.9875	2.47279	Up	0.000164981	0.000683697	-	-	-	-	-
CL5973.Contig1_NAU-LB	589	4	28	1.64662	9.14069	2.47279	Up	0.000164981	0.000683748	-	-	-	-	gi|297806523|ref|XP_002871145.1|/9.12261e-49/hypothetical protein ARALYDRAFT_908428 [Arabidopsis lyrata subsp. lyrata]
CL8319.Contig1_NAU-LB	850	14	97	3.99354	21.9426	2.458	Up	8.99056e-13	8.81906e-12	K00924|1|5e-11|66.6|aly:ARALYDRAFT_489138|[EC:2.7.1.-]	GO:0005576//extracellular region	GO:0008233//peptidase activity	GO:0019538//protein metabolic process	gi|297811185|ref|XP_002873476.1|/6.23129e-89/hypothetical protein ARALYDRAFT_325615 [Arabidopsis lyrata subsp. lyrata]
gnl|UG|Rsa#S42043129	848	11	76	3.14519	17.2327	2.45393	Up	2.92348e-10	2.35937e-09	-	-	-	-	gi|297845676|ref|XP_002890719.1|/4.95221e-54/hypothetical protein ARALYDRAFT_472926 [Arabidopsis lyrata subsp. lyrata]
gi|166142290|gb|FD574221.1|FD574221	454	6	41	3.20439	17.3646	2.43803	Up	4.94562e-06	2.57201e-05	-	-	-	-	gi|297816960|ref|XP_002876363.1|/1.33497e-29/hypothetical protein ARALYDRAFT_907078 [Arabidopsis lyrata subsp. lyrata]
Unigene2695_NAU-LB	496	9	61	4.39957	23.6474	2.42625	Up	2.21722e-08	1.51696e-07	-	-	-	-	-
gi|332783129|gb|FY440437.1|FY440437	887	6	40	1.64013	8.67107	2.4024	Up	7.79534e-06	3.96283e-05	K01190|1|1e-48|174|ota:Ot07g03490|beta-galactosidase [EC:3.2.1.23]	GO:0016020//membrane	GO:0016701//oxidoreductase activity, acting on single donors with incorporation of molecular oxygen	-	gi|297814384|ref|XP_002875075.1|/6.58092e-119/hypothetical protein ARALYDRAFT_484067 [Arabidopsis lyrata subsp. lyrata]
gnl|UG|Rsa#S42027505	835	6	40	1.74226	9.21106	2.4024	Up	7.79534e-06	3.96319e-05	-	-	-	-	gi|30691679|ref|NP_195519.3|/4.52902e-44/uncharacterized protein [Arabidopsis thaliana]
CL3077.Contig1_NAU-LB	1209	20	133	4.011	21.1525	2.39879	Up	1.34071e-16	1.65583e-15	-	GO:0043231//intracellular membrane-bounded organelle	GO:0003676//nucleic acid binding;GO:0001071//nucleic acid binding transcription factor activity;GO:0046983//protein dimerization activity	GO:0009725//response to hormone stimulus;GO:0032501//multicellular organismal process;GO:0006950//response to stress;GO:0010467//gene expression;GO:0007165//signal transduction	gi|297853056|ref|XP_002894409.1|/1.30838e-147/ANAC019 [Arabidopsis lyrata subsp. lyrata]
CL434.Contig2_NAU-LB	1440	24	159	4.04109	21.231	2.39336	Up	1.56756e-19	2.24585e-18	K13811|1|0.0|799|aly:ARALYDRAFT_494627|3'-phosphoadenosine 5'-phosphosulfate synthase [EC:2.7.7.4 2.7.1.25]	GO:0016020//membrane;GO:0009536//plastid	GO:0004779//sulfate adenylyltransferase activity	GO:0006790//sulfur compound metabolic process;GO:0010038//response to metal ion	gi|256600184|gb|ACV04806.1|/0/ATP sulfurylase 4 [Brassica napus]
gi|161566903|gb|EY938033.1|EY938033	658	8	53	2.94791	15.4877	2.39336	Up	2.43888e-07	1.49016e-06	-	-	-	-	gi|297853010|ref|XP_002894386.1|/2.17639e-31/hypothetical protein ARALYDRAFT_337410 [Arabidopsis lyrata subsp. lyrata]
gi|166124263|gb|FD559011.1|FD559011	716	5	33	1.69319	8.86211	2.3879	Up	5.62284e-05	0.000250034	-	GO:0044464//cell part	-	-	gi|341958528|sp|E4MWF4.1|CSPL1_THEHA/2.43291e-24/RecName: Full=CASP-like protein 1
gi|167438704|gb|FD946038.1|FD946038	692	5	33	1.75192	9.16946	2.3879	Up	5.62284e-05	0.000250014	-	-	-	-	gi|6714272|gb|AAF25968.1|AC017118_5/4.88496e-93/F6N18.8 [Arabidopsis thaliana]
Unigene26776_NAU-LB	494	5	33	2.4541	12.8447	2.3879	Up	5.62284e-05	0.000249994	-	GO:0016020//membrane;GO:0009536//plastid	GO:0004672//protein kinase activity;GO:0032559	GO:0009725//response to hormone stimulus;GO:0006952//defense response;GO:0006464//cellular protein modification process;GO:0008219//cell death	gi|297799688|ref|XP_002867728.1|/2.0117e-17/predicted protein [Arabidopsis lyrata subsp. lyrata]
CL4666.Contig1_NAU-LB	376	1028	6777	662.91	3465.66	2.38624	Up	0	0	-	-	-	-	-
gi|167474428|gb|FD958930.1|FD958930	670	12	79	4.34266	22.6719	2.38426	Up	2.57038e-10	2.08713e-09	K03686|1|1e-11|67.8|aly:ARALYDRAFT_490783|molecular chaperone DnaJ	GO:0043231//intracellular membrane-bounded organelle	GO:0005515//protein binding	GO:0044267//cellular protein metabolic process;GO:0050896//response to stimulus	gi|6691127|gb|AAF24498.1|AF214107_1/5.30013e-57/DnaJ-like protein [Arabidopsis thaliana]
Unigene10343_NAU-LB	729	7	46	2.3282	12.133	2.38164	Up	1.72037e-06	9.51201e-06	-	GO:0009536//plastid	GO:0046914//transition metal ion binding	GO:0000741//karyogamy	gi|297821118|ref|XP_002878442.1|/6.05915e-84/hypothetical protein ARALYDRAFT_486728 [Arabidopsis lyrata subsp. lyrata]
CL8432.Contig1_NAU-LB	428	7	46	3.96555	20.6657	2.38164	Up	1.72037e-06	9.51296e-06	K01188|1|2e-12|69.3|osa:4338560|beta-glucosidase [EC:3.2.1.21];K05350|3|4e-09|58.2|sbi:SORBI_06g022410|beta-glucosidase [EC:3.2.1.21];K01229|5|6e-09|57.8|vvi:100267558|lactase-phlorizin hydrolase [EC:3.2.1.108 3.2.1.62]	GO:0043231//intracellular membrane-bounded organelle	GO:0016798//hydrolase activity, acting on glycosyl bonds	GO:0009628//response to abiotic stimulus	gi|22328869|ref|NP_193941.2|/1.75064e-18/beta-glucosidase 3 [Arabidopsis thaliana]
Unigene18924_NAU-LB	626	80146	524343	31042.5	161056	2.37525	Up	0	0	-	-	-	-	gi|218157747|gb|ACK58632.1|/5.1455e-48/coat protein [Carica papaya]
gi|158665652|gb|EX775543.1|EX775543	754	37	241	11.8982	61.4585	2.36887	Up	1.51152e-28	3.03007e-27	K01114|1|3e-70|263|ath:AT1G07230|phospholipase C [EC:3.1.4.3]	-	GO:0016787//hydrolase activity	-	gi|8954023|gb|AAF82197.1|AC067971_5/3.39927e-69/Contains similarity to an unknown protein T8P19.120 gi|6523092 from Arabidopsis thaliana BAC T8P19 gb|AL133315. ESTs gb|R84021, gb|AI992399, gb|H76814, gb|F15169, gb|AA585873, and gb|AA605516 come from this gene [Arabidopsis thaliana]
Unigene19053_NAU-LB	1776	70	455	9.55662	49.2611	2.36588	Up	1.81989e-52	6.49747e-51	K13415|1|1e-28|95.5|rcu:RCOM_0478150|protein brassinosteroid insensitive 1 [EC:2.7.10.1 2.7.11.1];K00924|3|3e-27|87.0|ath:AT1G75820|[EC:2.7.1.-]	-	GO:0016772//transferase activity, transferring phosphorus-containing groups	GO:0023052//signaling	gi|15225775|ref|NP_180861.1|/7.0222e-174/receptor like protein 24 [Arabidopsis thaliana]
CL1370.Contig2_NAU-LB	1525	143361	924770	22793.5	116600	2.35488	Up	0	0	-	-	-	-	gi|53748481|emb|CAH59423.1|/5.28844e-91/hypothetical protein [Plantago major]
gnl|UG|Rsa#S42021191	817	14	90	4.15485	21.1815	2.34994	Up	2.07836e-11	1.85032e-10	K09338|1|2e-97|353|aly:ARALYDRAFT_486694|homeobox-leucine zipper protein	GO:0043231//intracellular membrane-bounded organelle	GO:0001071//nucleic acid binding transcription factor activity;GO:0003677//DNA binding	GO:0006355//regulation of transcription, DNA-dependent;GO:0006970//response to osmotic stress;GO:0009755//hormone-mediated signaling pathway	gi|297821072|ref|XP_002878419.1|/2.85399e-96/ATHB-12 [Arabidopsis lyrata subsp. lyrata]
Unigene16184_NAU-LB	1209	123	790	24.6677	125.643	2.34863	Up	4.03466e-89	2.40647e-87	K06127|1|2e-07|55.1|ota:Ot01g04180|ubiquinone biosynthesis methyltransferase [EC:2.1.1.201];K00559|3|7e-07|53.5|osa:9269350|sterol 24-C-methyltransferase [EC:2.1.1.41];K08242|4|2e-06|52.0|zma:100282753|24-methylenesterol C-methyltransferase [EC:2.1.1.143]	GO:0009536//plastid	GO:0016741	-	gi|18409299|ref|NP_564969.1|/5.57403e-98/S-adenosylmethionine-dependent methyltransferase domain-containing protein [Arabidopsis thaliana]
Unigene22554_NAU-LB	1049	36	231	8.32102	42.3421	2.34726	Up	3.80742e-27	7.34643e-26	-	GO:0042995//cell projection;GO:0031224//intrinsic to membrane;GO:0031410//cytoplasmic vesicle	-	-	gi|79487647|ref|NP_194557.2|/5.63891e-40/LORELEI-like-GPI anchored protein 3 [Arabidopsis thaliana]
gi|332791068|gb|FY449501.1|FY449501	814	6	38	1.78721	8.97626	2.3284	Up	1.92023e-05	9.29662e-05	K12134|1|7e-28|122|aly:ARALYDRAFT_904154|circadian clock associated 1;K12133|3|2e-26|117|ath:AT1G01060|LATE ELONGATED HYPOCOTYL	-	GO:0003676//nucleic acid binding;GO:0001071//nucleic acid binding transcription factor activity	GO:0009851//auxin biosynthetic process;GO:0048511//rhythmic process;GO:0009755//hormone-mediated signaling pathway;GO:0006351//transcription, DNA-dependent	gi|312282659|dbj|BAJ34195.1|/1.53096e-57/unnamed protein product [Thellungiella halophila]
gi|154097738|gb|EV530711.1|EV530711	861	7	44	1.97126	9.8262	2.31751	Up	4.21604e-06	2.22168e-05	K00924|1|2e-26|117|osa:4342410|[EC:2.7.1.-]	GO:0016020//membrane	GO:0004672//protein kinase activity;GO:0032559	GO:0009725//response to hormone stimulus;GO:0006464//cellular protein modification process;GO:0006970//response to osmotic stress;GO:0023052//signaling	gi|18401539|ref|NP_566580.1|/1.65074e-87/CBL-interacting serine/threonine-protein kinase 1 [Arabidopsis thaliana]
gi|166123322|gb|FD555805.1|FD555805	835	46	288	13.3574	66.3196	2.3118	Up	6.56972e-33	1.51978e-31	K07304|1|5e-79|292|gmx:100804748|peptide-methionine (S)-S-oxide reductase [EC:1.8.4.11]	GO:0044444//cytoplasmic part	GO:0016671//oxidoreductase activity, acting on a sulfur group of donors, disulfide as acceptor	GO:0006979//response to oxidative stress;GO:0009628//response to abiotic stimulus;GO:0043412//macromolecule modification	gi|38196009|gb|AAR13689.1|/1.17265e-100/peptide methionine sulfoxide reductase [Brassica oleracea]
Unigene11728_NAU-LB	816	180	1121	53.485	264.151	2.30416	Up	6.15252e-123	5.05188e-121	-	-	-	GO:0006950//response to stress;GO:0045333//cellular respiration	gi|297833778|ref|XP_002884771.1|/5.27407e-50/hypothetical protein ARALYDRAFT_897178 [Arabidopsis lyrata subsp. lyrata]
CL9979.Contig2_NAU-LB	1086	19	118	4.24202	20.8924	2.30015	Up	3.1361e-14	3.37135e-13	-	-	-	GO:0009628//response to abiotic stimulus	gi|312281469|dbj|BAJ33600.1|/2.00403e-120/unnamed protein product [Thellungiella halophila]
Unigene19494_NAU-LB	1480	146	905	23.9189	117.577	2.29739	Up	3.02184e-99	2.02387e-97	K00640|1|1e-176|617|aly:ARALYDRAFT_897528|serine O-acetyltransferase [EC:2.3.1.30]	GO:0009536//plastid	GO:0016412//serine O-acyltransferase activity;GO:0046914//transition metal ion binding	GO:0000097//sulfur amino acid biosynthetic process;GO:0009267//cellular response to starvation;GO:0006563//L-serine metabolic process	gi|47779324|gb|AAT38561.1|/1.5349e-180/mitochondrial serine acetyltransferase [Thlaspi goesingense]
Unigene20799_NAU-LB	897	102	630	27.5713	135.047	2.29222	Up	2.00588e-69	9.43358e-68	K00737|1|1e-118|424|aly:ARALYDRAFT_488289|beta-1,4-mannosyl-glycoprotein beta-1,4-N-acetylglucosaminyltransferase [EC:2.4.1.144]	GO:0044464//cell part	GO:0008375//acetylglucosaminyltransferase activity	GO:0006486//protein glycosylation	gi|297807475|ref|XP_002871621.1|/1.54155e-117/glycosyl transferase family 17 protein [Arabidopsis lyrata subsp. lyrata]
Unigene22444_NAU-LB	225	7	43	7.54336	36.747	2.28435	Up	6.57354e-06	3.38067e-05	-	-	-	-	-
Unigene22957_NAU-LB	458	8	49	4.2352	20.5715	2.28015	Up	1.45275e-06	8.08947e-06	K13811|1|1e-49|192|ath:AT3G22890|3'-phosphoadenosine 5'-phosphosulfate synthase [EC:2.7.7.4 2.7.1.25]	GO:0016020//membrane;GO:0009536//plastid	GO:0004779//sulfate adenylyltransferase activity	GO:0006790//sulfur compound metabolic process;GO:0010038//response to metal ion	gi|4033365|emb|CAA11417.1|/1.70818e-51/ATP sulfurylase [Brassica juncea]
Unigene6143_NAU-LB	943	17	104	4.37106	21.206	2.27841	Up	1.43612e-12	1.39299e-11	-	-	-	-	gi|15241665|ref|NP_195822.1|/1.1868e-38/uncharacterized protein [Arabidopsis thaliana]
gi|158638655|gb|EX748546.1|EX748546	674	10	61	3.59741	17.4023	2.27425	Up	7.23004e-08	4.69029e-07	K05283|1|7e-08|55.5|aly:ARALYDRAFT_354960|phosphatidylinositol glycan, class W [EC:2.3.-.-];K15692|2|1e-07|54.7|smo:SELMODRAFT_66937|E3 ubiquitin-protein ligase RNF13 [EC:6.3.2.19];K10601|4|6e-07|52.4|zma:100217233|E3 ubiquitin-protein ligase synoviolin [EC:6.3.2.19]	GO:0044464//cell part	GO:0046914//transition metal ion binding	GO:0009725//response to hormone stimulus;GO:0009743//response to carbohydrate stimulus	gi|15233117|ref|NP_191705.1|/4.70136e-77/brassinosteroid-responsive RING-H2 [Arabidopsis thaliana]
Unigene27463_NAU-LB	528	11	67	5.05136	24.3993	2.2721	Up	1.62441e-08	1.12229e-07	K05387|1|7e-49|191|ath:AT2G29110|glutamate receptor, ionotropic, other eukaryote	GO:0043231//intracellular membrane-bounded organelle	GO:0005488//binding;GO:0005215//transporter activity	-	gi|158578538|gb|ABW74563.1|/3.75047e-50/glutamate receptor 2 [Boechera divaricarpa]
Unigene13637_NAU-LB	666	11	67	4.00468	19.3436	2.2721	Up	1.62441e-08	1.12243e-07	-	-	-	-	-
Unigene14222_NAU-LB	989	13	79	3.18711	15.3591	2.26878	Up	8.28626e-10	6.43601e-09	-	GO:0043231//intracellular membrane-bounded organelle	GO:0008135//translation factor activity, nucleic acid binding	GO:0006412//translation	gi|312282757|dbj|BAJ34244.1|/9.63332e-87/unnamed protein product [Thellungiella halophila]
CL1972.Contig4_NAU-LB	2610	98	593	9.10406	43.6868	2.26262	Up	1.87234e-64	8.1825e-63	-	GO:0043231//intracellular membrane-bounded organelle	GO:0016655//oxidoreductase activity, acting on NAD(P)H, quinone or similar compound as acceptor	-	gi|18419647|ref|NP_567988.1|/6.23254e-125/NAD(P)H dehydrogenase (quinone)s [Arabidopsis thaliana]
CL9766.Contig3_NAU-LB	1487	113	673	18.4254	87.0242	2.23972	Up	4.74114e-72	2.29778e-70	-	GO:0044464//cell part	-	-	gi|297851330|ref|XP_002893546.1|/0/hypothetical protein ARALYDRAFT_473111 [Arabidopsis lyrata subsp. lyrata]
gi|167483975|gb|FD968297.1|FD968297	611	14	83	5.55567	26.12	2.23312	Up	4.48704e-10	3.56787e-09	K14209|1|8e-06|48.5|ppp:PHYPADRAFT_115714|solute carrier family 36 (proton-coupled amino acid transporter)	GO:0031224//intrinsic to membrane	GO:0015175//neutral amino acid transmembrane transporter activity	GO:0003333//amino acid transmembrane transport;GO:0015804//neutral amino acid transport	gi|297823895|ref|XP_002879830.1|/1.39671e-87/hypothetical protein ARALYDRAFT_483024 [Arabidopsis lyrata subsp. lyrata]
CL8.Contig2_NAU-LB	693	8	47	2.79902	13.0407	2.22003	Up	3.49352e-06	1.86141e-05	K04733|1|3e-19|93.2|smo:SELMODRAFT_33807|interleukin-1 receptor-associated kinase 4 [EC:2.7.11.1];K13429|2|1e-18|91.7|vvi:100255092|chitin elicitor receptor kinase 1;K13418|4|1e-18|91.3|vvi:100247683|somatic embryogenesis receptor kinase 1 [EC:2.7.10.1 2.7.11.1]	GO:0043231//intracellular membrane-bounded organelle;GO:0016020//membrane	GO:0004672//protein kinase activity;GO:0032559	GO:0009725//response to hormone stimulus;GO:0006468//protein phosphorylation	gi|4008012|gb|AAC95354.1|/1.33649e-74/receptor-like protein kinase [Arabidopsis thaliana]
gi|154257039|gb|EV568086.1|EV568086	790	7	41	2.14843	9.97913	2.21563	Up	1.58439e-05	7.72722e-05	K09510|1|3e-16|83.6|cre:CHLREDRAFT_298|DnaJ homolog subfamily B member 4;K09517|4|7e-14|75.9|gmx:100799151|DnaJ homolog subfamily B member 11	-	GO:0005515//protein binding	GO:0044267//cellular protein metabolic process;GO:0050896//response to stimulus	gi|297828754|ref|XP_002882259.1|/8.01714e-64/predicted protein [Arabidopsis lyrata subsp. lyrata]
Unigene21895_NAU-LB	1228	35	205	6.91065	32.099	2.21563	Up	9.8595e-23	1.61532e-21	K01051|1|5e-100|362|vvi:100255703|pectinesterase [EC:3.1.1.11]	GO:0005618//cell wall;GO:0043231//intracellular membrane-bounded organelle	GO:0030234//enzyme regulator activity;GO:0004091//carboxylesterase activity	GO:0071555//cell wall organization	gi|15231618|ref|NP_191460.1|/1.56831e-172/pectinesterase 35 [Arabidopsis thaliana]
gnl|UG|Rsa#S43008252	788	6	35	1.84618	8.54039	2.20976	Up	7.2526e-05	0.000317653	K15398|1|4e-38|136|ppp:PHYPADRAFT_151187|cytochrome P450, family 86, subfamily A, polypeptide 2/4/7/8 (fatty acid omega-hydroxylase) [EC:1.14.-.-];K15402|3|3e-36|130|ppp:PHYPADRAFT_180507|cytochrome P450, family 86, subfamily B, polypeptide 1 (fatty acid omega-hydroxylase) [EC:1.14.-.-]	GO:0043231//intracellular membrane-bounded organelle	GO:0016712//oxidoreductase activity, acting on paired donors, with incorporation or reduction of molecular oxygen, reduced flavin or flavoprotein as one donor, and incorporation of one atom of oxygen;GO:0005506//iron ion binding	GO:0008152//metabolic process	gi|297824599|ref|XP_002880182.1|/1.69167e-85/CYP704A2 [Arabidopsis lyrata subsp. lyrata]
Unigene6092_NAU-LB	901	383	2220	103.068	473.766	2.20058	Up	1.31506e-228	2.03063e-226	K08488|1|3e-07|54.3|ath:AT1G32270|syntaxin 7	-	-	GO:0002252	gi|18399308|ref|NP_566396.1|/3.3959e-80/NDR1/HIN1-Like protein 1 [Arabidopsis thaliana]
CL6182.Contig1_NAU-LB	1341	42	243	7.59399	34.8428	2.19793	Up	1.96911e-26	3.7118e-25	-	GO:0005618//cell wall	GO:0030246//carbohydrate binding;GO:0016740//transferase activity	GO:0009628//response to abiotic stimulus	gi|297807869|ref|XP_002871818.1|/2.23073e-175/hypothetical protein ARALYDRAFT_488726 [Arabidopsis lyrata subsp. lyrata]
CL7383.Contig1_NAU-LB	1069	87	503	19.7329	90.4745	2.19691	Up	4.8502e-53	1.74623e-51	-	-	-	-	gi|297841499|ref|XP_002888631.1|/1.58382e-37/hypothetical protein ARALYDRAFT_894547 [Arabidopsis lyrata subsp. lyrata]
CL912.Contig2_NAU-LB	1326	11	63	2.0114	9.13552	2.18329	Up	9.23418e-08	5.90293e-07	K09338|1|1e-88|325|ath:AT3G01470|homeobox-leucine zipper protein	GO:0043231//intracellular membrane-bounded organelle	GO:0042802//identical protein binding;GO:0001071//nucleic acid binding transcription factor activity;GO:0003677//DNA binding	GO:0009416//response to light stimulus;GO:0006355//regulation of transcription, DNA-dependent;GO:0009887//organ morphogenesis;GO:0006970//response to osmotic stress	gi|312282149|dbj|BAJ33940.1|/1.41531e-89/unnamed protein product [Thellungiella halophila]
gi|156162863|gb|EW723009.1|EW723009	578	29	166	12.1652	55.2225	2.1825	Up	2.31706e-18	3.13542e-17	-	-	-	-	gi|116831654|gb|ABK28779.1|/1.4935e-08/unknown [Arabidopsis thaliana]
Unigene10341_NAU-LB	532	18	103	8.20371	37.2273	2.18201	Up	6.75806e-12	6.2675e-11	-	-	-	-	gi|15228700|ref|NP_191779.1|/5.81305e-35/Putative endonuclease or glycosyl hydrolase [Arabidopsis thaliana]
CL2422.Contig5_NAU-LB	1291	95	543	17.8421	80.8741	2.18039	Up	1.29163e-56	4.95174e-55	K03152|1|0.0|698|aly:ARALYDRAFT_478924|4-methyl-5(b-hydroxyethyl)-thiazole monophosphate biosynthesis	GO:0031090//organelle membrane;GO:0009536//plastid	-	GO:0006772//thiamine metabolic process;GO:0010038//response to metal ion	gi|33149230|gb|AAP96742.1|/0/ThiJ-like protein [Brassica rapa subsp. pekinensis]
CL912.Contig1_NAU-LB	1279	139	791	26.3508	118.916	2.17403	Up	2.03358e-81	1.11264e-79	K09338|1|1e-96|352|ath:AT3G01470|homeobox-leucine zipper protein	GO:0043231//intracellular membrane-bounded organelle	GO:0042802//identical protein binding;GO:0001071//nucleic acid binding transcription factor activity;GO:0003677//DNA binding	GO:0009416//response to light stimulus;GO:0006355//regulation of transcription, DNA-dependent;GO:0009887//organ morphogenesis;GO:0006970//response to osmotic stress	gi|312282149|dbj|BAJ33940.1|/4.73926e-103/unnamed protein product [Thellungiella halophila]
CL771.Contig3_NAU-LB	262	6	34	5.55264	24.9525	2.16794	Up	0.000112179	0.000471704	-	GO:0044464//cell part	GO:0017111//nucleoside-triphosphatase activity;GO:0015098//molybdate ion transmembrane transporter activity;GO:0032559	GO:0009207	gi|297810759|ref|XP_002873263.1|/1.60316e-32/abc transporter family protein [Arabidopsis lyrata subsp. lyrata]
Unigene19307_NAU-LB	1288	6	34	1.1295	5.07574	2.16794	Up	0.000112179	0.00047174	K13691|1|1e-116|417|pop:POPTR_810275|pathogen-inducible salicylic acid glucosyltransferase [EC:2.4.1.-]	-	GO:0035251//UDP-glucosyltransferase activity	GO:0034614//cellular response to reactive oxygen species;GO:0009414//response to water deprivation;GO:0009850//auxin metabolic process;GO:0042538//hyperosmotic salinity response;GO:0009737//response to abscisic acid stimulus;GO:0009653//anatomical structure morphogenesis	gi|15221233|ref|NP_172059.1|/0/Uridine diphosphate glycosyltransferase 74E2 [Arabidopsis thaliana]
Unigene25862_NAU-LB	496	9	51	4.39957	19.7708	2.16794	Up	1.84433e-06	1.01509e-05	-	GO:0016020//membrane	-	-	gi|18412503|ref|NP_565220.1|/1.96078e-60/uncharacterized protein [Arabidopsis thaliana]
Unigene19294_NAU-LB	1429	171	963	29.0144	129.578	2.15898	Up	6.54032e-98	4.32307e-96	-	-	-	-	gi|297808401|ref|XP_002872084.1|/2.57934e-76/hypothetical protein ARALYDRAFT_910412 [Arabidopsis lyrata subsp. lyrata]
Unigene15717_NAU-LB	950	34	191	8.6777	38.6586	2.1554	Up	1.28253e-20	1.93263e-19	-	GO:0009536//plastid	-	GO:0009411//response to UV	gi|312282609|dbj|BAJ34170.1|/3.21544e-108/unnamed protein product [Thellungiella halophila]
Unigene10018_NAU-LB	597	13	73	5.27981	23.5117	2.15482	Up	1.10669e-08	7.79029e-08	K03327|1|2e-58|223|aly:ARALYDRAFT_480065|multidrug resistance protein, MATE family	GO:0016020//membrane	GO:0015291//secondary active transmembrane transporter activity	GO:0015893//drug transport;GO:0000041//transition metal ion transport;GO:0051235	gi|297835708|ref|XP_002885736.1|/2.48725e-57/mate efflux family protein [Arabidopsis lyrata subsp. lyrata]
CL1210.Contig1_NAU-LB	849	28	156	7.9965	35.3308	2.14348	Up	5.46674e-17	6.91289e-16	K14556|1|2e-06|51.2|ath:AT3G21540|U3 small nucleolar RNA-associated protein 12	GO:0031234//extrinsic to internal side of plasma membrane	GO:0005488//binding;GO:0016740//transferase activity	-	gi|15230244|ref|NP_188525.1|/8.15721e-81/transducin/WD40 domain-containing protein [Arabidopsis thaliana]
gi|332781853|gb|FY437522.1|FY437522	817	7	39	2.07743	9.17865	2.14348	Up	3.77232e-05	0.000174212	K01647|1|3e-109|392|aly:ARALYDRAFT_483376|citrate synthase [EC:2.3.3.1]	GO:0042579//microbody	GO:0046912//transferase activity, transferring acyl groups, acyl groups converted into alkyl on transfer	GO:0009062//fatty acid catabolic process;GO:0009060//aerobic respiration;GO:0005975//carbohydrate metabolic process	gi|297827981|ref|XP_002881873.1|/3.27223e-108/hypothetical protein ARALYDRAFT_483376 [Arabidopsis lyrata subsp. lyrata]
CL1795.Contig1_NAU-LB	2335	128	711	13.2915	58.5489	2.13914	Up	6.27026e-72	3.03357e-70	K01006|1|0.0|1449|ath:AT4G15530|pyruvate,orthophosphate dikinase [EC:2.7.9.1]	GO:0009532//plastid stroma	GO:0043169//cation binding;GO:0032559;GO:0016781//phosphotransferase activity, paired acceptors	GO:0006796//phosphate-containing compound metabolic process	gi|79587721|ref|NP_849391.2|/0/pyruvate, phosphate dikinase 1 [Arabidopsis thaliana]
CL3398.Contig2_NAU-LB	386	67	372	42.0859	185.307	2.13851	Up	2.1568e-38	5.75861e-37	-	-	-	-	-
CL9843.Contig1_NAU-LB	526	11	61	5.07057	22.2987	2.13674	Up	2.17418e-07	1.33562e-06	-	-	-	-	gi|297802544|ref|XP_002869156.1|/5.70292e-43/binding protein [Arabidopsis lyrata subsp. lyrata]
CL771.Contig2_NAU-LB	1746	840	4651	116.65	512.198	2.13452	Up	0	0	K05681|1|2e-58|225|cme:CMS467C|ATP-binding cassette, subfamily G (WHITE), member 2;K12843|2|8e-44|176|vvi:100248403|U4/U6 small nuclear ribonucleoprotein PRP3;K05658|4|6e-10|64.3|bdi:100821986|ATP-binding cassette, subfamily B (MDR/TAP), member 1	GO:0044464//cell part	GO:0017111//nucleoside-triphosphatase activity;GO:0015098//molybdate ion transmembrane transporter activity;GO:0032559	GO:0009207	gi|297810759|ref|XP_002873263.1|/0/abc transporter family protein [Arabidopsis lyrata subsp. lyrata]
CL2535.Contig1_NAU-LB	1025	8	44	1.89241	8.25401	2.12487	Up	1.27624e-05	6.3062e-05	K05907|1|3e-148|522|ath:AT4G21990|adenylyl-sulfate reductase (glutathione) [EC:1.8.4.9]	GO:0031976;GO:0009532//plastid stroma	GO:0016667//oxidoreductase activity, acting on a sulfur group of donors	GO:0006790//sulfur compound metabolic process;GO:0019725//cellular homeostasis	gi|4033577|emb|CAA04611.1|/7.93336e-148/APS reductase [Brassica juncea]
gi|332787883|gb|FY442109.1|FY442109	825	10	55	2.93897	12.8187	2.12487	Up	9.69008e-07	5.48201e-06	-	GO:0044444//cytoplasmic part;GO:0016020//membrane	GO:0005543//phospholipid binding	-	gi|297814398|ref|XP_002875082.1|/2.17881e-83/hypothetical protein ARALYDRAFT_904366 [Arabidopsis lyrata subsp. lyrata]
Unigene13170_NAU-LB	1115	8	44	1.73966	7.58777	2.12487	Up	1.27624e-05	6.30676e-05	-	-	-	-	gi|297793907|ref|XP_002864838.1|/4.5626e-59/predicted protein [Arabidopsis lyrata subsp. lyrata]
CL2411.Contig1_NAU-LB	1689	256	1407	36.7502	160.177	2.12384	Up	2.2584e-139	2.08196e-137	K08176|1|0.0|868|aly:ARALYDRAFT_482913|MFS transporter, PHS family, inorganic phosphate transporter	GO:0043231//intracellular membrane-bounded organelle;GO:0031224//intrinsic to membrane	GO:0015291//secondary active transmembrane transporter activity;GO:0015103//inorganic anion transmembrane transporter activity	GO:0015698//inorganic anion transport;GO:0009725//response to hormone stimulus	gi|297823783|ref|XP_002879774.1|/0/hypothetical protein ARALYDRAFT_482913 [Arabidopsis lyrata subsp. lyrata]
gnl|UG|Rsa#S42013329	723	57	313	19.1155	83.2419	2.12257	Up	2.93136e-32	6.6674e-31	-	-	-	GO:0010039//response to iron ion;GO:0009723//response to ethylene stimulus;GO:0071241//cellular response to inorganic substance	gi|297793037|ref|XP_002864403.1|/4.2849e-42/hypothetical protein ARALYDRAFT_918705 [Arabidopsis lyrata subsp. lyrata]
CL3731.Contig1_NAU-LB	1079	38	208	8.53909	37.0662	2.11795	Up	7.07248e-22	1.12297e-20	K05666|1|1e-72|271|olu:OSTLU_35503|ATP-binding cassette, subfamily C (CFTR/MRP), member 2;K05658|3|8e-36|149|osa:9268765|ATP-binding cassette, subfamily B (MDR/TAP), member 1	-	GO:0017111//nucleoside-triphosphatase activity	-	gi|15230686|ref|NP_187915.1|/5.664e-176/ABC transporter C family member 3 [Arabidopsis thaliana]
gi|332783186|gb|FY440494.1|FY440494	606	30	164	12.0032	52.0364	2.1161	Up	1.57342e-17	2.0474e-16	K03113|1|1e-53|207|aly:ARALYDRAFT_918633|translation initiation factor 1	-	GO:0008135//translation factor activity, nucleic acid binding	GO:0006412//translation	gi|312282923|dbj|BAJ34327.1|/2.90447e-53/unnamed protein product [Thellungiella halophila]
CL3049.Contig5_NAU-LB	1026	78	425	18.433	79.6485	2.11135	Up	5.68932e-43	1.68494e-41	K01800|1|3e-110|396|ath:AT2G02390|maleylacetoacetate isomerase [EC:5.2.1.2]	GO:0044424//intracellular part	GO:0016859//cis-trans isomerase activity;GO:0016765//transferase activity, transferring alkyl or aryl (other than methyl) groups	GO:0006520//cellular amino acid metabolic process;GO:0009404//toxin metabolic process	gi|28932694|gb|AAO60040.1|/2.67174e-119/glutathione S-transferase zeta [Brassica napus]
CL8828.Contig1_NAU-LB	857	9	49	2.54631	10.9939	2.11022	Up	4.33894e-06	2.26583e-05	-	GO:0043231//intracellular membrane-bounded organelle	GO:0005488//binding	GO:0006810//transport	gi|297834204|ref|XP_002884984.1|/3.88128e-38/hypothetical protein ARALYDRAFT_897614 [Arabidopsis lyrata subsp. lyrata]
CL6362.Contig1_NAU-LB	1193	7	38	1.42268	6.12462	2.10601	Up	5.79218e-05	0.000256232	-	-	GO:0070011//peptidase activity, acting on L-amino acid peptides	GO:0019538//protein metabolic process	gi|297812797|ref|XP_002874282.1|/8.26873e-171/predicted protein [Arabidopsis lyrata subsp. lyrata]
CL6103.Contig2_NAU-LB	1876	59	319	7.62551	32.6959	2.10021	Up	1.95471e-32	4.47347e-31	-	GO:0043231//intracellular membrane-bounded organelle;GO:0030312//external encapsulating structure	GO:0016679//oxidoreductase activity, acting on diphenols and related substances as donors;GO:0046914//transition metal ion binding	GO:0032502//developmental process;GO:0009628//response to abiotic stimulus;GO:0008152//metabolic process;GO:0009267//cellular response to starvation	gi|18409745|ref|NP_565008.1|/0/cupredoxin-like protein [Arabidopsis thaliana]
gi|166138841|gb|FD570862.1|FD570862	668	8	43	2.90377	12.3774	2.0917	Up	1.95398e-05	9.45591e-05	K14487|1|5e-31|132|ath:AT5G13360|auxin responsive GH3 gene family	GO:0009532//plastid stroma	GO:0016744	GO:0006007//glucose catabolic process;GO:0010038//response to metal ion;GO:0009725//response to hormone stimulus	gi|334187658|ref|NP_001190301.1|/5.52307e-30/auxin-responsive GH3 family protein [Arabidopsis thaliana]
gnl|UG|Rsa#S42007471	723	15	80	5.0304	21.2759	2.08048	Up	4.71788e-09	3.4323e-08	-	-	GO:0005488//binding	-	gi|8778830|gb|AAF79829.1|AC026875_9/1.22052e-28/T6D22.27 [Arabidopsis thaliana]
CL5154.Contig2_NAU-LB	499	18	96	8.74624	36.9919	2.08048	Up	1.30142e-10	1.08252e-09	K00924|1|2e-45|179|ath:AT4G35600|[EC:2.7.1.-];K05658|4|4e-22|102|vvi:100262734|ATP-binding cassette, subfamily B (MDR/TAP), member 1	GO:0016020//membrane	GO:0004672//protein kinase activity;GO:0032559	GO:0006464//cellular protein modification process	gi|49066036|sp|P27450.2|CX32_ARATH/2.00929e-44/RecName: Full=Probable serine/threonine-protein kinase Cx32, chloroplastic; Flags: Precursor
gi|166125366|gb|FD558806.1|FD558806	745	9	48	2.92911	12.3886	2.08048	Up	6.62776e-06	3.4032e-05	K08341|1|4e-53|206|aly:ARALYDRAFT_915092|GABA(A) receptor-associated protein (autophagy-related protein 8)	GO:0005773//vacuole	GO:0004871//signal transducer activity;GO:0015631//tubulin binding	GO:0031669//cellular response to nutrient levels	gi|297824561|ref|XP_002880163.1|/5.27095e-59/At2g45170/T14P1.2 [Arabidopsis lyrata subsp. lyrata]
Unigene12536_NAU-LB	1040	24	127	5.59535	23.4805	2.06916	Up	1.55541e-13	1.60356e-12	-	GO:0009536//plastid	-	-	gi|18394056|ref|NP_563935.1|/6.50651e-105/uncharacterized protein [Arabidopsis thaliana]
gi|332775394|gb|FY434712.1|FY434712	756	32	169	10.2631	42.9834	2.06632	Up	1.56199e-17	2.03347e-16	-	-	-	-	gi|15239504|ref|NP_197956.1|/3.75833e-68/uncharacterized protein [Arabidopsis thaliana]
CL9546.Contig1_NAU-LB	669	83	437	30.0816	125.601	2.06189	Up	6.96594e-43	2.05536e-41	-	-	-	-	gi|297820388|ref|XP_002878077.1|/9.04066e-57/hypothetical protein ARALYDRAFT_907071 [Arabidopsis lyrata subsp. lyrata]
gnl|UG|Rsa#S41999510	826	8	42	2.34833	9.77699	2.05775	Up	2.98224e-05	0.000138821	K14638|1|2e-30|130|mtr:MTR_4g015080|solute carrier family 15 (peptide/histidine transporter), member 3/4	GO:0016020//membrane	GO:0046872//metal ion binding	GO:0051707//response to other organism;GO:0015833//peptide transport	gi|312282907|dbj|BAJ34319.1|/3.23438e-79/unnamed protein product [Thellungiella halophila]
Unigene22142_NAU-LB	511	9	47	4.27042	17.6853	2.0501	Up	1.00949e-05	5.03918e-05	-	-	-	-	gi|116830139|gb|ABK28027.1|/2.72906e-28/unknown [Arabidopsis thaliana]
Unigene5966_NAU-LB	2135	543	2832	61.6668	255.054	2.04823	Up	3.74806e-266	6.83118e-264	-	GO:0043231//intracellular membrane-bounded organelle	-	-	gi|357436159|ref|XP_003588355.1|/2.40486e-169/Mitochondrial protein, putative [Medicago truncatula]
CL4433.Contig1_NAU-LB	1143	45	234	9.54587	39.3646	2.04395	Up	2.01076e-23	3.37183e-22	-	GO:0043231//intracellular membrane-bounded organelle	-	GO:0009725//response to hormone stimulus;GO:0009642//response to light intensity;GO:0006970//response to osmotic stress;GO:0044237//cellular metabolic process;GO:0009743//response to carbohydrate stimulus;GO:0040007//growth	gi|114437173|gb|ABI74691.1|/5.95604e-70/C2H2 zinc finger protein [Brassica carinata]
CL7233.Contig1_NAU-LB	1488	16	83	2.60715	10.7253	2.04048	Up	3.75646e-09	2.75995e-08	-	GO:0031225//anchored to membrane	-	-	gi|297815326|ref|XP_002875546.1|/0/hypothetical protein ARALYDRAFT_484733 [Arabidopsis lyrata subsp. lyrata]
Unigene8614_NAU-LB	756	24	124	7.69731	31.5381	2.03467	Up	5.37196e-13	5.35069e-12	-	-	-	-	gi|297791713|ref|XP_002863741.1|/1.25987e-39/hypothetical protein ARALYDRAFT_917455 [Arabidopsis lyrata subsp. lyrata]
CL8643.Contig2_NAU-LB	1560	61	313	9.48101	38.5794	2.02472	Up	1.7794e-30	3.82206e-29	K00457|1|0.0|795|aly:ARALYDRAFT_887861|4-hydroxyphenylpyruvate dioxygenase [EC:1.13.11.27]	GO:0009536//plastid	GO:0016702//oxidoreductase activity, acting on single donors with incorporation of molecular oxygen, incorporation of two atoms of oxygen;GO:0005515//protein binding	GO:0045426//quinone cofactor biosynthetic process;GO:0042360//vitamin E metabolic process;GO:0006520//cellular amino acid metabolic process;GO:0016109	gi|377657569|gb|AFB74218.1|/0/4-hydroxyphenylpyruvate dioxygenase [Brassica napus]
Unigene2469_NAU-LB	903	24	123	6.44426	26.1911	2.02299	Up	8.10024e-13	7.95696e-12	K00517|1|3e-72|270|ath:AT5G24960|[EC:1.14.-.-]	-	GO:0016491//oxidoreductase activity;GO:0005506//iron ion binding	GO:0008152//metabolic process	gi|297816020|ref|XP_002875893.1|/8.556e-116/CYP71A22 [Arabidopsis lyrata subsp. lyrata]
Unigene7940_NAU-LB	1387	8	41	1.3985	5.68386	2.02299	Up	4.53674e-05	0.000206597	K12133|1|3e-25|114|ath:AT1G01060|LATE ELONGATED HYPOCOTYL;K12134|2|1e-23|109|aly:ARALYDRAFT_904154|circadian clock associated 1	-	GO:0001071//nucleic acid binding transcription factor activity;GO:0005198//structural molecule activity	GO:0010038//response to metal ion;GO:0009725//response to hormone stimulus;GO:0048511//rhythmic process;GO:0006970//response to osmotic stress;GO:0032501//multicellular organismal process;GO:0006351//transcription, DNA-dependent;GO:0009664//plant-type cell wall organization	gi|119720798|gb|ABL97969.1|/2.4512e-124/EPR1 [Brassica rapa]
Unigene1415_NAU-LB	506	8	41	3.83344	15.5801	2.02299	Up	4.53674e-05	0.000206614	-	-	-	-	-
Unigene3863_NAU-LB	1318	9	46	1.65568	6.71087	2.01907	Up	1.53299e-05	7.48242e-05	K10526|1|1e-133|474|rcu:RCOM_1600450|OPC-8:0 CoA ligase 1 [EC:6.2.1.-]	GO:0042579//microbody	GO:0016491//oxidoreductase activity;GO:0016405//CoA-ligase activity	GO:0006725//cellular aromatic compound metabolic process;GO:0006950//response to stress;GO:0009694//jasmonic acid metabolic process	gi|8778604|gb|AAF79612.1|AC027665_13/5.19262e-177/F5M15.18 [Arabidopsis thaliana]
Unigene18052_NAU-LB	539	22	112	9.89654	39.9545	2.01336	Up	1.00121e-11	9.12252e-11	-	GO:0016020//membrane	GO:0015197//peptide transporter activity;GO:0015603	GO:0022414//reproductive process;GO:0009791//post-embryonic development;GO:0051707//response to other organism;GO:0000041//transition metal ion transport;GO:0010038//response to metal ion	gi|312282711|dbj|BAJ34221.1|/3.62986e-32/unnamed protein product [Thellungiella halophila]
CL8736.Contig3_NAU-LB	1071	11	56	2.49031	10.0539	2.01336	Up	1.7759e-06	9.80245e-06	-	-	-	-	gi|297807141|ref|XP_002871454.1|/1.73846e-76/hypothetical protein ARALYDRAFT_487941 [Arabidopsis lyrata subsp. lyrata]
Unigene4801_NAU-LB	909	24	122	6.40172	25.8067	2.01121	Up	1.21988e-12	1.1876e-11	-	-	-	-	gi|42573710|ref|NP_974951.1|/6.71839e-68/uncharacterized protein [Arabidopsis thaliana]
Unigene17724_NAU-LB	1098	13	66	2.87072	11.5579	2.00939	Up	2.0869e-07	1.28371e-06	-	GO:0043234//protein complex	GO:0019787//small conjugating protein ligase activity	GO:0006950//response to stress;GO:0016567//protein ubiquitination;GO:0002252;GO:0009743//response to carbohydrate stimulus	gi|297833972|ref|XP_002884868.1|/2.83851e-114/U-box domain-containing protein 24 [Arabidopsis lyrata subsp. lyrata]
CL7678.Contig1_NAU-LB	952	50	253	12.7345	51.0999	2.00457	Up	1.27176e-24	2.22665e-23	K04733|1|2e-45|181|smo:SELMODRAFT_159261|interleukin-1 receptor-associated kinase 4 [EC:2.7.11.1];K13430|2|8e-45|179|zma:100283091|serine/threonine-protein kinase PBS1 [EC:2.7.11.1]	GO:0043231//intracellular membrane-bounded organelle;GO:0016020//membrane	GO:0004672//protein kinase activity;GO:0032559	GO:0009725//response to hormone stimulus;GO:0006464//cellular protein modification process	gi|42566214|ref|NP_567204.3|/1.06545e-119/cysteine-rich receptor-like protein kinase 41 [Arabidopsis thaliana]
gi|167438789|gb|FD944788.1|FD944788	635	17	86	6.49119	26.0412	2.00424	Up	2.9659e-09	2.20122e-08	K02155|1|1e-43|174|mtr:MTR_4g072050|V-type H+-transporting ATPase 16kDa proteolipid subunit [EC:3.6.3.14]	GO:0016471//vacuolar proton-transporting V-type ATPase complex	GO:0005488//binding;GO:0015077//monovalent inorganic cation transmembrane transporter activity;GO:0019829//cation-transporting ATPase activity	GO:0015992//proton transport	gi|449432418|ref|XP_004133996.1|/1.49895e-42/PREDICTED: V-type proton ATPase 16 kDa proteolipid subunit-like [Cucumis sativus]
CL2886.Contig1_NAU-LB	870	45	227	12.5413	50.1698	2.00013	Up	3.49634e-22	5.61728e-21	K00517|1|4e-105|379|ath:AT5G25140|[EC:1.14.-.-]	GO:0016020//membrane	GO:0016491//oxidoreductase activity;GO:0005506//iron ion binding	GO:0008152//metabolic process	gi|15238720|ref|NP_197896.1|/5.4804e-104/cytochrome P450 71B13 [Arabidopsis thaliana]
CL4478.Contig1_NAU-LB	1070	95	478	21.5273	85.8974	1.99645	Up	6.32068e-45	1.95309e-43	-	-	-	-	gi|15238744|ref|NP_197314.1|/3.3703e-80/uncharacterized protein [Arabidopsis thaliana]
Unigene21605_NAU-LB	1263	7	35	1.34383	5.32845	1.98737	Up	0.000205218	0.00083403	K00924|1|1e-74|278|ath:AT5G22850|[EC:2.7.1.-]	GO:0031224//intrinsic to membrane	GO:0004175//endopeptidase activity	GO:0019538//protein metabolic process	gi|297848856|ref|XP_002892309.1|/0/aspartyl protease family protein [Arabidopsis lyrata subsp. lyrata]
gi|332795542|gb|FY449447.1|FY449447	831	17	85	4.96018	19.6677	1.98737	Up	4.46426e-09	3.24992e-08	-	GO:0005887//integral to plasma membrane	GO:0005267//potassium channel activity	GO:0030001//metal ion transport	gi|297821707|ref|XP_002878736.1|/5.77144e-84/potassium channel tetramerization domain-containing protein [Arabidopsis lyrata subsp. lyrata]
gnl|UG|Rsa#S42023597	812	9	45	2.68742	10.656	1.98737	Up	2.32078e-05	0.000110086	-	-	-	-	-
Unigene3802_NAU-LB	817	17	85	5.04518	20.0047	1.98737	Up	4.46426e-09	3.25034e-08	K03715|1|2e-139|493|aly:ARALYDRAFT_899522|1,2-diacylglycerol 3-beta-galactosyltransferase [EC:2.4.1.46]	GO:0009527//plastid outer membrane	GO:0005488//binding;GO:0035250//UDP-galactosyltransferase activity	GO:0009267//cellular response to starvation;GO:0032787//monocarboxylic acid metabolic process;GO:0030258//lipid modification;GO:0009247//glycolipid biosynthetic process	gi|297831780|ref|XP_002883772.1|/2.30779e-138/hypothetical protein ARALYDRAFT_899522 [Arabidopsis lyrata subsp. lyrata]
CL4475.Contig2_NAU-LB	971	56	279	13.9836	55.2486	1.9822	Up	1.24089e-26	2.35265e-25	K13067|1|3e-93|339|ath:AT1G67990|putative caffeoyl-CoA 3-O-methyltransferase [EC:2.1.1.-];K00588|2|1e-92|338|ath:AT1G24735|caffeoyl-CoA O-methyltransferase [EC:2.1.1.104]	GO:0044444//cytoplasmic part	GO:0043169//cation binding;GO:0008171//O-methyltransferase activity	GO:0006596//polyamine biosynthetic process;GO:0009699//phenylpropanoid biosynthetic process;GO:0006730//one-carbon metabolic process;GO:0009791//post-embryonic development	gi|297841531|ref|XP_002888647.1|/3.40957e-113/hypothetical protein ARALYDRAFT_475925 [Arabidopsis lyrata subsp. lyrata]
gnl|UG|Rsa#S42041129	830	42	209	12.2693	48.4177	1.98048	Up	2.69096e-20	3.99754e-19	K02997|1|2e-92|336|aly:ARALYDRAFT_494005|small subunit ribosomal protein S9e	GO:0015935//small ribosomal subunit	GO:0003723//RNA binding;GO:0005198//structural molecule activity	GO:0010467//gene expression	gi|297805734|ref|XP_002870751.1|/2.8577e-91/40S ribosomal protein S9 [Arabidopsis lyrata subsp. lyrata]
Unigene15724_NAU-LB	505	27	134	12.9635	51.0211	1.97664	Up	1.76554e-13	1.80779e-12	-	-	-	GO:0009267//cellular response to starvation	gi|30681072|ref|NP_850550.1|/4.52224e-11/induced by phosphate starvation1 [Arabidopsis thaliana]
gi|167447908|gb|FD953892.1|FD953892	755	19	94	6.10177	23.9396	1.9721	Up	8.06792e-10	6.2875e-09	-	GO:0016020//membrane	-	-	gi|21554138|gb|AAM63218.1|/2.55627e-16/unknown [Arabidopsis thaliana]
Unigene19655_NAU-LB	744	79	390	25.7456	100.792	1.96899	Up	2.5683e-36	6.46893e-35	K03676|1|1e-11|68.2|bdi:100821530|glutaredoxin 3	-	GO:0015036//disulfide oxidoreductase activity	GO:0019725//cellular homeostasis	gi|15234046|ref|NP_195030.1|/4.93346e-57/glutaredoxin-C6 [Arabidopsis thaliana]
Unigene5899_NAU-LB	526	15	74	6.91441	27.0509	1.968	Up	5.61302e-08	3.67474e-07	-	GO:0031224//intrinsic to membrane	GO:0005275//amine transmembrane transporter activity	GO:0015837//amine transport	gi|75262385|sp|Q9FF99.1|AAP7_ARATH/3.19357e-86/RecName: Full=Probable amino acid permease 7; AltName: Full=Amino acid transporter AAP7
Unigene21109_NAU-LB	897	15	73	4.0546	15.6483	1.94837	Up	8.42166e-08	5.40466e-07	-	GO:0043231//intracellular membrane-bounded organelle	GO:0001071//nucleic acid binding transcription factor activity	GO:0009642//response to light intensity;GO:0009813//flavonoid biosynthetic process;GO:0006355//regulation of transcription, DNA-dependent	gi|20466640|gb|AAM20637.1|/2.19643e-47/NAM-like protein [Arabidopsis thaliana]
Unigene12568_NAU-LB	1216	20	97	3.98791	15.3382	1.94342	Up	6.28942e-10	4.9319e-09	K13424|1|1e-23|109|osa:4327518|WRKY transcription factor 33	-	GO:0001071//nucleic acid binding transcription factor activity;GO:0043565//sequence-specific DNA binding	GO:0009267//cellular response to starvation;GO:0009743//response to carbohydrate stimulus;GO:0006355//regulation of transcription, DNA-dependent	gi|206574987|gb|ACI14403.1|/1.55517e-164/WRKY6-1 transcription factor [Brassica napus]
CL1221.Contig3_NAU-LB	1120	67	324	14.5046	55.6241	1.9392	Up	7.3083e-30	1.5348e-28	K11838|1|2e-12|71.6|osa:4352242|ubiquitin carboxyl-terminal hydrolase 7 [EC:3.1.2.15]	-	-	-	gi|18411442|ref|NP_567187.1|/2.57736e-86/TRAF-like family protein [Arabidopsis thaliana]
CL3352.Contig2_NAU-LB	1519	18	87	2.87319	11.0128	1.93846	Up	5.21686e-09	3.78294e-08	-	-	-	GO:0042742//defense response to bacterium;GO:0010033//response to organic substance	gi|27311581|gb|AAO00756.1|/0/Unknown protein [Arabidopsis thaliana]
CL7442.Contig1_NAU-LB	1134	128	615	27.3682	104.279	1.92988	Up	6.40368e-55	2.39069e-53	K00924|1|1e-68|258|ath:AT1G30270|[EC:2.7.1.-];K07198|3|3e-34|144|mtr:MTR_6g012990|5'-AMP-activated protein kinase, catalytic alpha subunit [EC:2.7.11.11]	-	GO:0004672//protein kinase activity;GO:0000166//nucleotide binding	GO:0006952//defense response;GO:0009987//cellular process	gi|297812715|ref|XP_002874241.1|/5.43271e-116/predicted protein [Arabidopsis lyrata subsp. lyrata]
CL1439.Contig2_NAU-LB	1101	19	91	4.18423	15.8924	1.9253	Up	2.70448e-09	2.01717e-08	K10631|1|3e-06|51.2|vvi:100259613|E3 ubiquitin-protein ligase Topors [EC:6.3.2.19]	-	GO:0046914//transition metal ion binding	-	gi|297811359|ref|XP_002873563.1|/1.81372e-76/zinc finger family protein [Arabidopsis lyrata subsp. lyrata]
CL3653.Contig1_NAU-LB	783	52	249	16.1024	61.1468	1.925	Up	4.35816e-23	7.2383e-22	-	GO:0044464//cell part	-	GO:0006950//response to stress	gi|18412668|ref|NP_565230.1|/1.00211e-50/tetratricopeptide repeat domain-containing protein [Arabidopsis thaliana]
Unigene13426_NAU-LB	581	9	43	3.75592	14.2308	1.92178	Up	5.26742e-05	0.000236004	K08819|1|4e-07|52.8|mtr:MTR_7g114300|cyclin-dependent kinase 12/13 [EC:2.7.11.22 2.7.11.23]	GO:0043231//intracellular membrane-bounded organelle;GO:0016020//membrane	GO:0004672//protein kinase activity;GO:0032559	GO:0006464//cellular protein modification process	gi|449439293|ref|XP_004137420.1|/5.20246e-09/PREDICTED: probable serine/threonine-protein kinase At1g54610-like [Cucumis sativus]
Unigene8081_NAU-LB	1527	143	681	22.7063	85.752	1.91708	Up	4.05372e-60	1.65086e-58	-	-	GO:0005488//binding;GO:0001071//nucleic acid binding transcription factor activity	GO:0006351//transcription, DNA-dependent;GO:0048506	gi|290465632|gb|ADD25169.1|/2.93411e-166/putative dof zinc finger protein [Brassica napus]
Unigene229_NAU-LB	554	50	236	21.8831	81.9103	1.90422	Up	1.14534e-21	1.80211e-20	-	-	-	-	-
Unigene19599_NAU-LB	569	10	47	4.26125	15.8826	1.8981	Up	2.6737e-05	0.000125616	K00327|1|4e-38|155|ath:AT4G30210|NADPH-ferrihemoprotein reductase [EC:1.6.2.4]	GO:0009536//plastid	GO:0005488//binding;GO:0003824//catalytic activity	GO:0006725//cellular aromatic compound metabolic process	gi|312282025|dbj|BAJ33878.1|/9.83189e-42/unnamed protein product [Thellungiella halophila]
Unigene6112_NAU-LB	438	13	61	7.19646	26.7788	1.89574	Up	1.59087e-06	8.83022e-06	-	GO:0044464//cell part	-	-	gi|297800120|ref|XP_002867944.1|/2.31211e-55/hypothetical protein ARALYDRAFT_492924 [Arabidopsis lyrata subsp. lyrata]
Unigene22711_NAU-LB	399	14	65	8.50755	31.324	1.88045	Up	8.14852e-07	4.70323e-06	-	-	GO:0003824//catalytic activity	-	gi|15240090|ref|NP_196275.1|/1.63101e-48/alpha/beta hydrolase fold-containing protein [Arabidopsis thaliana]
CL379.Contig2_NAU-LB	1489	11	51	1.79121	6.58585	1.87843	Up	1.35886e-05	6.68536e-05	K13289|1|0.0|917|ath:AT3G45010|cathepsin A (carboxypeptidase C) [EC:3.4.16.5]	GO:0044464//cell part	GO:0004180//carboxypeptidase activity	GO:0019538//protein metabolic process	gi|312282425|dbj|BAJ34078.1|/0/unnamed protein product [Thellungiella halophila]
CL5498.Contig1_NAU-LB	1088	63	291	14.0398	51.4281	1.87303	Up	7.81768e-26	1.43995e-24	K11778|1|3e-126|449|aly:ARALYDRAFT_496002|ditrans,polycis-polyprenyl diphosphate synthase [EC:2.5.1.87]	GO:0009536//plastid	GO:0004659//prenyltransferase activity	-	gi|297793407|ref|XP_002864588.1|/3.52924e-125/hypothetical protein ARALYDRAFT_496002 [Arabidopsis lyrata subsp. lyrata]
Unigene19358_NAU-LB	2107	268	1236	30.8404	112.795	1.87081	Up	2.63632e-104	1.84572e-102	K01177|1|0.0|1031|ath:AT3G23920|beta-amylase [EC:3.2.1.2]	GO:0043231//intracellular membrane-bounded organelle;GO:0044444//cytoplasmic part;GO:0016020//membrane	GO:0016772//transferase activity, transferring phosphorus-containing groups;GO:0016160//amylase activity;GO:0005102//receptor binding;GO:0043167//ion binding;GO:0032559	GO:0005982//starch metabolic process;GO:0009933//meristem structural organization;GO:0007167//enzyme linked receptor protein signaling pathway;GO:0010073//meristem maintenance;GO:0003006//developmental process involved in reproduction;GO:0006950//response to stress;GO:0006464//cellular protein modification process	gi|17224922|gb|AAL37169.1|AF319168_1/0/putative chloroplast-targeted beta-amylase [Brassica napus]
CL1644.Contig1_NAU-LB	745	50	230	16.2728	59.3619	1.86707	Up	1.20437e-20	1.81732e-19	K09422|1|3e-77|286|aly:ARALYDRAFT_496112|myb proto-oncogene protein, plant	GO:0043231//intracellular membrane-bounded organelle	GO:0003676//nucleic acid binding;GO:0001071//nucleic acid binding transcription factor activity	GO:0009725//response to hormone stimulus;GO:0006351//transcription, DNA-dependent;GO:0009743//response to carbohydrate stimulus;GO:0010038//response to metal ion	gi|297796929|ref|XP_002866349.1|/3.66242e-76/hypothetical protein ARALYDRAFT_496112 [Arabidopsis lyrata subsp. lyrata]
Unigene10306_NAU-LB	839	25	115	7.22483	26.3555	1.86707	Up	5.22724e-11	4.50228e-10	-	-	-	-	gi|8778340|gb|AAF79348.1|AC007887_7/3.77236e-06/F15O4.13 [Arabidopsis thaliana]
Unigene22120_NAU-LB	252	13	59	12.5081	45.0181	1.84764	Up	3.5226e-06	1.87224e-05	-	-	-	-	gi|42733544|dbj|BAD11207.1|/1.17176e-06/multidrug resistance-associated protein [Thlaspi caerulescens]
CL2789.Contig1_NAU-LB	1310	16	72	2.96141	10.5681	1.83536	Up	3.1713e-07	1.92162e-06	K08900|1|3e-69|260|pop:POPTR_271862|mitochondrial chaperone BCS1;K13120|5|1e-58|225|vvi:100263357|protein FAM32A	GO:0044464//cell part	GO:0017111//nucleoside-triphosphatase activity;GO:0032559	-	gi|30690453|ref|NP_182185.2|/4.35341e-176/P-loop containing nucleoside triphosphate hydrolase-like protein [Arabidopsis thaliana]
CL7053.Contig1_NAU-LB	973	28	126	6.97742	24.8997	1.83536	Up	1.07136e-11	9.71704e-11	K12135|1|7e-17|86.3|aly:ARALYDRAFT_488429|zinc finger protein CONSTANS	GO:0044464//cell part	GO:0046914//transition metal ion binding;GO:0001071//nucleic acid binding transcription factor activity	GO:0006351//transcription, DNA-dependent	gi|22329245|ref|NP_195607.2|/3.22229e-95/B-box type zinc finger-containing protein [Arabidopsis thaliana]
Unigene6384_NAU-LB	285	9	40	7.6568	26.9868	1.81744	Up	0.000175438	0.000723528	-	-	-	GO:0009628//response to abiotic stimulus	gi|15242850|ref|NP_200579.1|/3.41524e-06/heat shock protein-like protein [Arabidopsis thaliana]
CL6087.Contig2_NAU-LB	948	34	151	8.69601	30.627	1.81638	Up	1.40307e-13	1.45243e-12	-	GO:0043231//intracellular membrane-bounded organelle	GO:0001948//glycoprotein binding	GO:0051707//response to other organism	gi|15235205|ref|NP_193719.1|/2.32043e-82/protein PHLOEM protein 2-LIKE A1 [Arabidopsis thaliana]
Unigene24172_NAU-LB	779	14	62	4.35753	15.3035	1.81228	Up	2.65724e-06	1.43272e-05	K01931|1|1e-23|108|ppp:PHYPADRAFT_182911|protein neuralized [EC:6.3.2.19];K15688|3|4e-08|56.6|smo:SELMODRAFT_231449|E3 ubiquitin-protein ligase MUL1 [EC:6.3.2.19]	-	GO:0046872//metal ion binding	-	gi|255585558|ref|XP_002533469.1|/4.73682e-53/S-adenosylmethionine-dependent methyltransferase, putative [Ricinus communis]
CL1259.Contig2_NAU-LB	536	15	66	6.78541	23.6764	1.80294	Up	1.35417e-06	7.57923e-06	K00106|1|1e-93|340|aly:ARALYDRAFT_912004|xanthine dehydrogenase/oxidase [EC:1.17.1.4 1.17.3.2]	-	GO:0016726//oxidoreductase activity, acting on CH or CH2 groups, NAD or NADP as acceptor;GO:0046914//transition metal ion binding;GO:0051536//iron-sulfur cluster binding;GO:0016727;GO:0050662//coenzyme binding	GO:0006144//purine nucleobase metabolic process;GO:0006979//response to oxidative stress;GO:0006801//superoxide metabolic process	gi|297814095|ref|XP_002874931.1|/1.05553e-92/ATXDH1 [Arabidopsis lyrata subsp. lyrata]
CL5787.Contig1_NAU-LB	1024	10	44	2.36782	8.26207	1.80294	Up	8.81846e-05	0.000383006	K09422|1|2e-113|407|ath:AT1G25340|myb proto-oncogene protein, plant	GO:0043231//intracellular membrane-bounded organelle	GO:0003676//nucleic acid binding;GO:0001071//nucleic acid binding transcription factor activity	GO:0009267//cellular response to starvation;GO:0006351//transcription, DNA-dependent;GO:0009685//gibberellin metabolic process;GO:0010033//response to organic substance	gi|18395645|ref|NP_564230.1|/2.10719e-116/myb domain protein 116 [Arabidopsis thaliana]
gnl|UG|Rsa#S42001383	792	13263	58059	4060.37	14095.5	1.79555	Up	0	0	-	-	-	-	-
Unigene16046_NAU-LB	739	17	74	5.57768	19.2541	1.78743	Up	3.52848e-07	2.12692e-06	-	-	-	-	gi|18402437|ref|NP_566652.1|/2.46403e-48/uncharacterized protein [Arabidopsis thaliana]
Unigene14590_NAU-LB	1820	56	243	7.46047	25.6727	1.7829	Up	1.64851e-20	2.47205e-19	-	GO:0043231//intracellular membrane-bounded organelle	GO:0051184	GO:0043623//cellular protein complex assembly;GO:0051181//cofactor transport	gi|353526479|ref|YP_004927549.1|/0/ccmFN1 (mitochondrion) [Brassica carinata]
Unigene5514_NAU-LB	577	15	65	6.30326	21.6608	1.78091	Up	1.99447e-06	1.08484e-05	-	-	-	-	-
Unigene9641_NAU-LB	1007	13	56	3.13014	10.6929	1.77235	Up	1.13697e-05	5.66235e-05	-	GO:0044464//cell part	GO:0015197//peptide transporter activity	GO:0015833//peptide transport;GO:0009628//response to abiotic stimulus	gi|21592665|gb|AAM64614.1|/0/Isp4-like protein [Arabidopsis thaliana]
gi|167442295|gb|FD948117.1|FD948117	517	19	81	8.91071	30.1252	1.75736	Up	1.3526e-07	8.50562e-07	K15378|1|6e-27|118|aly:ARALYDRAFT_895034|solute carrier family 45, member 1/2/4	GO:0043231//intracellular membrane-bounded organelle;GO:0016021//integral to membrane	GO:0015573//beta-glucoside transmembrane transporter activity;GO:0015154;GO:0005351//sugar:hydrogen symporter activity	GO:0051707//response to other organism;GO:0009856//pollination;GO:0015766;GO:0015759//beta-glucoside transport;GO:0009908//flower development;GO:0000017//alpha-glucoside transport	gi|18091779|gb|AAL58071.1|/2.65071e-26/sucrose transporter SUC1 [Brassica oleracea]
Unigene6574_NAU-LB	2205	24	102	2.63908	8.89463	1.7529	Up	3.27196e-09	2.42352e-08	K01537|1|0.0|1140|aly:ARALYDRAFT_486846|Ca2+-transporting ATPase [EC:3.6.3.8]	GO:0031224//intrinsic to membrane	GO:0046873//metal ion transmembrane transporter activity;GO:0019829//cation-transporting ATPase activity;GO:0005515//protein binding;GO:0032559	GO:0009206;GO:0006816//calcium ion transport	gi|297821262|ref|XP_002878514.1|/0/hypothetical protein ARALYDRAFT_486846 [Arabidopsis lyrata subsp. lyrata]
Unigene20581_NAU-LB	1009	13	55	3.12393	10.4811	1.74636	Up	1.67051e-05	8.12867e-05	K01183|1|8e-82|301|pop:POPTR_1116414|chitinase [EC:3.2.1.14]	GO:0005618//cell wall;GO:0005576//extracellular region	GO:0004553//hydrolase activity, hydrolyzing O-glycosyl compounds;GO:0030247//polysaccharide binding	GO:0006026	gi|297828065|ref|XP_002881915.1|/1.92215e-122/hypothetical protein ARALYDRAFT_346169 [Arabidopsis lyrata subsp. lyrata]
CL2364.Contig1_NAU-LB	1476	13	55	2.13553	7.16494	1.74636	Up	1.67051e-05	8.12938e-05	K13354|1|1e-87|322|smo:SELMODRAFT_160785|solute carrier family 25 (peroxisomal adenine nucleotide transporter), member 17;K00133|2|1e-29|129|ota:Ot01g02440|aspartate-semialdehyde dehydrogenase [EC:1.2.1.11]	GO:0031224//intrinsic to membrane;GO:0019866//organelle inner membrane;GO:0042579//microbody	GO:0000295//adenine nucleotide transmembrane transporter activity	GO:0015868//purine ribonucleotide transport;GO:0009850//auxin metabolic process;GO:0009062//fatty acid catabolic process;GO:0009791//post-embryonic development;GO:0046907//intracellular transport	gi|297808769|ref|XP_002872268.1|/1.07535e-141/mitochondrial substrate carrier family protein [Arabidopsis lyrata subsp. lyrata]
Unigene21751_NAU-LB	696	10	42	3.4837	11.6032	1.73583	Up	0.000191938	0.000788535	-	-	-	-	gi|28393545|gb|AAO42193.1|/2.4248e-39/unknown protein [Arabidopsis thaliana]
gi|166113406|gb|FD546446.1|FD546446	717	11	46	3.71983	12.336	1.72957	Up	9.6324e-05	0.000414215	K05759|1|5e-66|248|aly:ARALYDRAFT_918819|profilin	GO:0005856//cytoskeleton;GO:0043231//intracellular membrane-bounded organelle	GO:0008092//cytoskeletal protein binding	GO:0007010//cytoskeleton organization	gi|156778061|gb|ABU95412.1|/3.42246e-68/Sin a 4 allergen [Sinapis alba]
gi|332786752|gb|FY445276.1|FY445276	835	12	50	3.48453	11.5138	1.72433	Up	4.84858e-05	0.000220005	K14488|1|1e-82|304|ath:AT3G60690|SAUR family protein	-	-	GO:0009725//response to hormone stimulus	gi|312283221|dbj|BAJ34476.1|/1.17811e-84/unnamed protein product [Thellungiella halophila]
Unigene4099_NAU-LB	1659	19	79	2.77688	9.15623	1.72129	Up	2.88662e-07	1.75199e-06	K09060|1|7e-149|525|ath:AT2G46270|plant G-box-binding factor	GO:0044444//cytoplasmic part	GO:0003677//DNA binding	GO:0009725//response to hormone stimulus;GO:0006351//transcription, DNA-dependent	gi|1399005|gb|AAB03378.1|/3.59711e-165/transcription factor [Brassica napus]
CL4528.Contig2_NAU-LB	1850	288	1195	37.7459	124.203	1.71831	Up	4.83692e-90	2.91943e-88	-	-	-	-	gi|42565925|ref|NP_191014.2|/0/uncharacterized protein [Arabidopsis thaliana]
Unigene11614_NAU-LB	1577	105470	436892	16216.1	53269.5	1.71588	Up	0	0	-	-	-	-	gi|11994112|dbj|BAB01115.1|/2.14901e-10/unnamed protein product [Arabidopsis thaliana]
CL2342.Contig1_NAU-LB	972	135	559	33.6757	110.581	1.71533	Up	6.31002e-43	1.86579e-41	K08233|1|6e-80|295|ath:AT2G23610|polyneuridine-aldehyde esterase [EC:3.1.1.78]	-	GO:0004091//carboxylesterase activity	GO:0006725//cellular aromatic compound metabolic process;GO:0031407//oxylipin metabolic process;GO:0009814//defense response, incompatible interaction;GO:0050832//defense response to fungus	gi|297825259|ref|XP_002880512.1|/1.82054e-90/predicted protein [Arabidopsis lyrata subsp. lyrata]
CL4528.Contig1_NAU-LB	487	22	91	10.9533	35.9293	1.7138	Up	3.85664e-08	2.56229e-07	-	-	-	-	gi|42565925|ref|NP_191014.2|/9.18989e-44/uncharacterized protein [Arabidopsis thaliana]
Unigene19723_NAU-LB	1152	26	106	5.47231	17.6925	1.69292	Up	3.86436e-09	2.8381e-08	K05283|1|4e-13|73.9|aly:ARALYDRAFT_354960|phosphatidylinositol glycan, class W [EC:2.3.-.-];K11982|2|7e-08|56.6|bdi:100833984|E3 ubiquitin-protein ligase RNF115/126 [EC:6.3.2.19];K15692|5|6e-07|53.5|smo:SELMODRAFT_66937|E3 ubiquitin-protein ligase RNF13 [EC:6.3.2.19]	-	GO:0046872//metal ion binding	GO:0006950//response to stress;GO:0009743//response to carbohydrate stimulus	gi|297804618|ref|XP_002870193.1|/4.93252e-56/hypothetical protein ARALYDRAFT_329916 [Arabidopsis lyrata subsp. lyrata]
Unigene6103_NAU-LB	441	19	77	10.4463	33.5729	1.6843	Up	6.10554e-07	3.56926e-06	-	-	-	-	-
CL2769.Contig2_NAU-LB	2041	692	2802	82.2077	263.974	1.68305	Up	1.04917e-202	1.41216e-200	K09840|1|0.0|949|aly:ARALYDRAFT_914743|9-cis-epoxycarotenoid dioxygenase [EC:1.13.11.51]	GO:0009570//chloroplast stroma	GO:0005488//binding;GO:0016701//oxidoreductase activity, acting on single donors with incorporation of molecular oxygen	-	gi|297804226|ref|XP_002869997.1|/0/nine-cis-epoxycarotenoid dioxygenase 4 [Arabidopsis lyrata subsp. lyrata]
CL4517.Contig1_NAU-LB	1368	54	218	9.571	30.6413	1.67873	Up	3.46834e-17	4.42916e-16	K01078|1|2e-115|414|ath:AT1G14700|acid phosphatase [EC:3.1.3.2]	GO:0044464//cell part	GO:0016791//phosphatase activity	GO:0072502;GO:0006796//phosphate-containing compound metabolic process;GO:0000302//response to reactive oxygen species	gi|295854821|gb|ADG45867.1|/0/purple acid phosphatase 17 isoform 2 [Brassica rapa]
Unigene10342_NAU-LB	1418	110	442	18.809	59.9352	1.67198	Up	3.94474e-33	9.17507e-32	-	-	-	-	gi|297821118|ref|XP_002878442.1|/4.18312e-95/hypothetical protein ARALYDRAFT_486728 [Arabidopsis lyrata subsp. lyrata]
CL6613.Contig1_NAU-LB	1701	13	52	1.85306	5.87808	1.66544	Up	5.20006e-05	0.000233024	-	GO:0031224//intrinsic to membrane	GO:0015174//basic amino acid transmembrane transporter activity;GO:0015172//acidic amino acid transmembrane transporter activity;GO:0015179//L-amino acid transmembrane transporter activity	GO:0006865//amino acid transport	gi|19347737|gb|AAL86294.1|/0/putative amino acid or GABA permease [Arabidopsis thaliana]
gi|154258280|gb|EV569303.1|EV569303	655	13	52	4.81229	15.265	1.66544	Up	5.20006e-05	0.000233043	-	-	-	-	-
Unigene20270_NAU-LB	1701	19	76	2.70831	8.59103	1.66544	Up	8.84874e-07	5.05075e-06	-	-	-	-	gi|22328264|ref|NP_192212.2|/0/F-box/kelch-repeat protein OR23 [Arabidopsis thaliana]
gi|167429674|gb|FD935031.1|FD935031	695	422	1668	147.223	461.474	1.64824	Up	5.66774e-118	4.48809e-116	-	-	-	-	-
CL2266.Contig2_NAU-LB	2081	19	75	2.21376	6.92987	1.64633	Up	1.27939e-06	7.18528e-06	-	-	-	GO:0006810//transport	gi|15225053|ref|NP_181454.1|/0/major facilitator protein [Arabidopsis thaliana]
CL187.Contig3_NAU-LB	916	28	110	7.4116	23.0905	1.63944	Up	4.42408e-09	3.22193e-08	K06689|1|1e-83|308|aly:ARALYDRAFT_478172|ubiquitin-conjugating enzyme E2 D/E [EC:6.3.2.19]	-	GO:0019787//small conjugating protein ligase activity;GO:0032559	GO:0019941//modification-dependent protein catabolic process;GO:0032446//protein modification by small protein conjugation	gi|18398206|ref|NP_566331.1|/1.28243e-82/ubiquitin-conjugating enzyme E2 11 [Arabidopsis thaliana]
gi|161573328|gb|EY944555.1|EY944555	323	12	47	9.008	27.979	1.63506	Up	0.000149941	0.000623977	-	-	-	-	gi|297850260|ref|XP_002893011.1|/2.59014e-14/hypothetical protein ARALYDRAFT_889295 [Arabidopsis lyrata subsp. lyrata]
Unigene10585_NAU-LB	234	19	74	19.6873	60.8068	1.62696	Up	1.84529e-06	1.01482e-05	-	-	-	-	gi|15238744|ref|NP_197314.1|/2.48389e-12/uncharacterized protein [Arabidopsis thaliana]
gnl|UG|Rsa#S42580537	764	17	66	5.39517	16.6107	1.62237	Up	7.13636e-06	3.64885e-05	K08241|1|6e-28|122|aly:ARALYDRAFT_472188|jasmonate O-methyltransferase [EC:2.1.1.141]	GO:0044464//cell part	GO:0008171//O-methyltransferase activity;GO:0008169//C-methyltransferase activity	GO:0009607//response to biotic stimulus;GO:0006950//response to stress;GO:0006730//one-carbon metabolic process;GO:0006631//fatty acid metabolic process;GO:0010038//response to metal ion	gi|37904506|gb|AAP57211.1|/9.45043e-75/methyl transferase [Arabidopsis lyrata subsp. lyrata]
Unigene4985_NAU-LB	1484	35	135	5.71852	17.4919	1.61297	Up	1.24325e-10	1.03522e-09	K00924|1|2e-54|211|aly:ARALYDRAFT_313416|[EC:2.7.1.-];K04733|2|3e-54|211|smo:SELMODRAFT_159261|interleukin-1 receptor-associated kinase 4 [EC:2.7.11.1];K13418|3|4e-54|210|vvi:100247683|somatic embryogenesis receptor kinase 1 [EC:2.7.10.1 2.7.11.1];K13417|5|2e-53|208|aly:ARALYDRAFT_899604|somatic embryogenesis receptor kinase 4 [EC:2.7.10.1 2.7.11.1]	GO:0044464//cell part	GO:0004871//signal transducer activity;GO:0030246//carbohydrate binding;GO:0019899//enzyme binding;GO:0004674//protein serine/threonine kinase activity;GO:0032559	GO:0006464//cellular protein modification process;GO:0008037//cell recognition	gi|297799260|ref|XP_002867514.1|/0/hypothetical protein ARALYDRAFT_492068 [Arabidopsis lyrata subsp. lyrata]
Unigene11205_NAU-LB	566	14	54	5.99737	18.3448	1.61297	Up	5.49708e-05	0.00024454	K01188|1|1e-09|61.2|vvi:100255282|beta-glucosidase [EC:3.2.1.21]	GO:0044464//cell part	GO:0015144//carbohydrate transmembrane transporter activity	GO:0006810//transport	gi|30697543|ref|NP_200960.2|/1.1424e-50/sugar transport protein 3 [Arabidopsis thaliana]
Unigene2336_NAU-LB	770	13	50	4.09357	12.4858	1.60885	Up	0.000109036	0.000466392	-	-	-	-	gi|297836450|ref|XP_002886107.1|/1.88538e-46/predicted protein [Arabidopsis lyrata subsp. lyrata]
gnl|UG|Rsa#S41992105	681	24	92	8.54503	25.9763	1.60404	Up	1.32194e-07	8.32127e-07	-	GO:0043231//intracellular membrane-bounded organelle	-	-	gi|32395571|gb|AAP37967.1|/1.04117e-47/seed specific protein Bn15D1B [Brassica napus]
Unigene7267_NAU-LB	540	12	46	5.38812	16.3795	1.60404	Up	0.000216868	0.000879897	-	-	-	-	-
CL2266.Contig3_NAU-LB	1982	20	76	2.44667	7.37303	1.59144	Up	1.941e-06	1.05939e-05	-	-	-	GO:0006810//transport	gi|15225053|ref|NP_181454.1|/0/major facilitator protein [Arabidopsis thaliana]
CL6116.Contig1_NAU-LB	979	53	201	13.1263	39.4775	1.58857	Up	7.2205e-15	8.05499e-14	-	-	-	-	-
gnl|UG|Rsa#S41998554	844	36	136	10.3421	30.9836	1.58298	Up	1.86844e-10	1.5351e-09	-	GO:0044464//cell part	-	-	gi|341958528|sp|E4MWF4.1|CSPL1_THEHA/5.5689e-66/RecName: Full=CASP-like protein 1
CL6583.Contig2_NAU-LB	967	31	117	7.77293	23.2646	1.58161	Up	3.61998e-09	2.66531e-08	-	-	-	-	gi|297824685|ref|XP_002880225.1|/1.8563e-103/hypothetical protein ARALYDRAFT_483769 [Arabidopsis lyrata subsp. lyrata]
CL2993.Contig3_NAU-LB	1506	64	240	10.304	30.6424	1.57233	Up	3.04708e-17	3.90917e-16	K03327|1|0.0|806|aly:ARALYDRAFT_496771|multidrug resistance protein, MATE family	GO:0044464//cell part	GO:0015291//secondary active transmembrane transporter activity	GO:0003006//developmental process involved in reproduction;GO:0015893//drug transport	gi|297797567|ref|XP_002866668.1|/0/hypothetical protein ARALYDRAFT_496771 [Arabidopsis lyrata subsp. lyrata]
Unigene21538_NAU-LB	1466	31	116	5.12716	15.2146	1.56922	Up	5.16048e-09	3.74499e-08	K13415|1|3e-34|144|rcu:RCOM_0478150|protein brassinosteroid insensitive 1 [EC:2.7.10.1 2.7.11.1]	-	-	GO:0006952//defense response;GO:0050789//regulation of biological process	gi|297838981|ref|XP_002887372.1|/2.53718e-135/hypothetical protein ARALYDRAFT_476271 [Arabidopsis lyrata subsp. lyrata]
Unigene22348_NAU-LB	881	28	104	7.70605	22.6983	1.55852	Up	3.80002e-08	2.52618e-07	K03327|1|2e-57|220|aly:ARALYDRAFT_479865|multidrug resistance protein, MATE family	GO:0044464//cell part	GO:0015291//secondary active transmembrane transporter activity	GO:0015893//drug transport	gi|297835374|ref|XP_002885569.1|/2.51417e-56/hypothetical protein ARALYDRAFT_479865 [Arabidopsis lyrata subsp. lyrata]
CL4077.Contig1_NAU-LB	1247	42	156	8.16643	24.0544	1.55852	Up	1.44702e-11	1.30412e-10	-	GO:0005618//cell wall	GO:0016788//hydrolase activity, acting on ester bonds;GO:0016747//transferase activity, transferring acyl groups other than amino-acyl groups	GO:0000003//reproduction	gi|312282027|dbj|BAJ33879.1|/2.41868e-144/unnamed protein product [Thellungiella halophila]
CL3455.Contig2_NAU-LB	536	52	193	23.5227	69.2355	1.55745	Up	5.69118e-14	6.04215e-13	K00924|1|9e-34|140|osa:4342410|[EC:2.7.1.-];K07198|3|2e-25|113|smo:SELMODRAFT_450118|5'-AMP-activated protein kinase, catalytic alpha subunit [EC:2.7.11.11]	-	GO:0004674//protein serine/threonine kinase activity;GO:0032559	GO:0006952//defense response;GO:0006464//cellular protein modification process;GO:0023052//signaling	gi|297812715|ref|XP_002874241.1|/1.54196e-51/predicted protein [Arabidopsis lyrata subsp. lyrata]
CL5122.Contig2_NAU-LB	1409	347	1285	59.7129	175.359	1.5542	Up	4.34426e-84	2.44426e-82	K00122|1|0.0|708|aly:ARALYDRAFT_488325|formate dehydrogenase [EC:1.2.1.2]	GO:0009536//plastid	GO:0016620//oxidoreductase activity, acting on the aldehyde or oxo group of donors, NAD or NADP as acceptor;GO:0016614//oxidoreductase activity, acting on CH-OH group of donors;GO:0000166//nucleotide binding	GO:0006950//response to stress;GO:0008152//metabolic process;GO:0010038//response to metal ion	gi|297807495|ref|XP_002871631.1|/0/hypothetical protein ARALYDRAFT_488325 [Arabidopsis lyrata subsp. lyrata]
gi|154176884|gb|EV546225.1|EV546225	353	13	48	8.92931	26.1458	1.54996	Up	0.000225386	0.00090678	-	-	-	-	-
CL642.Contig1_NAU-LB	1170	77	284	15.9571	46.6733	1.5484	Up	9.93592e-20	1.43462e-18	K08235|1|1e-133|474|ath:AT4G30270|xyloglucan:xyloglucosyl transferase [EC:2.4.1.207];K14504|3|5e-122|436|aly:ARALYDRAFT_918931|xyloglucan:xyloglucosyl transferase TCH4 [EC:2.4.1.207]	GO:0005618//cell wall;GO:0005576//extracellular region;GO:0044424//intracellular part;GO:0016020//membrane	GO:0016798//hydrolase activity, acting on glycosyl bonds;GO:0016758//transferase activity, transferring hexosyl groups	GO:0044042//glucan metabolic process;GO:0010476//gibberellin mediated signaling pathway;GO:0009827//plant-type cell wall modification;GO:0032502//developmental process;GO:0006950//response to stress;GO:0009605//response to external stimulus	gi|365927262|gb|AEX07595.1|/2.20033e-144/xyloglucosyl transferase 2, partial [Brassica juncea]
Unigene6661_NAU-LB	912	42	154	11.1662	32.4685	1.53991	Up	2.90966e-11	2.55966e-10	-	-	GO:0004721//phosphoprotein phosphatase activity	GO:0006796//phosphate-containing compound metabolic process	gi|18412419|ref|NP_567261.1|/8.20155e-90/tyrosine specific protein phosphatase family protein [Arabidopsis thaliana]
Unigene540_NAU-LB	2740	48	176	4.24757	12.3509	1.53991	Up	1.12019e-12	1.09361e-11	K02132|1|0.0|956|ath:ArthMp100|F-type H+-transporting ATPase subunit alpha [EC:3.6.3.14]	GO:0031981//nuclear lumen;GO:0033178//proton-transporting two-sector ATPase complex, catalytic domain;GO:0019866//organelle inner membrane;GO:0030312//external encapsulating structure;GO:0009526//plastid envelope	GO:0046914//transition metal ion binding;GO:0019829//cation-transporting ATPase activity;GO:0015078//hydrogen ion transmembrane transporter activity;GO:0032559;GO:0008187//poly-pyrimidine tract binding	GO:0015988//energy coupled proton transmembrane transport, against electrochemical gradient;GO:0015986//ATP synthesis coupled proton transport;GO:0006950//response to stress	gi|112253900|ref|YP_717155.1|/0/ATPase subunit 1 [Brassica napus]
Unigene11684_NAU-LB	976	43	157	10.6824	30.9304	1.53379	Up	2.13014e-11	1.88916e-10	-	-	-	-	gi|297816960|ref|XP_002876363.1|/1.40801e-90/hypothetical protein ARALYDRAFT_907078 [Arabidopsis lyrata subsp. lyrata]
Unigene14945_NAU-LB	965	28	102	7.03526	20.324	1.53051	Up	7.6679e-08	4.9346e-07	-	-	-	-	gi|224057788|ref|XP_002299324.1|/8.48859e-40/predicted protein [Populus trichocarpa]
CL541.Contig1_NAU-LB	1754	46	167	6.35884	18.3072	1.52558	Up	5.90502e-12	5.49655e-11	K15397|1|0.0|855|aly:ARALYDRAFT_472173|3-ketoacyl-CoA synthase [EC:2.3.1.-]	GO:0044464//cell part	GO:0016747//transferase activity, transferring acyl groups other than amino-acyl groups	GO:0007275//multicellular organismal development;GO:0006631//fatty acid metabolic process	gi|297844920|ref|XP_002890341.1|/0/hypothetical protein ARALYDRAFT_472173 [Arabidopsis lyrata subsp. lyrata]
CL727.Contig1_NAU-LB	1453	100	361	16.6872	47.7725	1.51744	Up	5.27528e-24	9.00361e-23	K13415|1|4e-40|164|pop:POPTR_562744|protein brassinosteroid insensitive 1 [EC:2.7.10.1 2.7.11.1]	-	GO:0016772//transferase activity, transferring phosphorus-containing groups	GO:0023052//signaling	gi|15230222|ref|NP_189134.1|/1.31805e-168/receptor like protein 39 [Arabidopsis thaliana]
CL422.Contig4_NAU-LB	1462	496	1789	82.2591	235.288	1.51618	Up	2.65404e-112	1.99103e-110	K13348|1|1e-19|95.9|cme:CMS031C|protein Mpv17	GO:0031224//intrinsic to membrane;GO:0009536//plastid	-	-	gi|30695366|ref|NP_564615.3|/5.57152e-175/Peroxisomal membrane 22 kDa (Mpv17/PMP22) family protein [Arabidopsis thaliana]
CL2473.Contig3_NAU-LB	1292	15	54	2.815	8.03651	1.51343	Up	0.000117026	0.000491046	K01757|1|6e-15|80.5|ath:AT1G74020|strictosidine synthase [EC:4.3.3.2]	GO:0043231//intracellular membrane-bounded organelle	GO:0016843	GO:0009820//alkaloid metabolic process	gi|18409339|ref|NP_566951.1|/1.74109e-161/strictosidine synthase [Arabidopsis thaliana]
Unigene8096_NAU-LB	482	17	61	8.55168	24.3343	1.50871	Up	4.27922e-05	0.00019511	-	-	-	-	-
CL2674.Contig1_NAU-LB	1917	29	104	3.66797	10.4315	1.5079	Up	7.90056e-08	5.08139e-07	K08150|1|0.0|1039|aly:ARALYDRAFT_915101|MFS transporter, SP family, solute carrier family 2 (myo-inositol transporter), member 13	GO:0031224//intrinsic to membrane	GO:0016491//oxidoreductase activity;GO:0005365//myo-inositol transmembrane transporter activity	GO:0006810//transport	gi|297804542|ref|XP_002870155.1|/0/ATINT4 [Arabidopsis lyrata subsp. lyrata]
CL2812.Contig1_NAU-LB	1837	128	459	16.8947	48.0441	1.50779	Up	7.7562e-30	1.6264e-28	K07513|1|0.0|775|ath:AT2G33150|acetyl-CoA acyltransferase 1 [EC:2.3.1.16]	GO:0031981//nuclear lumen;GO:0009536//plastid;GO:0042579//microbody;GO:0031090//organelle membrane	GO:0016408	GO:0009694//jasmonic acid metabolic process;GO:0009062//fatty acid catabolic process;GO:0009657//plastid organization;GO:0009738//abscisic acid mediated signaling pathway;GO:0006950//response to stress	gi|312283157|dbj|BAJ34444.1|/0/unnamed protein product [Thellungiella halophila]
gnl|UG|Rsa#S42005312	729	36	129	11.9736	34.025	1.50674	Up	2.15762e-09	1.62322e-08	-	-	-	-	gi|18395081|ref|NP_564160.1|/1.1439e-50/uncharacterized protein [Arabidopsis thaliana]
Unigene20510_NAU-LB	1125	28	100	6.03469	17.0916	1.50194	Up	1.53524e-07	9.60309e-07	-	GO:0005911//cell-cell junction	-	-	gi|297817772|ref|XP_002876769.1|/1.60871e-128/hypothetical protein ARALYDRAFT_484082 [Arabidopsis lyrata subsp. lyrata]
Unigene16748_NAU-LB	1437	30	107	5.0619	14.3174	1.50001	Up	5.7448e-08	3.75747e-07	K08286|1|7e-110|395|aly:ARALYDRAFT_494187|protein-serine/threonine kinase [EC:2.7.11.-];K08282|5|8e-79|292|ath:AT3G45780|non-specific serine/threonine protein kinase [EC:2.7.11.1]	GO:0009536//plastid	GO:0004672//protein kinase activity;GO:0032559	GO:0006464//cellular protein modification process	gi|30692190|ref|NP_190047.2|/0/protein kinase family protein [Arabidopsis thaliana]
Unigene20619_NAU-LB	1641	32	114	4.72815	13.3577	1.49833	Up	2.15368e-08	1.47421e-07	K00815|1|0.0|719|ath:AT5G53970|tyrosine aminotransferase [EC:2.6.1.5]	-	GO:0070547;GO:0048037//cofactor binding;GO:0016846//carbon-sulfur lyase activity	GO:0008652//cellular amino acid biosynthetic process;GO:0042360//vitamin E metabolic process	gi|15239521|ref|NP_200208.1|/0/tyrosine aminotransferase [Arabidopsis thaliana]
Unigene5784_NAU-LB	1437	25	89	4.21825	11.9088	1.49731	Up	8.00596e-07	4.62912e-06	-	GO:0031090//organelle membrane	GO:0046872//metal ion binding;GO:0016791//phosphatase activity	GO:0005985//sucrose metabolic process;GO:0006796//phosphate-containing compound metabolic process	gi|75163434|sp|Q93XN8.1|SPP3B_ARATH/0/RecName: Full=Probable sucrose-phosphatase 3b; Short=AtSPP3b
Unigene22103_NAU-LB	515	17	60	8.00371	22.4017	1.48487	Up	6.067e-05	0.000267665	-	-	GO:0005488//binding;GO:0016772//transferase activity, transferring phosphorus-containing groups	-	gi|51969016|dbj|BAD43200.1|/9.77885e-13/KI domain interacting kinase 1 -like protein [Arabidopsis thaliana]
CL7010.Contig2_NAU-LB	1517	181	638	28.9296	80.867	1.483	Up	6.61148e-40	1.82849e-38	K00924|1|4e-85|313|osa:4342410|[EC:2.7.1.-];K07198|4|2e-62|238|zma:100192108|5'-AMP-activated protein kinase, catalytic alpha subunit [EC:2.7.11.11]	-	GO:0004672//protein kinase activity;GO:0000166//nucleotide binding	GO:0009987//cellular process	gi|297831018|ref|XP_002883391.1|/5.15013e-155/cbl-interacting protein kinase 7 [Arabidopsis lyrata subsp. lyrata]
CL5557.Contig3_NAU-LB	3792	25	88	1.59853	4.46221	1.48101	Up	1.12958e-06	6.35868e-06	K00924|1|8e-127|453|aly:ARALYDRAFT_473063|[EC:2.7.1.-];K13420|3|1e-124|446|pop:POPTR_1075175|LRR receptor-like serine/threonine-protein kinase FLS2 [EC:2.7.11.1]	GO:0016020//membrane	GO:0004672//protein kinase activity;GO:0000166//nucleotide binding	GO:0009987//cellular process;GO:0008152//metabolic process	gi|186511602|ref|NP_849538.2|/0/Leucine-rich repeat-containing protein [Arabidopsis thaliana]
Unigene6698_NAU-LB	1111	29	102	6.32897	17.6532	1.47988	Up	1.57117e-07	9.82337e-07	-	GO:0044464//cell part	GO:0022891//substrate-specific transmembrane transporter activity	GO:0006810//transport	gi|297807051|ref|XP_002871409.1|/3.87146e-151/hypothetical protein ARALYDRAFT_908976 [Arabidopsis lyrata subsp. lyrata]
Unigene20568_NAU-LB	398	35	123	21.3223	59.4235	1.47867	Up	8.27664e-09	5.88426e-08	K03676|1|5e-14|74.3|bdi:100821530|glutaredoxin 3	GO:0044464//cell part	GO:0015036//disulfide oxidoreductase activity	GO:0019725//cellular homeostasis	gi|297826471|ref|XP_002881118.1|/6.22664e-32/glutaredoxin family protein [Arabidopsis lyrata subsp. lyrata]
gi|166098971|gb|FD529564.1|FD529564	812	76	267	22.6938	63.2254	1.47821	Up	1.62418e-17	2.11147e-16	-	GO:0030312//external encapsulating structure	-	GO:0006970//response to osmotic stress	gi|297798494|ref|XP_002867131.1|/6.74706e-98/cyclase family protein [Arabidopsis lyrata subsp. lyrata]
CL8055.Contig2_NAU-LB	1004	55	192	13.2825	36.7708	1.46904	Up	6.87918e-13	6.80439e-12	-	GO:0016020//membrane;GO:0009536//plastid	GO:0004672//protein kinase activity;GO:0000166//nucleotide binding	GO:0006952//defense response;GO:0010033//response to organic substance;GO:0008219//cell death	gi|13506745|gb|AAK28315.1|AF224705_1/4.44048e-79/receptor-like protein kinase 4 [Arabidopsis thaliana]
CL1862.Contig1_NAU-LB	1395	347	1211	60.3121	166.919	1.46863	Up	3.4613e-73	1.71031e-71	K01369|1|0.0|662|aly:ARALYDRAFT_491400|legumain [EC:3.4.22.34]	GO:0005773//vacuole	GO:0004175//endopeptidase activity	GO:0016485//protein processing	gi|312281859|dbj|BAJ33795.1|/0/unnamed protein product [Thellungiella halophila]
Unigene21014_NAU-LB	865	64	223	17.9396	49.5707	1.46634	Up	1.04378e-14	1.15491e-13	K03686|1|1e-10|65.1|gmx:100811006|molecular chaperone DnaJ;K09531|5|3e-10|63.9|vcn:VOLCADRAFT_95730|DnaJ homolog subfamily C member 11	GO:0009536//plastid	GO:0005515//protein binding	GO:0044267//cellular protein metabolic process;GO:0050896//response to stimulus	gi|15233838|ref|NP_192673.1|/7.4925e-114/chaperone DnaJ-domain containing protein [Arabidopsis thaliana]
CL1440.Contig2_NAU-LB	919	31	108	8.17891	22.5967	1.46613	Up	8.26212e-08	5.30411e-07	-	-	GO:0016740//transferase activity	GO:0006950//response to stress;GO:0006520//cellular amino acid metabolic process	gi|15234763|ref|NP_194782.1|/2.24996e-119/class I glutamine amidotransferase domain-containing protein [Arabidopsis thaliana]
CL3497.Contig1_NAU-LB	828	48	167	14.056	38.7813	1.46418	Up	2.43136e-11	2.14807e-10	K07385|1|2e-103|373|aly:ARALYDRAFT_664366|1,8-cineole synthase [EC:4.2.3.-];K12467|4|2e-101|367|aly:ARALYDRAFT_667687|myrcene/ocimene synthase [EC:4.2.3.15]	-	GO:0035251//UDP-glucosyltransferase activity;GO:0010334//sesquiterpene synthase activity;GO:0046872//metal ion binding;GO:0009975//cyclase activity;GO:0019203//carbohydrate phosphatase activity	GO:0051707//response to other organism;GO:0009719;GO:0043692;GO:0005991//trehalose metabolic process;GO:0006714//sesquiterpenoid metabolic process;GO:0006950//response to stress;GO:0016098//monoterpenoid metabolic process	gi|297814802|ref|XP_002875284.1|/2.73709e-102/predicted protein [Arabidopsis lyrata subsp. lyrata]
CL8085.Contig1_NAU-LB	610	43	149	17.0918	46.967	1.45834	Up	3.27598e-10	2.63163e-09	K13430|1|2e-13|73.9|aly:ARALYDRAFT_909268|serine/threonine-protein kinase PBS1 [EC:2.7.11.1];K04733|2|2e-13|73.9|smo:SELMODRAFT_33807|interleukin-1 receptor-associated kinase 4 [EC:2.7.11.1]	GO:0043231//intracellular membrane-bounded organelle	GO:0004672//protein kinase activity;GO:0032559	GO:0042742//defense response to bacterium;GO:0006464//cellular protein modification process	gi|240255784|ref|NP_192890.4|/5.35697e-55/putative cysteine-rich receptor-like protein kinase 35 [Arabidopsis thaliana]
Unigene3870_NAU-LB	1210	26	90	5.21	14.3019	1.45685	Up	1.14951e-06	6.46894e-06	-	-	-	-	gi|297790788|ref|XP_002863279.1|/8.53126e-139/hypothetical protein ARALYDRAFT_497092 [Arabidopsis lyrata subsp. lyrata]
Unigene8095_NAU-LB	1507	322	1114	51.8074	142.137	1.45605	Up	1.23033e-66	5.53786e-65	K00517|1|2e-127|454|osa:4349111|[EC:1.14.-.-];K15399|3|3e-90|330|aly:ARALYDRAFT_478392|cytochrome P450, family 77, subfamily A, polypeptide 6 [EC:1.14.-.-]	GO:0043231//intracellular membrane-bounded organelle	GO:0016712//oxidoreductase activity, acting on paired donors, with incorporation or reduction of molecular oxygen, reduced flavin or flavoprotein as one donor, and incorporation of one atom of oxygen;GO:0005506//iron ion binding	GO:0008152//metabolic process	gi|297837797|ref|XP_002886780.1|/0/CYP89A5 [Arabidopsis lyrata subsp. lyrata]
Unigene20933_NAU-LB	703	22	76	7.58782	20.7871	1.45393	Up	8.34944e-06	4.23753e-05	-	-	-	-	-
CL2111.Contig1_NAU-LB	1473	48	164	7.90111	21.4081	1.43803	Up	6.63184e-11	5.66033e-10	K03021|1|2e-12|72.0|ota:Ot01g06000|DNA-directed RNA polymerase III subunit RPC2 [EC:2.7.7.6]	GO:0016020//membrane	-	-	gi|297804710|ref|XP_002870239.1|/0/hypothetical protein ARALYDRAFT_493346 [Arabidopsis lyrata subsp. lyrata]
gi|167489786|gb|FD971796.1|FD971796	739	65	222	21.3264	57.7623	1.43749	Up	2.88418e-14	3.11197e-13	-	GO:0044464//cell part	GO:0046914//transition metal ion binding;GO:0003676//nucleic acid binding;GO:0016866//intramolecular transferase activity	GO:0009451//RNA modification	gi|2497890|sp|P56172.1|MT25_BRAJU/6.99245e-19/RecName: Full=Metallothionein-like protein type 2, MT2-28
gnl|UG|Rsa#S41979470	874	22	75	6.10324	16.5001	1.43482	Up	1.17205e-05	5.82554e-05	-	-	-	-	gi|297816960|ref|XP_002876363.1|/1.2273e-71/hypothetical protein ARALYDRAFT_907078 [Arabidopsis lyrata subsp. lyrata]
gi|158656693|gb|EX766584.1|EX766584	806	32	109	9.62641	26.0032	1.43362	Up	1.1735e-07	7.42729e-07	K13229|1|5e-42|169|zma:541977|2,4-dihydroxy-1,4-benzoxazin-3-one-glucoside dioxygenase [EC:1.14.20.2];K06892|2|5e-31|132|pop:POPTR_550478|;K05278|3|1e-27|121|vvi:100249002|flavonol synthase [EC:1.14.11.23]	-	GO:0016641//oxidoreductase activity, acting on the CH-NH2 group of donors, oxygen as acceptor;GO:0016706//oxidoreductase activity, acting on paired donors, with incorporation or reduction of molecular oxygen, 2-oxoglutarate as one donor, and incorporation of one atom each of oxygen into both donors	GO:0008152//metabolic process	gi|297843238|ref|XP_002889500.1|/8.13551e-96/hypothetical protein ARALYDRAFT_470412 [Arabidopsis lyrata subsp. lyrata]
CL7552.Contig2_NAU-LB	635	89	302	33.9833	91.447	1.42811	Up	1.01566e-18	1.40064e-17	-	-	-	-	gi|32395571|gb|AAP37967.1|/1.18769e-39/seed specific protein Bn15D1B [Brassica napus]
CL4301.Contig2_NAU-LB	1904	79	268	10.0603	27.0647	1.42775	Up	9.0253e-17	1.12718e-15	K14638|1|1e-129|462|mtr:MTR_4g015080|solute carrier family 15 (peptide/histidine transporter), member 3/4	GO:0044464//cell part	-	GO:0015833//peptide transport	gi|75266596|sp|Q9SX20.1|PTR18_ARATH/0/RecName: Full=Probable nitrite transporter At1g68570
Unigene8042_NAU-LB	711	30	101	10.2306	27.3142	1.41676	Up	4.37788e-07	2.58896e-06	K08176|1|2e-98|356|aly:ARALYDRAFT_476800|MFS transporter, PHS family, inorganic phosphate transporter	GO:0031224//intrinsic to membrane	GO:0015103//inorganic anion transmembrane transporter activity	GO:0006810//transport	gi|297842403|ref|XP_002889083.1|/2.03958e-97/hypothetical protein ARALYDRAFT_476800 [Arabidopsis lyrata subsp. lyrata]
CL7247.Contig2_NAU-LB	1061	50	168	11.4263	30.446	1.4139	Up	6.76714e-11	5.77492e-10	K00924|1|4e-156|548|aly:ARALYDRAFT_489442|[EC:2.7.1.-];K08286|4|2e-62|238|ath:AT4G28490|protein-serine/threonine kinase [EC:2.7.11.-]	GO:0031224//intrinsic to membrane	GO:0016491//oxidoreductase activity;GO:0004674//protein serine/threonine kinase activity;GO:0032559	GO:0006464//cellular protein modification process	gi|297808613|ref|XP_002872190.1|/5.3696e-155/leucine-rich repeat family protein [Arabidopsis lyrata subsp. lyrata]
gi|161547529|gb|EY919833.1|EY919833	791	149	500	45.673	121.543	1.41205	Up	1.6099e-29	3.34551e-28	K13448|1|7e-77|285|ath:AT3G51920|calcium-binding protein CML;K02183|3|1e-38|157|ath:AT1G66410|calmodulin	GO:0043231//intracellular membrane-bounded organelle;GO:0044444//cytoplasmic part;GO:0016020//membrane	GO:0046872//metal ion binding;GO:0060089;GO:0016491//oxidoreductase activity	GO:0006073//cellular glucan metabolic process;GO:0009725//response to hormone stimulus;GO:0019932//second-messenger-mediated signaling;GO:0009908//flower development;GO:0009593//detection of chemical stimulus;GO:0006970//response to osmotic stress;GO:0009605//response to external stimulus	gi|297819898|ref|XP_002877832.1|/9.13034e-76/hypothetical protein ARALYDRAFT_906546 [Arabidopsis lyrata subsp. lyrata]
Unigene15409_NAU-LB	1104	94	312	20.6447	54.3402	1.39625	Up	1.05824e-18	1.45827e-17	K08176|1|6e-137|485|ath:AT1G76430|MFS transporter, PHS family, inorganic phosphate transporter	GO:0031224//intrinsic to membrane	GO:0015103//inorganic anion transmembrane transporter activity	GO:0006810//transport	gi|75313014|sp|Q9S735.1|PHT19_ARATH/7.74064e-136/RecName: Full=Probable inorganic phosphate transporter 1-9; Short=AtPht1;9; AltName: Full=H(+)/Pi cotransporter
Unigene11613_NAU-LB	816	44572	147731	13244.1	34811.1	1.3942	Up	0	0	-	-	-	-	gi|6009633|dbj|BAA84998.1|/5.52147e-07/DA-3 [Trifolium repens]
CL705.Contig1_NAU-LB	606	212	698	84.8228	221.472	1.3846	Up	1.92415e-39	5.26128e-38	-	-	GO:0046914//transition metal ion binding	GO:0030003//cellular cation homeostasis	gi|18958241|dbj|BAB85599.1|/1.17585e-22/metallothionein type 3 [Brassica juncea]
gi|332788863|gb|FY441441.1|FY441441	770	22	72	6.92758	17.9795	1.37593	Up	3.1888e-05	0.000148126	-	GO:0016020//membrane	-	-	gi|297811315|ref|XP_002873541.1|/3.12216e-33/hypothetical protein ARALYDRAFT_488039 [Arabidopsis lyrata subsp. lyrata]
CL3028.Contig1_NAU-LB	2438	531	1733	52.8093	136.679	1.37193	Up	4.46908e-94	2.8135e-92	-	GO:0043231//intracellular membrane-bounded organelle	GO:0016462//pyrophosphatase activity;GO:0032559	-	gi|297829570|ref|XP_002882667.1|/0/hypothetical protein ARALYDRAFT_897221 [Arabidopsis lyrata subsp. lyrata]
gi|167506798|gb|FD989289.1|FD989289	788	21	68	6.46164	16.5928	1.36058	Up	6.18494e-05	0.000272739	-	GO:0009534//chloroplast thylakoid	-	-	gi|312282351|dbj|BAJ34041.1|/1.75699e-95/unnamed protein product [Thellungiella halophila]
Unigene14313_NAU-LB	2247	421	1361	45.4285	116.464	1.35821	Up	3.5336e-73	1.74449e-71	-	GO:0009536//plastid	-	-	gi|357436101|ref|XP_003588326.1|/1.11533e-141/ATP synthase subunit alpha [Medicago truncatula]
Unigene5718_NAU-LB	1022	84	271	19.9286	50.9864	1.35527	Up	8.82654e-16	1.03975e-14	-	-	-	-	gi|297798450|ref|XP_002867109.1|/2.0092e-34/hypothetical protein ARALYDRAFT_491192 [Arabidopsis lyrata subsp. lyrata]
Unigene18941_NAU-LB	1351	217	696	38.9452	99.0581	1.34683	Up	8.60238e-38	2.25671e-36	K14709|1|7e-138|488|aly:ARALYDRAFT_682652|solute carrier family 39 (zinc transporter), member 1/2/3	GO:0044464//cell part	GO:0008324//cation transmembrane transporter activity	GO:0006812//cation transport	gi|18405597|ref|NP_564703.1|/9.27751e-137/zinc transporter 11 [Arabidopsis thaliana]
gnl|UG|Rsa#S43018457	652	22	70	8.18134	20.6437	1.33529	Up	6.12584e-05	0.000270154	K11982|1|7e-08|55.5|vvi:100262515|E3 ubiquitin-protein ligase RNF115/126 [EC:6.3.2.19]	-	GO:0005488//binding;GO:0019787//small conjugating protein ligase activity	GO:0032446//protein modification by small protein conjugation;GO:0009743//response to carbohydrate stimulus;GO:0006714//sesquiterpenoid metabolic process;GO:0006970//response to osmotic stress;GO:0009738//abscisic acid mediated signaling pathway;GO:0080134//regulation of response to stress	gi|51316550|sp|Q9ZU51.2|RHA2B_ARATH/5.54092e-40/RecName: Full=Probable E3 ubiquitin-protein ligase RHA2B; AltName: Full=RING-H2 zinc finger protein RHA2b
Unigene4227_NAU-LB	951	66	210	16.8272	42.4595	1.33529	Up	2.67112e-12	2.54386e-11	-	-	-	-	-
Unigene17592_NAU-LB	350	48	152	33.2524	83.5048	1.3284	Up	3.25038e-09	2.40818e-08	K03781|1|4e-62|233|ath:AT1G20630|catalase [EC:1.11.1.6]	GO:0005840//ribosome;GO:0030312//external encapsulating structure;GO:0000325//plant-type vacuole;GO:0009526//plastid envelope;GO:0042579//microbody;GO:0031090//organelle membrane	GO:0005275//amine transmembrane transporter activity;GO:0004601//peroxidase activity;GO:0005506//iron ion binding	GO:0010038//response to metal ion;GO:0009725//response to hormone stimulus;GO:0000302//response to reactive oxygen species;GO:0009267//cellular response to starvation;GO:0009416//response to light stimulus;GO:0019725//cellular homeostasis;GO:0042743//hydrogen peroxide metabolic process;GO:0015837//amine transport	gi|8778617|gb|AAF79625.1|AC027665_26/6.3178e-61/F5M15.5 [Arabidopsis thaliana]
Unigene12697_NAU-LB	2078	61	193	7.1176	17.8586	1.32716	Up	2.53052e-11	2.23355e-10	-	-	-	-	gi|18396859|ref|NP_566224.1|/0/uncharacterized protein [Arabidopsis thaliana]
Unigene19086_NAU-LB	1029	27	85	6.36206	15.8833	1.31994	Up	1.15261e-05	5.73661e-05	K12900|1|2e-24|111|rcu:RCOM_0036490|FUS-interacting serine-arginine-rich protein 1;K12891|4|5e-07|53.5|vvi:100242306|splicing factor, arginine/serine-rich 2	GO:0043231//intracellular membrane-bounded organelle	-	-	gi|297722159|ref|NP_001173443.1|/2.48468e-24/Os03g0374575 [Oryza sativa Japonica Group]
CL5097.Contig3_NAU-LB	1477	111	345	18.2218	44.9133	1.30147	Up	1.32981e-18	1.82211e-17	K06694|1|3e-14|78.2|sbi:SORBI_01g007540|26S proteasome non-ATPase regulatory subunit 10	GO:0005777//peroxisome;GO:0005618//cell wall;GO:0016020//membrane	GO:0046872//metal ion binding;GO:0005543//phospholipid binding;GO:0005504//fatty acid binding	GO:0010876//lipid localization;GO:0006950//response to stress;GO:0044238//primary metabolic process;GO:0010038//response to metal ion	gi|15234270|ref|NP_194507.1|/2.80901e-158/acyl-CoA binding protein 2 [Arabidopsis thaliana]
Unigene20478_NAU-LB	887	75	233	20.5016	50.509	1.30081	Up	5.05826e-13	5.04456e-12	-	-	-	-	-
CL1606.Contig2_NAU-LB	1864	86	267	11.1867	27.5424	1.29987	Up	1.05968e-14	1.17134e-13	-	GO:0016020//membrane	GO:0015197//peptide transporter activity;GO:0015603	GO:0022414//reproductive process;GO:0006810//transport;GO:0009791//post-embryonic development;GO:0051707//response to other organism	gi|312282711|dbj|BAJ34221.1|/0/unnamed protein product [Thellungiella halophila]
Unigene21150_NAU-LB	2434	20	62	1.99232	4.89787	1.29771	Up	0.00022863	0.000919299	-	GO:0000325//plant-type vacuole	GO:0043169//cation binding;GO:0004091//carboxylesterase activity	GO:0009581//detection of external stimulus;GO:0009657//plastid organization;GO:0009630//gravitropism	gi|297851926|ref|XP_002893844.1|/0/hypothetical protein ARALYDRAFT_473628 [Arabidopsis lyrata subsp. lyrata]
CL2964.Contig2_NAU-LB	401	23	71	13.907	34.0447	1.29162	Up	8.30018e-05	0.000361938	-	-	-	-	-
gi|167504379|gb|FD986615.1|FD986615	504	59	182	28.3838	69.4348	1.29059	Up	2.30078e-10	1.87699e-09	K02694|1|8e-49|190|aly:ARALYDRAFT_473640|photosystem I subunit III	GO:0009526//plastid envelope;GO:0009570//chloroplast stroma;GO:0009534//chloroplast thylakoid;GO:0009522//photosystem I	-	GO:0044237//cellular metabolic process	gi|15221681|ref|NP_174418.1|/8.88656e-48/photosystem I reaction center subunit III [Arabidopsis thaliana]
gi|154181781|gb|EV551121.1|EV551121	679	27	83	9.64147	23.5041	1.28559	Up	2.17012e-05	0.000103942	K08341|1|3e-53|206|rcu:RCOM_0904310|GABA(A) receptor-associated protein (autophagy-related protein 8)	GO:0044437	GO:0008641//small protein activating enzyme activity;GO:0019783//small conjugating protein-specific protease activity;GO:0016879//ligase activity, forming carbon-nitrogen bonds;GO:0004871//signal transducer activity;GO:0015631//tubulin binding	GO:0044248//cellular catabolic process	gi|297813843|ref|XP_002874805.1|/1.29862e-58/hypothetical protein ARALYDRAFT_911720 [Arabidopsis lyrata subsp. lyrata]
CL3152.Contig2_NAU-LB	383	75	230	47.4801	115.469	1.28211	Up	1.27298e-12	1.23886e-11	-	-	-	-	-
gi|167474460|gb|FD958962.1|FD958962	669	45	138	16.3093	39.6633	1.28211	Up	4.1354e-08	2.74389e-07	K09422|1|7e-70|261|aly:ARALYDRAFT_894284|myb proto-oncogene protein, plant	GO:0043231//intracellular membrane-bounded organelle;GO:0016021//integral to membrane	GO:0003676//nucleic acid binding;GO:0001071//nucleic acid binding transcription factor activity;GO:0016791//phosphatase activity	GO:0009725//response to hormone stimulus;GO:0009718//anthocyanin-containing compound biosynthetic process;GO:0006801//superoxide metabolic process;GO:0019637//organophosphate metabolic process;GO:0006970//response to osmotic stress;GO:0006351//transcription, DNA-dependent;GO:0010182//sugar mediated signaling pathway	gi|311223156|gb|ADP76651.1|/1.6003e-77/MYB2 [Brassica oleracea var. botrytis]
Unigene19701_NAU-LB	1245	216	661	42.0663	102.086	1.27906	Up	2.28932e-33	5.35836e-32	-	-	GO:0004620//phospholipase activity;GO:0042578//phosphoric ester hydrolase activity	GO:0044238//primary metabolic process;GO:0007165//signal transduction	gi|297802468|ref|XP_002869118.1|/1.26918e-169/hypothetical protein ARALYDRAFT_912893 [Arabidopsis lyrata subsp. lyrata]
Unigene20580_NAU-LB	212	36	110	41.1733	99.7684	1.27687	Up	1.09087e-06	6.15386e-06	-	-	-	-	-
Unigene7475_NAU-LB	1235	37	113	7.26414	17.5933	1.27616	Up	7.83892e-07	4.533e-06	-	GO:0009536//plastid	GO:0003824//catalytic activity	GO:0010035//response to inorganic substance	gi|22329127|ref|NP_195080.2|/1.25883e-161/metallo-beta-lactamase family protein [Arabidopsis thaliana]
gi|332795393|gb|FY449298.1|FY449298	854	40	122	11.3567	27.4687	1.27425	Up	2.91378e-07	1.76789e-06	K13811|1|3e-146|515|aly:ARALYDRAFT_479799|3'-phosphoadenosine 5'-phosphosulfate synthase [EC:2.7.7.4 2.7.1.25]	GO:0016020//membrane;GO:0009536//plastid	GO:0004779//sulfate adenylyltransferase activity	GO:0006790//sulfur compound metabolic process;GO:0010038//response to metal ion	gi|4033365|emb|CAA11417.1|/2.11543e-153/ATP sulfurylase [Brassica juncea]
Unigene9726_NAU-LB	1674	61	186	8.83535	21.3645	1.27386	Up	2.21734e-10	1.81078e-09	K00451|1|0.0|900|aly:ARALYDRAFT_918517|homogentisate 1,2-dioxygenase [EC:1.13.11.5]	-	GO:0016702//oxidoreductase activity, acting on single donors with incorporation of molecular oxygen, incorporation of two atoms of oxygen	GO:0006558//L-phenylalanine metabolic process;GO:0006570//tyrosine metabolic process	gi|21594040|gb|AAM65958.1|/0/homogentisate 1,2-dioxygenase [Arabidopsis thaliana]
Unigene5513_NAU-LB	807	65	198	19.5294	47.1767	1.27243	Up	6.0315e-11	5.16379e-10	-	-	-	-	-
Unigene19707_NAU-LB	1351	22	67	3.94836	9.53577	1.2721	Up	0.000159412	0.000661114	K06892|1|2e-159|560|aly:ARALYDRAFT_473661|	-	GO:0046914//transition metal ion binding;GO:0016706//oxidoreductase activity, acting on paired donors, with incorporation or reduction of molecular oxygen, 2-oxoglutarate as one donor, and incorporation of one atom each of oxygen into both donors	GO:0009820//alkaloid metabolic process;GO:0044249//cellular biosynthetic process	gi|297846564|ref|XP_002891163.1|/2.50899e-158/oxidoreductase [Arabidopsis lyrata subsp. lyrata]
CL7608.Contig1_NAU-LB	1016	98	297	23.3874	56.2081	1.26505	Up	1.37114e-15	1.59724e-14	K12843|1|3e-16|84.3|vvi:100248403|U4/U6 small nuclear ribonucleoprotein PRP3;K05681|2|6e-13|73.2|cme:CMS467C|ATP-binding cassette, subfamily G (WHITE), member 2	GO:0044464//cell part	GO:0017111//nucleoside-triphosphatase activity;GO:0032559	GO:0009207	gi|297810759|ref|XP_002873263.1|/2.00797e-119/abc transporter family protein [Arabidopsis lyrata subsp. lyrata]
gnl|UG|Rsa#S41997035	834	26	78	7.55887	17.9831	1.2504	Up	5.65426e-05	0.000251291	-	GO:0044464//cell part	-	GO:0009725//response to hormone stimulus;GO:0006970//response to osmotic stress	gi|34100944|gb|AAQ57584.1|/1.08544e-114/BURP domain-containing protein [Brassica napus]
CL8906.Contig1_NAU-LB	2026	33	99	3.94933	9.39576	1.2504	Up	5.46e-06	2.83183e-05	K01568|1|0.0|1171|aly:ARALYDRAFT_495579|pyruvate decarboxylase [EC:4.1.1.1]	GO:0044464//cell part	GO:0046872//metal ion binding;GO:0016831//carboxy-lyase activity;GO:0019842//vitamin binding	GO:0006950//response to stress	gi|297796369|ref|XP_002866069.1|/0/pyruvate decarboxylase-2 [Arabidopsis lyrata subsp. lyrata]
CL7483.Contig1_NAU-LB	1078	84	250	18.8934	44.592	1.2389	Up	5.70854e-13	5.67475e-12	K00224|1|1e-136|484|aly:ARALYDRAFT_476671|[EC:1.3.1.-];K13081|4|3e-57|220|pop:POPTR_835080|leucoanthocyanidin reductase [EC:1.17.1.3]	GO:0016020//membrane	GO:0016491//oxidoreductase activity	GO:0006950//response to stress;GO:0010038//response to metal ion	gi|312283119|dbj|BAJ34425.1|/1.40809e-142/unnamed protein product [Thellungiella halophila]
Unigene21236_NAU-LB	535	37	110	16.7686	39.5344	1.23734	Up	1.96499e-06	1.07226e-05	-	-	-	-	gi|297793285|ref|XP_002864527.1|/6.12007e-16/hypothetical protein ARALYDRAFT_918955 [Arabidopsis lyrata subsp. lyrata]
Unigene19928_NAU-LB	591	31	92	12.7181	29.932	1.2348	Up	1.44193e-05	7.05409e-05	K06995|1|9e-22|101|smo:SELMODRAFT_143029|	-	-	-	gi|42566391|ref|NP_192767.2|/1.11775e-38/cupin domain-containing protein [Arabidopsis thaliana]
Unigene553_NAU-LB	593	29	86	11.8575	27.8856	1.23372	Up	2.81182e-05	0.000131571	-	-	-	-	-
Unigene19500_NAU-LB	686	140	415	49.4827	116.322	1.23312	Up	1.97481e-20	2.94943e-19	-	-	-	-	gi|297822431|ref|XP_002879098.1|/4.73976e-64/hypothetical protein ARALYDRAFT_481665 [Arabidopsis lyrata subsp. lyrata]
CL1418.Contig2_NAU-LB	1203	25	74	5.03876	11.8278	1.23103	Up	0.000107646	0.000460479	-	GO:0043231//intracellular membrane-bounded organelle;GO:0005576//extracellular region;GO:0030312//external encapsulating structure	GO:0043167//ion binding;GO:0008422//beta-glucosidase activity	GO:0009814//defense response, incompatible interaction;GO:0044238//primary metabolic process	gi|195536974|dbj|BAG68207.1|/1.44274e-130/beta-1,3-glucanase [Brassica rapa subsp. chinensis]
gi|161547667|gb|EY919881.1|EY919881	843	23	68	6.6153	15.5102	1.22934	Up	0.000211478	0.000859032	-	-	GO:0004518//nuclease activity;GO:0005488//binding	-	gi|297853378|ref|XP_002894570.1|/1.61182e-105/HNH endonuclease domain-containing protein [Arabidopsis lyrata subsp. lyrata]
CL5667.Contig2_NAU-LB	918	28	82	7.39545	17.1754	1.21563	Up	5.32496e-05	0.000238544	K06689|1|3e-84|309|aly:ARALYDRAFT_478172|ubiquitin-conjugating enzyme E2 D/E [EC:6.3.2.19]	-	GO:0019787//small conjugating protein ligase activity;GO:0032559	GO:0019941//modification-dependent protein catabolic process;GO:0032446//protein modification by small protein conjugation	gi|18398206|ref|NP_566331.1|/4.40764e-83/ubiquitin-conjugating enzyme E2 11 [Arabidopsis thaliana]
CL6688.Contig1_NAU-LB	695	39	114	13.606	31.5396	1.21293	Up	1.85102e-06	1.01747e-05	K08341|1|4e-62|235|aly:ARALYDRAFT_915092|GABA(A) receptor-associated protein (autophagy-related protein 8)	-	GO:0015631//tubulin binding;GO:0004871//signal transducer activity	-	gi|297800486|ref|XP_002868127.1|/4.97573e-61/hypothetical protein ARALYDRAFT_915092 [Arabidopsis lyrata subsp. lyrata]
Unigene20226_NAU-LB	1585	163	474	24.9349	57.5023	1.20545	Up	2.28252e-22	3.68311e-21	-	-	GO:0046872//metal ion binding	-	gi|297801962|ref|XP_002868865.1|/3.27073e-176/calcium-binding EF hand family protein [Arabidopsis lyrata subsp. lyrata]
CL55.Contig2_NAU-LB	2151	31	90	3.49438	8.04523	1.20309	Up	2.63754e-05	0.000124032	K10268|1|1e-44|179|sbi:SORBI_05g025540|F-box and leucine-rich repeat protein 2/20	GO:0044464//cell part	-	GO:0019941//modification-dependent protein catabolic process	gi|297806035|ref|XP_002870901.1|/0/F-box family protein [Arabidopsis lyrata subsp. lyrata]
CL9521.Contig1_NAU-LB	1353	112	325	20.071	46.1872	1.20238	Up	9.49354e-16	1.1169e-14	-	GO:0031224//intrinsic to membrane	GO:0015205//nucleobase transmembrane transporter activity	GO:0015851//nucleobase transport	gi|297821705|ref|XP_002878735.1|/2.77401e-157/ATPUP5 [Arabidopsis lyrata subsp. lyrata]
Unigene12085_NAU-LB	1785	146	423	19.8319	45.5657	1.20013	Up	5.36744e-20	7.8436e-19	K01114|1|0.0|942|ath:AT1G07230|phospholipase C [EC:3.1.4.3]	-	GO:0016787//hydrolase activity	-	gi|186478224|ref|NP_172203.2|/0/phospholipase C [Arabidopsis thaliana]
Unigene14456_NAU-LB	507	46	133	21.9988	50.4405	1.19716	Up	3.3337e-07	2.01169e-06	K13425|1|2e-08|56.2|rcu:RCOM_1616660|WRKY transcription factor 22;K13426|2|9e-08|54.3|rcu:RCOM_1689100|WRKY transcription factor 29	GO:0009536//plastid	GO:0001071//nucleic acid binding transcription factor activity;GO:0003677//DNA binding	GO:0042742//defense response to bacterium;GO:0009743//response to carbohydrate stimulus;GO:0006355//regulation of transcription, DNA-dependent;GO:0010260//organ senescence	gi|126095242|gb|ABN79278.1|/6.68606e-59/WRKY53 transcription factor [Noccaea caerulescens]
Unigene13707_NAU-LB	949	142	410	36.2804	83.0718	1.19517	Up	2.59322e-19	3.67086e-18	-	GO:0043231//intracellular membrane-bounded organelle	GO:0001948//glycoprotein binding	GO:0051707//response to other organism	gi|15235205|ref|NP_193719.1|/1.90264e-76/protein PHLOEM protein 2-LIKE A1 [Arabidopsis thaliana]
CL7697.Contig1_NAU-LB	1472	54	155	8.89478	20.247	1.18667	Up	4.34918e-08	2.87168e-07	K01431|1|0.0|761|ath:AT5G64370|beta-ureidopropionase [EC:3.5.1.6]	GO:0044444//cytoplasmic part	GO:0016811//hydrolase activity, acting on carbon-nitrogen (but not peptide) bonds, in linear amides	GO:0031669//cellular response to nutrient levels;GO:0006208//pyrimidine nucleobase catabolic process	gi|30698009|ref|NP_201242.2|/0/beta-ureidopropionase [Arabidopsis thaliana]
gnl|UG|Rsa#S42007833	800	50	143	15.1541	34.3702	1.18145	Up	1.61181e-07	1.00684e-06	-	-	-	-	-
Unigene15563_NAU-LB	936	30	85	7.77132	17.4614	1.16794	Up	6.66894e-05	0.000293523	-	-	-	-	-
CL7301.Contig1_NAU-LB	1401	40	113	6.92263	15.5087	1.16369	Up	4.32304e-06	2.25774e-05	K14491|1|2e-10|65.9|vvi:100259369|two-component response regulator ARR-B family	-	-	-	gi|297838631|ref|XP_002887197.1|/4.29339e-84/hypothetical protein ARALYDRAFT_475994 [Arabidopsis lyrata subsp. lyrata]
Unigene21954_NAU-LB	1409	74	209	12.7342	28.5214	1.16334	Up	3.65722e-10	2.92899e-09	-	-	-	-	gi|15237211|ref|NP_197093.1|/0/protein trichome birefringence-like 21 [Arabidopsis thaliana]
gnl|UG|Rsa#S43021573	554	36	101	15.7559	35.0548	1.15372	Up	1.62329e-05	7.91346e-05	-	GO:0031224//intrinsic to membrane	-	GO:0006972//hyperosmotic response	gi|15224086|ref|NP_179982.1|/1.10544e-26/Low temperature and salt responsive protein [Arabidopsis thaliana]
Unigene21684_NAU-LB	802	46	129	13.907	30.928	1.1531	Up	1.06886e-06	6.03156e-06	-	-	-	-	-
gi|332773936|gb|FY430410.1|FY430410	671	30	84	10.8405	24.0709	1.15086	Up	8.93664e-05	0.000387594	K01408|1|6e-57|218|aly:ARALYDRAFT_483260|insulysin [EC:3.4.24.56]	-	GO:0046914//transition metal ion binding;GO:0004175//endopeptidase activity	GO:0019538//protein metabolic process	gi|297820542|ref|XP_002878154.1|/1.5048e-59/hypothetical protein ARALYDRAFT_907214 [Arabidopsis lyrata subsp. lyrata]
Unigene22036_NAU-LB	619	39	109	15.2765	33.8588	1.14822	Up	8.03276e-06	4.08277e-05	K14493|1|4e-19|92.8|ppp:PHYPADRAFT_118478|gibberellin receptor GID1 [EC:3.-.-.-]	-	GO:0004871//signal transducer activity;GO:0003824//catalytic activity	-	gi|15240090|ref|NP_196275.1|/6.24605e-67/alpha/beta hydrolase fold-containing protein [Arabidopsis thaliana]
gnl|UG|Rsa#S42038202	764	69	192	21.898	48.3219	1.14188	Up	3.26952e-09	2.42203e-08	K03627|1|4e-72|269|aly:ARALYDRAFT_903640|putative transcription factor	GO:0031981//nuclear lumen	GO:0003712//transcription cofactor activity;GO:0003677//DNA binding	GO:0009725//response to hormone stimulus;GO:0006355//regulation of transcription, DNA-dependent	gi|297824233|ref|XP_002879999.1|/4.85359e-71/ATMBF1A/MBF1A [Arabidopsis lyrata subsp. lyrata]
CL6641.Contig1_NAU-LB	608	55	153	21.9335	48.3865	1.14147	Up	1.32503e-07	8.33982e-07	-	-	-	-	-
gnl|UG|Rsa#S42021190	796	27	75	8.22432	18.1169	1.13937	Up	0.000244114	0.000979858	K00968|1|4e-73|272|ath:AT2G32260|choline-phosphate cytidylyltransferase [EC:2.7.7.15]	-	GO:0070567	GO:0006656//phosphatidylcholine biosynthetic process	gi|1416514|dbj|BAA09644.1|/6.78766e-87/CTP:phosphocholine cytidylyltransferase [Brassica napus]
Unigene19733_NAU-LB	1151	72	200	15.1672	33.4111	1.13937	Up	1.64052e-09	1.24873e-08	-	-	-	-	gi|297810739|ref|XP_002873253.1|/9.42253e-140/NC domain-containing protein [Arabidopsis lyrata subsp. lyrata]
CL7427.Contig2_NAU-LB	1186	31	86	6.33762	13.9428	1.13751	Up	8.55386e-05	0.000372533	K06700|1|1e-93|341|ath:AT3G53970|proteasome inhibitor subunit 1 (PI31)	-	-	-	gi|15232382|ref|NP_190965.1|/1.53085e-92/proteasome inhibitor subunit 1 (PI31) [Arabidopsis thaliana]
CL1030.Contig2_NAU-LB	2225	44	122	4.79482	10.543	1.13674	Up	2.74524e-06	1.47974e-05	K13416|1|1e-49|196|rcu:RCOM_1534760|brassinosteroid insensitive 1-associated receptor kinase 1 [EC:2.7.10.1 2.7.11.1];K13417|3|4e-49|194|aly:ARALYDRAFT_899604|somatic embryogenesis receptor kinase 4 [EC:2.7.10.1 2.7.11.1]	-	GO:0005488//binding;GO:0004672//protein kinase activity	GO:0009987//cellular process	gi|313471496|sp|Q39202.2|RLK1_ARATH/0/RecName: Full=G-type lectin S-receptor-like serine/threonine-protein kinase RLK1; AltName: Full=Receptor-like protein kinase 1; Flags: Precursor
gi|167437375|gb|FD943950.1|FD943950	149	52	144	84.6187	185.829	1.13492	Up	3.52806e-07	2.1269e-06	-	-	-	-	-
CL7771.Contig1_NAU-LB	1796	194	535	26.1906	57.2774	1.12892	Up	9.78046e-23	1.60285e-21	K07300|1|0.0|639|aly:ARALYDRAFT_482825|Ca2+:H+ antiporter	GO:0000325//plant-type vacuole;GO:0031090//organelle membrane	GO:0005488//binding;GO:0015368//calcium:cation antiporter activity	GO:0051707//response to other organism;GO:0010038//response to metal ion;GO:0015672//monovalent inorganic cation transport;GO:0009409//response to cold;GO:0006875//cellular metal ion homeostasis;GO:0006970//response to osmotic stress;GO:0006816//calcium ion transport;GO:0072503;GO:0044237//cellular metabolic process	gi|297827373|ref|XP_002881569.1|/0/hypothetical protein ARALYDRAFT_482825 [Arabidopsis lyrata subsp. lyrata]
Unigene21190_NAU-LB	984	37	102	9.11709	19.9316	1.12841	Up	2.0722e-05	9.95605e-05	K13148|1|4e-09|60.5|vvi:100261060|integrator complex subunit 11 [EC:3.1.27.-];K05283|3|3e-08|57.4|aly:ARALYDRAFT_354960|phosphatidylinositol glycan, class W [EC:2.3.-.-];K15692|4|2e-07|54.7|bdi:100845565|E3 ubiquitin-protein ligase RNF13 [EC:6.3.2.19];K11982|5|6e-07|53.1|gmx:100787523|E3 ubiquitin-protein ligase RNF115/126 [EC:6.3.2.19]	-	GO:0046914//transition metal ion binding	GO:0009725//response to hormone stimulus;GO:0006970//response to osmotic stress;GO:0009743//response to carbohydrate stimulus;GO:0006714//sesquiterpenoid metabolic process	gi|349806866|gb|AEQ19306.1|/1.52644e-76/RING zinc finger protein [Brassica napus]
Unigene11570_NAU-LB	712	74	203	25.2	54.8217	1.12132	Up	1.99313e-09	1.50314e-08	-	-	-	GO:0051179//localization;GO:0006950//response to stress	gi|297833626|ref|XP_002884695.1|/1.88363e-26/hypothetical protein ARALYDRAFT_478179 [Arabidopsis lyrata subsp. lyrata]
gnl|UG|Rsa#S42049326	1126	329	901	70.8446	153.859	1.11888	Up	1.07441e-36	2.73719e-35	K09872|1|4e-144|509|aly:ARALYDRAFT_482707|aquaporin PIP	GO:0031224//intrinsic to membrane;GO:0009536//plastid	GO:0005372//water transmembrane transporter activity;GO:0019899//enzyme binding	GO:0009414//response to water deprivation;GO:0009725//response to hormone stimulus;GO:0055085//transmembrane transport;GO:0042044//fluid transport	gi|3551133|dbj|BAA32778.1|/1.03968e-151/Plasma membrane aquaporin (PAQ2) [Raphanus sativus]
Unigene15538_NAU-LB	818	93	253	27.5663	59.4707	1.10927	Up	3.05534e-11	2.6823e-10	-	-	GO:0004721//phosphoprotein phosphatase activity	GO:0006796//phosphate-containing compound metabolic process;GO:0006464//cellular protein modification process	gi|312282639|dbj|BAJ34185.1|/4.32351e-68/unnamed protein product [Thellungiella halophila]
Unigene12420_NAU-LB	1656	96	261	14.056	30.3051	1.10838	Up	1.5366e-11	1.38217e-10	-	GO:0044464//cell part	-	-	gi|50198791|gb|AAT70429.1|/0/At4g19420 [Arabidopsis thaliana]
CL9907.Contig1_NAU-LB	1417	45	122	7.70002	16.5549	1.10432	Up	4.6126e-06	2.40399e-05	K01915|1|0.0|680|aly:ARALYDRAFT_479266|glutamine synthetase [EC:6.3.1.2]	GO:0005840//ribosome;GO:0009536//plastid;GO:0016020//membrane	GO:0046914//transition metal ion binding;GO:0016211;GO:0032559	GO:0010038//response to metal ion;GO:0071941;GO:0006541//glutamine metabolic process;GO:0042126//nitrate metabolic process	gi|1526562|dbj|BAA04994.1|/0/glutamine synthetase [Raphanus sativus]
Unigene20219_NAU-LB	1517	159	431	25.4133	54.6296	1.1041	Up	5.13582e-18	6.85627e-17	K01176|1|2e-111|400|ppp:PHYPADRAFT_60178|alpha-amylase [EC:3.2.1.1]	-	GO:0046872//metal ion binding;GO:0016160//amylase activity	GO:0044238//primary metabolic process	gi|15222959|ref|NP_177740.1|/0/alpha-amylase-like 2 [Arabidopsis thaliana]
Unigene14146_NAU-LB	306	53	143	41.9956	89.8568	1.09739	Up	7.81188e-07	4.51878e-06	-	-	-	-	-
Unigene788_NAU-LB	1145	142	382	30.0699	64.1496	1.09312	Up	6.65448e-16	7.90419e-15	-	GO:0009536//plastid	-	-	gi|18409704|ref|NP_565005.1|/5.69834e-121/uncharacterized protein [Arabidopsis thaliana]
Unigene4301_NAU-LB	899	45	121	12.1367	25.8799	1.09245	Up	6.09344e-06	3.15008e-05	-	GO:0043234//protein complex;GO:0044431//Golgi apparatus part;GO:0016021//integral to membrane	GO:0046872//metal ion binding	GO:0006605//protein targeting	gi|297804128|ref|XP_002869948.1|/1.07369e-118/hypothetical protein ARALYDRAFT_492857 [Arabidopsis lyrata subsp. lyrata]
Unigene15544_NAU-LB	1524	278	747	44.2292	94.2479	1.09146	Up	1.43692e-29	2.99164e-28	K08999|1|4e-29|127|rcu:RCOM_0783240|hypothetical protein	-	GO:0016788//hydrolase activity, acting on ester bonds;GO:0003676//nucleic acid binding	GO:0006952//defense response;GO:0006281//DNA repair	gi|297850356|ref|XP_002893059.1|/1.45618e-165/wound-responsive family protein [Arabidopsis lyrata subsp. lyrata]
Unigene13606_NAU-LB	951	40	107	10.1983	21.6341	1.08498	Up	2.37534e-05	0.000112568	K03880|1|8e-50|195|osa:6450168|NADH-ubiquinone oxidoreductase chain 3 [EC:1.6.5.3]	GO:0030529//ribonucleoprotein complex;GO:0009536//plastid	GO:0003723//RNA binding;GO:0005198//structural molecule activity	GO:0010467//gene expression	gi|357435975|ref|XP_003588263.1|/8.35772e-106/NADH-ubiquinone oxidoreductase chain [Medicago truncatula]
CL2556.Contig1_NAU-LB	1396	180	481	31.2634	66.2515	1.08348	Up	2.20754e-19	3.13528e-18	K10610|1|1e-24|112|ota:Ot10g03450|DNA damage-binding protein 1;K03671|2|2e-08|58.5|ppp:PHYPADRAFT_150335|thioredoxin 1	GO:0009941//chloroplast envelope;GO:0009532//plastid stroma	GO:0015036//disulfide oxidoreductase activity	GO:0018904;GO:0019725//cellular homeostasis	gi|312282269|dbj|BAJ34000.1|/4.54939e-94/unnamed protein product [Thellungiella halophila]
gi|154173317|gb|EV544590.1|EV544590	702	216	575	74.6047	157.495	1.07797	Up	1.07037e-22	1.75157e-21	K15378|1|6e-34|142|aly:ARALYDRAFT_895034|solute carrier family 45, member 1/2/4	GO:0043231//intracellular membrane-bounded organelle;GO:0016020//membrane	GO:0015154;GO:0005351//sugar:hydrogen symporter activity	GO:0015766;GO:0009791//post-embryonic development;GO:0051707//response to other organism;GO:0009856//pollination	gi|18091779|gb|AAL58071.1|/1.53248e-41/sucrose transporter SUC1 [Brassica oleracea]
Unigene13325_NAU-LB	1099	36	95	7.94245	16.6212	1.06537	Up	8.84272e-05	0.00038403	-	-	GO:0016741	GO:0006970//response to osmotic stress;GO:0006730//one-carbon metabolic process	gi|297820154|ref|XP_002877960.1|/5.49873e-150/hypothetical protein ARALYDRAFT_485812 [Arabidopsis lyrata subsp. lyrata]
CL791.Contig4_NAU-LB	859	68	179	19.194	40.0678	1.06179	Up	7.1352e-08	4.62984e-07	K09757|1|2e-70|263|ath:AT2G22990|serine carboxypeptidase-like 8 [EC:3.4.16.- 2.3.1.92];K09756|2|6e-54|209|ath:AT5G09640|serine carboxypeptidase-like 19 [EC:3.4.16.- 2.3.1.91];K13289|3|1e-47|188|mtr:MTR_4g021500|cathepsin A (carboxypeptidase C) [EC:3.4.16.5]	GO:0005618//cell wall	GO:0004180//carboxypeptidase activity;GO:0016753	GO:0019538//protein metabolic process;GO:0006725//cellular aromatic compound metabolic process	gi|79313179|ref|NP_001030669.1|/2.18689e-81/serine carboxypeptidase-like 7 [Arabidopsis thaliana]
CL2393.Contig1_NAU-LB	1183	43	113	8.81319	18.3666	1.05935	Up	2.02868e-05	9.75454e-05	K01673|1|2e-146|517|aly:ARALYDRAFT_475428|carbonic anhydrase [EC:4.2.1.1]	GO:0043231//intracellular membrane-bounded organelle	GO:0046914//transition metal ion binding;GO:0016836//hydro-lyase activity	-	gi|297840707|ref|XP_002888235.1|/2.0205e-145/carbonic anhydrase family protein [Arabidopsis lyrata subsp. lyrata]
Unigene19102_NAU-LB	231	53	139	55.6305	115.701	1.05646	Up	2.33126e-06	1.26296e-05	-	-	-	-	-
gi|332792084|gb|FY447866.1|FY447866	811	50	131	14.9485	31.0589	1.055	Up	4.7005e-06	2.44728e-05	-	-	-	-	gi|297820198|ref|XP_002877982.1|/8.97696e-34/hypothetical protein ARALYDRAFT_485852 [Arabidopsis lyrata subsp. lyrata]
gnl|UG|Rsa#S41987411	698	46	120	15.9791	33.0569	1.04877	Up	1.31355e-05	6.46644e-05	K11596|1|9e-30|128|aly:ARALYDRAFT_917259|argonaute;K11593|3|2e-29|127|mtr:MTR_4g113200|eukaryotic translation initiation factor 2C	-	GO:0003723//RNA binding	GO:0002252	gi|145336300|ref|NP_174413.2|/1.32131e-61/Argonaute family protein [Arabidopsis thaliana]
Unigene24040_NAU-LB	901	33	86	8.88052	18.3531	1.04731	Up	0.000237506	0.000954092	-	-	-	-	gi|297809179|ref|XP_002872473.1|/1.17258e-64/hypothetical protein ARALYDRAFT_911262 [Arabidopsis lyrata subsp. lyrata]
Unigene21480_NAU-LB	1845	51	131	6.70229	13.6525	1.02644	Up	7.5877e-06	3.8601e-05	K05857|1|1e-06|53.5|pop:POPTR_875869|phosphatidylinositol phospholipase C, delta [EC:3.1.4.11];K01115|2|2e-06|52.8|rcu:RCOM_1599570|phospholipase D [EC:3.1.4.4]	-	-	-	gi|42573265|ref|NP_974729.1|/0/calcium-dependent lipid-binding domain-containing protein [Arabidopsis thaliana]
gnl|UG|Rsa#S43011926	666	89	228	32.4015	65.8259	1.02259	Up	3.57214e-09	2.63637e-08	-	-	-	-	gi|297804614|ref|XP_002870191.1|/1.01357e-07/hypothetical protein ARALYDRAFT_915172 [Arabidopsis lyrata subsp. lyrata]
Unigene7513_NAU-LB	1972	176	448	21.6399	43.6825	1.01336	Up	1.91434e-16	2.34242e-15	-	-	-	-	gi|15238825|ref|NP_199597.1|/0/uncharacterized protein [Arabidopsis thaliana]
Unigene19993_NAU-LB	921	230	585	60.5505	122.133	1.01224	Up	5.6183e-21	8.599e-20	-	-	-	-	-
Unigene12485_NAU-LB	654	116	294	43.0061	86.4382	1.00713	Up	3.47016e-11	3.03306e-10	-	-	-	-	gi|297853332|ref|XP_002894547.1|/1.0657e-06/hypothetical protein ARALYDRAFT_314809 [Arabidopsis lyrata subsp. lyrata]
CL4114.Contig1_NAU-LB	2015	73	46	8.7841	4.38954	-1.00083	Down	0.000182311	0.000750813	K13123|1|0.0|707|aly:ARALYDRAFT_489162|G patch domain-containing protein 1	GO:0043231//intracellular membrane-bounded organelle	GO:0003676//nucleic acid binding	GO:0009888//tissue development;GO:0009755//hormone-mediated signaling pathway;GO:0060918//auxin transport;GO:0010467//gene expression	gi|297812455|ref|XP_002874111.1|/0/hypothetical protein ARALYDRAFT_489162 [Arabidopsis lyrata subsp. lyrata]
Unigene19282_NAU-LB	1613	1338	843	201.127	100.491	-1.00104	Down	6.50318e-58	2.5494e-56	K08232|1|0.0|747|aly:ARALYDRAFT_485659|monodehydroascorbate reductase (NADH) [EC:1.6.5.4]	GO:0005576//extracellular region;GO:0016020//membrane;GO:0042579//microbody;GO:0009536//plastid	GO:0016655//oxidoreductase activity, acting on NAD(P)H, quinone or similar compound as acceptor;GO:0050662//coenzyme binding	GO:0042743//hydrogen peroxide metabolic process;GO:0019725//cellular homeostasis;GO:0010038//response to metal ion	gi|14764532|gb|AAK72107.1|/0/monodehydroascorbate reductase [Brassica rapa subsp. pekinensis]
Unigene17417_NAU-LB	1429	259	163	43.9458	21.9327	-1.00264	Down	1.59994e-12	1.54677e-11	K06883|1|3e-156|550|ath:AT4G21800|	GO:0015630//microtubule cytoskeleton	GO:0032559	GO:0007275//multicellular organismal development;GO:0009987//cellular process	gi|15234595|ref|NP_193911.1|/3.63918e-155/XPA-binding protein 1 [Arabidopsis thaliana]
Unigene11247_NAU-LB	1491	78	49	12.6843	6.31909	-1.00525	Down	0.000103235	0.000442088	K00284|1|0.0|803|aly:ARALYDRAFT_483191|glutamate synthase (ferredoxin) [EC:1.4.7.1]	GO:0009532//plastid stroma;GO:0009526//plastid envelope;GO:0005576//extracellular region	GO:0043169//cation binding;GO:0051536//iron-sulfur cluster binding;GO:0015930//glutamate synthase activity	GO:0009314//response to radiation;GO:0031323//regulation of cellular metabolic process;GO:0006536//glutamate metabolic process;GO:0043094	gi|297824067|ref|XP_002879916.1|/0/hypothetical protein ARALYDRAFT_483191 [Arabidopsis lyrata subsp. lyrata]
CL5021.Contig1_NAU-LB	2785	301	189	26.2054	13.0489	-1.00594	Down	2.20478e-14	2.39098e-13	K04733|1|0.0|1121|aly:ARALYDRAFT_916421|interleukin-1 receptor-associated kinase 4 [EC:2.7.11.1];K00924|3|4e-63|241|ath:AT3G59420|[EC:2.7.1.-]	GO:0016020//membrane;GO:0044426	GO:0004672//protein kinase activity;GO:0000166//nucleotide binding	GO:0006952//defense response;GO:0007275//multicellular organismal development;GO:0006468//protein phosphorylation;GO:0009856//pollination	gi|10177545|dbj|BAB10824.1|/0/receptor-like protein kinase [Arabidopsis thaliana]
CL2716.Contig1_NAU-LB	1707	188	118	26.7038	13.2918	-1.00651	Down	1.55814e-09	1.18684e-08	K13523|1|0.0|736|ath:AT3G57650|lysophosphatidic acid acyltransferase / lysophosphatidylinositol acyltransferase [EC:2.3.1.51 2.3.1.-]	GO:0031090//organelle membrane;GO:0043231//intracellular membrane-bounded organelle;GO:0031224//intrinsic to membrane	GO:0016411//acylglycerol O-acyltransferase activity	GO:0006644//phospholipid metabolic process	gi|83287830|sp|Q9XFW4.1|LPAT2_BRANA/0/RecName: Full=1-acyl-sn-glycerol-3-phosphate acyltransferase 2; AltName: Full=Lysophosphatidyl acyltransferase 2
CL4921.Contig1_NAU-LB	1431	75	47	12.7078	6.31531	-1.00879	Down	0.000134327	0.000561311	K11982|1|7e-11|67.0|sbi:SORBI_03g011120|E3 ubiquitin-protein ligase RNF115/126 [EC:6.3.2.19];K13148|2|1e-10|66.2|vvi:100261060|integrator complex subunit 11 [EC:3.1.27.-];K15692|5|9e-09|60.1|ppp:PHYPADRAFT_16563|E3 ubiquitin-protein ligase RNF13 [EC:6.3.2.19]	GO:0031410//cytoplasmic vesicle	GO:0046914//transition metal ion binding;GO:0019787//small conjugating protein ligase activity	GO:0009756//carbohydrate mediated signaling;GO:0032446//protein modification by small protein conjugation	gi|297819412|ref|XP_002877589.1|/0/zinc finger family protein [Arabidopsis lyrata subsp. lyrata]
gnl|UG|Rsa#S43014527	815	91	57	27.0728	13.4479	-1.00947	Down	2.56296e-05	0.000121171	K10599|1|9e-74|238|aly:ARALYDRAFT_482274|pre-mRNA-processing factor 19 [EC:6.3.2.19]	GO:0031461//cullin-RING ubiquitin ligase complex;GO:0030312//external encapsulating structure;GO:0009536//plastid;GO:0031981//nuclear lumen	GO:0005488//binding;GO:0019787//small conjugating protein ligase activity	GO:0006952//defense response;GO:0032446//protein modification by small protein conjugation;GO:0010038//response to metal ion	gi|2459417|gb|AAB80652.1|/9.59355e-78/putative PRP19-like spliceosomal protein [Arabidopsis thaliana]
CL1919.Contig5_NAU-LB	1485	267	167	43.5948	21.6235	-1.01155	Down	4.943e-13	4.93581e-12	K10839|1|4e-140|496|aly:ARALYDRAFT_494129|UV excision repair protein RAD23	GO:0043231//intracellular membrane-bounded organelle	GO:0032182//small conjugating protein binding;GO:0032403//protein complex binding	GO:0006281//DNA repair	gi|297805910|ref|XP_002870839.1|/5.0227e-139/hypothetical protein ARALYDRAFT_494129 [Arabidopsis lyrata subsp. lyrata]
gi|154177130|gb|EV546471.1|EV546471	858	80	50	22.6075	11.2052	-1.01263	Down	7.61112e-05	0.000332517	K07870|1|1e-92|337|aly:ARALYDRAFT_489574|Ras homolog gene family, member T1	GO:0031966//mitochondrial membrane	GO:0046872//metal ion binding;GO:0032561//guanyl ribonucleotide binding;GO:0003824//catalytic activity	GO:0035556//intracellular signal transduction;GO:0006996//organelle organization;GO:0034643//establishment of mitochondrion localization, microtubule-mediated;GO:0007275//multicellular organismal development;GO:0003006//developmental process involved in reproduction;GO:0000904//cell morphogenesis involved in differentiation	gi|297812963|ref|XP_002874365.1|/1.35822e-91/EMB2473 [Arabidopsis lyrata subsp. lyrata]
CL4258.Contig1_NAU-LB	1107	587	366	128.57	63.5725	-1.01608	Down	5.47866e-27	1.04946e-25	K09264|1|8e-33|139|aly:ARALYDRAFT_486333|MADS-box transcription factor, plant	GO:0043231//intracellular membrane-bounded organelle	GO:0001071//nucleic acid binding transcription factor activity;GO:0003677//DNA binding;GO:0005515//protein binding	GO:0009725//response to hormone stimulus;GO:0006606//protein import into nucleus;GO:0009908//flower development;GO:0010074//maintenance of meristem identity;GO:0006351//transcription, DNA-dependent;GO:0006950//response to stress	gi|33771690|gb|AAQ54337.1|/6.69981e-87/MADS-box protein [Brassica rapa subsp. campestris]
CL3184.Contig1_NAU-LB	2755	154	96	13.5534	6.70017	-1.01639	Down	3.61048e-08	2.40392e-07	K04079|1|0.0|1134|rcu:RCOM_0483320|molecular chaperone HtpG	GO:0043231//intracellular membrane-bounded organelle;GO:0030312//external encapsulating structure	GO:0005515//protein binding;GO:0032559	GO:0050896//response to stimulus;GO:0044267//cellular protein metabolic process	gi|145338243|ref|NP_187434.2|/0/HEAT SHOCK PROTEIN 89.1 [Arabidopsis thaliana]
Unigene384_NAU-LB	2179	308	192	34.2723	16.9426	-1.01639	Down	6.54202e-15	7.33046e-14	K01490|1|0.0|1243|aly:ARALYDRAFT_482837|AMP deaminase [EC:3.5.4.6]	GO:0043231//intracellular membrane-bounded organelle;GO:0044444//cytoplasmic part	GO:0016814//hydrolase activity, acting on carbon-nitrogen (but not peptide) bonds, in cyclic amidines;GO:0019901//protein kinase binding	GO:0009725//response to hormone stimulus;GO:0009127//purine nucleoside monophosphate biosynthetic process;GO:0003006//developmental process involved in reproduction	gi|297827385|ref|XP_002881575.1|/0/hypothetical protein ARALYDRAFT_482837 [Arabidopsis lyrata subsp. lyrata]
gnl|UG|Rsa#S42025920	760	191	119	60.9353	30.1071	-1.01717	Down	8.26584e-10	6.42284e-09	K12669|1|7e-34|142|aly:ARALYDRAFT_334448|oligosaccharyltransferase complex subunit gamma	GO:0012505//endomembrane system;GO:0043231//intracellular membrane-bounded organelle;GO:0016020//membrane	GO:0017016//Ras GTPase binding;GO:0022892	GO:0051169//nuclear transport;GO:0006605//protein targeting	gi|297851158|ref|XP_002893460.1|/1.94518e-64/hypothetical protein ARALYDRAFT_890252 [Arabidopsis lyrata subsp. lyrata]
gi|332786360|gb|FY441888.1|FY441888	829	87	54	25.4457	12.5249	-1.02262	Down	3.18574e-05	0.000147996	K03869|1|1e-126|450|ath:AT1G26830|cullin 3	GO:0031461//cullin-RING ubiquitin ligase complex	GO:0019899//enzyme binding	GO:0009416//response to light stimulus;GO:0019941//modification-dependent protein catabolic process;GO:0009908//flower development	gi|15223361|ref|NP_174005.1|/1.35786e-125/cullin 3 [Arabidopsis thaliana]
CL144.Contig2_NAU-LB	1853	137	85	17.9265	8.82022	-1.0232	Down	1.74691e-07	1.08368e-06	K14423|1|2e-13|76.3|aly:ARALYDRAFT_329352|4,4-dimethyl-9beta,19-cyclopropylsterol-4alpha-methyl oxidase [EC:1.14.13.72];K06674|2|3e-12|72.0|vcn:VOLCADRAFT_106052|structural maintenance of chromosome 2	GO:0016020//membrane	GO:0016628//oxidoreductase activity, acting on the CH-CH group of donors, NAD or NADP as acceptor;GO:0046914//transition metal ion binding	GO:0032501//multicellular organismal process;GO:0008152//metabolic process	gi|122242508|sp|Q0WQK2.1|ZDHC9_ARATH/0/RecName: Full=Probable S-acyltransferase At3g26935; AltName: Full=Probable palmitoyltransferase At3g26935; AltName: Full=Zinc finger DHHC domain-containing protein At3g26935
CL9060.Contig4_NAU-LB	1430	71	44	12.0385	5.91633	-1.02488	Down	0.000167337	0.000692998	K01090|1|6e-172|602|ath:AT1G64040|protein phosphatase [EC:3.1.3.16];K06269|2|5e-160|562|rcu:RCOM_1689260|protein phosphatase 1, catalytic subunit [EC:3.1.3.16]	GO:0008287//protein serine/threonine phosphatase complex;GO:0031981//nuclear lumen	GO:0043169//cation binding;GO:0004721//phosphoprotein phosphatase activity	GO:0006464//cellular protein modification process	gi|15222607|ref|NP_176587.1|/8.06972e-171/serine/threonine-protein phosphatase PP1 isozyme 3 [Arabidopsis thaliana]
CL10001.Contig2_NAU-LB	1437	126	78	21.26	10.437	-1.02644	Down	5.08394e-07	2.98302e-06	K12183|1|1e-162|571|aly:ARALYDRAFT_897451|ESCRT-I complex subunit TSG101	GO:0032991//macromolecular complex;GO:0010008//endosome membrane	GO:0032182//small conjugating protein binding	GO:0006810//transport;GO:0019538//protein metabolic process;GO:0043412//macromolecule modification;GO:0000904//cell morphogenesis involved in differentiation	gi|297834038|ref|XP_002884901.1|/1.53421e-161/ATELC [Arabidopsis lyrata subsp. lyrata]
CL7258.Contig1_NAU-LB	1670	202	125	29.3281	14.3923	-1.02699	Down	1.95732e-10	1.60527e-09	K01689|1|0.0|863|ath:AT2G36530|enolase [EC:4.2.1.11]	GO:0043234//protein complex;GO:0031967;GO:0009536//plastid;GO:0005576//extracellular region;GO:0016020//membrane	GO:0003676//nucleic acid binding;GO:0046914//transition metal ion binding;GO:0016836//hydro-lyase activity	GO:0009314//response to radiation;GO:0006007//glucose catabolic process;GO:0010038//response to metal ion;GO:0009725//response to hormone stimulus;GO:0006970//response to osmotic stress	gi|90194338|gb|ABD92697.1|/0/los [Brassica rapa subsp. chinensis]
gi|166107989|gb|FD539230.1|FD539230	700	1529	946	529.613	259.854	-1.02724	Down	9.88462e-69	4.59044e-67	K08914|1|4e-106|382|aly:ARALYDRAFT_495512|light-harvesting complex II chlorophyll a/b binding protein 3	GO:0009521;GO:0031224//intrinsic to membrane;GO:0009534//chloroplast thylakoid	GO:0046906//tetrapyrrole binding;GO:0043169//cation binding	GO:0006464//cellular protein modification process;GO:0006091//generation of precursor metabolites and energy	gi|312281753|dbj|BAJ33742.1|/1.96469e-105/unnamed protein product [Thellungiella halophila]
CL1695.Contig1_NAU-LB	1483	241	149	39.4026	19.3188	-1.02828	Down	3.4094e-12	3.22212e-11	K13430|1|2e-123|441|pop:POPTR_413452|serine/threonine-protein kinase PBS1 [EC:2.7.11.1]	GO:0009526//plastid envelope	GO:0004702//receptor signaling protein serine/threonine kinase activity;GO:0032559	GO:0006464//cellular protein modification process	gi|145335950|ref|NP_173489.2|/0/protein kinase-like protein [Arabidopsis thaliana]
CL9275.Contig1_NAU-LB	1701	225	139	32.0721	15.7125	-1.0294	Down	1.68964e-11	1.51517e-10	K00033|1|0.0|912|ath:AT3G02360|6-phosphogluconate dehydrogenase [EC:1.1.1.44]	GO:0042579//microbody	GO:0016616//oxidoreductase activity, acting on the CH-OH group of donors, NAD or NADP as acceptor;GO:0048037//cofactor binding;GO:0000166//nucleotide binding	GO:0006970//response to osmotic stress;GO:0006007//glucose catabolic process	gi|15232888|ref|NP_186885.1|/0/6-phosphogluconate dehydrogenase [Arabidopsis thaliana]
Unigene10971_NAU-LB	1362	68	42	12.1055	5.92937	-1.02971	Down	0.000217694	0.000883184	K08956|1|0.0|772|ath:AT1G07510|AFG3 family protein [EC:3.4.24.-]	GO:0031224//intrinsic to membrane;GO:0009534//chloroplast thylakoid	GO:0004175//endopeptidase activity;GO:0046914//transition metal ion binding;GO:0042623//ATPase activity, coupled;GO:0032559	GO:0009057//macromolecule catabolic process;GO:0019538//protein metabolic process	gi|22329400|ref|NP_172231.2|/0/FTSH protease 10 [Arabidopsis thaliana]
CL7374.Contig1_NAU-LB	1783	285	176	38.7564	18.9801	-1.02995	Down	3.4816e-14	3.73699e-13	K13811|1|0.0|837|aly:ARALYDRAFT_472217|3'-phosphoadenosine 5'-phosphosulfate synthase [EC:2.7.7.4 2.7.1.25]	GO:0009536//plastid	GO:0004779//sulfate adenylyltransferase activity	GO:0006790//sulfur compound metabolic process	gi|1589913|gb|AAB67995.1|/0/ATP-sulfurylase precursor [Brassica oleracea]
gnl|UG|Rsa#S42024090	842	94	58	27.0686	13.245	-1.03117	Down	1.33645e-05	6.57742e-05	K02146|1|9e-96|333|aly:ARALYDRAFT_484645|V-type H+-transporting ATPase subunit AC39 [EC:3.6.3.14]	GO:0033176;GO:0031090//organelle membrane;GO:0005773//vacuole	GO:0015077//monovalent inorganic cation transmembrane transporter activity;GO:0019829//cation-transporting ATPase activity	GO:0006754//ATP biosynthetic process;GO:0015988//energy coupled proton transmembrane transport, against electrochemical gradient	gi|15233060|ref|NP_189512.1|/1.10031e-94/V-type proton ATPase subunit d1 [Arabidopsis thaliana]
CL1511.Contig4_NAU-LB	652	73	45	27.1472	13.2709	-1.03253	Down	0.000122989	0.000514937	K10143|1|7e-77|284|aly:ARALYDRAFT_897813|E3 ubiquitin-protein ligase RFWD2 [EC:6.3.2.19]	GO:0031234//extrinsic to internal side of plasma membrane;GO:0031461//cullin-RING ubiquitin ligase complex	GO:0016301//kinase activity;GO:0005515//protein binding;GO:0016628//oxidoreductase activity, acting on the CH-CH group of donors, NAD or NADP as acceptor;GO:0032559	GO:0006464//cellular protein modification process	gi|297847694|ref|XP_002891728.1|/1.04368e-78/predicted protein [Arabidopsis lyrata subsp. lyrata]
CL9412.Contig2_NAU-LB	1330	96	59	17.5012	8.52975	-1.03688	Down	9.85606e-06	4.9244e-05	K13237|1|1e-126|451|aly:ARALYDRAFT_478642|peroxisomal 2,4-dienoyl-CoA reductase [EC:1.3.1.34]	GO:0042579//microbody;GO:0031090//organelle membrane	GO:0016628//oxidoreductase activity, acting on the CH-CH group of donors, NAD or NADP as acceptor	GO:0008152//metabolic process	gi|297834090|ref|XP_002884927.1|/1.60066e-125/short-chain dehydrogenase/reductase family protein [Arabidopsis lyrata subsp. lyrata]
CL6925.Contig1_NAU-LB	2223	127	78	13.852	6.7467	-1.03784	Down	3.5945e-07	2.16625e-06	K12605|1|0.0|924|aly:ARALYDRAFT_496103|CCR4-NOT transcription complex subunit 2	GO:0043231//intracellular membrane-bounded organelle	GO:0005488//binding	GO:0006259//DNA metabolic process;GO:0006355//regulation of transcription, DNA-dependent	gi|297793527|ref|XP_002864648.1|/0/hypothetical protein ARALYDRAFT_496103 [Arabidopsis lyrata subsp. lyrata]
Unigene790_NAU-LB	1741	127	78	17.687	8.61454	-1.03784	Down	3.5945e-07	2.16648e-06	K12486|1|2e-13|76.3|rcu:RCOM_0517460|stromal membrane-associated protein	GO:0044424//intracellular part	GO:0017111//nucleoside-triphosphatase activity;GO:0032561//guanyl ribonucleotide binding	GO:0051707//response to other organism;GO:0009207;GO:0051169//nuclear transport	gi|22328591|ref|NP_193071.2|/0/NSP (nuclear shuttle protein)-interacting GTPase [Arabidopsis thaliana]
Unigene18013_NAU-LB	1200	106	65	21.4178	10.4152	-1.04012	Down	3.20546e-06	1.71368e-05	K00411|1|5e-142|502|aly:ARALYDRAFT_488163|ubiquinol-cytochrome c reductase iron-sulfur subunit [EC:1.10.2.2]	GO:0031224//intrinsic to membrane;GO:0005746//mitochondrial respiratory chain	GO:0043169//cation binding;GO:0016491//oxidoreductase activity;GO:0051536//iron-sulfur cluster binding;GO:0015078//hydrogen ion transmembrane transporter activity	GO:0051234//establishment of localization;GO:0006091//generation of precursor metabolites and energy	gi|297811459|ref|XP_002873613.1|/6.90315e-141/hypothetical protein ARALYDRAFT_488163 [Arabidopsis lyrata subsp. lyrata]
Unigene14651_NAU-LB	1288	1396	855	262.796	127.64	-1.04187	Down	2.33294e-64	1.01794e-62	K04371|1|8e-24|109|vvi:100254083|extracellular signal-regulated kinase 1/2 [EC:2.7.11.24];K09060|2|1e-09|62.8|bdi:100826051|plant G-box-binding factor	GO:0043231//intracellular membrane-bounded organelle	GO:0003677//DNA binding;GO:0001071//nucleic acid binding transcription factor activity;GO:0046983//protein dimerization activity	GO:0006351//transcription, DNA-dependent	gi|297821154|ref|XP_002878460.1|/1.41378e-62/ATBZIP53 [Arabidopsis lyrata subsp. lyrata]
CL8395.Contig1_NAU-LB	1126	98	60	21.1027	10.2459	-1.04238	Down	7.2671e-06	3.70581e-05	K12862|1|3e-163|572|ath:AT4G15900|pleiotropic regulator 1	GO:0043231//intracellular membrane-bounded organelle;GO:0031461//cullin-RING ubiquitin ligase complex	GO:0004683//calmodulin-dependent protein kinase activity;GO:0005488//binding	GO:0009793//embryo development ending in seed dormancy;GO:0009756//carbohydrate mediated signaling;GO:0006355//regulation of transcription, DNA-dependent;GO:0048827//phyllome development;GO:0009746;GO:0002218//activation of innate immune response;GO:0019538//protein metabolic process	gi|312281513|dbj|BAJ33622.1|/9.9833e-163/unnamed protein product [Thellungiella halophila]
gi|154171258|gb|EV542532.1|EV542532	910	67	41	17.8518	8.6632	-1.0431	Down	0.000207732	0.000843939	K02133|1|4e-111|399|aly:ARALYDRAFT_487710|F-type H+-transporting ATPase subunit beta [EC:3.6.3.14]	GO:0031981//nuclear lumen;GO:0005746//mitochondrial respiratory chain;GO:0000275//mitochondrial proton-transporting ATP synthase complex, catalytic core F(1);GO:0009526//plastid envelope	GO:0046914//transition metal ion binding;GO:0019829//cation-transporting ATPase activity;GO:0015078//hydrogen ion transmembrane transporter activity;GO:0032559;GO:0008187//poly-pyrimidine tract binding;GO:0015662//ATPase activity, coupled to transmembrane movement of ions, phosphorylative mechanism	GO:0015988//energy coupled proton transmembrane transport, against electrochemical gradient;GO:0009207;GO:0010038//response to metal ion;GO:0015986//ATP synthesis coupled proton transport;GO:0006950//response to stress	gi|297806945|ref|XP_002871356.1|/5.46314e-110/ATP synthase beta chain 1, mitochondrial [Arabidopsis lyrata subsp. lyrata]
gi|161539660|gb|EY912205.1|EY912205	806	90	55	27.0743	13.1209	-1.04506	Down	1.65167e-05	8.04825e-05	K08150|1|1e-20|98.2|ath:AT2G43330|MFS transporter, SP family, solute carrier family 2 (myo-inositol transporter), member 13	GO:0031224//intrinsic to membrane	GO:0016491//oxidoreductase activity;GO:0051119//sugar transmembrane transporter activity	GO:0008643//carbohydrate transport	gi|15230590|ref|NP_187247.1|/5.81679e-102/sugar transport protein 6 [Arabidopsis thaliana]
gnl|UG|Rsa#S42049339	1049	172	105	39.756	19.2464	-1.04658	Down	2.44748e-09	1.83039e-08	K12135|1|1e-61|234|aly:ARALYDRAFT_488429|zinc finger protein CONSTANS;K12129|4|3e-09|60.8|vvi:100246836|pseudo-response regulator 7;K03539|5|8e-09|59.7|bdi:100830772|ribonuclease P/MRP protein subunit RPP1 [EC:3.1.26.5]	GO:0043231//intracellular membrane-bounded organelle	GO:0046914//transition metal ion binding;GO:0001071//nucleic acid binding transcription factor activity	GO:0009640//photomorphogenesis;GO:0006351//transcription, DNA-dependent;GO:0010017//red or far-red light signaling pathway	gi|3341723|gb|AAC35496.1|/1.47968e-165/CONSTANS-like 1 protein [Raphanus sativus]
CL4422.Contig2_NAU-LB	1305	308	188	57.2255	27.7002	-1.04676	Down	1.40292e-15	1.63324e-14	K12135|1|2e-09|62.4|aly:ARALYDRAFT_488429|zinc finger protein CONSTANS	GO:0044464//cell part	GO:0046914//transition metal ion binding;GO:0001071//nucleic acid binding transcription factor activity	GO:0006351//transcription, DNA-dependent	gi|297841575|ref|XP_002888669.1|/1.71033e-164/zinc finger (B-box type) family protein [Arabidopsis lyrata subsp. lyrata]
CL6354.Contig3_NAU-LB	844	92	56	26.4299	12.758	-1.05077	Down	1.21604e-05	6.03771e-05	K14664|1|7e-95|345|ath:AT5G56660|IAA-amino acid hydrolase [EC:3.5.1.-]	GO:0043231//intracellular membrane-bounded organelle;GO:0016020//membrane	GO:0010178//IAA-amino acid conjugate hydrolase activity;GO:0070011//peptidase activity, acting on L-amino acid peptides	GO:0042445//hormone metabolic process;GO:0006950//response to stress	gi|81239129|gb|ABB60092.1|/9.09455e-101/IAA-amino acid hydrolase 2 [Brassica rapa]
gi|167506917|gb|FD989318.1|FD989318	745	102	62	33.1966	16.0019	-1.05279	Down	3.94836e-06	2.08498e-05	K03013|1|1e-08|58.2|vvi:100258335|DNA-directed RNA polymerases I, II, and III subunit RPABC1	GO:0044464//cell part;GO:0005576//extracellular region	GO:0016462//pyrophosphatase activity;GO:0032559;GO:0016772//transferase activity, transferring phosphorus-containing groups	GO:0009607//response to biotic stimulus;GO:0009628//response to abiotic stimulus;GO:0006950//response to stress;GO:0012501//programmed cell death;GO:0006796//phosphate-containing compound metabolic process	gi|297798606|ref|XP_002867187.1|/7.74955e-111/hypothetical protein ARALYDRAFT_913089 [Arabidopsis lyrata subsp. lyrata]
gi|154098949|gb|EV531922.1|EV531922	895	107	65	28.9875	13.9645	-1.05366	Down	2.25358e-06	1.22231e-05	K12852|1|1e-127|453|aly:ARALYDRAFT_470642|116 kDa U5 small nuclear ribonucleoprotein component	GO:0030312//external encapsulating structure;GO:0016604//nuclear body;GO:0016020//membrane	GO:0017111//nucleoside-triphosphatase activity;GO:0003723//RNA binding;GO:0032561//guanyl ribonucleotide binding	GO:0045595//regulation of cell differentiation;GO:0009207;GO:0003006//developmental process involved in reproduction	gi|15221423|ref|NP_172112.1|/1.81676e-126/U5 small nuclear ribonucleoprotein component [Arabidopsis thaliana]
CL230.Contig4_NAU-LB	2240	188	114	20.3498	9.78572	-1.05626	Down	3.30082e-10	2.65081e-09	K04733|1|4e-62|238|smo:SELMODRAFT_159261|interleukin-1 receptor-associated kinase 4 [EC:2.7.11.1];K13430|3|1e-60|233|zma:100283091|serine/threonine-protein kinase PBS1 [EC:2.7.11.1]	GO:0016020//membrane;GO:0009536//plastid	GO:0004672//protein kinase activity;GO:0032559	GO:0006952//defense response;GO:0006464//cellular protein modification process;GO:0010033//response to organic substance;GO:0008219//cell death	gi|297803800|ref|XP_002869784.1|/0/hypothetical protein ARALYDRAFT_492546 [Arabidopsis lyrata subsp. lyrata]
CL6038.Contig1_NAU-LB	1716	99	60	13.9884	6.72311	-1.05703	Down	5.10054e-06	2.65183e-05	K01267|1|0.0|909|aly:ARALYDRAFT_332278|aspartyl aminopeptidase [EC:3.4.11.21]	GO:0031090//organelle membrane;GO:0043231//intracellular membrane-bounded organelle	GO:0046914//transition metal ion binding;GO:0008238//exopeptidase activity	GO:0019538//protein metabolic process;GO:0010038//response to metal ion	gi|297796979|ref|XP_002866374.1|/0/hypothetical protein ARALYDRAFT_332278 [Arabidopsis lyrata subsp. lyrata]
Unigene3917_NAU-LB	1452	172	104	28.7218	13.7722	-1.06039	Down	1.64369e-09	1.25097e-08	K00485|1|2e-165|580|ath:AT1G12200|dimethylaniline monooxygenase (N-oxide forming) [EC:1.14.13.8];K11816|5|4e-11|67.8|aly:ARALYDRAFT_353573|YUCCA family monooxygenase [EC:1.14.13.-]	GO:0043231//intracellular membrane-bounded organelle	GO:0016709//oxidoreductase activity, acting on paired donors, with incorporation or reduction of molecular oxygen, NAD(P)H as one donor, and incorporation of one atom of oxygen;GO:0050662//coenzyme binding;GO:0000166//nucleotide binding	GO:0008152//metabolic process	gi|297840267|ref|XP_002888015.1|/0/hypothetical protein ARALYDRAFT_475088 [Arabidopsis lyrata subsp. lyrata]
CL390.Contig2_NAU-LB	2932	134	81	11.0813	5.31199	-1.0608	Down	1.0216e-07	6.49324e-07	K09489|1|0.0|1331|aly:ARALYDRAFT_896005|heat shock 70kDa protein 4	GO:0043231//intracellular membrane-bounded organelle;GO:0016020//membrane;GO:0030312//external encapsulating structure	GO:0016628//oxidoreductase activity, acting on the CH-CH group of donors, NAD or NADP as acceptor;GO:0032559	GO:0006950//response to stress;GO:0008152//metabolic process;GO:0010038//response to metal ion	gi|297839943|ref|XP_002887853.1|/0/hypothetical protein ARALYDRAFT_896005 [Arabidopsis lyrata subsp. lyrata]
Unigene17990_NAU-LB	1216	288	174	57.426	27.5139	-1.06154	Down	5.66868e-15	6.3996e-14	K06630|1|6e-117|419|gmx:547990|tyrosine 3-monooxygenase/tryptophan 5-monooxygenase activation protein	GO:0009532//plastid stroma;GO:0016020//membrane	GO:0046872//metal ion binding;GO:0005515//protein binding	GO:0048827//phyllome development	gi|224981575|gb|ACN73535.1|/8.04288e-137/1433-2 [Brassica napus]
gi|167500270|gb|FD985293.1|FD985293	843	202	122	58.0996	27.8271	-1.06204	Down	6.02028e-11	5.15498e-10	K14510|1|6e-33|139|aly:ARALYDRAFT_487152|serine/threonine-protein kinase CTR1 [EC:2.7.11.1]	GO:0043231//intracellular membrane-bounded organelle;GO:0044444//cytoplasmic part	GO:0004672//protein kinase activity;GO:0032559	GO:0006464//cellular protein modification process	gi|15226883|ref|NP_181050.1|/4.52131e-116/octicosapeptide/Phox/Be.1 domain-containing protein kinase [Arabidopsis thaliana]
CL7173.Contig2_NAU-LB	855	154	93	43.6721	20.9148	-1.06219	Down	1.11034e-08	7.812e-08	K00327|1|4e-112|402|aly:ARALYDRAFT_492391|NADPH-ferrihemoprotein reductase [EC:1.6.2.4]	GO:0031090//organelle membrane;GO:0043231//intracellular membrane-bounded organelle	GO:0046914//transition metal ion binding;GO:0016653//oxidoreductase activity, acting on NAD(P)H, heme protein as acceptor;GO:0000166//nucleotide binding	GO:0009725//response to hormone stimulus;GO:0009607//response to biotic stimulus;GO:0006725//cellular aromatic compound metabolic process;GO:0006950//response to stress	gi|297799556|ref|XP_002867662.1|/4.49011e-111/hypothetical protein ARALYDRAFT_492391 [Arabidopsis lyrata subsp. lyrata]
Unigene15644_NAU-LB	1992	151	91	18.3796	8.78392	-1.06517	Down	1.42803e-08	9.93154e-08	K10526|1|4e-128|457|aly:ARALYDRAFT_472278|OPC-8:0 CoA ligase 1 [EC:6.2.1.-]	GO:0042579//microbody	GO:0016491//oxidoreductase activity;GO:0016408	GO:0009694//jasmonic acid metabolic process;GO:0009850//auxin metabolic process	gi|297797333|ref|XP_002866551.1|/0/hypothetical protein ARALYDRAFT_919627 [Arabidopsis lyrata subsp. lyrata]
Unigene20465_NAU-LB	969	153	92	38.284	18.2558	-1.06839	Down	1.05523e-08	7.43935e-08	K07304|1|7e-99|358|rcu:RCOM_0017890|peptide-methionine (S)-S-oxide reductase [EC:1.8.4.11]	GO:0031410//cytoplasmic vesicle	GO:0016671//oxidoreductase activity, acting on a sulfur group of donors, disulfide as acceptor	GO:0043412//macromolecule modification	gi|297832444|ref|XP_002884104.1|/3.99798e-122/peptide methionine sulfoxide reductase family protein [Arabidopsis lyrata subsp. lyrata]
CL1930.Contig1_NAU-LB	1717	65	39	9.17894	4.36747	-1.07153	Down	0.000187811	0.000772265	K01177|1|2e-109|394|ppp:PHYPADRAFT_118142|beta-amylase [EC:3.2.1.2]	GO:0009536//plastid	GO:0016160//amylase activity;GO:0043167//ion binding	GO:0005982//starch metabolic process	gi|297793045|ref|XP_002864407.1|/0/beta-amylase 6 [Arabidopsis lyrata subsp. lyrata]
CL9940.Contig1_NAU-LB	2414	202	121	20.2891	9.63794	-1.07391	Down	4.02336e-11	3.49679e-10	K14558|1|7e-41|167|aly:ARALYDRAFT_901180|periodic tryptophan protein 2;K14963|3|2e-11|69.7|ppp:PHYPADRAFT_167543|COMPASS component SWD3	GO:0044464//cell part	GO:0031072//heat shock protein binding	GO:0003006//developmental process involved in reproduction	gi|297830294|ref|XP_002883029.1|/0/hypothetical protein ARALYDRAFT_479149 [Arabidopsis lyrata subsp. lyrata]
CL5177.Contig3_NAU-LB	1347	531	318	95.5821	45.3937	-1.07425	Down	8.9206e-27	1.69708e-25	K01915|1|0.0|726|ath:AT5G37600|glutamine synthetase [EC:6.3.1.2]	GO:0005840//ribosome;GO:0030312//external encapsulating structure;GO:0009526//plastid envelope;GO:0005576//extracellular region;GO:0016020//membrane	GO:0046914//transition metal ion binding;GO:0016211;GO:0032559	GO:0006541//glutamine metabolic process;GO:0042126//nitrate metabolic process;GO:0006970//response to osmotic stress	gi|1526566|dbj|BAA04996.1|/0/glutamine synthetase [Raphanus sativus]
gnl|UG|Rsa#S42007910	706	147	88	50.485	23.967	-1.0748	Down	1.74327e-08	1.20083e-07	K10609|1|1e-77|211|ath:AT5G46210|cullin 4	GO:0043231//intracellular membrane-bounded organelle;GO:0031461//cullin-RING ubiquitin ligase complex	GO:0019899//enzyme binding	GO:0048827//phyllome development;GO:0006259//DNA metabolic process;GO:0009756//carbohydrate mediated signaling;GO:0048572;GO:0009640//photomorphogenesis;GO:0019941//modification-dependent protein catabolic process;GO:0016567//protein ubiquitination;GO:0009793//embryo development ending in seed dormancy	gi|20268719|gb|AAM14063.1|/1.51108e-76/putative cullin [Arabidopsis thaliana]
Unigene14188_NAU-LB	873	443	265	123.038	58.367	-1.07588	Down	1.16932e-22	1.90843e-21	K10575|1|1e-79|294|ath:AT3G55380|ubiquitin-conjugating enzyme E2 G1 [EC:6.3.2.19]	GO:0044464//cell part	GO:0019787//small conjugating protein ligase activity;GO:0032559	GO:0019941//modification-dependent protein catabolic process;GO:0032446//protein modification by small protein conjugation	gi|18410268|ref|NP_567020.1|/1.35379e-78/ubiquitin-conjugating enzyme E2 14 [Arabidopsis thaliana]
Unigene7181_NAU-LB	1715	174	104	24.6	11.6602	-1.07707	Down	8.11114e-10	6.30704e-09	K10609|1|6e-29|127|rcu:RCOM_0632460|cullin 4	GO:0031461//cullin-RING ubiquitin ligase complex	GO:0005488//binding	GO:0048827//phyllome development;GO:0044267//cellular protein metabolic process;GO:0010154//fruit development;GO:0071310//cellular response to organic substance;GO:0009640//photomorphogenesis;GO:0007165//signal transduction	gi|297815872|ref|XP_002875819.1|/1.05014e-74/predicted protein [Arabidopsis lyrata subsp. lyrata]
gnl|UG|Rsa#S43022468	839	164	98	47.3949	22.4595	-1.0774	Down	2.4475e-09	1.83016e-08	K04565|1|2e-79|293|aly:ARALYDRAFT_888118|Cu/Zn superoxide dismutase [EC:1.15.1.1]	GO:0044424//intracellular part	GO:0016209//antioxidant activity;GO:0043169//cation binding;GO:0003824//catalytic activity	GO:0006952//defense response;GO:0006970//response to osmotic stress;GO:0006801//superoxide metabolic process;GO:0010038//response to metal ion	gi|2305111|gb|AAD05576.1|/2.55848e-79/Cu/Zn superoxide dismutase [Raphanus sativus]
Unigene16556_NAU-LB	1461	2379	1420	394.815	186.885	-1.07903	Down	1.13424e-114	8.74494e-113	K03671|1|9e-09|60.1|osa:4342618|thioredoxin 1	GO:0009526//plastid envelope;GO:0031976;GO:0009532//plastid stroma	GO:0005488//binding;GO:0015036//disulfide oxidoreductase activity	GO:0018904;GO:0006950//response to stress;GO:0019725//cellular homeostasis	gi|312282483|dbj|BAJ34107.1|/2.98873e-136/unnamed protein product [Thellungiella halophila]
CL9975.Contig1_NAU-LB	1438	141	84	23.7744	11.232	-1.0818	Down	2.87782e-08	1.94783e-07	K13496|1|9e-94|342|ath:AT2G36780|UDP-glucosyl transferase 73C [EC:2.4.1.-]	GO:0044464//cell part	GO:0035251//UDP-glucosyltransferase activity	GO:0009607//response to biotic stimulus;GO:0051553	gi|18418380|ref|NP_567954.1|/0/UDP-glucosyltransferase 73B2 [Arabidopsis thaliana]
CL7495.Contig1_NAU-LB	1182	183	109	37.539	17.7315	-1.08208	Down	2.5525e-10	2.07322e-09	K04371|1|1e-35|148|vvi:100254083|extracellular signal-regulated kinase 1/2 [EC:2.7.11.24];K09060|2|4e-07|54.3|bdi:100826051|plant G-box-binding factor	GO:0009536//plastid	GO:0001071//nucleic acid binding transcription factor activity;GO:0003677//DNA binding;GO:0046983//protein dimerization activity	GO:0032055//negative regulation of translation in response to stress;GO:0034285;GO:0006351//transcription, DNA-dependent	gi|15236153|ref|NP_195185.1|/3.20515e-50/G-box binding factor 6 [Arabidopsis thaliana]
Unigene4764_NAU-LB	1925	304	181	38.2906	18.0794	-1.08264	Down	3.46416e-16	4.18083e-15	K14685|1|4e-34|144|ppp:PHYPADRAFT_114248|solute carrier family 40 (iron-regulated transporter), member 1	GO:0009526//plastid envelope;GO:0031224//intrinsic to membrane	GO:0022890//inorganic cation transmembrane transporter activity	GO:0006826//iron ion transport;GO:0006875//cellular metal ion homeostasis	gi|22327094|ref|NP_198034.2|/0/iron-regulated protein 3 [Arabidopsis thaliana]
Unigene17785_NAU-LB	2000	768	457	93.1066	43.9362	-1.08347	Down	1.71089e-38	4.58344e-37	-	-	-	-	gi|18403383|ref|NP_566709.1|/0/FRIGIDA-like protein [Arabidopsis thaliana]
CL5422.Contig1_NAU-LB	2199	471	280	51.9332	24.4832	-1.08486	Down	2.69226e-24	4.64783e-23	K01188|1|1e-34|146|vvi:100252705|beta-glucosidase [EC:3.2.1.21];K01238|4|9e-30|130|ath:AT5G24550|[EC:3.2.1.-]	GO:0009527//plastid outer membrane	GO:0043167//ion binding;GO:0008422//beta-glucosidase activity	GO:0009409//response to cold;GO:0044238//primary metabolic process	gi|297829188|ref|XP_002882476.1|/0/hypothetical protein ARALYDRAFT_477956 [Arabidopsis lyrata subsp. lyrata]
CL37.Contig2_NAU-LB	1193	165	98	33.5346	15.7951	-1.08617	Down	1.71298e-09	1.29962e-08	K10599|1|1e-169|594|aly:ARALYDRAFT_887618|pre-mRNA-processing factor 19 [EC:6.3.2.19]	GO:0031461//cullin-RING ubiquitin ligase complex;GO:0030312//external encapsulating structure;GO:0009536//plastid;GO:0031981//nuclear lumen	GO:0005488//binding;GO:0019787//small conjugating protein ligase activity	GO:0006952//defense response;GO:0032446//protein modification by small protein conjugation;GO:0010038//response to metal ion	gi|297843258|ref|XP_002889510.1|/1.32012e-168/transducin family protein [Arabidopsis lyrata subsp. lyrata]
Unigene4036_NAU-LB	2597	128	76	11.9505	5.62701	-1.08663	Down	1.12276e-07	7.12481e-07	K13416|1|7e-56|217|rcu:RCOM_1534760|brassinosteroid insensitive 1-associated receptor kinase 1 [EC:2.7.10.1 2.7.11.1];K04733|4|6e-55|214|smo:SELMODRAFT_159261|interleukin-1 receptor-associated kinase 4 [EC:2.7.11.1];K13418|5|6e-55|214|rcu:RCOM_0186340|somatic embryogenesis receptor kinase 1 [EC:2.7.10.1 2.7.11.1]	GO:0016020//membrane	GO:0030246//carbohydrate binding;GO:0004672//protein kinase activity;GO:0032559	GO:0006464//cellular protein modification process;GO:0008037//cell recognition	gi|15218576|ref|NP_174690.1|/0/lectin protein kinase-like protein [Arabidopsis thaliana]
gi|161522055|gb|EY899928.1|EY899928	601	145	86	58.4983	27.5144	-1.08821	Down	1.56553e-08	1.08552e-07	K01623|1|2e-87|319|ath:AT2G21330|fructose-bisphosphate aldolase, class I [EC:4.1.2.13]	GO:0005840//ribosome;GO:0009526//plastid envelope;GO:0009570//chloroplast stroma;GO:0005576//extracellular region;GO:0044436	GO:0016832//aldehyde-lyase activity	GO:0006007//glucose catabolic process;GO:0010038//response to metal ion;GO:0009725//response to hormone stimulus	gi|312281829|dbj|BAJ33780.1|/3.01238e-87/unnamed protein product [Thellungiella halophila]
CL5684.Contig1_NAU-LB	1775	103	61	14.0698	6.60796	-1.09033	Down	1.82766e-06	1.00812e-05	K03018|1|6e-76|283|zma:100501057|DNA-directed RNA polymerase III subunit RPC1 [EC:2.7.7.6];K03006|2|1e-09|63.5|sbi:SORBI_05g019520|DNA-directed RNA polymerase II subunit RPB1 [EC:2.7.7.6]	GO:0044451//nucleoplasm part	GO:0003676//nucleic acid binding;GO:0046914//transition metal ion binding;GO:0034062//RNA polymerase activity;GO:0016641//oxidoreductase activity, acting on the CH-NH2 group of donors, oxygen as acceptor;GO:0048037//cofactor binding	GO:0006342//chromatin silencing;GO:0007154//cell communication;GO:0016246//RNA interference	gi|297837119|ref|XP_002886441.1|/0/NRPD1a [Arabidopsis lyrata subsp. lyrata]
Unigene19525_NAU-LB	1113	201	119	43.7875	20.5583	-1.0908	Down	2.5326e-11	2.23503e-10	K10525|1|2e-97|354|aly:ARALYDRAFT_334627|allene oxide cyclase [EC:5.3.99.6]	GO:0009526//plastid envelope;GO:0009532//plastid stroma;GO:0031090//organelle membrane;GO:0009534//chloroplast thylakoid	GO:0009975//cyclase activity	GO:0009414//response to water deprivation;GO:0006970//response to osmotic stress;GO:0051707//response to other organism	gi|157849770|gb|ABV89668.1|/2.81335e-101/ERD12 protein [Brassica rapa]
Unigene793_NAU-LB	2409	71	42	7.14613	3.35234	-1.09199	Down	7.34932e-05	0.000321813	K01689|1|0.0|887|ath:AT2G29560|enolase [EC:4.2.1.11]	GO:0043234//protein complex;GO:0043231//intracellular membrane-bounded organelle	GO:0046872//metal ion binding;GO:0016836//hydro-lyase activity	GO:0006007//glucose catabolic process	gi|15227561|ref|NP_180516.1|/0/cytosolic enolase [Arabidopsis thaliana]
Unigene5810_NAU-LB	1650	383	226	56.2813	26.3367	-1.09558	Down	2.36038e-20	3.51584e-19	K00924|1|0.0|789|ath:AT4G28880|[EC:2.7.1.-];K02218|3|1e-141|501|vvi:100244694|casein kinase 1 [EC:2.7.11.1]	GO:0043231//intracellular membrane-bounded organelle	GO:0004672//protein kinase activity;GO:0032559	GO:0006464//cellular protein modification process	gi|22329010|ref|NP_194617.2|/0/protein casein kinase I-like 3 [Arabidopsis thaliana]
CL3134.Contig2_NAU-LB	1050	100	59	23.0919	10.8044	-1.09578	Down	2.35154e-06	1.27308e-05	K11290|1|4e-107|386|aly:ARALYDRAFT_889308|template-activating factor I	GO:0043231//intracellular membrane-bounded organelle	GO:0003676//nucleic acid binding;GO:0005515//protein binding	GO:0010102//lateral root morphogenesis;GO:0048869//cellular developmental process;GO:0051707//response to other organism;GO:0010038//response to metal ion;GO:0009755//hormone-mediated signaling pathway;GO:0034728//nucleosome organization;GO:0006950//response to stress	gi|6730705|gb|AAF27100.1|AC011809_9/5.3489e-107/Putative phospatase 2A inhibitor [Arabidopsis thaliana]
CL4691.Contig2_NAU-LB	843	63	37	18.1202	8.43937	-1.10239	Down	0.000168029	0.000693898	K00898|1|3e-132|469|aly:ARALYDRAFT_896779|pyruvate dehydrogenase kinase [EC:2.7.11.2]	GO:0043231//intracellular membrane-bounded organelle	GO:0004871//signal transducer activity;GO:0004673//protein histidine kinase activity;GO:0032559	GO:0006468//protein phosphorylation;GO:0007165//signal transduction	gi|75706632|gb|ABA25867.1|/1.58683e-137/mitochondrial pyruvate dehydrogenase kinase [Brassica napus]
CL245.Contig1_NAU-LB	1660	138	81	20.1567	9.38238	-1.10324	Down	2.43454e-08	1.65911e-07	K09503|1|0.0|729|aly:ARALYDRAFT_905503|DnaJ homolog subfamily A member 2	GO:0016020//membrane;GO:0044424//intracellular part	GO:0043169//cation binding;GO:0005515//protein binding;GO:0032559	GO:0006950//response to stress;GO:0044267//cellular protein metabolic process	gi|297818872|ref|XP_002877319.1|/0/hypothetical protein ARALYDRAFT_905503 [Arabidopsis lyrata subsp. lyrata]
CL9334.Contig1_NAU-LB	1506	225	132	36.2249	16.8533	-1.10395	Down	1.01596e-12	9.93778e-12	K03064|1|0.0|714|ath:AT5G43010|26S proteasome regulatory subunit T4	GO:0030312//external encapsulating structure;GO:0031981//nuclear lumen;GO:0005838//proteasome regulatory particle;GO:0016020//membrane	GO:0042623//ATPase activity, coupled;GO:0032559	GO:0019941//modification-dependent protein catabolic process	gi|15239140|ref|NP_199115.1|/0/regulatory particle triple-A ATPase 4A [Arabidopsis thaliana]
Unigene18658_NAU-LB	1680	474	278	68.4098	31.8179	-1.10436	Down	4.08868e-25	7.31057e-24	K10592|1|0.0|914|aly:ARALYDRAFT_684483|E3 ubiquitin-protein ligase HUWE1 [EC:6.3.2.19]	GO:0044464//cell part	GO:0016879//ligase activity, forming carbon-nitrogen bonds	GO:0043412//macromolecule modification	gi|297792245|ref|XP_002864007.1|/0/predicted protein [Arabidopsis lyrata subsp. lyrata]
CL2249.Contig1_NAU-LB	1885	1117	655	143.678	66.8138	-1.10462	Down	6.6492e-57	2.55794e-55	K14272|1|0.0|932|aly:ARALYDRAFT_472589|glutamate--glyoxylate aminotransferase [EC:2.6.1.4 2.6.1.2 2.6.1.44 2.6.1.-]	GO:0005618//cell wall;GO:0009532//plastid stroma;GO:0042579//microbody;GO:0005576//extracellular region	GO:0016755;GO:0047635;GO:0016846//carbon-sulfur lyase activity;GO:0048037//cofactor binding	GO:0006749//glutathione metabolic process;GO:0008652//cellular amino acid biosynthetic process;GO:0043094;GO:0006950//response to stress	gi|30688330|ref|NP_564192.2|/0/glutamate:glyoxylate aminotransferase [Arabidopsis thaliana]
Unigene16570_NAU-LB	1011	99	58	23.7429	11.031	-1.10594	Down	2.21992e-06	1.20429e-05	K12619|1|5e-50|196|ath:AT1G75660|5'-3' exoribonuclease 2 [EC:3.1.13.-]	GO:0043231//intracellular membrane-bounded organelle	GO:0046914//transition metal ion binding;GO:0008409//5'-3' exonuclease activity	GO:0010586//miRNA metabolic process	gi|18410905|ref|NP_565114.1|/6.31377e-49/5'-3' exoribonuclease 3 [Arabidopsis thaliana]
CL6535.Contig1_NAU-LB	2211	350	205	38.3821	17.8279	-1.10629	Down	5.21614e-19	7.2836e-18	K01528|1|9e-83|306|osa:4327743|dynamin GTPase [EC:3.6.5.5]	GO:0015630//microtubule cytoskeleton;GO:0031090//organelle membrane;GO:0009534//chloroplast thylakoid	GO:0032561//guanyl ribonucleotide binding;GO:0017111//nucleoside-triphosphatase activity;GO:0019901//protein kinase binding	GO:0003006//developmental process involved in reproduction;GO:0009207;GO:0003002//regionalization;GO:0000904//cell morphogenesis involved in differentiation;GO:0006897//endocytosis;GO:0000919//cell plate assembly	gi|20453081|gb|AAM19784.1|/0/AT5g42080/MJC20_19 [Arabidopsis thaliana]
Unigene14617_NAU-LB	1809	70	41	9.38229	4.35794	-1.10629	Down	6.9371e-05	0.000304314	K13754|1|0.0|704|gmx:100796101|solute carrier family 24 (sodium/potassium/calcium exchanger), member 6	GO:0031224//intrinsic to membrane;GO:0043231//intracellular membrane-bounded organelle;GO:0012506//vesicle membrane	GO:0046873//metal ion transmembrane transporter activity;GO:0022890//inorganic cation transmembrane transporter activity;GO:0015298//solute:cation antiporter activity	GO:0009651//response to salt stress;GO:0006828//manganese ion transport;GO:0035725//sodium ion transmembrane transport;GO:0006873//cellular ion homeostasis	gi|18404796|ref|NP_564650.1|/0/cation/calcium exchanger 4 [Arabidopsis thaliana]
Unigene19855_NAU-LB	935	229	134	59.3845	27.5568	-1.10768	Down	5.54412e-13	5.51426e-12	K02836|1|5e-12|70.1|ppp:PHYPADRAFT_145938|peptide chain release factor 2;K02835|2|2e-10|64.7|vcn:VOLCADRAFT_101339|peptide chain release factor 1	GO:0009536//plastid	GO:0008079//translation termination factor activity	GO:0006412//translation	gi|30692851|ref|NP_174601.2|/2.76266e-80/Class I peptide chain release factor [Arabidopsis thaliana]
CL4977.Contig1_NAU-LB	1388	1081	632	188.836	87.5515	-1.10893	Down	1.81655e-55	6.82758e-54	K00051|1|0.0|709|aly:ARALYDRAFT_495948|malate dehydrogenase (NADP+) [EC:1.1.1.82]	GO:0009532//plastid stroma;GO:0009526//plastid envelope;GO:0005576//extracellular region	GO:0016615//malate dehydrogenase activity	GO:0006007//glucose catabolic process;GO:0043648//dicarboxylic acid metabolic process;GO:0009060//aerobic respiration	gi|312281617|dbj|BAJ33674.1|/0/unnamed protein product [Thellungiella halophila]
CL4893.Contig3_NAU-LB	1581	65	38	9.96853	4.62155	-1.109	Down	0.000122607	0.000513418	K03241|1|0.0|821|aly:ARALYDRAFT_488841|translation initiation factor eIF-2B subunit gamma	GO:0044464//cell part	GO:0016772//transferase activity, transferring phosphorus-containing groups;GO:0016747//transferase activity, transferring acyl groups other than amino-acyl groups;GO:0008135//translation factor activity, nucleic acid binding	GO:0006412//translation	gi|297812131|ref|XP_002873949.1|/0/acyltransferase [Arabidopsis lyrata subsp. lyrata]
CL3222.Contig1_NAU-LB	975	327	191	81.3191	37.6673	-1.11028	Down	5.87304e-18	7.81605e-17	K02732|1|2e-121|433|aly:ARALYDRAFT_907612|20S proteasome subunit beta 6 [EC:3.4.25.1]	GO:0000502//proteasome complex;GO:0016020//membrane;GO:0009536//plastid	GO:0004175//endopeptidase activity	GO:0019941//modification-dependent protein catabolic process;GO:0050832//defense response to fungus	gi|600387|emb|CAA47753.1|/3.41886e-121/proteosome subunit [Arabidopsis thaliana]
Unigene19697_NAU-LB	1321	125	73	22.9433	10.6257	-1.11052	Down	9.46486e-08	6.04275e-07	K12591|1|3e-07|54.7|smo:SELMODRAFT_95804|exosome complex exonuclease RRP6 [EC:3.1.13.-]	GO:0044464//cell part	GO:0003676//nucleic acid binding;GO:0004527//exonuclease activity	GO:0034641//cellular nitrogen compound metabolic process	gi|297825683|ref|XP_002880724.1|/0/hypothetical protein ARALYDRAFT_481448 [Arabidopsis lyrata subsp. lyrata]
CL2795.Contig1_NAU-LB	2278	168	98	17.8815	8.27196	-1.11217	Down	5.7982e-10	4.56992e-09	K15542|1|0.0|941|ath:AT5G13480|polyadenylation factor subunit 2	GO:0031461//cullin-RING ubiquitin ligase complex	GO:0005488//binding;GO:0004468//lysine N-acetyltransferase activity	GO:0009908//flower development	gi|79512802|ref|NP_196852.3|/0/Flowering time control protein FY [Arabidopsis thaliana]
CL1048.Contig1_NAU-LB	1631	84	49	12.4875	5.77668	-1.11217	Down	1.19711e-05	5.94532e-05	K03754|1|0.0|693|aly:ARALYDRAFT_478051|translation initiation factor eIF-2B subunit beta	GO:0043234//protein complex	GO:0008135//translation factor activity, nucleic acid binding;GO:0032561//guanyl ribonucleotide binding	GO:0006412//translation	gi|297833516|ref|XP_002884640.1|/0/eukaryotic translation initiation factor 2B family protein [Arabidopsis lyrata subsp. lyrata]
gi|154094718|gb|EV527691.1|EV527691	869	67	39	18.6941	8.62941	-1.11525	Down	8.94752e-05	0.000387401	K05016|1|4e-86|293|aly:ARALYDRAFT_910703|chloride channel 7	GO:0031224//intrinsic to membrane;GO:0044431//Golgi apparatus part	GO:0005254//chloride channel activity	GO:0010035//response to inorganic substance;GO:0000902//cell morphogenesis;GO:0015698//inorganic anion transport;GO:0006873//cellular ion homeostasis	gi|15240276|ref|NP_197996.1|/5.2724e-86/chloride channel protein CLC-d [Arabidopsis thaliana]
Unigene46_NAU-LB	958	67	39	16.9574	7.82772	-1.11525	Down	8.94752e-05	0.000387431	K10355|1|5e-145|511|ath:AT3G53750|actin, other eukaryote;K05692|3|2e-140|496|pop:POPTR_561252|actin beta/gamma 1	GO:0043232;GO:0043231//intracellular membrane-bounded organelle;GO:0016020//membrane;GO:0030312//external encapsulating structure	GO:0032559	GO:0048588//developmental cell growth;GO:0006996//organelle organization	gi|20197249|gb|AAC23632.2|/6.2421e-144/actin 3 [Arabidopsis thaliana]
gnl|UG|Rsa#S42014380	907	62	36	16.5742	7.63188	-1.11883	Down	0.000158245	0.000656369	K02729|1|2e-106|383|aly:ARALYDRAFT_478846|20S proteasome subunit alpha 5 [EC:3.4.25.1]	GO:0005840//ribosome;GO:0005839//proteasome core complex;GO:0031090//organelle membrane;GO:0043231//intracellular membrane-bounded organelle	GO:0004175//endopeptidase activity;GO:0004518//nuclease activity	GO:0019941//modification-dependent protein catabolic process;GO:0010038//response to metal ion	gi|297829986|ref|XP_002882875.1|/2.3487e-105/hypothetical protein ARALYDRAFT_478846 [Arabidopsis lyrata subsp. lyrata]
gi|161573947|gb|EY944422.1|EY944422	741	62	36	20.2872	9.34158	-1.11883	Down	0.000158245	0.000656467	K06268|1|4e-97|352|ath:AT5G55990|protein phosphatase 3, regulatory subunit	GO:0000325//plant-type vacuole;GO:0005840//ribosome;GO:0031012//extracellular matrix	GO:0046872//metal ion binding	GO:0019932//second-messenger-mediated signaling	gi|15241101|ref|NP_200410.1|/5.41343e-96/calcineurin B-like protein 2 [Arabidopsis thaliana]
CL5928.Contig1_NAU-LB	1077	8348	4847	1879.39	865.353	-1.1189	Down	0	0	K08907|1|8e-131|464|aly:ARALYDRAFT_485905|light-harvesting complex I chlorophyll a/b binding protein 1	GO:0031224//intrinsic to membrane;GO:0009521;GO:0009526//plastid envelope;GO:0009534//chloroplast thylakoid;GO:0009570//chloroplast stroma	GO:0043169//cation binding;GO:0046906//tetrapyrrole binding	GO:0009765//photosynthesis, light harvesting;GO:0009639//response to red or far red light;GO:0006464//cellular protein modification process	gi|312282193|dbj|BAJ33962.1|/4.23126e-131/unnamed protein product [Thellungiella halophila]
CL2261.Contig10_NAU-LB	3375	100	58	7.18415	3.30438	-1.12044	Down	1.53404e-06	8.51734e-06	-	GO:0043231//intracellular membrane-bounded organelle	-	GO:0007623//circadian rhythm	gi|297830956|ref|XP_002883360.1|/0/time for coffee [Arabidopsis lyrata subsp. lyrata]
Unigene7534_NAU-LB	6621	388	225	14.2088	6.53424	-1.12069	Down	2.58672e-21	3.99648e-20	K09533|1|0.0|2437|smo:SELMODRAFT_165973|DnaJ homolog subfamily C member 13;K09517|3|6e-06|53.1|bdi:100836952|DnaJ homolog subfamily B member 11	GO:0005768//endosome;GO:0031090//organelle membrane;GO:0044431//Golgi apparatus part	GO:0005515//protein binding	GO:0016192//vesicle-mediated transport;GO:0044267//cellular protein metabolic process;GO:0006605//protein targeting;GO:0009657//plastid organization;GO:0009630//gravitropism;GO:0003006//developmental process involved in reproduction;GO:0006950//response to stress	gi|42569365|ref|NP_180257.3|/0/DNAJ heat shock N-terminal domain-containing protein [Arabidopsis thaliana]
Unigene10680_NAU-LB	1073	69	40	15.5919	7.16797	-1.12116	Down	6.53042e-05	0.000287586	K14484|1|8e-41|166|ath:AT1G04550|auxin-responsive protein IAA	GO:0043231//intracellular membrane-bounded organelle	GO:0001071//nucleic acid binding transcription factor activity;GO:0005515//protein binding	GO:0009755//hormone-mediated signaling pathway	gi|145334159|ref|NP_001078460.1|/1.46149e-99/auxin-responsive protein IAA11 [Arabidopsis thaliana]
Unigene61_NAU-LB	979	69	40	17.089	7.85622	-1.12116	Down	6.53042e-05	0.000287609	K04508|1|5e-21|100|ota:Ot11g00870|transducin (beta)-like 1	GO:0043234//protein complex	GO:0004683//calmodulin-dependent protein kinase activity;GO:0043566//structure-specific DNA binding	GO:0006355//regulation of transcription, DNA-dependent;GO:0009791//post-embryonic development;GO:0015031//protein transport	gi|18403052|ref|NP_565749.1|/4.81688e-107/leunig-like protein [Arabidopsis thaliana]
Unigene15359_NAU-LB	1148	76	44	16.0517	7.36965	-1.12306	Down	2.70696e-05	0.000126996	K14007|1|5e-134|475|ath:AT4G32640|protein transport protein SEC24	GO:0012507//ER to Golgi transport vesicle membrane	GO:0046914//transition metal ion binding	GO:0048193//Golgi vesicle transport;GO:0006950//response to stress;GO:0015031//protein transport	gi|443609449|dbj|BAM76809.1|/6.51502e-133/Sec24-like transport protein [Arabidopsis thaliana]
Unigene767_NAU-LB	1657	152	88	22.2418	10.2117	-1.12306	Down	2.85402e-09	2.12102e-08	K12852|1|0.0|912|ath:AT1G06220|116 kDa U5 small nuclear ribonucleoprotein component	GO:0032991//macromolecular complex;GO:0030312//external encapsulating structure;GO:0016604//nuclear body;GO:0016020//membrane	GO:0017111//nucleoside-triphosphatase activity;GO:0003723//RNA binding;GO:0032561//guanyl ribonucleotide binding	GO:0045595//regulation of cell differentiation;GO:0009207;GO:0003006//developmental process involved in reproduction	gi|15221423|ref|NP_172112.1|/0/U5 small nuclear ribonucleoprotein component [Arabidopsis thaliana]
Unigene13457_NAU-LB	1812	534	309	71.455	32.7896	-1.1238	Down	7.54688e-29	1.52888e-27	K02261|1|7e-86|301|aly:ARALYDRAFT_356389|cytochrome c oxidase subunit 2	GO:0019866//organelle inner membrane;GO:0043231//intracellular membrane-bounded organelle;GO:0031224//intrinsic to membrane	GO:0005506//iron ion binding;GO:0015002//heme-copper terminal oxidase activity	GO:0051234//establishment of localization;GO:0022900//electron transport chain	gi|157102082|gb|ABV23661.1|/8.80709e-96/cytochrome oxidase subunit 2 [Boehmeria nivea]
CL7496.Contig1_NAU-LB	1619	90	52	13.4786	6.17579	-1.12598	Down	4.70042e-06	2.44747e-05	K01412|1|0.0|873|aly:ARALYDRAFT_896168|mitochondrial processing peptidase [EC:3.4.24.64]	GO:0030312//external encapsulating structure;GO:0005746//mitochondrial respiratory chain;GO:0031981//nuclear lumen;GO:0009536//plastid	GO:0004175//endopeptidase activity;GO:0046914//transition metal ion binding	GO:0019538//protein metabolic process	gi|15232845|ref|NP_186858.1|/0/mitochondrial processing peptidase [Arabidopsis thaliana]
Unigene5073_NAU-LB	2330	97	56	10.094	4.62134	-1.12712	Down	1.96702e-06	1.07327e-05	K07870|1|0.0|1022|ath:AT3G63150|Ras homolog gene family, member T1	GO:0031966//mitochondrial membrane	GO:0046872//metal ion binding;GO:0032561//guanyl ribonucleotide binding;GO:0003824//catalytic activity	GO:0035556//intracellular signal transduction;GO:0009725//response to hormone stimulus;GO:0009207;GO:0034643//establishment of mitochondrion localization, microtubule-mediated	gi|18412634|ref|NP_567139.1|/0/MIRO-related GTP-ase 2 [Arabidopsis thaliana]
CL1610.Contig1_NAU-LB	1863	248	143	32.2766	14.7591	-1.12889	Down	2.51118e-14	2.71848e-13	K00654|1|0.0|934|ath:AT3G48780|serine palmitoyltransferase [EC:2.3.1.50]	GO:0043231//intracellular membrane-bounded organelle	GO:0048037//cofactor binding;GO:0016454	GO:0006670//sphingosine metabolic process;GO:0009639//response to red or far red light;GO:0048229//gametophyte development	gi|159506873|gb|ABW97708.1|/0/serine palmitoyltransferase long chain base subunit [Brassica rapa subsp. chinensis]
CL3026.Contig2_NAU-LB	2103	177	102	20.4072	9.32603	-1.12974	Down	1.18465e-10	9.88788e-10	K04354|1|0.0|904|aly:ARALYDRAFT_471984|protein phosphatase 2 (formerly 2A), regulatory subunit B	GO:0008287//protein serine/threonine phosphatase complex	GO:0019888//protein phosphatase regulator activity	GO:0006464//cellular protein modification process;GO:0023052//signaling	gi|30685484|ref|NP_849681.1|/0/Protein phosphatase 2A, regulatory subunit PR55 [Arabidopsis thaliana]
CL2.Contig4_NAU-LB	1820	92	53	12.2565	5.59939	-1.1302	Down	3.4421e-06	1.83437e-05	K13044|1|3e-20|98.6|zma:100382653|heterogeneous nuclear ribonucleoprotein A/B/D;K14411|3|1e-19|96.7|sbi:SORBI_05g025410|RNA-binding protein Musashi	GO:0043231//intracellular membrane-bounded organelle	GO:0003723//RNA binding	GO:0009692;GO:0009755//hormone-mediated signaling pathway;GO:0043488//regulation of mRNA stability;GO:0010260//organ senescence;GO:0006950//response to stress	gi|312281743|dbj|BAJ33737.1|/4.18216e-154/unnamed protein product [Thellungiella halophila]
gi|154171374|gb|EV542648.1|EV542648	925	125	72	32.7656	14.9667	-1.13042	Down	6.15814e-08	4.01837e-07	K06889|1|6e-34|142|vvi:100245712|	GO:0043231//intracellular membrane-bounded organelle	GO:0046914//transition metal ion binding;GO:0042393//histone binding;GO:0003824//catalytic activity;GO:0032559	GO:0006351//transcription, DNA-dependent	gi|356564164|ref|XP_003550326.1|/2.38025e-63/PREDICTED: PHD finger protein Alfin1-like isoform 2 [Glycine max]
gi|167444920|gb|FD950828.1|FD950828	732	66	38	21.8616	9.98179	-1.13103	Down	8.40778e-05	0.000366257	K12581|1|4e-118|421|ath:AT1G80780|CCR4-NOT transcription complex subunit 7/8	GO:0043231//intracellular membrane-bounded organelle	GO:0000175//3'-5'-exoribonuclease activity;GO:0005488//binding	GO:0016070//RNA metabolic process	gi|75336904|sp|Q9SAI2.1|CAF1F_ARATH/5.47417e-117/RecName: Full=Probable CCR4-associated factor 1 homolog 6
CL7837.Contig2_NAU-LB	2764	879	506	77.1081	35.2005	-1.13129	Down	7.114e-47	2.28854e-45	K01115|1|0.0|1555|ath:AT3G15730|phospholipase D [EC:3.1.4.4]	GO:0030135//coated vesicle;GO:0009526//plastid envelope;GO:0016020//membrane	GO:0004620//phospholipase activity;GO:0046872//metal ion binding;GO:0035091//phosphatidylinositol binding	GO:0010118//stomatal movement;GO:0010038//response to metal ion;GO:0032787//monocarboxylic acid metabolic process;GO:0006650//glycerophospholipid metabolic process;GO:0032501//multicellular organismal process;GO:0009738//abscisic acid mediated signaling pathway	gi|13124446|sp|P55939.2|PLDA2_BRAOC/0/RecName: Full=Phospholipase D alpha 2; Short=PLD 2; AltName: Full=Choline phosphatase 2; AltName: Full=Phosphatidylcholine-hydrolyzing phospholipase D 2; Flags: Precursor
Unigene19201_NAU-LB	2147	3030	1744	342.184	156.189	-1.13148	Down	4.58624e-157	4.7832e-155	K00131|1|0.0|937|aly:ARALYDRAFT_481283|glyceraldehyde-3-phosphate dehydrogenase (NADP) [EC:1.2.1.9]	GO:0044424//intracellular part	GO:0005488//binding	GO:0008152//metabolic process	gi|312282657|dbj|BAJ34194.1|/0/unnamed protein product [Thellungiella halophila]
CL527.Contig1_NAU-LB	1591	120	69	18.2878	8.33902	-1.13293	Down	1.07206e-07	6.80541e-07	K11647|1|8e-102|369|pop:POPTR_799056|SWI/SNF-related matrix-associated actin-dependent regulator of chromatin subfamily A member 2/4 [EC:3.6.4.-]	GO:0043231//intracellular membrane-bounded organelle;GO:0043234//protein complex;GO:0044444//cytoplasmic part	GO:0017111//nucleoside-triphosphatase activity;GO:0003676//nucleic acid binding;GO:0032559	GO:0010160//formation of organ boundary;GO:0010468//regulation of gene expression;GO:0006338//chromatin remodeling	gi|297824661|ref|XP_002880213.1|/1.33767e-169/ATBRM/CHR2 [Arabidopsis lyrata subsp. lyrata]
CL4486.Contig1_NAU-LB	2491	101	58	9.83099	4.47703	-1.13479	Down	1.05648e-06	5.96232e-06	K14007|1|1e-24|113|bdi:100839661|protein transport protein SEC24	GO:0012507//ER to Golgi transport vesicle membrane	GO:0046914//transition metal ion binding	GO:0048193//Golgi vesicle transport;GO:0015031//protein transport	gi|297822415|ref|XP_002879090.1|/0/sec23/sec24 transport family protein [Arabidopsis lyrata subsp. lyrata]
CL7242.Contig2_NAU-LB	1523	155	89	24.6764	11.2364	-1.13495	Down	1.45187e-09	1.10726e-08	K00162|1|0.0|661|ath:AT5G50850|pyruvate dehydrogenase E1 component subunit beta [EC:1.2.4.1]	GO:0031981//nuclear lumen;GO:0031090//organelle membrane	GO:0016616//oxidoreductase activity, acting on the CH-OH group of donors, NAD or NADP as acceptor;GO:0004738//pyruvate dehydrogenase activity;GO:0000166//nucleotide binding;GO:0048037//cofactor binding	GO:0006007//glucose catabolic process;GO:0006952//defense response	gi|312282681|dbj|BAJ34206.1|/0/unnamed protein product [Thellungiella halophila]
CL3498.Contig1_NAU-LB	1568	204	117	31.5452	14.3475	-1.13662	Down	3.6566e-12	3.45105e-11	K01090|1|3e-180|629|ath:AT2G25070|protein phosphatase [EC:3.1.3.16]	GO:0043234//protein complex;GO:0016020//membrane	GO:0043169//cation binding;GO:0004721//phosphoprotein phosphatase activity	GO:0009725//response to hormone stimulus;GO:0006464//cellular protein modification process	gi|312283169|dbj|BAJ34450.1|/0/unnamed protein product [Thellungiella halophila]
Unigene15321_NAU-LB	1546	211	121	33.092	15.0492	-1.1368	Down	1.5593e-12	1.50774e-11	K02575|1|7e-121|432|rcu:RCOM_0023970|MFS transporter, NNP family, nitrate/nitrite transporter	GO:0000325//plant-type vacuole	GO:0015103//inorganic anion transmembrane transporter activity	GO:0015698//inorganic anion transport	gi|15241440|ref|NP_196961.1|/0/high affinity nitrate transporter 2.7 [Arabidopsis thaliana]
Unigene21647_NAU-LB	2863	225	129	19.0551	8.66372	-1.13712	Down	2.83986e-13	2.87812e-12	K10143|1|1e-164|578|ppp:PHYPADRAFT_126406|E3 ubiquitin-protein ligase RFWD2 [EC:6.3.2.19]	GO:0043231//intracellular membrane-bounded organelle;GO:0031234//extrinsic to internal side of plasma membrane;GO:0031461//cullin-RING ubiquitin ligase complex	GO:0005515//protein binding;GO:0016301//kinase activity;GO:0032559	GO:0048573//photoperiodism, flowering;GO:0048572;GO:0009640//photomorphogenesis;GO:0007602//phototransduction;GO:0006464//cellular protein modification process	gi|30690337|ref|NP_182157.2|/0/protein SUPPRESSOR OF PHYA-105 1 [Arabidopsis thaliana]
CL5809.Contig2_NAU-LB	1373	107	61	18.8957	8.5427	-1.14529	Down	4.15892e-07	2.4766e-06	K14510|1|1e-41|169|rcu:RCOM_0382890|serine/threonine-protein kinase CTR1 [EC:2.7.11.1]	GO:0043231//intracellular membrane-bounded organelle;GO:0044444//cytoplasmic part	GO:0004672//protein kinase activity;GO:0032559	GO:0006464//cellular protein modification process	gi|297844550|ref|XP_002890156.1|/0/kinase family protein [Arabidopsis lyrata subsp. lyrata]
CL8321.Contig4_NAU-LB	1163	107	61	22.3076	10.0852	-1.14529	Down	4.15892e-07	2.47713e-06	K13947|1|2e-116|417|ath:AT1G70940|auxin efflux carrier family	GO:0031224//intrinsic to membrane;GO:0044459//plasma membrane part;GO:0012505//endomembrane system	GO:0015562//efflux transmembrane transporter activity;GO:0015294//solute:cation symporter activity	GO:0060918//auxin transport;GO:0048588//developmental cell growth;GO:0009606//tropism;GO:0010015//root morphogenesis;GO:0000578//embryonic axis specification;GO:0009734//auxin mediated signaling pathway;GO:0000904//cell morphogenesis involved in differentiation	gi|15485153|emb|CAC67457.1|/6.605e-125/efflux carrier, pin2 [Brassica juncea]
CL245.Contig2_NAU-LB	1631	86	49	12.7848	5.77668	-1.14612	Down	5.64948e-06	2.92656e-05	K09503|1|0.0|739|aly:ARALYDRAFT_905503|DnaJ homolog subfamily A member 2	GO:0016020//membrane;GO:0044424//intracellular part	GO:0043169//cation binding;GO:0005515//protein binding;GO:0032559	GO:0006950//response to stress;GO:0044267//cellular protein metabolic process	gi|297818872|ref|XP_002877319.1|/0/hypothetical protein ARALYDRAFT_905503 [Arabidopsis lyrata subsp. lyrata]
CL2573.Contig3_NAU-LB	818	79	45	23.4166	10.5778	-1.14649	Down	1.35495e-05	6.6673e-05	K03627|1|2e-62|236|aly:ARALYDRAFT_907349|putative transcription factor	GO:0031981//nuclear lumen	GO:0003712//transcription cofactor activity;GO:0003677//DNA binding	GO:0009725//response to hormone stimulus;GO:0006355//regulation of transcription, DNA-dependent	gi|297817180|ref|XP_002876473.1|/3.00108e-61/ATMBF1B/MBF1B [Arabidopsis lyrata subsp. lyrata]
CL679.Contig1_NAU-LB	1678	1863	1061	269.197	121.579	-1.14677	Down	1.99775e-99	1.3396e-97	K09286|1|2e-94|345|aly:ARALYDRAFT_476975|EREBP-like factor	GO:0043231//intracellular membrane-bounded organelle	GO:0003676//nucleic acid binding;GO:0001071//nucleic acid binding transcription factor activity	GO:0009314//response to radiation;GO:0000160//two-component signal transduction system (phosphorelay);GO:0009651//response to salt stress;GO:0010467//gene expression	gi|312282331|dbj|BAJ34031.1|/4.39026e-102/unnamed protein product [Thellungiella halophila]
CL2614.Contig1_NAU-LB	3281	58	33	4.28619	1.93394	-1.14815	Down	0.000191186	0.000785559	K10754|1|0.0|1322|aly:ARALYDRAFT_489049|replication factor C subunit 1	GO:0005657//replication fork	GO:0016462//pyrophosphatase activity;GO:0032559;GO:0003677//DNA binding	GO:0031060//regulation of histone methylation;GO:0006259//DNA metabolic process;GO:0006342//chromatin silencing;GO:0033554//cellular response to stress;GO:0009725//response to hormone stimulus	gi|312282245|dbj|BAJ33988.1|/0/unnamed protein product [Thellungiella halophila]
Unigene16489_NAU-LB	1502	58	33	9.36284	4.22455	-1.14815	Down	0.000191186	0.000785675	K01188|1|0.0|956|ath:AT1G26560|beta-glucosidase [EC:3.2.1.21]	GO:0005576//extracellular region;GO:0009536//plastid	GO:0043167//ion binding;GO:0015926//glucosidase activity	GO:0044238//primary metabolic process	gi|15222734|ref|NP_173978.1|/0/beta glucosidase 40 [Arabidopsis thaliana]
CL896.Contig2_NAU-LB	654	58	33	21.503	9.70225	-1.14815	Down	0.000191186	0.000785791	-	-	-	-	gi|18394486|ref|NP_564024.1|/1.42043e-51/protein ELF4-like 4 [Arabidopsis thaliana]
CL3560.Contig2_NAU-LB	1671	350	199	50.7857	22.8988	-1.14915	Down	4.05564e-20	5.9611e-19	K03453|1|4e-172|602|aly:ARALYDRAFT_901497|bile acid:Na+ symporter, BASS family	GO:0009526//plastid envelope;GO:0031224//intrinsic to membrane	GO:0005343//organic acid:sodium symporter activity	GO:0006820//anion transport;GO:0030001//metal ion transport	gi|312281731|dbj|BAJ33731.1|/4.28952e-174/unnamed protein product [Thellungiella halophila]
Unigene11575_NAU-LB	1114	95	54	20.677	9.32062	-1.14953	Down	1.72872e-06	9.55627e-06	K11294|1|1e-10|65.9|ath:AT3G18610|nucleolin	GO:0031981//nuclear lumen	GO:0005488//binding	GO:0048827//phyllome development;GO:0000469//cleavage involved in rRNA processing;GO:0010051//xylem and phloem pattern formation	gi|297789805|ref|XP_002862832.1|/2.36512e-23/hypothetical protein ARALYDRAFT_359344 [Arabidopsis lyrata subsp. lyrata]
gi|167498591|gb|FD981051.1|FD981051	677	294	167	105.295	47.4312	-1.15053	Down	3.5394e-17	4.51887e-16	K11517|1|2e-92|318|aly:ARALYDRAFT_478862|(S)-2-hydroxy-acid oxidase [EC:1.1.3.15]	GO:0005840//ribosome;GO:0009532//plastid stroma;GO:0005576//extracellular region;GO:0042579//microbody	GO:0003973//(S)-2-hydroxy-acid oxidase activity;GO:0000166//nucleotide binding	GO:0008152//metabolic process	gi|54043095|gb|AAV28535.1|/8.16283e-94/glycolate oxidase [Brassica napus]
CL3745.Contig2_NAU-LB	2483	81	46	7.90966	3.56219	-1.15085	Down	9.89632e-06	4.94362e-05	K00924|1|3e-118|424|aly:ARALYDRAFT_473063|[EC:2.7.1.-];K08286|3|6e-109|393|aly:ARALYDRAFT_491919|protein-serine/threonine kinase [EC:2.7.11.-]	GO:0031224//intrinsic to membrane;GO:0031410//cytoplasmic vesicle	GO:0004672//protein kinase activity;GO:0032559	GO:0007167//enzyme linked receptor protein signaling pathway;GO:0006464//cellular protein modification process	gi|297839079|ref|XP_002887421.1|/0/hypothetical protein ARALYDRAFT_476351 [Arabidopsis lyrata subsp. lyrata]
CL3684.Contig3_NAU-LB	1542	254	144	39.9391	17.9562	-1.15332	Down	4.23372e-15	4.80009e-14	K00161|1|0.0|724|aly:ARALYDRAFT_889967|pyruvate dehydrogenase E1 component subunit alpha [EC:1.2.4.1]	GO:0044429//mitochondrial part	GO:0046914//transition metal ion binding;GO:0004738//pyruvate dehydrogenase activity	GO:0006970//response to osmotic stress;GO:0010038//response to metal ion;GO:0006007//glucose catabolic process	gi|297850898|ref|XP_002893330.1|/0/IAA-conjugate-resistant 4 [Arabidopsis lyrata subsp. lyrata]
Unigene16918_NAU-LB	2132	219	124	24.9061	11.1833	-1.15515	Down	2.96822e-13	3.00602e-12	K03934|1|0.0|1268|ath:AT5G37510|NADH dehydrogenase (ubiquinone) Fe-S protein 1 [EC:1.6.5.3 1.6.99.3]	GO:0005746//mitochondrial respiratory chain;GO:0030964;GO:0009536//plastid	GO:0043169//cation binding;GO:0051536//iron-sulfur cluster binding;GO:0050136//NADH dehydrogenase (quinone) activity	GO:0022904//respiratory electron transport chain;GO:0051234//establishment of localization;GO:0003006//developmental process involved in reproduction;GO:0043094;GO:0006950//response to stress	gi|30693102|ref|NP_851103.1|/0/NADH-ubiquinone oxidoreductase subunit [Arabidopsis thaliana]
gi|167478199|gb|FD965299.1|FD965299	706	159	90	54.6062	24.5117	-1.15559	Down	5.06344e-10	4.01242e-09	K03963|1|5e-48|189|aly:ARALYDRAFT_484128|NADH dehydrogenase (ubiquinone) 1 beta subcomplex 7 [EC:1.6.5.3 1.6.99.3]	GO:0030964;GO:0005746//mitochondrial respiratory chain	GO:0050136//NADH dehydrogenase (quinone) activity	GO:0043094;GO:0022904//respiratory electron transport chain	gi|229914874|gb|ACQ90599.1|/2.56517e-52/putative NADH dehydrogenase [Eutrema halophilum]
Unigene16494_NAU-LB	847	822	465	235.309	105.562	-1.15647	Down	1.76969e-45	5.55479e-44	K03094|1|2e-75|280|ath:AT1G75950|S-phase kinase-associated protein 1	GO:0043231//intracellular membrane-bounded organelle;GO:0015630//microtubule cytoskeleton;GO:0031461//cullin-RING ubiquitin ligase complex;GO:0044444//cytoplasmic part;GO:0016020//membrane	GO:0005488//binding	GO:0010038//response to metal ion;GO:0007126//meiosis;GO:0019941//modification-dependent protein catabolic process;GO:0000087//M phase of mitotic cell cycle;GO:0000018//regulation of DNA recombination	gi|18958257|dbj|BAB85607.1|/9.84686e-79/kinetochore protein [Brassica juncea]
Unigene7025_NAU-LB	1045	101	57	23.4344	10.488	-1.15988	Down	6.77772e-07	3.93984e-06	K06129|1|4e-160|562|aly:ARALYDRAFT_890273|lysophospholipase III [EC:3.1.1.5];K06129|1|4e-160|562|aly:ARALYDRAFT_890273|lysophospholipase III [EC:3.1.1.5]	GO:0031090//organelle membrane;GO:0043231//intracellular membrane-bounded organelle	GO:0008374//O-acyltransferase activity	GO:0044238//primary metabolic process	gi|297845698|ref|XP_002890730.1|/4.58973e-159/lecithin:cholesterol acyltransferase family protein [Arabidopsis lyrata subsp. lyrata]
CL3324.Contig3_NAU-LB	1161	94	53	19.6311	8.77768	-1.16123	Down	1.61531e-06	8.96051e-06	K03869|1|0.0|728|ath:AT1G26830|cullin 3	GO:0031461//cullin-RING ubiquitin ligase complex	GO:0019899//enzyme binding	GO:0009416//response to light stimulus;GO:0019941//modification-dependent protein catabolic process;GO:0009908//flower development	gi|15223361|ref|NP_174005.1|/0/cullin 3 [Arabidopsis thaliana]
CL4249.Contig1_NAU-LB	1427	94	53	15.9718	7.14148	-1.16123	Down	1.61531e-06	8.9614e-06	K00852|1|2e-146|517|aly:ARALYDRAFT_312683|ribokinase [EC:2.7.1.15]	GO:0009532//plastid stroma	GO:0016773//phosphotransferase activity, alcohol group as acceptor	GO:0019321//pentose metabolic process	gi|15220039|ref|NP_173159.1|/8.10264e-147/ribokinase [Arabidopsis thaliana]
Unigene614_NAU-LB	1548	142	80	22.2416	9.937	-1.16238	Down	3.57856e-09	2.64041e-08	K13463|1|1e-171|601|ath:AT2G39940|coronatine-insensitive protein 1	GO:0031461//cullin-RING ubiquitin ligase complex	GO:0005488//binding;GO:0019787//small conjugating protein ligase activity	GO:0043161//proteasomal ubiquitin-dependent protein catabolic process;GO:0006952//defense response;GO:0051707//response to other organism;GO:0009719;GO:0009611//response to wounding;GO:0009908//flower development;GO:0007165//signal transduction;GO:0009639//response to red or far red light	gi|149939499|gb|ABR45956.1|/5.26263e-171/coronitine insensitive 1 [Arabidopsis lyrata]
gnl|UG|Rsa#S42043124	832	318	179	92.673	41.3681	-1.16363	Down	9.14248e-19	1.26392e-17	K02183|1|5e-77|285|vvi:100232908|calmodulin	GO:0031090//organelle membrane	GO:0046872//metal ion binding	GO:0019932//second-messenger-mediated signaling;GO:0009640//photomorphogenesis;GO:0009593//detection of chemical stimulus	gi|460411709|ref|XP_004251248.1|/5.26636e-77/PREDICTED: calmodulin-like isoform 1 [Solanum lycopersicum]
Unigene13008_NAU-LB	1002	64	36	15.4868	6.9083	-1.16464	Down	7.35498e-05	0.00032201	K13417|1|9e-52|202|ath:AT2G13790|somatic embryogenesis receptor kinase 4 [EC:2.7.10.1 2.7.11.1];K04733|3|1e-51|201|smo:SELMODRAFT_159261|interleukin-1 receptor-associated kinase 4 [EC:2.7.11.1];K13430|5|1e-50|198|zma:100283091|serine/threonine-protein kinase PBS1 [EC:2.7.11.1]	GO:0044464//cell part	GO:0030246//carbohydrate binding;GO:0004672//protein kinase activity;GO:0032559	GO:0006464//cellular protein modification process;GO:0008037//cell recognition	gi|15219914|ref|NP_176332.1|/1.25632e-158/S-locus lectin protein kinase family protein [Arabidopsis thaliana]
Unigene3766_NAU-LB	1861	73	41	9.51099	4.23617	-1.16683	Down	2.21996e-05	0.000105547	K14555|1|9e-07|53.9|smo:SELMODRAFT_80645|U3 small nucleolar RNA-associated protein 13;K13124|3|6e-06|51.2|gmx:100775310|mitogen-activated protein kinase organizer 1;K14863|4|7e-06|50.8|aly:ARALYDRAFT_488399|ribosome biogenesis protein YTM1	GO:0031461//cullin-RING ubiquitin ligase complex	GO:0004672//protein kinase activity;GO:0032559	GO:0006464//cellular protein modification process	gi|240256309|ref|NP_974804.4|/0/protein serine/threonine kinase [Arabidopsis thaliana]
CL3734.Contig2_NAU-LB	1091	5249	2947	1166.54	519.388	-1.16736	Down	1.81136e-284	3.57063e-282	K08909|1|3e-128|456|aly:ARALYDRAFT_475174|light-harvesting complex I chlorophyll a/b binding protein 3	GO:0009521;GO:0031224//intrinsic to membrane;GO:0009570//chloroplast stroma;GO:0009534//chloroplast thylakoid	GO:0046906//tetrapyrrole binding;GO:0043169//cation binding	GO:0006464//cellular protein modification process;GO:0006091//generation of precursor metabolites and energy	gi|312281797|dbj|BAJ33764.1|/1.53736e-128/unnamed protein product [Thellungiella halophila]
gnl|UG|Rsa#S43016071	900	57	32	15.3561	6.83665	-1.16745	Down	0.000178433	0.000735281	K01535|1|3e-87|301|ath:AT5G57350|H+-transporting ATPase [EC:3.6.3.6]	GO:0043231//intracellular membrane-bounded organelle;GO:0031224//intrinsic to membrane	GO:0046872//metal ion binding;GO:0032559;GO:0015662//ATPase activity, coupled to transmembrane movement of ions, phosphorylative mechanism	GO:0015988//energy coupled proton transmembrane transport, against electrochemical gradient;GO:0010118//stomatal movement;GO:0009207;GO:0006950//response to stress;GO:0009206;GO:0009725//response to hormone stimulus	gi|15242103|ref|NP_200545.1|/4.23866e-86/H(+)-ATPase 3 [Arabidopsis thaliana]
CL7680.Contig1_NAU-LB	1413	57	32	9.78097	4.35456	-1.16745	Down	0.000178433	0.000735226	K13415|1|5e-78|290|rcu:RCOM_0478150|protein brassinosteroid insensitive 1 [EC:2.7.10.1 2.7.11.1]	GO:0031224//intrinsic to membrane	GO:0004872//receptor activity;GO:0004672//protein kinase activity;GO:0016628//oxidoreductase activity, acting on the CH-CH group of donors, NAD or NADP as acceptor;GO:0032559	GO:0006464//cellular protein modification process;GO:0006950//response to stress;GO:0007167//enzyme linked receptor protein signaling pathway	gi|297841971|ref|XP_002888867.1|/0/hypothetical protein ARALYDRAFT_476358 [Arabidopsis lyrata subsp. lyrata]
Unigene14780_NAU-LB	1655	82	46	12.0134	5.34436	-1.16855	Down	6.74514e-06	3.46315e-05	K02083|1|4e-48|191|ppp:PHYPADRAFT_111019|allantoate deiminase [EC:3.5.3.9]	GO:0043231//intracellular membrane-bounded organelle	GO:0016813//hydrolase activity, acting on carbon-nitrogen (but not peptide) bonds, in linear amidines;GO:0070011//peptidase activity, acting on L-amino acid peptides	GO:0000255//allantoin metabolic process	gi|22327548|ref|NP_199173.2|/0/ureidoglycolate amidohydrolase [Arabidopsis thaliana]
CL4639.Contig3_NAU-LB	1138	75	42	15.9797	7.09648	-1.17106	Down	1.61834e-05	7.89141e-05	K00939|1|5e-136|482|aly:ARALYDRAFT_482717|adenylate kinase [EC:2.7.4.3]	GO:0009532//plastid stroma	GO:0016776//phosphotransferase activity, phosphate group as acceptor;GO:0019205//nucleobase-containing compound kinase activity;GO:0032559	GO:0006796//phosphate-containing compound metabolic process;GO:0009117//nucleotide metabolic process;GO:0006520//cellular amino acid metabolic process;GO:0048513//organ development	gi|297823551|ref|XP_002879658.1|/6.85194e-135/ADK/ATPADK1 [Arabidopsis lyrata subsp. lyrata]
Unigene19795_NAU-LB	1789	234	131	31.7143	14.0798	-1.1715	Down	2.39048e-14	2.58983e-13	K00130|1|0.0|974|ath:AT3G48170|betaine-aldehyde dehydrogenase [EC:1.2.1.8]	GO:0030312//external encapsulating structure;GO:0042579//microbody	GO:0016620//oxidoreductase activity, acting on the aldehyde or oxo group of donors, NAD or NADP as acceptor	GO:0008152//metabolic process	gi|33943628|gb|AAQ55493.1|/0/betaine aldehyde dehydrogenase [Brassica napus]
CL478.Contig1_NAU-LB	2702	152	85	13.6398	6.04881	-1.1731	Down	7.62884e-10	5.95868e-09	K01231|1|0.0|1663|ath:AT5G14950|alpha-mannosidase II [EC:3.2.1.114]	GO:0043231//intracellular membrane-bounded organelle	GO:0046914//transition metal ion binding;GO:0015924	GO:0006486//protein glycosylation;GO:0019318//hexose metabolic process	gi|15242174|ref|NP_196999.1|/0/alpha-mannosidase II [Arabidopsis thaliana]
CL1304.Contig2_NAU-LB	1290	68	38	12.7811	5.66409	-1.1741	Down	3.89594e-05	0.000179549	K01074|1|3e-171|599|ath:AT3G60340|palmitoyl-protein thioesterase [EC:3.1.2.22]	GO:0043231//intracellular membrane-bounded organelle	GO:0016790//thiolester hydrolase activity	GO:0043412//macromolecule modification	gi|15232301|ref|NP_191593.1|/3.48846e-170/palmitoyl protein thioesterase family protein [Arabidopsis thaliana]
CL10017.Contig2_NAU-LB	1398	68	38	11.7937	5.22652	-1.1741	Down	3.89594e-05	0.000179563	K04506|1|4e-165|579|ath:AT4G27880|E3 ubiquitin-protein ligase SIAH1 [EC:6.3.2.19]	GO:0043231//intracellular membrane-bounded organelle	GO:0046914//transition metal ion binding;GO:0019787//small conjugating protein ligase activity	GO:0019941//modification-dependent protein catabolic process;GO:0032501//multicellular organismal process;GO:0032446//protein modification by small protein conjugation	gi|15234306|ref|NP_194517.1|/5.4788e-164/E3 ubiquitin-protein ligase SINAT4 [Arabidopsis thaliana]
Unigene721_NAU-LB	1452	111	62	18.5356	8.21034	-1.17478	Down	1.42502e-07	8.9519e-07	K01537|1|0.0|807|ath:AT1G07670|Ca2+-transporting ATPase [EC:3.6.3.8]	GO:0031227//intrinsic to endoplasmic reticulum membrane	GO:0019829//cation-transporting ATPase activity;GO:0032559	GO:0010038//response to metal ion;GO:0009206;GO:0000041//transition metal ion transport;GO:0030003//cellular cation homeostasis;GO:0070838//divalent metal ion transport	gi|186478235|ref|NP_172246.3|/0/Ca2+-transporting ATPase [Arabidopsis thaliana]
CL275.Contig2_NAU-LB	773	172	96	53.9509	23.8796	-1.17586	Down	5.46194e-11	4.69788e-10	K14486|1|5e-23|106|gmx:100819023|auxin response factor	GO:0009536//plastid	GO:0003676//nucleic acid binding;GO:0001071//nucleic acid binding transcription factor activity;GO:0005515//protein binding	GO:0006355//regulation of transcription, DNA-dependent;GO:0009908//flower development;GO:0009755//hormone-mediated signaling pathway;GO:0009900;GO:0010260//organ senescence;GO:0008283//cell proliferation	gi|379323192|gb|AFD01295.1|/1.71798e-47/auxin response factor 2-3 [Brassica rapa subsp. pekinensis]
CL3627.Contig1_NAU-LB	2396	17431	9724	1763.94	780.359	-1.1766	Down	0	0	K00830|1|0.0|746|ath:AT2G13360|alanine-glyoxylate transaminase / serine-glyoxylate transaminase / serine-pyruvate transaminase [EC:2.6.1.44 2.6.1.45 2.6.1.51]	GO:0009532//plastid stroma;GO:0005576//extracellular region;GO:0042579//microbody;GO:0016020//membrane	GO:0008483//transaminase activity;GO:0048037//cofactor binding	GO:0043094	gi|312281985|dbj|BAJ33858.1|/0/unnamed protein product [Thellungiella halophila]
gi|158655810|gb|EX765701.1|EX765701	663	79	44	28.891	12.7607	-1.17891	Down	8.6053e-06	4.365e-05	K13418|1|5e-15|79.3|ath:AT1G71830|somatic embryogenesis receptor kinase 1 [EC:2.7.10.1 2.7.11.1];K13416|5|3e-13|73.6|rcu:RCOM_1534760|brassinosteroid insensitive 1-associated receptor kinase 1 [EC:2.7.10.1 2.7.11.1]	GO:0016020//membrane	GO:0004672//protein kinase activity;GO:0032559	GO:0006464//cellular protein modification process	gi|12321752|gb|AAG50912.1|AC069159_13/8.53111e-108/hypothetical protein, 3' partial [Arabidopsis thaliana]
CL7114.Contig1_NAU-LB	1262	424	236	81.4622	35.9574	-1.17984	Down	5.2209e-25	9.30804e-24	K06215|1|8e-160|561|aly:ARALYDRAFT_908014|pyridoxine biosynthesis protein [EC:4.-.-.-]	GO:0044444//cytoplasmic part;GO:0016020//membrane	GO:0042802//identical protein binding;GO:0046983//protein dimerization activity	GO:0042364;GO:0009108//coenzyme biosynthetic process;GO:0006778//porphyrin-containing compound metabolic process;GO:0008614//pyridoxine metabolic process;GO:0006972//hyperosmotic response;GO:0033194//response to hydroperoxide;GO:0019752//carboxylic acid metabolic process	gi|15240972|ref|NP_195761.1|/1.02904e-158/Pyridoxal biosynthesis protein PDX1.3 [Arabidopsis thaliana]
CL4471.Contig1_NAU-LB	2009	72	40	8.68964	3.82839	-1.18256	Down	2.0658e-05	9.92702e-05	K11407|1|3e-149|527|gmx:100804724|histone deacetylase 6/10 [EC:3.5.1.98]	GO:0043231//intracellular membrane-bounded organelle	GO:0046914//transition metal ion binding	GO:0006476//protein deacetylation;GO:0009292//genetic transfer	gi|297830512|ref|XP_002883138.1|/0/hypothetical protein ARALYDRAFT_479356 [Arabidopsis lyrata subsp. lyrata]
CL2756.Contig4_NAU-LB	1780	110	61	14.9838	6.5894	-1.18518	Down	1.32538e-07	8.34107e-07	K03781|1|0.0|998|ath:AT1G20630|catalase [EC:1.11.1.6]	GO:0005840//ribosome;GO:0030312//external encapsulating structure;GO:0000325//plant-type vacuole;GO:0009526//plastid envelope;GO:0042579//microbody;GO:0031090//organelle membrane	GO:0005275//amine transmembrane transporter activity;GO:0004601//peroxidase activity;GO:0005506//iron ion binding	GO:0010038//response to metal ion;GO:0009725//response to hormone stimulus;GO:0000302//response to reactive oxygen species;GO:0009267//cellular response to starvation;GO:0009416//response to light stimulus;GO:0019725//cellular homeostasis;GO:0042743//hydrogen peroxide metabolic process;GO:0015837//amine transport	gi|2511725|gb|AAC17731.1|/0/catalase 1 [Arabidopsis thaliana]
Unigene20454_NAU-LB	1929	193	107	24.2591	10.6657	-1.18555	Down	2.69042e-12	2.5618e-11	K03319|1|0.0|668|bdi:100845105|divalent anion:Na+ symporter, DASS family	GO:0009526//plastid envelope	GO:0015140//malate transmembrane transporter activity	GO:0051707//response to other organism;GO:0030001//metal ion transport;GO:0015740//C4-dicarboxylate transport	gi|15237658|ref|NP_201233.1|/0/dicarboxylate transporter 2.2 [Arabidopsis thaliana]
gi|161549433|gb|EY921322.1|EY921322	741	74	41	24.2138	10.639	-1.18646	Down	1.50481e-05	7.34617e-05	K03671|1|2e-08|57.8|gmx:100499871|thioredoxin 1	GO:0009532//plastid stroma	GO:0015036//disulfide oxidoreductase activity	GO:0018904;GO:0019725//cellular homeostasis	gi|297843552|ref|XP_002889657.1|/2.00638e-66/predicted protein [Arabidopsis lyrata subsp. lyrata]
gi|167483808|gb|FD966450.1|FD966450	759	74	41	23.6396	10.3867	-1.18646	Down	1.50481e-05	7.34682e-05	K00344|1|5e-08|56.2|osa:4331289|NADPH2:quinone reductase [EC:1.6.5.5]	GO:0042579//microbody	GO:0046914//transition metal ion binding;GO:0016655//oxidoreductase activity, acting on NAD(P)H, quinone or similar compound as acceptor	GO:0008152//metabolic process	gi|110740865|dbj|BAE98529.1|/3.31798e-64/quinone reductase-like protein [Arabidopsis thaliana]
CL2192.Contig3_NAU-LB	1561	278	154	43.1809	18.9694	-1.18672	Down	4.41874e-17	5.61063e-16	K00765|1|0.0|685|ath:AT1G58080|ATP phosphoribosyltransferase [EC:2.4.2.17]	GO:0009536//plastid	GO:0016763//transferase activity, transferring pentosyl groups;GO:0046872//metal ion binding	GO:0006547//histidine metabolic process	gi|15217837|ref|NP_176105.1|/0/ATP phosphoribosyl transferase 1 [Arabidopsis thaliana]
Unigene8715_NAU-LB	711	65	36	22.1663	9.73574	-1.18701	Down	4.97634e-05	0.000223593	K02021|1|5e-104|375|aly:ARALYDRAFT_487170|putative ABC transport system ATP-binding protein	GO:0031224//intrinsic to membrane	GO:0042626//ATPase activity, coupled to transmembrane movement of substances;GO:0032559	GO:0006810//transport;GO:0009207	gi|297810479|ref|XP_002873123.1|/5.49367e-103/hypothetical protein ARALYDRAFT_487170 [Arabidopsis lyrata subsp. lyrata]
gnl|UG|Rsa#S42045154	685	56	31	19.822	8.70176	-1.18772	Down	0.000165883	0.000687386	K12668|1|1e-55|214|aly:ARALYDRAFT_890787|oligosaccharyltransferase complex subunit epsilon	GO:0043231//intracellular membrane-bounded organelle;GO:0031224//intrinsic to membrane	GO:0004576//oligosaccharyl transferase activity	GO:0043066//negative regulation of apoptotic process	gi|297851662|ref|XP_002893712.1|/1.17015e-54/ATDAD1 [Arabidopsis lyrata subsp. lyrata]
CL1648.Contig1_NAU-LB	954	56	31	14.2328	6.24812	-1.18772	Down	0.000165883	0.000687335	K01265|1|2e-146|516|ath:AT3G59990|methionyl aminopeptidase [EC:3.4.11.18]	GO:0044424//intracellular part	GO:0008237//metallopeptidase activity;GO:0008238//exopeptidase activity;GO:0043169//cation binding	GO:0051604//protein maturation	gi|7019693|emb|CAB75818.1|/2.50813e-145/putative protein [Arabidopsis thaliana]
CL10001.Contig1_NAU-LB	1442	112	62	18.8322	8.26728	-1.18772	Down	9.69936e-08	6.18962e-07	K12183|1|1e-138|491|ath:AT5G13860|ESCRT-I complex subunit TSG101	GO:0032991//macromolecular complex;GO:0010008//endosome membrane	GO:0032182//small conjugating protein binding	GO:0000904//cell morphogenesis involved in differentiation;GO:0006464//cellular protein modification process	gi|15240732|ref|NP_196890.1|/1.55377e-137/protein ELC-like protein [Arabidopsis thaliana]
CL2365.Contig1_NAU-LB	929	619	342	161.556	70.7859	-1.19051	Down	3.02498e-36	7.59168e-35	K00432|1|6e-111|398|aly:ARALYDRAFT_901118|glutathione peroxidase [EC:1.11.1.9]	GO:0009526//plastid envelope;GO:0009532//plastid stroma;GO:0009534//chloroplast thylakoid	GO:0004601//peroxidase activity	GO:0009628//response to abiotic stimulus;GO:0006950//response to stress;GO:0008152//metabolic process	gi|298112872|gb|ADI58543.1|/6.65428e-119/glutathione peroxidase 1 [Brassica napus]
Unigene19513_NAU-LB	1913	328	181	41.5727	18.1928	-1.19227	Down	5.17228e-20	7.56437e-19	K12866|1|2e-31|135|pop:POPTR_824729|WW domain-binding protein 11	GO:0043231//intracellular membrane-bounded organelle	-	GO:0009648//photoperiodism	gi|15241903|ref|NP_201070.1|/1.27015e-108/proline-rich family protein [Arabidopsis thaliana]
CL1498.Contig1_NAU-LB	3728	58	32	3.77226	1.65048	-1.19254	Down	0.00012037	0.000504088	K03006|1|0.0|2269|aly:ARALYDRAFT_491060|DNA-directed RNA polymerase II subunit RPB1 [EC:2.7.7.6]	GO:0016591//DNA-directed RNA polymerase II, holoenzyme;GO:0009536//plastid	GO:0034062//RNA polymerase activity;GO:0003676//nucleic acid binding	GO:0006351//transcription, DNA-dependent	gi|334187204|ref|NP_195305.2|/0/DNA-directed RNA polymerase II subunit RPB1 [Arabidopsis thaliana]
gnl|UG|Rsa#S42026471	886	87	48	23.8087	10.417	-1.19254	Down	2.43818e-06	1.3178e-05	K00011|1|1e-98|357|ath:AT2G37790|aldehyde reductase [EC:1.1.1.21];K00002|2|2e-84|310|osa:4338987|alcohol dehydrogenase (NADP+) [EC:1.1.1.2];K08243|3|3e-38|157|gmx:547911|6'-deoxychalcone synthase [EC:2.3.1.170];K00085|5|2e-31|134|ath:AT2G21260|aldose-6-phosphate reductase (NADPH2) [EC:1.1.1.200]	GO:0043231//intracellular membrane-bounded organelle;GO:0044444//cytoplasmic part	GO:0050661//NADP binding;GO:0004033//aldo-keto reductase (NADP) activity	GO:0006970//response to osmotic stress;GO:0008152//metabolic process;GO:0010038//response to metal ion	gi|312281947|dbj|BAJ33839.1|/2.50296e-112/unnamed protein product [Thellungiella halophila]
gnl|UG|Rsa#S42005991	858	69	38	19.499	8.51594	-1.19516	Down	2.63312e-05	0.000123845	K07877|1|4e-101|365|aly:ARALYDRAFT_493160|Ras-related protein Rab-2A;K07976|2|4e-101|365|ath:AT4G17170|Rab family, other;K07878|4|1e-96|350|osa:4336117|Ras-related protein Rab-2B	GO:0005793//endoplasmic reticulum-Golgi intermediate compartment;GO:0043231//intracellular membrane-bounded organelle;GO:0016020//membrane	GO:0032561//guanyl ribonucleotide binding	GO:0035556//intracellular signal transduction;GO:0048193//Golgi vesicle transport	gi|224124750|ref|XP_002329939.1|/1.22561e-100/predicted protein [Populus trichocarpa]
CL3638.Contig1_NAU-LB	7359	598	328	19.703	8.5702	-1.20101	Down	1.51433e-35	3.72479e-34	K11262|1|0.0|4225|aly:ARALYDRAFT_891254|acetyl-CoA carboxylase / biotin carboxylase [EC:6.4.1.2 6.3.4.14]	GO:0009536//plastid;GO:0016020//membrane	GO:0016879//ligase activity, forming carbon-nitrogen bonds;GO:0016421//CoA carboxylase activity;GO:0032559	GO:0006633//fatty acid biosynthetic process;GO:0009725//response to hormone stimulus;GO:0048507//meristem development;GO:0003006//developmental process involved in reproduction	gi|297846662|ref|XP_002891212.1|/0/F5J5.19 [Arabidopsis lyrata subsp. lyrata]
CL6028.Contig3_NAU-LB	3036	73	40	5.83003	2.53334	-1.20246	Down	1.39484e-05	6.8575e-05	K04424|1|1e-122|439|aly:ARALYDRAFT_909157|sterile alpha motif and leucine zipper containing kinase AZK [EC:2.7.11.25];K14510|5|3e-112|404|ppp:PHYPADRAFT_30352|serine/threonine-protein kinase CTR1 [EC:2.7.11.1]	GO:0031224//intrinsic to membrane;GO:0005768//endosome;GO:0015629//actin cytoskeleton;GO:0044431//Golgi apparatus part	GO:0008092//cytoskeletal protein binding;GO:0017111//nucleoside-triphosphatase activity;GO:0032559;GO:0004702//receptor signaling protein serine/threonine kinase activity	GO:0051707//response to other organism;GO:0006468//protein phosphorylation;GO:0007243//intracellular protein kinase cascade;GO:0009725//response to hormone stimulus;GO:0006950//response to stress	gi|149939551|gb|ABR45982.1|/0/enhanced disease resistance 1 [Arabidopsis lyrata]
Unigene16818_NAU-LB	740	106	58	34.7315	15.0707	-1.2045	Down	1.55827e-07	9.74386e-07	K03868|1|8e-59|224|gmx:100526919|RING-box protein 1	GO:0031461//cullin-RING ubiquitin ligase complex	GO:0046914//transition metal ion binding	GO:0032446//protein modification by small protein conjugation	gi|18420256|ref|NP_568396.1|/7.64192e-58/RING-box protein 1 [Arabidopsis thaliana]
CL7881.Contig3_NAU-LB	1225	377	206	74.6199	32.3346	-1.20648	Down	3.58842e-23	5.97593e-22	K02137|1|8e-106|382|aly:ARALYDRAFT_488165|F-type H+-transporting ATPase oligomycin sensitivity conferral protein [EC:3.6.3.14]	GO:0009536//plastid;GO:0033178//proton-transporting two-sector ATPase complex, catalytic domain	GO:0015078//hydrogen ion transmembrane transporter activity;GO:0046914//transition metal ion binding	GO:0006818//hydrogen transport;GO:0006754//ATP biosynthetic process	gi|119720766|gb|ABL97953.1|/6.44844e-118/hydrogen-transporting ATP synthase [Brassica rapa]
CL6089.Contig2_NAU-LB	939	66	36	17.0423	7.37179	-1.20903	Down	3.3505e-05	0.000155274	K00759|1|2e-88|323|aly:ARALYDRAFT_895993|adenine phosphoribosyltransferase [EC:2.4.2.7]	GO:0044444//cytoplasmic part;GO:0016020//membrane	GO:0016763//transferase activity, transferring pentosyl groups;GO:0015103//inorganic anion transmembrane transporter activity	GO:0043096//purine nucleobase salvage	gi|297839933|ref|XP_002887848.1|/2.34579e-87/hypothetical protein ARALYDRAFT_895993 [Arabidopsis lyrata subsp. lyrata]
Unigene17421_NAU-LB	2022	132	72	15.8286	6.8468	-1.20903	Down	4.28864e-09	3.12821e-08	K13946|1|0.0|901|aly:ARALYDRAFT_482819|auxin influx carrier (AUX1 LAX family)	GO:0031224//intrinsic to membrane;GO:0043231//intracellular membrane-bounded organelle	GO:0042562//hormone binding;GO:0005275//amine transmembrane transporter activity;GO:0080161//auxin transmembrane transporter activity;GO:0015291//secondary active transmembrane transporter activity	GO:0060918//auxin transport;GO:0010102//lateral root morphogenesis;GO:0051707//response to other organism;GO:0001738//morphogenesis of a polarized epithelium;GO:0009755//hormone-mediated signaling pathway;GO:0048764;GO:0009630//gravitropism;GO:0015837//amine transport	gi|270272090|gb|ACZ67478.1|/0/auxin resistant 1 protein [Brassica rapa subsp. campestris]
CL6885.Contig1_NAU-LB	1125	55	30	11.8539	5.12749	-1.20903	Down	0.000153572	0.000638463	K00472|1|3e-151|532|aly:ARALYDRAFT_484624|prolyl 4-hydroxylase [EC:1.14.11.2]	GO:0031090//organelle membrane;GO:0043231//intracellular membrane-bounded organelle	GO:0046914//transition metal ion binding;GO:0019842//vitamin binding;GO:0019798	GO:0019471	gi|297818456|ref|XP_002877111.1|/4.36812e-150/oxidoreductase [Arabidopsis lyrata subsp. lyrata]
Unigene20487_NAU-LB	2858	101	55	8.56857	3.7003	-1.21141	Down	2.69846e-07	1.64389e-06	K12813|1|0.0|1553|ath:AT1G32490|pre-mRNA-splicing factor ATP-dependent RNA helicase DHX16 [EC:3.6.4.13]	GO:0044464//cell part	GO:0042623//ATPase activity, coupled;GO:0003724//RNA helicase activity;GO:0032559	GO:0006396//RNA processing;GO:0016441//posttranscriptional gene silencing;GO:0003006//developmental process involved in reproduction	gi|22329903|ref|NP_174527.2|/0/pre-mRNA-splicing factor ATP-dependent RNA helicase DHX16 [Arabidopsis thaliana]
CL4750.Contig1_NAU-LB	1751	90	49	12.4625	5.38079	-1.21171	Down	1.20187e-06	6.75814e-06	K13418|1|4e-73|274|rcu:RCOM_0186340|somatic embryogenesis receptor kinase 1 [EC:2.7.10.1 2.7.11.1]	GO:0016020//membrane	GO:0016301//kinase activity;GO:0032559	GO:0051259//protein oligomerization;GO:0009856//pollination;GO:0009698//phenylpropanoid metabolic process;GO:0007167//enzyme linked receptor protein signaling pathway;GO:0009555//pollen development;GO:0003006//developmental process involved in reproduction;GO:0000578//embryonic axis specification;GO:0006950//response to stress;GO:0006464//cellular protein modification process	gi|224589553|gb|ACN59310.1|/0/leucine-rich repeat receptor-like protein kinase [Arabidopsis thaliana]
gnl|UG|Rsa#S42589449	783	68	37	21.057	9.08607	-1.21257	Down	2.4358e-05	0.000115384	K12391|1|8e-57|218|aly:ARALYDRAFT_475305|AP-1 complex subunit gamma-1	GO:0030130//clathrin coat of trans-Golgi network vesicle;GO:0030119//AP-type membrane coat adaptor complex	GO:0022892;GO:0005515//protein binding	GO:0015031//protein transport	gi|297845438|ref|XP_002890600.1|/1.5278e-67/GAMMA-ADAPTIN 1 [Arabidopsis lyrata subsp. lyrata]
CL3084.Contig1_NAU-LB	890	81	44	22.0671	9.50602	-1.21498	Down	3.92596e-06	2.07334e-05	K07095|1|2e-97|353|aly:ARALYDRAFT_906012|	GO:0012505//endomembrane system;GO:0005770//late endosome	GO:0016787//hydrolase activity	GO:0007041//lysosomal transport;GO:0006605//protein targeting	gi|297819384|ref|XP_002877575.1|/2.5293e-96/hypothetical protein ARALYDRAFT_906012 [Arabidopsis lyrata subsp. lyrata]
Unigene13399_NAU-LB	1780	802	435	109.246	46.99	-1.21715	Down	4.62718e-48	1.52744e-46	K01696|1|0.0|883|ath:AT4G27070|tryptophan synthase beta chain [EC:4.2.1.20]	GO:0009532//plastid stroma	GO:0048037//cofactor binding;GO:0016836//hydro-lyase activity	GO:0009683;GO:0006568//tryptophan metabolic process;GO:0008652//cellular amino acid biosynthetic process;GO:0006950//response to stress	gi|15236977|ref|NP_194437.1|/0/tryptophan synthase beta chain [Arabidopsis thaliana]
CL4676.Contig1_NAU-LB	1279	677	367	128.342	55.1736	-1.21794	Down	6.99166e-41	1.96989e-39	K03671|1|1e-08|59.7|vvi:100246832|thioredoxin 1;K09584|2|4e-08|57.8|vvi:100258052|protein disulfide-isomerase A6 [EC:5.3.4.1];K01829|5|8e-08|56.6|rcu:RCOM_1434600|protein disulfide-isomerase [EC:5.3.4.1]	GO:0031976;GO:0009532//plastid stroma;GO:0044436	GO:0015036//disulfide oxidoreductase activity	GO:0017004//cytochrome complex assembly;GO:0018904;GO:0019725//cellular homeostasis	gi|15235475|ref|NP_195437.1|/1.63814e-95/thioredoxin-like protein HCF164 [Arabidopsis thaliana]
CL4617.Contig2_NAU-LB	3025	72	39	5.77107	2.47899	-1.21909	Down	1.28861e-05	6.36676e-05	K14293|1|8e-24|111|smo:SELMODRAFT_158150|importin subunit beta-1	GO:0005635//nuclear envelope	GO:0005488//binding;GO:0022892	GO:0060918//auxin transport;GO:0016049//cell growth;GO:0048507//meristem development;GO:0006913//nucleocytoplasmic transport;GO:0009887//organ morphogenesis;GO:0010051//xylem and phloem pattern formation;GO:0015031//protein transport	gi|79322370|ref|NP_001031359.1|/0/transportin 1 [Arabidopsis thaliana]
CL5710.Contig2_NAU-LB	1713	168	91	23.7794	10.2146	-1.21909	Down	2.54776e-11	2.24805e-10	K08237|1|1e-61|236|vvi:100246482|hydroquinone glucosyltransferase [EC:2.4.1.218]	GO:0044464//cell part	GO:0035251//UDP-glucosyltransferase activity	GO:0009725//response to hormone stimulus;GO:0006970//response to osmotic stress;GO:0009687//abscisic acid metabolic process	gi|15233761|ref|NP_193263.1|/0/UDP-glucosyl transferase 71B5 [Arabidopsis thaliana]
gi|167493279|gb|FD975840.1|FD975840	789	109	59	33.4965	14.3784	-1.2201	Down	7.69294e-08	4.95014e-07	K03233|1|4e-79|182|aly:ARALYDRAFT_474857|elongation factor 1-gamma	GO:0043234//protein complex;GO:0043231//intracellular membrane-bounded organelle;GO:0016020//membrane;GO:0030312//external encapsulating structure	GO:0008135//translation factor activity, nucleic acid binding;GO:0046914//transition metal ion binding	GO:0006412//translation;GO:0010038//response to metal ion	gi|297848262|ref|XP_002892012.1|/5.3674e-78/hypothetical protein ARALYDRAFT_474857 [Arabidopsis lyrata subsp. lyrata]
gi|161540201|gb|EY911919.1|EY911919	776	61	33	19.0598	8.17689	-1.22091	Down	5.86066e-05	0.000259056	K10802|1|3e-35|146|vvi:100257544|high mobility group protein B1	GO:0043231//intracellular membrane-bounded organelle;GO:0044427//chromosomal part	GO:0003676//nucleic acid binding;GO:0005198//structural molecule activity	GO:0006325//chromatin organization	gi|357640485|gb|AET87126.1|/1.12181e-46/high mobility group B2 protein [Brassica napus]
CL8361.Contig1_NAU-LB	1280	259	140	49.0613	21.0307	-1.22209	Down	1.03098e-16	1.28242e-15	K00111|1|0.0|689|aly:ARALYDRAFT_478367|glycerol-3-phosphate dehydrogenase [EC:1.1.5.3]	GO:0043231//intracellular membrane-bounded organelle;GO:0043234//protein complex;GO:0019866//organelle inner membrane	GO:0016901//oxidoreductase activity, acting on the CH-OH group of donors, quinone or similar compound as acceptor;GO:0016899//oxidoreductase activity, acting on the CH-OH group of donors, oxygen as acceptor	GO:0006071//glycerol metabolic process;GO:0022904//respiratory electron transport chain	gi|297829564|ref|XP_002882664.1|/0/hypothetical protein ARALYDRAFT_478367 [Arabidopsis lyrata subsp. lyrata]
Unigene7309_NAU-LB	1556	311	168	48.4619	20.7604	-1.22302	Down	8.80898e-20	1.27588e-18	K02112|1|3e-179|626|aly:ARALYDRAFT_675806|F-type H+-transporting ATPase subunit beta [EC:3.6.3.14]	GO:0009534//chloroplast thylakoid;GO:0033178//proton-transporting two-sector ATPase complex, catalytic domain	GO:0015078//hydrogen ion transmembrane transporter activity;GO:0015662//ATPase activity, coupled to transmembrane movement of ions, phosphorylative mechanism;GO:0019829//cation-transporting ATPase activity;GO:0032559	GO:0015986//ATP synthesis coupled proton transport;GO:0015988//energy coupled proton transmembrane transport, against electrochemical gradient	gi|29336977|sp|Q9MTG8.1|ATPB_RAPSA/0/RecName: Full=ATP synthase subunit beta, chloroplastic; AltName: Full=ATP synthase F1 sector subunit beta; AltName: Full=F-ATPase subunit beta
Unigene17317_NAU-LB	2614	187	101	17.3454	7.42937	-1.22325	Down	1.69654e-12	1.63645e-11	K03549|1|0.0|828|ppp:PHYPADRAFT_140250|KUP system potassium uptake protein	GO:0031090//organelle membrane	GO:0046873//metal ion transmembrane transporter activity	GO:0034220//ion transmembrane transport;GO:0009826//unidimensional cell growth;GO:0030001//metal ion transport	gi|297799628|ref|XP_002867698.1|/0/hypothetical protein ARALYDRAFT_914233 [Arabidopsis lyrata subsp. lyrata]
CL3188.Contig3_NAU-LB	1922	113	61	14.2552	6.10257	-1.224	Down	4.11034e-08	2.72889e-07	K08819|1|0.0|712|aly:ARALYDRAFT_487853|cyclin-dependent kinase 12/13 [EC:2.7.11.22 2.7.11.23]	GO:0044444//cytoplasmic part;GO:0044451//nucleoplasm part	GO:0004672//protein kinase activity;GO:0032559	GO:0048827//phyllome development;GO:0051707//response to other organism;GO:0048437//floral organ development;GO:0006396//RNA processing;GO:0050789//regulation of biological process;GO:0006796//phosphate-containing compound metabolic process;GO:0006464//cellular protein modification process	gi|297794099|ref|XP_002864934.1|/0/cyclin-dependent kinase C_2 [Arabidopsis lyrata subsp. lyrata]
Unigene5255_NAU-LB	1228	113	61	22.3115	9.55141	-1.224	Down	4.11034e-08	2.72856e-07	K08653|1|3e-06|51.6|ota:Ot16g03090|membrane-bound transcription factor site-1 protease [EC:3.4.21.112]	GO:0005618//cell wall	GO:0016787//hydrolase activity	GO:0019538//protein metabolic process	gi|297823887|ref|XP_002879826.1|/9.68227e-122/subtilase [Arabidopsis lyrata subsp. lyrata]
gi|332794470|gb|FY451143.1|FY451143	557	63	34	27.4243	11.7371	-1.22438	Down	4.2547e-05	0.000195192	K01358|1|6e-28|121|aly:ARALYDRAFT_493172|ATP-dependent Clp protease, protease subunit [EC:3.4.21.92]	GO:0009526//plastid envelope;GO:0009532//plastid stroma	GO:0004175//endopeptidase activity	GO:0019538//protein metabolic process	gi|297800408|ref|XP_002868088.1|/6.57742e-27/hypothetical protein ARALYDRAFT_493172 [Arabidopsis lyrata subsp. lyrata]
CL6585.Contig1_NAU-LB	1493	52	28	8.44487	3.60607	-1.22765	Down	0.000195472	0.000798508	K11324|1|0.0|771|aly:ARALYDRAFT_904197|DNA methyltransferase 1-associated protein 1	GO:0043231//intracellular membrane-bounded organelle	GO:0003676//nucleic acid binding;GO:0016741;GO:0001071//nucleic acid binding transcription factor activity	GO:0006355//regulation of transcription, DNA-dependent;GO:0006730//one-carbon metabolic process	gi|312282479|dbj|BAJ34105.1|/0/unnamed protein product [Thellungiella halophila]
CL8894.Contig2_NAU-LB	1484	130	70	21.2402	9.06985	-1.22765	Down	3.65418e-09	2.68907e-08	K06685|1|3e-13|75.1|ath:AT4G19050|maintenance of ploidy protein MOB1 (MPS1 binder 1)	GO:0009526//plastid envelope;GO:0044425//membrane part	GO:0004872//receptor activity;GO:0032559	GO:0012501//programmed cell death;GO:0006952//defense response;GO:0023052//signaling	gi|227438197|gb|ACP30588.1|/1.04973e-128/disease resistance protein [Brassica rapa subsp. pekinensis]
Unigene22566_NAU-LB	889	65	35	17.7281	7.57011	-1.22765	Down	3.09004e-05	0.000143682	K14431|1|8e-12|69.3|aly:ARALYDRAFT_311885|transcription factor TGA	GO:0043234//protein complex;GO:0009536//plastid	GO:0033612//receptor serine/threonine kinase binding;GO:0019787//small conjugating protein ligase activity	GO:0032446//protein modification by small protein conjugation	gi|297851224|ref|XP_002893493.1|/2.64949e-146/U-box domain-containing protein [Arabidopsis lyrata subsp. lyrata]
CL7881.Contig4_NAU-LB	1102	156	84	34.3236	14.6566	-1.22765	Down	1.02398e-10	8.59851e-10	K02137|1|5e-106|382|aly:ARALYDRAFT_488165|F-type H+-transporting ATPase oligomycin sensitivity conferral protein [EC:3.6.3.14]	GO:0009536//plastid;GO:0033178//proton-transporting two-sector ATPase complex, catalytic domain	GO:0015078//hydrogen ion transmembrane transporter activity;GO:0046914//transition metal ion binding	GO:0006818//hydrogen transport;GO:0006754//ATP biosynthetic process	gi|119720766|gb|ABL97953.1|/6.13622e-117/hydrogen-transporting ATP synthase [Brassica rapa]
CL7804.Contig3_NAU-LB	1956	340	183	42.1463	17.9895	-1.22825	Down	1.29134e-21	2.02551e-20	K12392|1|0.0|994|aly:ARALYDRAFT_489969|AP-1 complex subunit beta-1	GO:0030119//AP-type membrane coat adaptor complex	GO:0005515//protein binding;GO:0022892	GO:0015031//protein transport	gi|297809397|ref|XP_002872582.1|/0/hypothetical protein ARALYDRAFT_489969 [Arabidopsis lyrata subsp. lyrata]
Unigene20066_NAU-LB	4184	199	107	11.5322	4.91732	-1.22972	Down	2.6467e-13	2.68677e-12	K06636|1|0.0|1885|aly:ARALYDRAFT_323999|structural maintenance of chromosome 1	GO:0000793//condensed chromosome;GO:0009536//plastid	GO:0032559	GO:0007059//chromosome segregation;GO:0006996//organelle organization	gi|460425452|sp|Q6Q1P4.2|SMC1_ARATH/0/RecName: Full=Structural maintenance of chromosomes protein 1; Short=SMC protein 1; Short=SMC-1; AltName: Full=Chromosome segregation protein SMC-1; AltName: Full=Cohesin complex subunit SMC-1; AltName: Full=Protein TITAN8
Unigene19782_NAU-LB	1444	1155	621	193.939	82.6914	-1.22979	Down	1.57385e-69	7.40801e-68	K01090|1|3e-28|124|zma:100272962|protein phosphatase [EC:3.1.3.16]	GO:0043234//protein complex;GO:0031981//nuclear lumen;GO:0009532//plastid stroma	GO:0043169//cation binding;GO:0004721//phosphoprotein phosphatase activity	GO:0022900//electron transport chain;GO:0006796//phosphate-containing compound metabolic process;GO:0010109//regulation of photosynthesis;GO:0006464//cellular protein modification process	gi|312282329|dbj|BAJ34030.1|/0/unnamed protein product [Thellungiella halophila]
Unigene7339_NAU-LB	1275	281	151	53.4374	22.7721	-1.23058	Down	3.47862e-18	4.67197e-17	K13566|1|2e-165|580|aly:ARALYDRAFT_488046|omega-amidase [EC:3.5.1.3]	GO:0009536//plastid	GO:0046914//transition metal ion binding;GO:0016787//hydrolase activity	GO:0008152//metabolic process	gi|297807251|ref|XP_002871509.1|/2.16993e-164/carbon-nitrogen hydrolase family protein [Arabidopsis lyrata subsp. lyrata]
gi|158658275|gb|EX768166.1|EX768166	879	67	36	18.4814	7.87499	-1.23073	Down	2.24502e-05	0.000106647	K00860|1|8e-120|427|aly:ARALYDRAFT_480365|adenylylsulfate kinase [EC:2.7.1.25]	GO:0009536//plastid	GO:0016301//kinase activity;GO:0032559	GO:0007276//gamete generation;GO:0010675;GO:0006796//phosphate-containing compound metabolic process;GO:0006790//sulfur compound metabolic process	gi|297831946|ref|XP_002883855.1|/1.03075e-118/hypothetical protein ARALYDRAFT_480365 [Arabidopsis lyrata subsp. lyrata]
CL3748.Contig1_NAU-LB	1649	54	29	7.94004	3.38153	-1.23147	Down	0.000141536	0.00058988	K03686|1|1e-147|521|pop:POPTR_752360|molecular chaperone DnaJ	GO:0043231//intracellular membrane-bounded organelle	GO:0043169//cation binding;GO:0005515//protein binding;GO:0032559	GO:0051084//'de novo' posttranslational protein folding;GO:0007349//cellularization;GO:0048229//gametophyte development;GO:0000741//karyogamy;GO:0003006//developmental process involved in reproduction;GO:0006950//response to stress;GO:0090174	gi|18422864|ref|NP_568690.1|/0/gametophytic factor 2 [Arabidopsis thaliana]
Unigene10613_NAU-LB	971	82	44	20.4759	8.71304	-1.23268	Down	2.63592e-06	1.42136e-05	K01537|1|3e-141|499|ath:AT4G37640|Ca2+-transporting ATPase [EC:3.6.3.8]	GO:0031224//intrinsic to membrane;GO:0043231//intracellular membrane-bounded organelle;GO:0031090//organelle membrane	GO:0046914//transition metal ion binding;GO:0046873//metal ion transmembrane transporter activity;GO:0019829//cation-transporting ATPase activity;GO:0005515//protein binding;GO:0032559;GO:0016836//hydro-lyase activity	GO:0010035//response to inorganic substance;GO:0009206;GO:0006816//calcium ion transport	gi|62321152|dbj|BAD94283.1|/3.27195e-140/plasma membrane-type calcium ATPase [Arabidopsis thaliana]
CL9184.Contig1_NAU-LB	1091	261	140	58.005	24.674	-1.23319	Down	4.7284e-17	5.9915e-16	K02727|1|1e-121|434|ath:AT2G27020|20S proteasome subunit alpha 7 [EC:3.4.25.1]	GO:0005839//proteasome core complex;GO:0031090//organelle membrane;GO:0043231//intracellular membrane-bounded organelle;GO:0005576//extracellular region	GO:0004175//endopeptidase activity	GO:0019941//modification-dependent protein catabolic process;GO:0006950//response to stress;GO:0010038//response to metal ion	gi|15225839|ref|NP_180270.1|/1.54093e-120/proteasome subunit alpha type-3 [Arabidopsis thaliana]
Unigene17400_NAU-LB	1448	179	96	29.9733	12.7479	-1.23342	Down	3.65056e-12	3.44593e-11	K14486|1|0.0|665|aly:ARALYDRAFT_488981|auxin response factor	GO:0043231//intracellular membrane-bounded organelle	GO:0003676//nucleic acid binding;GO:0001071//nucleic acid binding transcription factor activity;GO:0005515//protein binding	GO:0048827//phyllome development;GO:0030522//intracellular receptor mediated signaling pathway;GO:0009606//tropism;GO:0009755//hormone-mediated signaling pathway;GO:0048527//lateral root development;GO:0006351//transcription, DNA-dependent	gi|379323208|gb|AFD01303.1|/0/auxin response factor 7-1 [Brassica rapa subsp. pekinensis]
Unigene15892_NAU-LB	1143	138	74	29.274	12.4486	-1.23363	Down	1.04868e-09	8.0864e-09	K12663|1|3e-111|399|aly:ARALYDRAFT_494675|delta(3,5)-Delta(2,4)-dienoyl-CoA isomerase [EC:5.3.3.-]	GO:0042579//microbody	GO:0016863//intramolecular oxidoreductase activity, transposing C=C bonds;GO:0016829//lyase activity	GO:0006631//fatty acid metabolic process	gi|15239823|ref|NP_199142.1|/2.55375e-113/delta(3,5),delta(2,4)-dienoyl-CoA isomerase 1 [Arabidopsis thaliana]
CL4401.Contig2_NAU-LB	2213	97	52	10.6277	4.51812	-1.23404	Down	3.14148e-07	1.90376e-06	K00234|1|0.0|1131|aly:ARALYDRAFT_496924|succinate dehydrogenase (ubiquinone) flavoprotein subunit [EC:1.3.5.1]	GO:0030312//external encapsulating structure;GO:0005746//mitochondrial respiratory chain	GO:0046914//transition metal ion binding;GO:0050662//coenzyme binding;GO:0000104//succinate dehydrogenase activity;GO:0032559	GO:0022904//respiratory electron transport chain;GO:0009060//aerobic respiration	gi|312282069|dbj|BAJ33900.1|/0/unnamed protein product [Thellungiella halophila]
CL3554.Contig2_NAU-LB	1065	56	30	12.7493	5.41636	-1.23503	Down	0.000102539	0.000440088	K09497|1|6e-176|614|aly:ARALYDRAFT_472896|T-complex protein 1 subunit epsilon	GO:0016020//membrane;GO:0044424//intracellular part	GO:0005515//protein binding;GO:0032559	GO:0044267//cellular protein metabolic process	gi|15221770|ref|NP_173859.1|/1.23473e-175/T-complex protein 1 subunit epsilon [Arabidopsis thaliana]
gnl|UG|Rsa#S41999260	818	114	61	33.791	14.3388	-1.23672	Down	2.76596e-08	1.87692e-07	K14207|1|3e-67|253|rcu:RCOM_0012320|solute carrier family 38 (sodium-coupled neutral amino acid transporter), member 2	GO:0031090//organelle membrane;GO:0043231//intracellular membrane-bounded organelle;GO:0031224//intrinsic to membrane	GO:0005275//amine transmembrane transporter activity	GO:0015837//amine transport;GO:0071241//cellular response to inorganic substance;GO:0010039//response to iron ion;GO:0009723//response to ethylene stimulus	gi|312281647|dbj|BAJ33689.1|/1.25213e-83/unnamed protein product [Thellungiella halophila]
Unigene12409_NAU-LB	1456	228	122	37.9685	16.1114	-1.23672	Down	3.78352e-15	4.29579e-14	K14677|1|0.0|746|aly:ARALYDRAFT_473822|aminoacylase [EC:3.5.1.14];K01436|3|0.0|710|ath:AT1G44180|amidohydrolase [EC:3.5.1.-]	GO:0043231//intracellular membrane-bounded organelle	GO:0016811//hydrolase activity, acting on carbon-nitrogen (but not peptide) bonds, in linear amides;GO:0070011//peptidase activity, acting on L-amino acid peptides	GO:0019538//protein metabolic process;GO:0019752//carboxylic acid metabolic process	gi|297846830|ref|XP_002891296.1|/0/hypothetical protein ARALYDRAFT_473822 [Arabidopsis lyrata subsp. lyrata]
Unigene18049_NAU-LB	1137	114	61	24.3105	10.3159	-1.23672	Down	2.76596e-08	1.87669e-07	-	GO:0043231//intracellular membrane-bounded organelle	GO:0003677//DNA binding;GO:0001071//nucleic acid binding transcription factor activity	GO:0006351//transcription, DNA-dependent;GO:0003006//developmental process involved in reproduction	gi|297809893|ref|XP_002872830.1|/7.12361e-116/hypothetical protein ARALYDRAFT_911958 [Arabidopsis lyrata subsp. lyrata]
Unigene19390_NAU-LB	1147	329	176	69.5476	29.5043	-1.23707	Down	3.45082e-21	5.31526e-20	K13456|1|1e-64|245|ath:AT3G25070|RPM1-interacting protein 4	GO:0016020//membrane	GO:0005488//binding	GO:0009626//plant-type hypersensitive response;GO:0002218//activation of innate immune response;GO:0009607//response to biotic stimulus;GO:0006464//cellular protein modification process	gi|146150661|gb|ABM30198.2|/4.91071e-72/resistance-gene-interacting protein [Brassica juncea]
CL677.Contig1_NAU-LB	1182	245	131	50.2572	21.3103	-1.23778	Down	3.47332e-16	4.19098e-15	K01251|1|0.0|695|aly:ARALYDRAFT_915516|adenosylhomocysteinase [EC:3.3.1.1]	GO:0043231//intracellular membrane-bounded organelle;GO:0031090//organelle membrane	GO:0016802;GO:0046914//transition metal ion binding	GO:0010608//posttranscriptional regulation of gene expression;GO:0006342//chromatin silencing;GO:0003006//developmental process involved in reproduction	gi|32967701|gb|AAP92454.1|/0/S-adenosyl-L-homocystein hydrolase [Brassica oleracea var. alboglabra]
CL6876.Contig1_NAU-LB	1328	219	117	39.9849	16.9404	-1.23898	Down	1.19876e-14	1.32244e-13	K01090|1|2e-43|174|sbi:SORBI_01g038410|protein phosphatase [EC:3.1.3.16];K14497|2|9e-42|169|vcn:VOLCADRAFT_61058|protein phosphatase 2C [EC:3.1.3.16]	GO:0043234//protein complex	GO:0004721//phosphoprotein phosphatase activity;GO:0043169//cation binding	GO:0006464//cellular protein modification process	gi|297792681|ref|XP_002864225.1|/1.58956e-149/hypothetical protein ARALYDRAFT_918384 [Arabidopsis lyrata subsp. lyrata]
CL2511.Contig1_NAU-LB	903	238	127	63.9056	27.0428	-1.2407	Down	8.06818e-16	9.53651e-15	K03941|1|4e-114|409|aly:ARALYDRAFT_895806|NADH dehydrogenase (ubiquinone) Fe-S protein 8 [EC:1.6.5.3 1.6.99.3]	GO:0030964;GO:0005746//mitochondrial respiratory chain	GO:0046914//transition metal ion binding;GO:0051536//iron-sulfur cluster binding;GO:0050136//NADH dehydrogenase (quinone) activity	GO:0051234//establishment of localization;GO:0006091//generation of precursor metabolites and energy	gi|15219265|ref|NP_178022.1|/5.22024e-113/NADH dehydrogenase [ubiquinone] iron-sulfur protein 8 [Arabidopsis thaliana]
CL3491.Contig1_NAU-LB	4500	90	48	4.8493	2.051	-1.24145	Down	7.4375e-07	4.3076e-06	K14401|1|0.0|2518|aly:ARALYDRAFT_495232|cleavage and polyadenylation specificity factor subunit 1	GO:0043231//intracellular membrane-bounded organelle	GO:0005488//binding	GO:0031124//mRNA 3'-end processing	gi|297792471|ref|XP_002864120.1|/0/hypothetical protein ARALYDRAFT_495232 [Arabidopsis lyrata subsp. lyrata]
Unigene81_NAU-LB	698	77	41	26.7476	11.2944	-1.2438	Down	4.56738e-06	2.38065e-05	K12619|1|5e-06|45.1|ath:AT1G75660|5'-3' exoribonuclease 2 [EC:3.1.13.-]	GO:0044464//cell part	GO:0004871//signal transducer activity;GO:0004672//protein kinase activity;GO:0032559	GO:0006464//cellular protein modification process	gi|15240831|ref|NP_196379.1|/7.31783e-28/protein kinase family protein [Arabidopsis thaliana]
CL5940.Contig1_NAU-LB	1754	94	50	12.9941	5.48121	-1.2453	Down	3.9555e-07	2.36128e-06	K01528|1|4e-41|112|mtr:MTR_2g009690|dynamin GTPase [EC:3.6.5.5]	GO:0043231//intracellular membrane-bounded organelle;GO:0031090//organelle membrane	GO:0017111//nucleoside-triphosphatase activity;GO:0032561//guanyl ribonucleotide binding	GO:0006952//defense response;GO:0006810//transport;GO:0010038//response to metal ion;GO:0009207	gi|297820878|ref|XP_002878322.1|/2.78593e-127/hypothetical protein ARALYDRAFT_486488 [Arabidopsis lyrata subsp. lyrata]
Unigene4850_NAU-LB	1006	188	100	45.3116	19.1134	-1.2453	Down	7.11316e-13	7.02208e-12	K00640|1|2e-144|509|ath:AT2G17640|serine O-acetyltransferase [EC:2.3.1.30]	GO:0044444//cytoplasmic part	GO:0016412//serine O-acyltransferase activity	GO:0006790//sulfur compound metabolic process;GO:0006563//L-serine metabolic process	gi|5597011|gb|AAD45614.2|L78444_1/2.56762e-143/serine acetyltranferase 2 [Arabidopsis thaliana]
CL8600.Contig1_NAU-LB	2006	175	93	21.1522	8.91432	-1.24661	Down	4.20704e-12	3.94643e-11	K00814|1|0.0|894|aly:ARALYDRAFT_889133|alanine transaminase [EC:2.6.1.2]	GO:0009536//plastid	GO:0046914//transition metal ion binding;GO:0047635;GO:0016846//carbon-sulfur lyase activity;GO:0048037//cofactor binding;GO:0032559	GO:0010038//response to metal ion;GO:0042853//L-alanine catabolic process;GO:0008652//cellular amino acid biosynthetic process;GO:0006950//response to stress	gi|297844672|ref|XP_002890217.1|/0/alanine aminotransferase [Arabidopsis lyrata subsp. lyrata]
CL8619.Contig1_NAU-LB	1928	113	60	14.2109	5.98384	-1.24785	Down	2.54006e-08	1.72996e-07	K00703|1|0.0|642|vcn:VOLCADRAFT_58732|starch synthase [EC:2.4.1.21]	GO:0005618//cell wall;GO:0009536//plastid	GO:0016843;GO:0046527//glucosyltransferase activity	GO:0005982//starch metabolic process;GO:0005977//glycogen metabolic process	gi|297844020|ref|XP_002889891.1|/0/hypothetical protein ARALYDRAFT_312200 [Arabidopsis lyrata subsp. lyrata]
CL299.Contig3_NAU-LB	980	309	164	76.4508	32.1776	-1.24847	Down	2.89108e-20	4.27881e-19	K07976|1|1e-113|407|ath:AT1G49300|Rab family, other;K07897|2|7e-110|395|aly:ARALYDRAFT_898258|Ras-related protein Rab-7A	GO:0031090//organelle membrane;GO:0043231//intracellular membrane-bounded organelle	GO:0032561//guanyl ribonucleotide binding;GO:0003824//catalytic activity	GO:0035556//intracellular signal transduction;GO:0006970//response to osmotic stress;GO:0006810//transport	gi|15222098|ref|NP_175355.1|/1.71779e-112/RAB GTPase homolog G3E [Arabidopsis thaliana]
gi|161542560|gb|EY914713.1|EY914713	657	98	52	36.1668	15.2186	-1.24883	Down	2.1052e-07	1.29468e-06	K08912|1|1e-89|327|aly:ARALYDRAFT_473204|light-harvesting complex II chlorophyll a/b binding protein 1	GO:0031224//intrinsic to membrane;GO:0009521;GO:0009526//plastid envelope;GO:0009534//chloroplast thylakoid;GO:0009570//chloroplast stroma;GO:0005576//extracellular region	GO:0043169//cation binding;GO:0046906//tetrapyrrole binding	GO:0009746;GO:0006091//generation of precursor metabolites and energy;GO:0009639//response to red or far red light;GO:0006464//cellular protein modification process	gi|109389998|gb|ABG29728.1|/2.70253e-90/chloroplast chlorophyll a/b binding protein [Brassica napus]
Unigene10287_NAU-LB	1182	134	71	27.4876	11.5499	-1.2509	Down	1.20899e-09	9.26603e-09	K10571|1|0.0|663|aly:ARALYDRAFT_489866|de-etiolated-1	GO:0043231//intracellular membrane-bounded organelle	GO:0005488//binding	GO:0006259//DNA metabolic process;GO:0007602//phototransduction;GO:0009640//photomorphogenesis	gi|297809229|ref|XP_002872498.1|/0/Light-mediated development protein DET1 [Arabidopsis lyrata subsp. lyrata]
CL8133.Contig1_NAU-LB	1365	189	100	33.5721	14.0865	-1.25295	Down	4.78456e-13	4.77846e-12	K02136|1|3e-159|560|ath:AT2G33040|F-type H+-transporting ATPase subunit gamma [EC:3.6.3.14]	GO:0030312//external encapsulating structure;GO:0031981//nuclear lumen;GO:0019866//organelle inner membrane;GO:0009536//plastid;GO:0033178//proton-transporting two-sector ATPase complex, catalytic domain	GO:0015078//hydrogen ion transmembrane transporter activity;GO:0046914//transition metal ion binding;GO:0019829//cation-transporting ATPase activity;GO:0032559	GO:0006818//hydrogen transport;GO:0006754//ATP biosynthetic process	gi|15227257|ref|NP_180863.1|/3.31755e-158/ATP synthase subunit gamma [Arabidopsis thaliana]
CL4732.Contig1_NAU-LB	1863	229	121	29.8038	12.4885	-1.2549	Down	1.5776e-15	1.83429e-14	K00850|1|0.0|848|aly:ARALYDRAFT_913590|6-phosphofructokinase [EC:2.7.1.11]	GO:0043234//protein complex;GO:0044444//cytoplasmic part;GO:0016020//membrane	GO:0008443//phosphofructokinase activity;GO:0032559	GO:0006796//phosphate-containing compound metabolic process;GO:0006007//glucose catabolic process	gi|297799072|ref|XP_002867420.1|/0/phosphofructokinase family protein [Arabidopsis lyrata subsp. lyrata]
CL3130.Contig1_NAU-LB	1693	89	47	12.7463	5.33798	-1.25571	Down	6.81908e-07	3.96305e-06	K03320|1|0.0|841|ath:AT2G38290|ammonium transporter, Amt family	GO:0031224//intrinsic to membrane	GO:0015101//organic cation transmembrane transporter activity;GO:0015291//secondary active transmembrane transporter activity	GO:0015696//ammonium transport;GO:0051707//response to other organism	gi|312281825|dbj|BAJ33778.1|/0/unnamed protein product [Thellungiella halophila]
CL432.Contig2_NAU-LB	2622	536	283	49.5657	20.7534	-1.25599	Down	2.83728e-34	6.79249e-33	K08955|1|3e-158|557|bdi:100842853|ATP-dependent metalloprotease [EC:3.4.24.-]	GO:0009536//plastid	GO:0004175//endopeptidase activity;GO:0042623//ATPase activity, coupled;GO:0032559	GO:0009642//response to light intensity;GO:0006950//response to stress;GO:0044257//cellular protein catabolic process	gi|18423480|ref|NP_568787.1|/0/cell division protease ftsH-11 [Arabidopsis thaliana]
CL1269.Contig7_NAU-LB	1472	271	143	44.6386	18.6795	-1.25684	Down	3.8765e-18	5.19505e-17	K14498|1|0.0|645|aly:ARALYDRAFT_888390|serine/threonine-protein kinase SRK2 [EC:2.7.11.1]	GO:0043231//intracellular membrane-bounded organelle	GO:0004672//protein kinase activity;GO:0032559	GO:0009725//response to hormone stimulus;GO:0006464//cellular protein modification process;GO:0006970//response to osmotic stress;GO:0006796//phosphate-containing compound metabolic process	gi|289372|gb|AAA33003.1|/0/serine/threonine protein kinase [Brassica napus]
gi|161562739|gb|EY934314.1|EY934314	703	55	29	18.9695	7.93193	-1.25794	Down	9.39878e-05	0.000404701	K02910|1|1e-47|187|aly:ARALYDRAFT_492190|large subunit ribosomal protein L31e	GO:0015934//large ribosomal subunit;GO:0016020//membrane;GO:0030312//external encapsulating structure;GO:0009536//plastid	GO:0005198//structural molecule activity	GO:0010467//gene expression;GO:0022613//ribonucleoprotein complex biogenesis	gi|297803472|ref|XP_002869620.1|/1.22226e-46/60S ribosomal protein L31 [Arabidopsis lyrata subsp. lyrata]
Unigene9792_NAU-LB	1846	74	39	9.71962	4.06227	-1.25861	Down	5.75134e-06	2.97544e-05	K08518|1|0.0|808|ath:AT5G05570|syntaxin-binding protein 5	GO:0016020//membrane	GO:0016741;GO:0005488//binding	GO:0006730//one-carbon metabolic process;GO:0006810//transport	gi|334187437|ref|NP_001190229.1|/0/syntaxin binding protein 5 (tomosyn) [Arabidopsis thaliana]
Unigene20119_NAU-LB	2482	95	50	9.2805	3.87351	-1.26056	Down	2.64276e-07	1.61066e-06	K10843|1|0.0|1319|aly:ARALYDRAFT_916071|DNA excision repair protein ERCC-3 [EC:3.6.4.12]	GO:0043231//intracellular membrane-bounded organelle	GO:0003676//nucleic acid binding;GO:0003678//DNA helicase activity;GO:0042623//ATPase activity, coupled;GO:0032559	GO:0042221//response to chemical stimulus;GO:0009411//response to UV;GO:0006281//DNA repair	gi|47606403|gb|AAT36215.1|/0/DNA repair and transcription factor XPB1 [Arabidopsis thaliana]
CL6224.Contig2_NAU-LB	1940	57	30	7.12398	2.97342	-1.26056	Down	6.8088e-05	0.000299016	K14506|1|0.0|1041|aly:ARALYDRAFT_483789|jasmonic acid-amino synthetase;K14487|3|0.0|800|pop:POPTR_816623|auxin responsive GH3 gene family	GO:0043231//intracellular membrane-bounded organelle	GO:0016779//nucleotidyltransferase activity;GO:0016881//acid-amino acid ligase activity;GO:0005515//protein binding;GO:0032559	GO:0009411//response to UV;GO:0031407//oxylipin metabolic process;GO:0010118//stomatal movement;GO:0009636//response to toxic substance;GO:0009611//response to wounding;GO:0007602//phototransduction;GO:0002218//activation of innate immune response;GO:0009733//response to auxin stimulus;GO:0009639//response to red or far red light;GO:0009814//defense response, incompatible interaction	gi|392311801|pdb|4EPL|A/0/Chain A, Crystal Structure Of Arabidopsis Thaliana Gh3.11 (Jar1) In Complex With Ja-Ile
CL6549.Contig2_NAU-LB	1148	733	385	154.814	64.4844	-1.26352	Down	1.15858e-46	3.70778e-45	K15040|1|7e-126|448|aly:ARALYDRAFT_488350|voltage-dependent anion channel protein 2	GO:0030312//external encapsulating structure;GO:0031966//mitochondrial membrane;GO:0031981//nuclear lumen;GO:0009526//plastid envelope	GO:0005488//binding;GO:0005244//voltage-gated ion channel activity	GO:0006952//defense response;GO:0051707//response to other organism;GO:0009845//seed germination;GO:0045333//cellular respiration;GO:0043269//regulation of ion transport	gi|42601787|gb|AAS21632.1|/5.13827e-146/voltage-dependent anion-selective channel protein [Brassica rapa]
Unigene9278_NAU-LB	1746	84	44	11.665	4.84557	-1.26745	Down	1.1745e-06	6.60757e-06	K05387|1|0.0|869|aly:ARALYDRAFT_485499|glutamate receptor, ionotropic, other eukaryote	GO:0031224//intrinsic to membrane;GO:0030313	GO:0008066//glutamate receptor activity;GO:0005231//excitatory extracellular ligand-gated ion channel activity	GO:0009314//response to radiation;GO:0006810//transport;GO:0006875//cellular metal ion homeostasis;GO:0007166//cell surface receptor signaling pathway	gi|297816412|ref|XP_002876089.1|/0/ATGLR3.6 [Arabidopsis lyrata subsp. lyrata]
Unigene16522_NAU-LB	1701	84	44	11.9736	4.97376	-1.26745	Down	1.1745e-06	6.60824e-06	K14775|1|2e-107|388|sbi:SORBI_09g028130|ribosome biogenesis protein UTP30	GO:0005789//endoplasmic reticulum membrane	GO:0016787//hydrolase activity	GO:0046488//phosphatidylinositol metabolic process;GO:0015031//protein transport	gi|297828219|ref|XP_002881992.1|/0/predicted protein [Arabidopsis lyrata subsp. lyrata]
gnl|UG|Rsa#S41983628	715	105	55	35.6068	14.7908	-1.26745	Down	5.4644e-08	3.58377e-07	K02183|1|1e-78|290|bdi:100839997|calmodulin	GO:0031090//organelle membrane	GO:0046872//metal ion binding	GO:0019932//second-messenger-mediated signaling;GO:0009640//photomorphogenesis;GO:0009593//detection of chemical stimulus	gi|462398167|gb|EMJ03835.1|/3.64812e-78/hypothetical protein PRUPE_ppa012070mg [Prunus persica]
Unigene6221_NAU-LB	937	2634	1379	681.594	282.983	-1.2682	Down	8.40792e-164	9.14653e-162	K01802|1|4e-72|269|ath:AT2G21130|peptidylprolyl isomerase [EC:5.2.1.8]	GO:0016020//membrane;GO:0009536//plastid	GO:0016859//cis-trans isomerase activity;GO:0005488//binding	GO:0044267//cellular protein metabolic process;GO:0023052//signaling	gi|1345921|sp|P24525.2|CYPH_BRANA/5.06168e-82/RecName: Full=Peptidyl-prolyl cis-trans isomerase; Short=PPIase; AltName: Full=Cyclophilin; AltName: Full=Cyclosporin A-binding protein; AltName: Full=Rotamase
Unigene21241_NAU-LB	1722	170	89	23.9368	9.93786	-1.26822	Down	4.40942e-12	4.13278e-11	K11819|1|0.0|819|aly:ARALYDRAFT_480895|ROOTY/SUPERROOT1 [EC:4.4.1.-];K00815|3|4e-137|486|pop:POPTR_836654|tyrosine aminotransferase [EC:2.6.1.5]	GO:0044464//cell part	GO:0016769//transferase activity, transferring nitrogenous groups;GO:0016846//carbon-sulfur lyase activity;GO:0048037//cofactor binding	GO:0009683;GO:0048364//root development;GO:0001558//regulation of cell growth;GO:0008652//cellular amino acid biosynthetic process;GO:0019758	gi|197090709|gb|ACH41755.1|/0/SUR1 [Brassica rapa subsp. rapa]
Unigene5649_NAU-LB	1748	757	396	105.004	43.5602	-1.26936	Down	1.79914e-48	5.99235e-47	K13071|1|1e-70|266|osa:4331611|pheophorbide a oxygenase [EC:1.14.12.20]	GO:0009526//plastid envelope	GO:0016703;GO:0043169//cation binding;GO:0051536//iron-sulfur cluster binding	GO:0008152//metabolic process	gi|18416592|ref|NP_567725.1|/0/ACD1-like protein [Arabidopsis thaliana]
Unigene27_NAU-LB	873	1719	898	477.431	197.787	-1.27134	Down	5.31824e-108	3.83942e-106	K11517|1|2e-63|240|ath:AT3G14415|(S)-2-hydroxy-acid oxidase [EC:1.1.3.15]	GO:0005840//ribosome;GO:0009532//plastid stroma;GO:0005576//extracellular region;GO:0042579//microbody	GO:0003973//(S)-2-hydroxy-acid oxidase activity;GO:0000166//nucleotide binding	GO:0008152//metabolic process	gi|54043095|gb|AAV28535.1|/9.4189e-64/glycolate oxidase [Brassica napus]
Unigene20263_NAU-LB	2103	67	35	7.72476	3.20011	-1.27137	Down	1.36837e-05	6.72913e-05	K14431|1|3e-23|108|aly:ARALYDRAFT_311885|transcription factor TGA;K08332|2|1e-18|93.6|vcn:VOLCADRAFT_41528|vacuolar protein 8;K09561|4|3e-07|55.8|ath:AT3G07370|STIP1 homology and U-box containing protein 1 [EC:6.3.2.19]	GO:0043234//protein complex	GO:0033612//receptor serine/threonine kinase binding;GO:0019787//small conjugating protein ligase activity	GO:0032446//protein modification by small protein conjugation	gi|297816784|ref|XP_002876275.1|/0/armadillo/beta-catenin repeat family protein [Arabidopsis lyrata subsp. lyrata]
gi|166105308|gb|FD538286.1|FD538286	797	180	94	54.76	22.678	-1.27183	Down	9.30482e-13	9.1225e-12	K08145|1|6e-58|222|vvi:100266019|MFS transporter, SP family, solute carrier family 2 (facilitated glucose transporter), member 8	GO:0031090//organelle membrane;GO:0043231//intracellular membrane-bounded organelle;GO:0031224//intrinsic to membrane	GO:0022891//substrate-specific transmembrane transporter activity;GO:0016491//oxidoreductase activity	GO:0006810//transport	gi|297850342|ref|XP_002893052.1|/5.42864e-76/hypothetical protein ARALYDRAFT_472174 [Arabidopsis lyrata subsp. lyrata]
CL2646.Contig2_NAU-LB	613	205	107	81.0854	33.5629	-1.27258	Down	2.44998e-14	2.65326e-13	K02219|1|1e-37|154|aly:ARALYDRAFT_481712|cyclin-dependent kinase regulatory subunit CKS1	GO:0043231//intracellular membrane-bounded organelle	GO:0019887//protein kinase regulator activity;GO:0005488//binding;GO:0016772//transferase activity, transferring phosphorus-containing groups	GO:0006261//DNA-dependent DNA replication;GO:0007049//cell cycle;GO:0006796//phosphate-containing compound metabolic process	gi|117165994|dbj|BAF36296.1|/2.98829e-37/hypothetical protein [Ipomoea trifida]
Unigene19578_NAU-LB	1923	1006	525	126.843	52.4948	-1.2728	Down	4.29854e-64	1.87119e-62	K08282|1|2e-15|82.4|cme:CMS463C|non-specific serine/threonine protein kinase [EC:2.7.11.1];K07760|2|6e-13|74.3|ath:AT3G54180|cyclin-dependent kinase [EC:2.7.11.22];K02206|3|2e-10|66.2|aly:ARALYDRAFT_485229|cyclin-dependent kinase 2 [EC:2.7.11.22];K00924|4|2e-10|65.9|osa:4346016|[EC:2.7.1.-]	GO:0009536//plastid	GO:0004672//protein kinase activity;GO:0032559	GO:0006464//cellular protein modification process;GO:0010109//regulation of photosynthesis;GO:0048511//rhythmic process	gi|18409136|ref|NP_564946.1|/0/serine/threonine-protein kinase SNT7 [Arabidopsis thaliana]
Unigene18798_NAU-LB	1550	142	74	22.2129	9.17986	-1.27486	Down	2.11854e-10	1.73188e-09	K03065|1|0.0|793|aly:ARALYDRAFT_896637|26S proteasome regulatory subunit T5	GO:0005838//proteasome regulatory particle;GO:0043231//intracellular membrane-bounded organelle	GO:0005515//protein binding;GO:0017111//nucleoside-triphosphatase activity;GO:0032559	GO:0019941//modification-dependent protein catabolic process;GO:0048229//gametophyte development	gi|12697589|dbj|BAB21595.1|/0/Tat binding protein like protein [Brassica rapa]
CL7465.Contig1_NAU-LB	3150	167	87	12.8545	5.31061	-1.27532	Down	5.49586e-12	5.11998e-11	K01537|1|0.0|1769|ath:AT1G10130|Ca2+-transporting ATPase [EC:3.6.3.8];K05853|2|0.0|1758|aly:ARALYDRAFT_471128|Ca2+ transporting ATPase, sarcoplasmic/endoplasmic reticulum [EC:3.6.3.8]	GO:0031224//intrinsic to membrane;GO:0043231//intracellular membrane-bounded organelle	GO:0019829//cation-transporting ATPase activity;GO:0005515//protein binding;GO:0032559	GO:0009206;GO:0055080//cation homeostasis;GO:0000041//transition metal ion transport;GO:0048513//organ development;GO:0070838//divalent metal ion transport	gi|18391113|ref|NP_563860.1|/0/Ca2+-transporting ATPase [Arabidopsis thaliana]
Unigene5959_NAU-LB	1528	192	100	30.4668	12.5838	-1.27567	Down	1.44088e-13	1.48824e-12	K03093|1|0.0|735|ath:AT3G53920|RNA polymerase sigma factor	GO:0009536//plastid	GO:0034062//RNA polymerase activity;GO:0003676//nucleic acid binding;GO:0001071//nucleic acid binding transcription factor activity;GO:0000996	GO:0006351//transcription, DNA-dependent;GO:0015979//photosynthesis	gi|7363220|emb|CAB83107.1|/0/sigma factor 3 [Sinapis alba]
Unigene21765_NAU-LB	1042	48	25	11.1692	4.61326	-1.27567	Down	0.000226582	0.000911526	K03686|1|2e-14|78.2|ath:AT2G22360|molecular chaperone DnaJ	GO:0009534//chloroplast thylakoid	GO:0005515//protein binding	GO:0006950//response to stress;GO:0044267//cellular protein metabolic process	gi|15238746|ref|NP_197315.1|/1.11745e-96/chaperone DnaJ-domain containing protein [Arabidopsis thaliana]
gi|167436556|gb|FD943059.1|FD943059	875	48	25	13.3009	5.49374	-1.27567	Down	0.000226582	0.000911328	K09569|1|2e-65|247|aly:ARALYDRAFT_899143|FK506-binding protein 2 [EC:5.2.1.8]	GO:0009534//chloroplast thylakoid	GO:0016859//cis-trans isomerase activity;GO:0005527//macrolide binding	GO:0044267//cellular protein metabolic process	gi|297831418|ref|XP_002883591.1|/2.47866e-64/FK506-binding protein 15 kD-1 [Arabidopsis lyrata subsp. lyrata]
[truncated: 4,899 more rows]
